# Supplementary material
Source: publisher figshare collection journal article supplement (https://acs.figshare.com/ndownloader/files/3764278)
Supplement: Supplementary file 1 [file 3764278]

 
data_cu_gg1403sa-new
 
_audit_creation_method            SHELXL-2014/6
_chemical_name_systematic         ?
_chemical_name_common             ?
_chemical_melting_point           ?
_chemical_formula_moiety          'C19 H16 F3 N3 O2, C2 H3 N ' 
_chemical_formula_sum
 'C21 H19 F3 N4 O2' 
_chemical_formula_weight          416.40

loop_
 _atom_type_symbol
 _atom_type_description
 _atom_type_scat_dispersion_real
 _atom_type_scat_dispersion_imag
 _atom_type_scat_source
 'C'  'C'   0.0181   0.0091
 'International Tables Vol C Tables 4.2.6.8 and 6.1.1.4'
 'H'  'H'   0.0000   0.0000
 'International Tables Vol C Tables 4.2.6.8 and 6.1.1.4'
 'N'  'N'   0.0311   0.0180
 'International Tables Vol C Tables 4.2.6.8 and 6.1.1.4'
 'O'  'O'   0.0492   0.0322
 'International Tables Vol C Tables 4.2.6.8 and 6.1.1.4'
 'F'  'F'   0.0727   0.0534
 'International Tables Vol C Tables 4.2.6.8 and 6.1.1.4'
 
_space_group_crystal_system       monoclinic
_space_group_IT_number            14
_space_group_name_H-M_alt         'P 21/c'
_space_group_name_Hall            '-P 2ybc'
 
_shelx_space_group_comment
;
The symmetry employed for this shelxl refinement is uniquely defined
by the following loop, which should always be used as a source of
symmetry information in preference to the above space-group names.
They are only intended as comments.
;
 
loop_
 _space_group_symop_operation_xyz
 'x, y, z'
 '-x, y+1/2, -z+1/2'
 '-x, -y, -z'
 'x, -y-1/2, z-1/2'
 
_cell_length_a                    22.1268(6)
_cell_length_b                    5.36110(10)
_cell_length_c                    16.7753(4)
_cell_angle_alpha                 90
_cell_angle_beta                  101.5204(9)
_cell_angle_gamma                 90
_cell_volume                      1949.86(8)
_cell_formula_units_Z             4
_cell_measurement_temperature     100(2)
_cell_measurement_reflns_used     9992 
_cell_measurement_theta_min       5.36 
_cell_measurement_theta_max       72.01 
  
_exptl_crystal_description        platelet 
_exptl_crystal_colour             colorless 
_exptl_crystal_density_meas       ?
_exptl_crystal_density_method     ?
_exptl_crystal_density_diffrn     1.418          
_exptl_crystal_F_000              864
_exptl_transmission_factor_min    ?
_exptl_transmission_factor_max    ?
_exptl_crystal_size_max           0.400
_exptl_crystal_size_mid           0.200
_exptl_crystal_size_min           0.060
_exptl_absorpt_coefficient_mu     0.963
_shelx_estimated_absorpt_T_min    0.699
_shelx_estimated_absorpt_T_max    0.944
_exptl_absorpt_correction_type    'multi-scan'
_exptl_absorpt_correction_T_min   0.64
_exptl_absorpt_correction_T_max   0.75
_exptl_absorpt_process_details    ?
_exptl_absorpt_special_details    ?
_diffrn_ambient_temperature       100(2)
_diffrn_radiation_wavelength      1.54178
_diffrn_radiation_type            CuK\a
_diffrn_source                    ?
_diffrn_measurement_device_type   ?
_diffrn_measurement_method        ?
_diffrn_detector_area_resol_mean  ?
_diffrn_reflns_number             18767
_diffrn_reflns_av_unetI/netI      0.0219
_diffrn_reflns_av_R_equivalents   0.0272
_diffrn_reflns_limit_h_min        -23
_diffrn_reflns_limit_h_max        27
_diffrn_reflns_limit_k_min        -6
_diffrn_reflns_limit_k_max        6
_diffrn_reflns_limit_l_min        -20
_diffrn_reflns_limit_l_max        20
_diffrn_reflns_theta_min          2.038
_diffrn_reflns_theta_max          72.068
_diffrn_reflns_theta_full         67.679
_diffrn_measured_fraction_theta_max   0.994
_diffrn_measured_fraction_theta_full  0.998
_diffrn_reflns_Laue_measured_fraction_max    0.994
_diffrn_reflns_Laue_measured_fraction_full   0.998
_diffrn_reflns_point_group_measured_fraction_max   0.994
_diffrn_reflns_point_group_measured_fraction_full  0.998
_reflns_number_total              3824
_reflns_number_gt                 3712
_reflns_threshold_expression      'I > 2\s(I)'
_reflns_Friedel_coverage          0.000
_reflns_Friedel_fraction_max      .
_reflns_Friedel_fraction_full     .
 
_reflns_special_details
;
 Reflections were merged by SHELXL according to the crystal
 class for the calculation of statistics and refinement.
 
 _reflns_Friedel_fraction is defined as the number of unique
 Friedel pairs measured divided by the number that would be
 possible theoretically, ignoring centric projections and
 systematic absences.
;
 
_computing_data_collection        'Bruker APEX2' 
_computing_cell_refinement        'Bruker SAINT' 
_computing_data_reduction         'Bruker SAINT' 
_computing_structure_solution     'SHELXS-97 (Sheldrick 2008)' 
_computing_structure_refinement 'SHELXL-2014/6 (Sheldrick, 2014)'
_computing_molecular_graphics     'Bruker SHELXTL' 
_computing_publication_material   'Bruker SHELXTL' 
_refine_special_details           ?
_refine_ls_structure_factor_coef  Fsqd
_refine_ls_matrix_type            full
_refine_ls_weighting_scheme       calc
_refine_ls_weighting_details
'w=1/[\s^2^(Fo^2^)+(0.0590P)^2^+0.9369P] where P=(Fo^2^+2Fc^2^)/3'
_atom_sites_solution_primary      ?
_atom_sites_solution_secondary    ?
_atom_sites_solution_hydrogens    geom
_refine_ls_hydrogen_treatment     constr
_refine_ls_extinction_method      none
_refine_ls_extinction_coef        .
_refine_ls_number_reflns          3824
_refine_ls_number_parameters      273
_refine_ls_number_restraints      0
_refine_ls_R_factor_all           0.0385
_refine_ls_R_factor_gt            0.0376
_refine_ls_wR_factor_ref          0.1023
_refine_ls_wR_factor_gt           0.1011
_refine_ls_goodness_of_fit_ref    1.027
_refine_ls_restrained_S_all       1.027
_refine_ls_shift/su_max           0.001
_refine_ls_shift/su_mean          0.000
 
loop_
 _atom_site_label
 _atom_site_type_symbol
 _atom_site_fract_x
 _atom_site_fract_y
 _atom_site_fract_z
 _atom_site_U_iso_or_equiv
 _atom_site_adp_type
 _atom_site_occupancy
 _atom_site_site_symmetry_order  
 _atom_site_calc_flag
 _atom_site_refinement_flags_posn
 _atom_site_refinement_flags_adp
 _atom_site_refinement_flags_occupancy
 _atom_site_disorder_assembly
 _atom_site_disorder_group
F1 F 0.09752(4) 0.46478(18) 0.49845(5) 0.0335(2) Uani 1 1 d . . . . .
F2 F 0.03838(3) 0.73636(18) 0.53778(5) 0.0344(2) Uani 1 1 d . . . . .
F3 F 0.06607(4) 0.40867(18) 0.61063(5) 0.0382(2) Uani 1 1 d . . . . .
O1 O 0.24973(4) 0.78639(17) 0.75504(5) 0.0230(2) Uani 1 1 d . . . . .
O2 O 0.21096(4) 0.40958(17) 0.77741(5) 0.0218(2) Uani 1 1 d . . . . .
N1 N 0.23896(4) 0.6359(2) 0.59145(6) 0.0180(2) Uani 1 1 d . . . . .
N2 N 0.21708(5) 0.8393(2) 0.54756(6) 0.0220(2) Uani 1 1 d . . . . .
N3 N 0.16311(5) 0.8969(2) 0.55405(7) 0.0247(2) Uani 1 1 d . . . . .
C1 C 0.53585(5) 0.2641(2) 0.68154(7) 0.0170(2) Uani 1 1 d . . . . .
H1 H 0.5228 0.1276 0.7100 0.020 Uiso 1 1 calc R U . . .
C2 C 0.59808(5) 0.3010(2) 0.68134(7) 0.0188(2) Uani 1 1 d . . . . .
H2 H 0.6278 0.1883 0.7099 0.023 Uiso 1 1 calc R U . . .
C3 C 0.61725(5) 0.5014(2) 0.63969(7) 0.0200(3) Uani 1 1 d . . . . .
H3 H 0.6599 0.5243 0.6405 0.024 Uiso 1 1 calc R U . . .
C4 C 0.57442(5) 0.6691(2) 0.59681(7) 0.0188(2) Uani 1 1 d . . . . .
H4 H 0.5876 0.8050 0.5682 0.023 Uiso 1 1 calc R U . . .
C5 C 0.51211(5) 0.6335(2) 0.59665(7) 0.0164(2) Uani 1 1 d . . . . .
C6 C 0.49307(5) 0.4320(2) 0.63900(7) 0.0153(2) Uani 1 1 d . . . . .
C7 C 0.42577(5) 0.4435(2) 0.63034(7) 0.0151(2) Uani 1 1 d . . . . .
C8 C 0.40393(5) 0.6527(2) 0.58256(7) 0.0158(2) Uani 1 1 d . . . . .
C9 C 0.45678(5) 0.7845(2) 0.55564(7) 0.0167(2) Uani 1 1 d . . . . .
H9A H 0.4601 0.9601 0.5744 0.020 Uiso 1 1 calc R U . . .
H9B H 0.4520 0.7806 0.4957 0.020 Uiso 1 1 calc R U . . .
C10 C 0.38515(5) 0.2940(2) 0.66246(7) 0.0170(2) Uani 1 1 d . . . . .
H10 H 0.3997 0.1510 0.6939 0.020 Uiso 1 1 calc R U . . .
C11 C 0.32287(5) 0.3567(2) 0.64789(7) 0.0177(2) Uani 1 1 d . . . . .
H11 H 0.2945 0.2551 0.6689 0.021 Uiso 1 1 calc R U . . .
C12 C 0.30193(5) 0.5699(2) 0.60215(7) 0.0167(2) Uani 1 1 d . . . . .
C13 C 0.34220(5) 0.7179(2) 0.56815(7) 0.0169(2) Uani 1 1 d . . . . .
H13 H 0.3276 0.8595 0.5360 0.020 Uiso 1 1 calc R U . . .
C14 C 0.14104(5) 0.7190(2) 0.61021(7) 0.0204(3) Uani 1 1 d . . . . .
H14 H 0.1296 0.8121 0.6567 0.024 Uiso 1 1 calc R U . . .
C15 C 0.19636(5) 0.5463(2) 0.64186(7) 0.0177(2) Uani 1 1 d . . . . .
H15 H 0.1856 0.3664 0.6316 0.021 Uiso 1 1 calc R U . . .
C16 C 0.22293(5) 0.5977(2) 0.73165(7) 0.0174(2) Uani 1 1 d . . . . .
C17 C 0.23328(7) 0.4404(3) 0.86515(7) 0.0270(3) Uani 1 1 d . . . . .
H17A H 0.2124 0.5834 0.8855 0.032 Uiso 1 1 calc R U . . .
H17B H 0.2783 0.4717 0.8771 0.032 Uiso 1 1 calc R U . . .
C18 C 0.21894(7) 0.2031(3) 0.90532(8) 0.0285(3) Uani 1 1 d . . . . .
H18A H 0.2400 0.0633 0.8849 0.043 Uiso 1 1 calc R U . . .
H18B H 0.1743 0.1741 0.8929 0.043 Uiso 1 1 calc R U . . .
H18C H 0.2332 0.2173 0.9643 0.043 Uiso 1 1 calc R U . . .
C19 C 0.08546(6) 0.5811(3) 0.56371(8) 0.0254(3) Uani 1 1 d . . . . .
N4 N 0.91663(7) 0.3667(3) 0.72566(8) 0.0428(3) Uani 1 1 d . . . . .
C20 C 0.92849(7) 0.1997(3) 0.68901(9) 0.0312(3) Uani 1 1 d . . . . .
C21 C 0.94353(8) -0.0107(3) 0.64237(10) 0.0391(4) Uani 1 1 d . . . . .
H21A H 0.9865 0.0025 0.6362 0.059 Uiso 1 1 calc R U . . .
H21B H 0.9163 -0.0109 0.5885 0.059 Uiso 1 1 calc R U . . .
H21C H 0.9379 -0.1660 0.6708 0.059 Uiso 1 1 calc R U . . .
 
loop_
 _atom_site_aniso_label
 _atom_site_aniso_U_11
 _atom_site_aniso_U_22
 _atom_site_aniso_U_33
 _atom_site_aniso_U_23
 _atom_site_aniso_U_13
 _atom_site_aniso_U_12
F1 0.0257(4) 0.0445(5) 0.0280(4) -0.0120(4) -0.0006(3) 0.0011(4)
F2 0.0167(4) 0.0467(5) 0.0371(5) -0.0028(4) -0.0009(3) 0.0059(3)
F3 0.0261(4) 0.0463(5) 0.0411(5) 0.0062(4) 0.0040(4) -0.0137(4)
O1 0.0235(4) 0.0252(5) 0.0202(4) -0.0038(4) 0.0039(3) -0.0055(4)
O2 0.0258(4) 0.0229(5) 0.0168(4) 0.0002(3) 0.0039(3) -0.0022(4)
N1 0.0164(5) 0.0214(5) 0.0165(5) 0.0024(4) 0.0041(4) 0.0017(4)
N2 0.0185(5) 0.0241(5) 0.0227(5) 0.0043(4) 0.0025(4) 0.0023(4)
N3 0.0185(5) 0.0271(6) 0.0287(5) 0.0052(5) 0.0052(4) 0.0032(4)
C1 0.0196(6) 0.0168(6) 0.0144(5) -0.0001(4) 0.0027(4) 0.0007(4)
C2 0.0179(6) 0.0195(6) 0.0176(5) -0.0005(4) 0.0006(4) 0.0039(4)
C3 0.0163(5) 0.0219(6) 0.0217(6) -0.0028(5) 0.0036(4) -0.0002(5)
C4 0.0199(6) 0.0172(6) 0.0195(5) -0.0002(4) 0.0049(4) -0.0007(5)
C5 0.0194(6) 0.0146(5) 0.0149(5) -0.0023(4) 0.0028(4) 0.0015(4)
C6 0.0175(5) 0.0154(5) 0.0129(5) -0.0028(4) 0.0027(4) 0.0005(4)
C7 0.0172(5) 0.0151(5) 0.0126(5) -0.0021(4) 0.0019(4) 0.0018(4)
C8 0.0191(6) 0.0146(5) 0.0134(5) -0.0024(4) 0.0029(4) 0.0006(4)
C9 0.0179(5) 0.0146(5) 0.0176(5) 0.0010(4) 0.0036(4) 0.0018(4)
C10 0.0197(6) 0.0152(5) 0.0158(5) -0.0008(4) 0.0030(4) 0.0011(4)
C11 0.0181(6) 0.0184(6) 0.0172(5) -0.0014(4) 0.0051(4) -0.0015(4)
C12 0.0160(5) 0.0194(6) 0.0141(5) -0.0038(4) 0.0014(4) 0.0018(4)
C13 0.0188(6) 0.0167(6) 0.0147(5) -0.0006(4) 0.0022(4) 0.0023(4)
C14 0.0166(6) 0.0257(6) 0.0191(5) -0.0009(5) 0.0039(4) 0.0014(5)
C15 0.0141(5) 0.0206(6) 0.0185(6) -0.0015(4) 0.0038(4) -0.0008(4)
C16 0.0136(5) 0.0213(6) 0.0179(5) -0.0009(4) 0.0045(4) 0.0014(4)
C17 0.0387(7) 0.0265(7) 0.0152(6) -0.0003(5) 0.0036(5) 0.0010(6)
C18 0.0372(7) 0.0274(7) 0.0225(6) 0.0040(5) 0.0103(5) 0.0056(6)
C19 0.0164(6) 0.0341(7) 0.0252(6) -0.0010(5) 0.0031(5) 0.0003(5)
N4 0.0499(8) 0.0461(8) 0.0357(7) 0.0018(6) 0.0162(6) 0.0039(7)
C20 0.0280(7) 0.0376(8) 0.0285(7) 0.0070(6) 0.0071(5) -0.0017(6)
C21 0.0373(8) 0.0362(8) 0.0427(9) -0.0025(7) 0.0053(7) 0.0006(7)
 
_geom_special_details
;
 All esds (except the esd in the dihedral angle between two l.s. planes)
 are estimated using the full covariance matrix.  The cell esds are taken
 into account individually in the estimation of esds in distances, angles
 and torsion angles; correlations between esds in cell parameters are only
 used when they are defined by crystal symmetry.  An approximate (isotropic)
 treatment of cell esds is used for estimating esds involving l.s. planes.
;
 
loop_
 _geom_bond_atom_site_label_1
 _geom_bond_atom_site_label_2
 _geom_bond_distance
 _geom_bond_site_symmetry_2
 _geom_bond_publ_flag
F1 C19 1.3323(15) . ?
F2 C19 1.3367(16) . ?
F3 C19 1.3389(16) . ?
O1 C16 1.1983(15) . ?
O2 C16 1.3258(15) . ?
O2 C17 1.4654(14) . ?
N1 N2 1.3503(15) . ?
N1 C12 1.4138(15) . ?
N1 C15 1.4672(14) . ?
N2 N3 1.2591(15) . ?
N3 C14 1.4899(16) . ?
C1 C2 1.3917(16) . ?
C1 C6 1.3950(16) . ?
C1 H1 0.9500 . ?
C2 C3 1.3931(18) . ?
C2 H2 0.9500 . ?
C3 C4 1.3968(17) . ?
C3 H3 0.9500 . ?
C4 C5 1.3914(16) . ?
C4 H4 0.9500 . ?
C5 C6 1.4032(16) . ?
C5 C9 1.5136(16) . ?
C6 C7 1.4682(15) . ?
C7 C10 1.3905(16) . ?
C7 C8 1.4069(16) . ?
C8 C13 1.3836(16) . ?
C8 C9 1.5105(16) . ?
C9 H9A 0.9900 . ?
C9 H9B 0.9900 . ?
C10 C11 1.3918(16) . ?
C10 H10 0.9500 . ?
C11 C12 1.4030(17) . ?
C11 H11 0.9500 . ?
C12 C13 1.3969(17) . ?
C13 H13 0.9500 . ?
C14 C19 1.5114(17) . ?
C14 C15 1.5418(16) . ?
C14 H14 1.0000 . ?
C15 C16 1.5286(15) . ?
C15 H15 1.0000 . ?
C17 C18 1.5026(19) . ?
C17 H17A 0.9900 . ?
C17 H17B 0.9900 . ?
C18 H18A 0.9800 . ?
C18 H18B 0.9800 . ?
C18 H18C 0.9800 . ?
N4 C20 1.145(2) . ?
C20 C21 1.449(2) . ?
C21 H21A 0.9800 . ?
C21 H21B 0.9800 . ?
C21 H21C 0.9800 . ?
 
loop_
 _geom_angle_atom_site_label_1
 _geom_angle_atom_site_label_2
 _geom_angle_atom_site_label_3
 _geom_angle
 _geom_angle_site_symmetry_1
 _geom_angle_site_symmetry_3
 _geom_angle_publ_flag
C16 O2 C17 115.44(10) . . ?
N2 N1 C12 120.54(10) . . ?
N2 N1 C15 112.14(9) . . ?
C12 N1 C15 125.12(10) . . ?
N3 N2 N1 113.19(10) . . ?
N2 N3 C14 109.52(10) . . ?
C2 C1 C6 118.53(11) . . ?
C2 C1 H1 120.7 . . ?
C6 C1 H1 120.7 . . ?
C1 C2 C3 120.75(11) . . ?
C1 C2 H2 119.6 . . ?
C3 C2 H2 119.6 . . ?
C2 C3 C4 120.76(11) . . ?
C2 C3 H3 119.6 . . ?
C4 C3 H3 119.6 . . ?
C5 C4 C3 118.88(11) . . ?
C5 C4 H4 120.6 . . ?
C3 C4 H4 120.6 . . ?
C4 C5 C6 120.14(11) . . ?
C4 C5 C9 129.71(11) . . ?
C6 C5 C9 110.15(10) . . ?
C1 C6 C5 120.94(10) . . ?
C1 C6 C7 130.45(11) . . ?
C5 C6 C7 108.59(10) . . ?
C10 C7 C8 120.34(11) . . ?
C10 C7 C6 131.21(11) . . ?
C8 C7 C6 108.41(10) . . ?
C13 C8 C7 121.03(11) . . ?
C13 C8 C9 128.74(11) . . ?
C7 C8 C9 110.19(10) . . ?
C8 C9 C5 102.59(9) . . ?
C8 C9 H9A 111.2 . . ?
C5 C9 H9A 111.2 . . ?
C8 C9 H9B 111.2 . . ?
C5 C9 H9B 111.2 . . ?
H9A C9 H9B 109.2 . . ?
C11 C10 C7 119.13(11) . . ?
C11 C10 H10 120.4 . . ?
C7 C10 H10 120.4 . . ?
C10 C11 C12 119.99(11) . . ?
C10 C11 H11 120.0 . . ?
C12 C11 H11 120.0 . . ?
C13 C12 C11 121.20(11) . . ?
C13 C12 N1 119.93(11) . . ?
C11 C12 N1 118.86(11) . . ?
C8 C13 C12 118.25(11) . . ?
C8 C13 H13 120.9 . . ?
C12 C13 H13 120.9 . . ?
N3 C14 C19 108.81(10) . . ?
N3 C14 C15 105.31(9) . . ?
C19 C14 C15 113.10(11) . . ?
N3 C14 H14 109.8 . . ?
C19 C14 H14 109.8 . . ?
C15 C14 H14 109.8 . . ?
N1 C15 C16 110.13(9) . . ?
N1 C15 C14 99.34(9) . . ?
C16 C15 C14 110.72(9) . . ?
N1 C15 H15 112.0 . . ?
C16 C15 H15 112.0 . . ?
C14 C15 H15 112.0 . . ?
O1 C16 O2 126.56(11) . . ?
O1 C16 C15 122.85(11) . . ?
O2 C16 C15 110.58(10) . . ?
O2 C17 C18 107.22(11) . . ?
O2 C17 H17A 110.3 . . ?
C18 C17 H17A 110.3 . . ?
O2 C17 H17B 110.3 . . ?
C18 C17 H17B 110.3 . . ?
H17A C17 H17B 108.5 . . ?
C17 C18 H18A 109.5 . . ?
C17 C18 H18B 109.5 . . ?
H18A C18 H18B 109.5 . . ?
C17 C18 H18C 109.5 . . ?
H18A C18 H18C 109.5 . . ?
H18B C18 H18C 109.5 . . ?
F2 C19 F1 107.16(10) . . ?
F2 C19 F3 107.50(10) . . ?
F1 C19 F3 107.48(12) . . ?
F2 C19 C14 111.36(12) . . ?
F1 C19 C14 112.16(10) . . ?
F3 C19 C14 110.95(11) . . ?
N4 C20 C21 179.76(18) . . ?
C20 C21 H21A 109.5 . . ?
C20 C21 H21B 109.5 . . ?
H21A C21 H21B 109.5 . . ?
C20 C21 H21C 109.5 . . ?
H21A C21 H21C 109.5 . . ?
H21B C21 H21C 109.5 . . ?
 
_refine_diff_density_max    0.416
_refine_diff_density_min   -0.335
_refine_diff_density_rms    0.070

_shelxl_version_number 2014/6

_shelx_res_file
;
TITL cu_gg1403sa in P2(1)/c
CELL 1.54178  22.12680   5.36110  16.77530  90.0000 101.5204  90.0000
ZERR    4.00   0.00060   0.00010   0.00040   0.0000   0.0009   0.0000
LATT 1
SYMM -X, 1/2+Y, 1/2-Z
SFAC C  H  N  O  F
UNIT 84  76  16  8  12
L.S. 10
SHEL 999 0.81
ACTA
BOND $H
FMAP 2
PLAN 5
size .4 .2 .06
TEMP -173
WGHT    0.059000    0.936900
FVAR       0.13242
F1    5    0.097518    0.464780    0.498447    11.00000    0.02567    0.04450 =
         0.02796   -0.01204   -0.00055    0.00111
F2    5    0.038376    0.736356    0.537785    11.00000    0.01669    0.04673 =
         0.03712   -0.00280   -0.00086    0.00595
F3    5    0.066068    0.408667    0.610631    11.00000    0.02611    0.04627 =
         0.04107    0.00624    0.00397   -0.01370
O1    4    0.249732    0.786392    0.755039    11.00000    0.02349    0.02522 =
         0.02019   -0.00382    0.00389   -0.00554
O2    4    0.210959    0.409585    0.777407    11.00000    0.02576    0.02285 =
         0.01675    0.00018    0.00387   -0.00219
N1    3    0.238961    0.635909    0.591454    11.00000    0.01637    0.02144 =
         0.01649    0.00237    0.00405    0.00167
N2    3    0.217082    0.839307    0.547562    11.00000    0.01846    0.02410 =
         0.02274    0.00427    0.00246    0.00234
N3    3    0.163109    0.896876    0.554049    11.00000    0.01853    0.02709 =
         0.02872    0.00520    0.00523    0.00324
C1    1    0.535850    0.264101    0.681540    11.00000    0.01960    0.01680 =
         0.01442   -0.00007    0.00269    0.00074
AFIX  43
H1    2    0.522796    0.127566    0.710015    11.00000   -1.20000
AFIX   0
C2    1    0.598078    0.301002    0.681341    11.00000    0.01791    0.01954 =
         0.01765   -0.00053    0.00059    0.00388
AFIX  43
H2    2    0.627823    0.188255    0.709934    11.00000   -1.20000
AFIX   0
C3    1    0.617246    0.501399    0.639686    11.00000    0.01632    0.02186 =
         0.02165   -0.00283    0.00357   -0.00024
AFIX  43
H3    2    0.659933    0.524286    0.640452    11.00000   -1.20000
AFIX   0
C4    1    0.574420    0.669057    0.596808    11.00000    0.01994    0.01722 =
         0.01949   -0.00018    0.00490   -0.00072
AFIX  43
H4    2    0.587617    0.805044    0.568230    11.00000   -1.20000
AFIX   0
C5    1    0.512107    0.633549    0.596655    11.00000    0.01943    0.01457 =
         0.01488   -0.00229    0.00278    0.00149
C6    1    0.493066    0.432033    0.639003    11.00000    0.01746    0.01536 =
         0.01289   -0.00276    0.00270    0.00055
C7    1    0.425769    0.443477    0.630343    11.00000    0.01723    0.01514 =
         0.01260   -0.00206    0.00193    0.00182
C8    1    0.403935    0.652703    0.582561    11.00000    0.01909    0.01464 =
         0.01341   -0.00241    0.00285    0.00060
C9    1    0.456781    0.784539    0.555639    11.00000    0.01793    0.01460 =
         0.01757    0.00104    0.00362    0.00176
AFIX  23
H9A   2    0.460082    0.960053    0.574351    11.00000   -1.20000
H9B   2    0.452040    0.780645    0.495706    11.00000   -1.20000
AFIX   0
C10   1    0.385149    0.294016    0.662460    11.00000    0.01970    0.01522 =
         0.01577   -0.00076    0.00303    0.00112
AFIX  43
H10   2    0.399717    0.151011    0.693936    11.00000   -1.20000
AFIX   0
C11   1    0.322869    0.356676    0.647888    11.00000    0.01814    0.01840 =
         0.01720   -0.00141    0.00510   -0.00145
AFIX  43
H11   2    0.294536    0.255053    0.668909    11.00000   -1.20000
AFIX   0
C12   1    0.301934    0.569936    0.602150    11.00000    0.01595    0.01942 =
         0.01408   -0.00378    0.00142    0.00177
C13   1    0.342202    0.717860    0.568145    11.00000    0.01878    0.01674 =
         0.01474   -0.00061    0.00216    0.00233
AFIX  43
H13   2    0.327588    0.859465    0.535970    11.00000   -1.20000
AFIX   0
C14   1    0.141039    0.718961    0.610213    11.00000    0.01660    0.02574 =
         0.01906   -0.00089    0.00394    0.00142
AFIX  13
H14   2    0.129558    0.812124    0.656654    11.00000   -1.20000
AFIX   0
C15   1    0.196359    0.546336    0.641863    11.00000    0.01415    0.02065 =
         0.01853   -0.00148    0.00385   -0.00076
AFIX  13
H15   2    0.185616    0.366429    0.631615    11.00000   -1.20000
AFIX   0
C16   1    0.222925    0.597712    0.731653    11.00000    0.01363    0.02129 =
         0.01792   -0.00095    0.00447    0.00142
C17   1    0.233277    0.440395    0.865151    11.00000    0.03868    0.02652 =
         0.01519   -0.00026    0.00357    0.00097
AFIX  23
H17A  2    0.212416    0.583416    0.885477    11.00000   -1.20000
H17B  2    0.278276    0.471738    0.877127    11.00000   -1.20000
AFIX   0
C18   1    0.218943    0.203138    0.905316    11.00000    0.03724    0.02744 =
         0.02251    0.00405    0.01029    0.00557
AFIX 137
H18A  2    0.239991    0.063263    0.884889    11.00000   -1.50000
H18B  2    0.174319    0.174099    0.892926    11.00000   -1.50000
H18C  2    0.233170    0.217314    0.964329    11.00000   -1.50000
AFIX   0
C19   1    0.085460    0.581059    0.563712    11.00000    0.01638    0.03409 =
         0.02517   -0.00098    0.00312    0.00029
N4    3    0.916634    0.366671    0.725664    11.00000    0.04986    0.04608 =
         0.03570    0.00179    0.01620    0.00395
C20   1    0.928487    0.199748    0.689011    11.00000    0.02804    0.03759 =
         0.02854    0.00697    0.00710   -0.00167
C21   1    0.943534   -0.010734    0.642371    11.00000    0.03730    0.03623 =
         0.04274   -0.00252    0.00532    0.00060
AFIX 137
H21A  2    0.986539    0.002454    0.636213    11.00000   -1.50000
H21B  2    0.916342   -0.010936    0.588542    11.00000   -1.50000
H21C  2    0.937897   -0.166047    0.670820    11.00000   -1.50000
AFIX   0
HKLF 4

REM  cu_gg1403sa in P2(1)/c
REM R1 =  0.0376 for    3712 Fo > 4sig(Fo)  and  0.0385 for all    3824 data
REM    273 parameters refined using      0 restraints

END

WGHT      0.0520      0.9454

REM Highest difference peak  0.416,  deepest hole -0.335,  1-sigma level  0.070
Q1    1   0.2084  0.5746  0.6882  11.00000  0.05    0.42
Q2    1   0.1505  0.8129  0.4608  11.00000  0.05    0.36
Q3    1   0.2307  0.3161  0.8898  11.00000  0.05    0.32
Q4    1   0.4283  0.7347  0.5659  11.00000  0.05    0.32
Q5    1   0.1696  0.6256  0.6300  11.00000  0.05    0.29
;
_shelx_res_checksum   68998

_shelx_hkl_file
;
   0   0   1    0.00    0.00
   0   0  -1    0.00    0.00
   0   0   2   12.67    0.73
   0   0  -2   15.32    0.73
   0   0  -4  330.43   17.18
   0   0   6   74.88    3.85
   0   0   6   79.54    2.44
   0   0  -6   79.69    3.90
   0   0  -6   78.39    2.42
   0   0   6   76.75    2.28
   0   0  -6   77.13    2.54
   0   0  -7    0.01    0.01
   0   0   7    0.03    0.01
   0   0  -7    0.00    0.01
   0   0   7    0.02    0.01
   0   0  -7    0.01    0.01
   0   0  -8   24.96    0.82
   0   0  -8   24.93    0.77
   0   0   8   26.25    0.77
   0   0  -8   25.83    0.84
   0   0   9    0.00    0.01
   0   0  -9    0.01    0.01
   0   0  -9    0.01    0.01
   0   0  -9    0.02    0.01
   0   0 -10    5.75    0.20
   0   0  10    5.49    0.20
   0   0 -10    5.61    0.20
   0   0 -10    5.60    0.21
   0   0  11    0.01    0.02
   0   0 -11   -0.01    0.01
   0   0 -11    0.01    0.01
   0   0 -12    0.09    0.02
   0   0 -12    0.11    0.03
   0   0 -12    0.14    0.02
   0   0  12    0.12    0.03
   0   0 -13    0.02    0.02
   0   0 -13    0.00    0.02
   0   0 -13    0.04    0.02
   0   0 -14    0.35    0.04
   0   0 -14    0.24    0.03
   0   0 -14    0.29    0.05
   0   0  15    0.01    0.02
   0   0  15    0.00    0.02
   0   0  15    0.00    0.01
   0   0  15    0.01    0.02
   0   0 -15    0.03    0.02
   0   0  15   -0.01    0.02
   0   0  15    0.00    0.01
   0   0  16    0.04    0.02
   0   0 -16    0.06    0.02
   0   0  16    0.04    0.02
   0   0  16    0.07    0.02
   0   0  16    0.09    0.02
   0   0  16    0.07    0.02
   0   0  17    0.00    0.01
   0   0  17    0.00    0.02
   0   0  17    0.00    0.02
   0   0  17    0.00    0.01
   0   0  17    0.01    0.02
   0   0 -17    0.00    0.01
   0   0  18    0.03    0.02
   0   0  18    0.04    0.02
   0   0  18    0.01    0.01
   0   0  18    0.02    0.02
   0   0 -18    0.02    0.02
   0   0  18    0.01    0.01
   0   0  19    0.01    0.01
   0   0  19    0.00    0.01
   0   0  19    0.01    0.01
   0   0  19    0.01    0.01
   0   0  19    0.01    0.01
   0   0  20    5.01    0.15
   0   0  20    5.07    0.12
   0   0  20    5.34    0.15
   0   0  20    5.12    0.15
   0   0  20    5.07    0.12
   0   1   0   -0.03    0.01
   0  -1   0   -0.03    0.01
   0  -1   0    0.00    0.01
   0   1   1  285.68   15.14
   0  -1  -1  285.23   15.24
   0  -1   1  277.10   14.68
   0  -1   1  282.87   14.76
   0   1   2  122.96    7.01
   0  -1   2  120.08    6.42
   0  -1  -2  112.53    6.00
   0  -1   2  123.52    6.46
   0   1  -3   55.43    2.60
   0   1   3   54.17    3.51
   0   1   3   47.56    2.59
   0  -1  -3   51.13    2.59
   0  -1  -3   49.58    2.59
   0  -1   3   55.24    2.84
   0   1   4  907.71   22.01
   0   1   4  805.35   28.48
   0   1   4  793.42   26.72
   0   1   4  907.71   22.01
   0   1  -4 1000.00   44.07
   0  -1  -4  780.79   45.41
   0  -1   4  985.49   44.00
   0   1   5   83.18    1.99
   0   1   5   83.18    1.99
   0   1  -5   82.00    2.78
   0   1   5   84.06    2.65
   0   1  -5   88.39    2.52
   0   1   5   86.17    2.51
   0  -1  -5   84.89    4.23
   0   1  -6   15.64    0.52
   0   1   6   16.24    0.40
   0   1  -6   15.77    0.50
   0   1   6   15.81    0.49
   0   1   6   16.24    0.40
   0   1   6   16.60    0.53
   0   1  -6   15.94    0.54
   0  -1  -6   16.28    0.40
   0  -1  -6   16.28    0.40
   0  -1  -6   15.85    0.53
   0  -1  -6   16.10    0.84
   0   1  -7   28.64    0.99
   0   1   7   30.45    0.96
   0   1   7   31.14    0.90
   0   1  -7   30.05    0.91
   0   1   7   30.44    0.72
   0   1   7   30.44    0.72
   0   1  -7   30.19    0.95
   0  -1  -7   29.70    0.98
   0  -1  -7   29.14    0.72
   0  -1  -7   29.14    0.72
   0   1   8   32.10    0.95
   0   1  -8   31.77    0.95
   0   1   8   31.58    0.76
   0   1  -8   33.55    1.04
   0   1   8   31.78    1.01
   0   1   8   31.58    0.76
   0  -1  -8   29.86    0.76
   0  -1  -8   29.86    0.76
   0  -1  -8   31.01    1.03
   0   1   9   55.30    1.69
   0   1  -9   53.49    1.76
   0   1   9   51.64    1.27
   0   1  -9   54.39    1.60
   0   1   9   54.47    1.59
   0   1   9   51.64    1.27
   0  -1  -9   52.00    1.27
   0  -1  -9   55.56    1.69
   0  -1  -9   52.00    1.27
   0  -1  -9   53.72    1.74
   0   1 -10    0.28    0.04
   0   1 -10    0.35    0.04
   0   1  10    0.29    0.04
   0   1 -10    0.25    0.03
   0   1  10    0.31    0.04
   0  -1 -10    0.32    0.04
   0   1  11   16.90    0.56
   0   1 -11   16.71    0.57
   0   1  11   16.81    0.53
   0   1 -11   16.32    0.53
   0   1 -11   15.76    0.53
   0  -1 -11   16.00    0.55
   0  -1 -11   16.48    0.55
   0   1 -12    1.62    0.09
   0   1 -12    1.54    0.08
   0   1  12    1.53    0.09
   0   1 -12    1.61    0.09
   0  -1 -12    1.61    0.07
   0  -1 -12    1.44    0.08
   0   1  13    8.31    0.29
   0   1 -13    8.13    0.31
   0   1 -13    7.96    0.30
   0   1 -13    8.51    0.29
   0  -1 -13    8.26    0.29
   0  -1 -13    7.98    0.29
   0  -1 -13    7.82    0.30
   0   1 -14    0.23    0.04
   0   1  14    0.25    0.04
   0   1 -14    0.28    0.04
   0   1 -14    0.27    0.05
   0  -1 -14    0.25    0.04
   0  -1 -14    0.25    0.03
   0   1  15    0.17    0.03
   0   1  15    0.21    0.03
   0   1  15    0.20    0.03
   0   1 -15    0.26    0.04
   0   1  15    0.20    0.03
   0  -1  15    0.37    0.05
   0  -1  15    0.19    0.03
   0  -1  15    0.22    0.03
   0  -1  15    0.21    0.03
   0  -1  15    0.26    0.03
   0  -1  15    0.19    0.03
   0  -1 -15    0.24    0.03
   0   1  16    0.74    0.05
   0   1  16    0.74    0.05
   0   1 -16    0.88    0.06
   0   1  16    0.88    0.06
   0   1  16    0.77    0.05
   0  -1  16    0.79    0.05
   0  -1  16    0.70    0.05
   0  -1  16    0.79    0.04
   0  -1  16    0.76    0.06
   0  -1 -16    0.79    0.05
   0  -1  16    0.79    0.04
   0  -1  16    0.73    0.05
   0   1 -17    0.49    0.04
   0   1  17    0.42    0.04
   0   1  17    0.50    0.04
   0   1  17    0.52    0.04
   0  -1  17    0.47    0.04
   0  -1  17    0.51    0.04
   0  -1  17    0.42    0.03
   0  -1 -17    0.44    0.04
   0  -1  17    0.42    0.03
   0  -1  17    0.47    0.04
   0  -1  17    0.46    0.04
   0   1  18   10.11    0.30
   0   1  18    9.98    0.30
   0   1  18   10.71    0.30
   0  -1  18    9.91    0.23
   0  -1  18    9.91    0.23
   0  -1  18   10.14    0.30
   0  -1  18   10.14    0.30
   0  -1  18    9.90    0.29
   0  -1  18    9.89    0.32
   0   1  19    0.11    0.02
   0   1  19    0.12    0.02
   0   1  19    0.09    0.02
   0  -1  19    0.13    0.02
   0  -1  19    0.14    0.02
   0  -1  19    0.12    0.02
   0  -1  19    0.13    0.02
   0  -1  19    0.11    0.02
   0  -1  19    0.13    0.02
   0  -1  20    0.09    0.01
   0  -1  20    0.09    0.01
   0  -1  20    0.09    0.01
   0  -1  20    0.08    0.01
   0  -1  20    0.09    0.01
   0   2   0   22.86    0.55
   0   2   0   22.86    0.55
   0   2   0   22.58    0.70
   0   2   0   23.75    0.74
   0  -2   0   22.87    1.17
   0  -2   0   22.77    0.77
   0   2  -1   29.51    0.87
   0   2   1   28.05    0.92
   0   2  -1   27.86    0.91
   0   2   1   31.94    0.87
   0   2   1   28.22    0.69
   0   2   1   28.22    0.69
   0  -2   1   27.66    1.45
   0  -2  -1   27.86    1.46
   0  -2  -1   29.34    0.95
   0  -2   1   28.95    1.45
   0   2   2    0.15    0.02
   0   2   2    0.16    0.05
   0   2  -2    0.15    0.02
   0   2   2    0.15    0.02
   0   2  -2    0.17    0.02
   0  -2  -2    0.17    0.04
   0  -2   2    0.14    0.03
   0  -2  -2    0.16    0.02
   0   2   3   43.09    1.03
   0   2   3   44.13    1.28
   0   2  -3   42.94    1.28
   0   2   3   45.14    1.36
   0   2  -3   40.64    1.35
   0   2   3   43.09    1.03
   0  -2  -3   41.66    1.41
   0   2   4   38.91    0.90
   0   2   4   38.91    0.90
   0   2  -4   37.52    1.12
   0   2  -4   36.33    1.18
   0   2   4   37.62    1.19
   0   2   4   37.67    1.12
   0  -2  -4   34.43    1.23
   0   2   5    5.68    0.21
   0   2   5    5.52    0.16
   0   2  -5    5.41    0.21
   0   2   5    5.52    0.16
   0   2   5    5.86    0.20
   0   2  -5    5.63    0.20
   0  -2  -5    5.66    0.20
   0   2   6   22.05    0.67
   0   2  -6   22.37    0.74
   0   2   6   21.66    0.54
   0   2   6   21.66    0.54
   0   2   6   22.53    0.72
   0   2  -6   21.21    0.68
   0  -2  -6   20.98    0.72
   0   2   7   29.69    0.71
   0   2  -7   29.64    0.98
   0   2  -7   29.75    0.90
   0   2   7   29.32    0.88
   0   2   7   28.76    0.94
   0   2   7   29.69    0.71
   0  -2  -7   27.86    0.71
   0  -2  -7   29.05    0.96
   0  -2  -7   27.86    0.71
   0   2   8  124.73    3.56
   0   2   8  121.81    2.85
   0   2  -8  114.69    3.71
   0   2  -8  116.28    3.95
   0   2   8  122.89    3.79
   0   2  -8  121.72    3.58
   0   2   8  121.81    2.85
   0  -2  -8  121.14    2.85
   0  -2  -8  121.14    2.85
   0  -2  -8  123.61    3.98
   0   2  -9   88.21    2.56
   0   2   9   82.32    2.46
   0   2   9   83.63    1.97
   0   2  -9   80.98    2.73
   0   2   9   80.63    2.62
   0   2  -9   83.71    2.48
   0   2   9   83.63    1.97
   0  -2  -9   82.64    1.97
   0  -2  -9   82.06    2.70
   0  -2  -9   82.64    1.97
   0   2 -10    0.02    0.02
   0   2 -10    0.04    0.02
   0   2  10    0.04    0.02
   0   2  10    0.10    0.02
   0   2  10    0.10    0.02
   0   2  10    0.00    0.01
   0   2 -10   -0.01    0.01
   0  -2 -10    0.02    0.01
   0  -2 -10    0.07    0.02
   0  -2 -10    0.02    0.01
   0   2 -11    1.77    0.11
   0   2 -11    1.54    0.10
   0   2  11    1.78    0.10
   0   2 -11    1.73    0.09
   0   2  11    1.70    0.09
   0  -2 -11    2.03    0.08
   0  -2 -11    1.58    0.07
   0  -2 -11    1.58    0.07
   0  -2 -11    1.59    0.10
   0   2 -12    8.38    0.31
   0   2 -12    8.91    0.35
   0   2 -12    8.88    0.33
   0   2  12    9.01    0.33
   0   2  12    8.84    0.31
   0  -2 -12    8.50    0.33
   0  -2 -12    8.73    0.31
   0   2 -13   31.99    0.98
   0   2 -13   29.11    0.97
   0   2  13   30.07    0.95
   0   2  13   29.97    1.01
   0   2 -13   31.56    1.06
   0  -2 -13   30.63    1.01
   0  -2 -13   29.92    1.01
   0   2 -14   48.16    1.55
   0   2  14   48.88    1.35
   0   2  14   50.03    1.29
   0   2  14   48.50    1.35
   0  -2  14   50.72    1.47
   0  -2  14   51.08    1.35
   0  -2  14   47.76    1.35
   0  -2  14   49.68    1.06
   0  -2  14   48.74    1.33
   0  -2  14   49.68    1.06
   0   2 -15    3.64    0.16
   0   2  15    3.46    0.13
   0   2  15    3.67    0.13
   0   2  15    3.58    0.14
   0  -2  15    3.67    0.13
   0  -2 -15    3.67    0.14
   0  -2  15    3.58    0.13
   0  -2  15    3.67    0.15
   0  -2  15    3.52    0.10
   0  -2  15    3.57    0.13
   0  -2  15    3.52    0.10
   0   2 -16    0.33    0.04
   0   2  16    0.26    0.03
   0   2  16    0.37    0.04
   0   2  16    0.31    0.04
   0  -2  16    0.37    0.04
   0  -2 -16    0.37    0.04
   0  -2  16    0.41    0.04
   0  -2  16    0.38    0.04
   0  -2  16    0.36    0.03
   0  -2  16    0.36    0.03
   0  -2  16    0.32    0.04
   0   2  17    0.03    0.02
   0   2  17    0.06    0.02
   0   2  17    0.02    0.02
   0  -2  17    0.04    0.01
   0  -2  17    0.11    0.02
   0  -2  17    0.04    0.01
   0  -2  17    0.05    0.02
   0  -2  17    0.02    0.01
   0   2  18    0.62    0.04
   0   2  18    0.54    0.03
   0   2  18    0.61    0.04
   0  -2  18    0.64    0.04
   0  -2  18    0.57    0.03
   0  -2  18    0.60    0.04
   0  -2  18    0.61    0.04
   0  -2  18    0.62    0.04
   0  -2  18    0.57    0.03
   0   2  19    2.40    0.08
   0   2  19    2.39    0.08
   0  -2  19    2.47    0.08
   0  -2  19    2.43    0.08
   0  -2  19    2.45    0.06
   0  -2  19    2.37    0.09
   0  -2  19    2.45    0.06
   0   3   0    0.05    0.02
   0   3   0    0.00    0.01
   0   3   0    0.02    0.01
   0   3   0    0.02    0.01
   0   3   1    8.37    0.22
   0   3   1    7.79    0.29
   0   3  -1    7.73    0.29
   0   3  -1    7.96    0.28
   0   3   1    8.29    0.28
   0   3   1    8.37    0.22
   0  -3  -1    8.57    0.31
   0   3   2    2.74    0.12
   0   3   2    2.68    0.12
   0   3   2    2.68    0.09
   0   3   2    2.68    0.09
   0   3  -2    2.79    0.12
   0   3  -2    2.48    0.12
   0  -3  -2    2.74    0.12
   0   3   3   29.98    0.94
   0   3  -3   29.93    0.95
   0   3   3   30.60    0.76
   0   3   3   30.60    0.76
   0   3   3   31.86    1.00
   0  -3  -3   31.44    1.04
   0   3   4   25.63    0.64
   0   3  -4   25.13    0.80
   0   3   4   25.63    0.64
   0   3   4   26.56    0.80
   0   3   4   25.61    0.85
   0   3   5   36.31    0.87
   0   3   5   35.87    1.08
   0   3   5   36.31    0.87
   0   3   5   33.41    1.15
   0   3  -5   36.51    1.10
   0  -3  -5   33.82    1.11
   0  -3  -5   36.07    1.19
   0  -3  -5   35.64    0.87
   0  -3  -5   35.64    0.87
   0   3   6   12.64    0.33
   0   3   6   12.64    0.33
   0   3   6   11.89    0.40
   0   3  -6   12.70    0.42
   0   3   6   12.24    0.44
   0  -3  -6   12.21    0.33
   0  -3  -6   12.12    0.40
   0  -3  -6   12.21    0.33
   0  -3  -6   12.02    0.44
   0   3   7   12.31    0.34
   0   3   7   12.80    0.42
   0   3   7   12.93    0.45
   0   3   7   12.31    0.34
   0   3  -7   12.52    0.43
   0  -3  -7   12.96    0.34
   0  -3  -7   12.96    0.34
   0  -3  -7   12.80    0.45
   0  -3  -7   12.09    0.42
   0   3   8    5.80    0.18
   0   3  -8    5.63    0.23
   0   3   8    5.80    0.18
   0   3   8    5.98    0.22
   0   3   8    5.79    0.24
   0  -3  -8    5.79    0.21
   0  -3  -8    5.86    0.23
   0  -3  -8    5.61    0.18
   0  -3  -8    5.61    0.18
   0   3  -9    2.73    0.14
   0   3   9    2.82    0.11
   0   3   9    2.68    0.14
   0   3   9    2.82    0.11
   0   3   9    2.70    0.13
   0  -3  -9    3.12    0.11
   0  -3  -9    3.12    0.11
   0  -3  -9    2.52    0.12
   0  -3  -9    2.71    0.12
   0   3  10    6.08    0.26
   0   3 -10    6.14    0.26
   0   3  10    6.58    0.20
   0   3  10    6.64    0.24
   0   3  10    6.58    0.20
   0  -3 -10    6.45    0.20
   0  -3 -10    6.09    0.23
   0  -3 -10    6.45    0.20
   0  -3 -10    6.34    0.24
   0   3  11   13.92    0.46
   0   3  11   14.33    0.50
   0   3 -11   13.44    0.49
   0  -3 -11   14.06    0.38
   0  -3 -11   13.73    0.49
   0  -3 -11   13.65    0.46
   0  -3 -11   14.30    0.50
   0  -3 -11   14.06    0.38
   0   3  12    0.79    0.05
   0   3  12    0.86    0.06
   0  -3  12    0.77    0.06
   0  -3 -12    0.84    0.06
   0  -3  12    0.83    0.05
   0   3  13    3.82    0.14
   0   3  13    3.80    0.14
   0  -3  13    3.73    0.13
   0  -3 -13    3.92    0.16
   0  -3  13    4.10    0.16
   0  -3  13    3.76    0.13
   0   3  14    4.79    0.17
   0   3  14    4.91    0.16
   0  -3  14    4.93    0.16
   0  -3 -14    4.66    0.18
   0  -3  14    4.50    0.15
   0  -3  14    5.01    0.18
   0   3  15   15.95    0.44
   0   3  15   15.88    0.46
   0  -3  15   15.69    0.45
   0  -3  15   16.46    0.50
   0  -3 -15   15.81    0.52
   0  -3  15   15.52    0.45
   0   3  16    1.26    0.06
   0   3  16    1.18    0.06
   0  -3  16    1.18    0.05
   0  -3  16    1.22    0.06
   0  -3  16    1.21    0.05
   0   3  17    2.91    0.10
   0   3  17    2.99    0.09
   0  -3  17    2.99    0.11
   0  -3  17    2.82    0.10
   0  -3  17    2.83    0.09
   0  -3  18    0.54    0.03
   0   4   0    0.14    0.03
   0   4   1    1.18    0.08
   0   4  -1    1.09    0.08
   0   4   1    1.04    0.07
   0  -4  -1    0.99    0.06
   0   4  -2    0.20    0.04
   0   4   2    0.27    0.04
   0   4   2    0.27    0.04
   0  -4  -2    0.29    0.04
   0   4   3   18.27    0.60
   0   4   3   18.58    0.48
   0   4   3   19.05    0.64
   0   4   3   18.58    0.48
   0   4  -3   17.75    0.61
   0  -4  -3   18.28    0.60
   0  -4  -3   18.03    0.65
   0  -4  -3   18.51    0.48
   0  -4  -3   18.51    0.48
   0   4   4    0.46    0.06
   0   4   4    0.45    0.05
   0   4   4    0.45    0.06
   0   4   4    0.45    0.05
   0   4  -4    0.47    0.06
   0  -4  -4    0.57    0.07
   0  -4  -4    0.48    0.05
   0  -4  -4    0.48    0.05
   0  -4  -4    0.43    0.04
   0   4   5    1.21    0.09
   0   4   5    1.27    0.07
   0   4   5    1.20    0.08
   0   4  -5    1.23    0.09
   0   4   5    1.27    0.07
   0  -4  -5    1.27    0.07
   0  -4  -5    1.27    0.07
   0  -4  -5    1.20    0.07
   0  -4  -5    1.19    0.08
   0   4   6   30.26    0.76
   0   4   6   30.47    0.95
   0   4  -6   29.85    0.96
   0   4   6   30.26    0.76
   0  -4  -6   30.85    1.03
   0  -4  -6   29.43    0.76
   0  -4  -6   30.88    0.97
   0  -4  -6   29.43    0.76
   0   4  -7   12.67    0.44
   0   4   7   12.12    0.41
   0   4   7   11.75    0.44
   0  -4  -7   11.85    0.34
   0  -4  -7   12.02    0.44
   0  -4  -7   12.03    0.41
   0  -4  -7   11.85    0.34
   0   4   8    0.21    0.04
   0   4   8    0.17    0.03
   0   4  -8    0.20    0.05
   0   4   8    0.18    0.04
   0   4   8    0.17    0.03
   0   4   8    0.18    0.03
   0   4   8    0.19    0.03
   0  -4   8    0.19    0.03
   0  -4  -8    0.18    0.03
   0  -4  -8    0.17    0.03
   0  -4  -8    0.19    0.03
   0  -4  -8    0.18    0.03
   0   4   9    1.56    0.08
   0   4   9    1.64    0.08
   0  -4  -9    1.69    0.09
   0  -4   9    1.69    0.07
   0   4  10    3.66    0.13
   0   4  10    3.63    0.14
   0  -4  10    3.57    0.12
   0  -4 -10    3.68    0.15
   0   4  11   10.15    0.29
   0   4  11    9.63    0.30
   0  -4  11    9.40    0.28
   0  -4 -11    9.42    0.34
   0   4  12    0.03    0.02
   0   4  12    0.12    0.03
   0  -4 -12    0.05    0.02
   0  -4  12    0.06    0.02
   0   4  13    1.36    0.07
   0   4  13    1.38    0.06
   0  -4  13    1.34    0.06
   0  -4 -13    1.44    0.07
   0   4  14    0.12    0.02
   0   4  14    0.18    0.02
   0  -4  14    0.11    0.02
   0   4  15    2.65    0.09
   0   4  15    2.68    0.09
   0  -4  15    2.64    0.09
   0   4  16    9.60    0.26
   0  -4  16    9.72    0.27
   0   5   0    0.00    0.02
   0  -5   0    0.00    0.02
   0   5   1    0.80    0.05
   0  -5   1    0.65    0.05
   0  -5  -1    0.70    0.05
   0   5   2    0.47    0.04
   0   5   2    0.44    0.04
   0  -5  -2    0.47    0.04
   0  -5   2    0.47    0.04
   0   5   3    0.27    0.04
   0   5   3    0.25    0.03
   0  -5  -3    0.32    0.04
   0  -5   3    0.23    0.03
   0   5   4    0.81    0.05
   0   5   4    0.78    0.05
   0  -5  -4    0.69    0.05
   0  -5  -4    0.71    0.06
   0  -5   4    0.72    0.04
   0   5   5    1.69    0.08
   0   5   5    1.64    0.07
   0  -5  -5    1.70    0.09
   0  -5   5    1.65    0.07
   0  -5  -5    1.53    0.07
   0   5   6    0.36    0.04
   0   5   6    0.39    0.04
   0  -5  -6    0.48    0.05
   0  -5   6    0.44    0.03
   0   5   7    0.02    0.02
   0   5   7    0.03    0.02
   0  -5  -7    0.00    0.02
   0  -5   7    0.03    0.02
   0   5   8    2.76    0.11
   0   5   8    2.69    0.10
   0  -5   8    2.92    0.10
   0  -5  -8    2.94    0.13
   0   5   9    0.62    0.04
   0   5   9    0.54    0.04
   0  -5   9    0.56    0.04
   0  -5  -9    0.58    0.05
   0   5  10    2.35    0.09
   0   5  10    2.49    0.09
   0  -5  10    2.40    0.08
   0   5  11    0.76    0.04
   0   5  11    0.84    0.04
   0  -5  11    0.70    0.04
   0   5  12    4.89    0.15
   0   5  12    4.88    0.14
   0  -5  12    4.67    0.14
   0   5  13    0.27    0.02
   0  -5  13    0.26    0.02
   0  -6   0    2.72    0.09
   0  -6  -1    1.68    0.06
   0  -6   1    1.55    0.06
   0  -6   2    0.67    0.04
   0  -6  -2    0.72    0.04
   0  -6  -3    0.31    0.03
   0  -6   3    0.32    0.03
   0  -6   4    0.97    0.04
   0  -6  -4    0.77    0.04
   0   6   5    0.50    0.03
   0  -6  -5    0.52    0.03
   0  -6   5    0.53    0.03
   0   6   6    0.27    0.02
   0  -6  -6    0.27    0.02
   0  -6   6    0.28    0.02
   0   6   7    0.03    0.01
   0  -6   7    0.05    0.01
  -1   0  20    3.17    0.08
  -1   0  20    3.17    0.08
  -1   0  20    3.32    0.11
  -1   0  20    3.14    0.10
  -1   0  20    3.21    0.10
  -1   0  19   -0.01    0.01
  -1   0  19    0.01    0.01
  -1   0  19    0.01    0.01
  -1   0  19    0.00    0.01
  -1   0  19    0.00    0.01
  -1   0  18    0.66    0.05
  -1   0  18    0.77    0.05
   1   0 -18    0.81    0.05
  -1   0  18    0.84    0.04
  -1   0  18    0.89    0.05
  -1   0  18    0.84    0.04
  -1   0  17    0.05    0.02
  -1   0  17    0.02    0.01
  -1   0  17    0.00    0.02
  -1   0  17   -0.01    0.02
   1   0 -17    0.00    0.01
  -1   0  17    0.02    0.01
  -1   0  16    0.86    0.05
   1   0 -16    0.81    0.06
  -1   0  16    0.84    0.04
  -1   0  16    0.84    0.04
  -1   0  16    0.83    0.06
  -1   0  16    0.81    0.05
  -1   0  15    0.01    0.02
  -1   0  15    0.13    0.03
  -1   0  15    0.02    0.02
  -1   0  15    0.02    0.02
   1   0 -15    0.01    0.01
  -1   0  15    0.02    0.02
   1   0 -14    2.64    0.13
   1   0 -14    2.68    0.12
   1   0 -14    2.75    0.13
   1   0 -13    0.00    0.01
   1   0 -13    0.01    0.01
   1   0 -13    0.00    0.01
   1   0 -12   24.31    0.75
   1   0 -12   24.04    0.76
   1   0 -12   24.23    0.81
  -1   0  12   23.69    0.75
   1   0 -11    0.00    0.01
  -1   0  11   -0.01    0.01
   1   0 -11    0.00    0.01
   1   0 -11    0.02    0.01
   1   0 -11    0.02    0.01
   1   0 -10    7.70    0.27
   1   0 -10    7.39    0.27
  -1   0  10    7.73    0.26
   1   0 -10    7.58    0.26
   1   0  -9    0.00    0.01
   1   0  -9    0.01    0.01
  -1   0   9    0.00    0.01
   1   0  -9    0.00    0.01
  -1   0   8   66.18    1.91
   1   0  -8   64.10    2.02
   1   0  -8   63.72    1.91
   1   0  -8   64.10    2.10
   1   0  -7   -0.02    0.01
   1   0  -7   -0.01    0.01
   1   0  -7   -0.01    0.01
   1   0  -7   -0.01    0.01
  -1   0   7   -0.01    0.01
  -1   0   7   -0.02    0.01
   1   0  -6    0.28    0.02
  -1   0   6    0.31    0.02
   1   0  -6    0.28    0.03
   1   0  -6    0.35    0.02
  -1   0   5   -0.03    0.01
  -1   0   5   -0.02    0.01
   1   0  -5   -0.03    0.01
  -1   0   4  497.86   25.65
  -1   0   3   -0.11    0.01
   1   0  -3   -0.12    0.01
   1   0  -2  236.65   12.22
  -1   0   1   -0.05    0.01
   1   0   0    0.07    0.01
   1   0   2   46.87    2.62
  -1   0  -2   46.40    2.68
  -1   0  -2   44.95    2.31
  -1   0  -3   -0.17    0.01
  -1   0  -3   -0.16    0.01
   1   0   3   -0.17    0.01
   1   0   4    4.50    0.25
  -1   0  -4    4.76    0.25
  -1   0  -4    4.55    0.25
   1   0   5    0.03    0.01
  -1   0  -5    0.05    0.02
  -1   0  -5    0.00    0.01
  -1   0  -6    0.11    0.01
  -1   0  -7    0.01    0.01
  -1   0  -7    0.02    0.01
  -1   0  -7   -0.01    0.00
   1   0   7    0.01    0.01
   1   0   7    0.03    0.01
   1   0   8    0.74    0.05
  -1   0  -8    0.75    0.05
  -1   0  -8    0.77    0.04
   1   0   8    0.76    0.05
  -1   0  -8    0.88    0.05
  -1   0  -9    0.00    0.01
  -1   0  -9    0.00    0.01
  -1   0  -9    0.04    0.02
   1   0   9    0.03    0.02
  -1   0 -10   15.84    0.56
   1   0  10   17.44    0.53
  -1   0 -10   16.98    0.53
  -1   0 -11   -0.01    0.01
   1   0  11    0.00    0.01
  -1   0 -11    0.01    0.01
  -1   0 -12    4.11    0.17
   1   0  12    3.93    0.17
  -1   0 -12    4.27    0.16
  -1   0 -13    0.01    0.01
  -1   0 -13    0.01    0.02
  -1   0 -13    0.01    0.01
  -1   0 -14    0.10    0.02
  -1   0 -14    0.07    0.02
  -1   0 -14    0.05    0.03
   1   0  15   -0.01    0.02
   1   0  15    0.01    0.01
   1   0  15    0.01    0.02
  -1   0 -15    0.02    0.02
   1   0  15    0.01    0.02
   1   0  15    0.01    0.01
   1   0  15    0.01    0.02
  -1   0 -16    1.76    0.09
   1   0  16    1.87    0.09
   1   0  16    1.98    0.09
   1   0  16    1.81    0.08
   1   0  16    1.96    0.07
   1   0  16    1.96    0.07
  -1   0 -17    0.01    0.01
   1   0  17    0.00    0.02
   1   0  17   -0.01    0.02
   1   0  17   -0.01    0.01
   1   0  17   -0.01    0.01
   1   0  17   -0.01    0.02
   1   0  18   16.80    0.47
   1   0  18   16.62    0.37
   1   0  18   16.30    0.47
   1   0  18   16.77    0.47
   1   0  18   16.63    0.37
   1   0  19    0.01    0.01
   1   0  19    0.04    0.01
   1   0  19    0.01    0.01
   1   0  19    0.01    0.01
   1   0  19    0.02    0.01
   1   0  20    0.92    0.04
   1   0  20    0.96    0.04
   1   0  20    0.92    0.04
  -1   1  20    0.56    0.03
  -1   1  20    0.56    0.03
  -1   1  20    0.52    0.03
  -1  -1  20    0.58    0.03
  -1  -1  20    0.56    0.02
  -1  -1  20    0.56    0.02
  -1  -1  20    0.59    0.03
  -1  -1  20    0.56    0.03
  -1   1  19    2.92    0.10
  -1   1  19    2.98    0.10
  -1   1  19    3.01    0.10
  -1  -1  19    3.16    0.10
  -1  -1  19    2.93    0.10
  -1  -1  19    2.95    0.10
  -1  -1  19    3.03    0.08
  -1  -1  19    3.03    0.08
  -1  -1  19    3.00    0.11
  -1   1  18    0.38    0.04
  -1   1  18    0.42    0.03
  -1   1  18    0.43    0.04
  -1   1  18    0.44    0.04
  -1  -1  18    0.42    0.04
  -1  -1  18    0.46    0.03
  -1  -1  18    0.44    0.04
  -1  -1  18    0.34    0.03
  -1  -1  18    0.46    0.03
  -1  -1  18    0.43    0.04
  -1   1  17    7.66    0.24
  -1   1  17    7.61    0.24
  -1   1  17    8.00    0.24
  -1   1  17    7.89    0.23
   1   1 -17    7.82    0.28
  -1  -1  17    7.58    0.24
  -1  -1  17    7.85    0.19
  -1  -1  17    7.55    0.24
  -1  -1  17    7.58    0.24
  -1  -1  17    7.85    0.19
   1  -1 -17    7.82    0.27
  -1  -1  17    7.44    0.26
   1   1 -16   13.60    0.43
  -1   1  16   12.30    0.37
  -1   1  16   12.35    0.37
  -1   1  16   12.92    0.36
  -1   1  16   12.38    0.38
  -1  -1  16   12.86    0.41
  -1  -1  16   12.43    0.37
  -1  -1  16   12.33    0.37
   1  -1 -16   11.98    0.42
  -1  -1  16   12.82    0.30
  -1  -1  16   12.01    0.37
  -1  -1  16   12.82    0.30
   1   1 -15    4.79    0.19
  -1   1  15    4.74    0.17
  -1   1  15    4.69    0.16
  -1   1  15    4.57    0.16
  -1   1  15    4.66    0.17
  -1  -1  15    4.54    0.16
  -1  -1  15    4.72    0.13
  -1  -1  15    4.72    0.16
  -1  -1  15    4.83    0.18
  -1  -1  15    4.72    0.13
   1  -1 -15    4.56    0.18
  -1  -1  15    4.77    0.17
   1   1 -14    1.98    0.12
   1   1 -14    2.04    0.10
   1   1 -14    1.98    0.11
  -1   1  14    2.35    0.12
   1  -1 -14    2.08    0.10
   1  -1 -14    2.04    0.09
   1  -1 -14    2.05    0.11
   1   1 -13    0.55    0.05
   1   1 -13    0.53    0.07
   1   1 -13    0.60    0.05
  -1   1  13    0.60    0.05
   1  -1 -13    0.59    0.04
   1  -1 -13    0.59    0.05
   1  -1 -13    0.59    0.05
   1  -1 -13    0.59    0.04
   1   1 -12    0.44    0.05
   1   1 -12    0.48    0.06
  -1   1  12    0.50    0.05
   1   1 -12    0.49    0.04
   1  -1 -12    0.51    0.04
   1  -1 -12    0.46    0.05
   1  -1 -12    0.45    0.04
   1   1 -11   10.71    0.36
   1   1 -11    9.66    0.35
   1   1 -11   10.87    0.38
  -1   1  11   10.31    0.35
  -1   1  11   10.68    0.37
   1  -1 -11   10.73    0.36
   1  -1 -11   10.45    0.37
   1   1 -10   13.07    0.44
   1   1 -10   13.78    0.48
   1   1 -10   13.98    0.45
  -1   1  10   13.51    0.46
  -1   1  10   13.77    0.44
   1  -1 -10   13.40    0.46
   1  -1 -10   13.60    0.46
   1   1  -9   17.67    0.57
   1   1  -9   16.70    0.55
  -1   1   9   16.41    0.55
  -1   1   9   16.70    0.52
   1   1  -9   16.51    0.52
   1  -1  -9   16.07    0.41
   1  -1  -9   15.99    0.54
   1  -1  -9   16.07    0.41
   1  -1  -9   15.89    0.55
   1   1  -8  163.55    4.98
  -1   1   8  163.51    5.03
  -1   1   8  168.08    4.03
  -1   1   8  168.08    4.03
   1   1  -8  165.64    5.58
  -1   1   8  169.04    5.35
   1   1  -8  159.35    5.28
   1  -1  -8  195.96    4.01
   1  -1  -8  163.25    5.53
   1  -1  -8  195.96    4.01
   1  -1  -8  156.03    5.32
  -1   1   7   86.76    2.00
  -1   1   7   86.76    2.00
   1   1  -7   78.05    2.77
  -1   1   7   87.56    2.50
  -1   1   7   87.37    2.66
   1   1  -7   84.50    2.65
   1   1  -7   84.84    2.51
   1  -1  -7   85.27    2.00
   1  -1  -7   83.89    2.78
   1  -1  -7   85.27    2.00
  -1   1   6  100.38    2.27
  -1   1   6  100.38    2.27
   1   1  -6   89.00    3.00
  -1   1   6   94.97    2.82
   1   1  -6   95.26    2.82
   1   1  -6   99.09    3.15
   1  -1  -6   93.69    2.25
   1  -1  -6   96.75    4.79
   1  -1  -6   93.69    2.25
   1  -1  -6   96.69    3.13
  -1   1   5   -0.02    0.01
   1   1  -5    0.00    0.01
   1   1  -5    0.07    0.02
  -1   1   5   -0.02    0.01
  -1   1   5    0.00    0.01
   1  -1  -5    0.01    0.01
   1  -1  -5   -0.01    0.01
   1  -1  -5    0.01    0.01
   1  -1  -5    0.01    0.02
  -1   1   4  194.88    4.53
  -1   1   4  190.22    5.98
  -1   1   4  196.85    5.64
  -1   1   4  180.73   12.30
   1   1  -4  191.96   10.16
  -1   1   4  194.88    4.53
  -1  -1   4  192.77   10.07
   1  -1  -4  182.91    9.53
  -1   1   3  207.49   12.43
   1   1  -3  229.65   11.41
   1  -1  -3  201.10   12.44
  -1  -1   3  219.72   11.18
  -1   1   2    0.61    0.06
  -1   1   2    0.64    0.05
   1   1  -2    0.66    0.05
   1  -1  -2    0.63    0.05
   1   1  -1   56.36    3.03
  -1   1   1   62.27    3.03
  -1  -1   1   62.04    3.02
  -1   1   0  145.94    8.11
   1   1   0  157.18    7.34
  -1  -1   0  152.17    7.33
   1  -1   0  132.12    7.30
   1   1   1  205.65   10.56
  -1   1  -1  208.50   11.16
   1  -1   1  246.42   11.28
  -1  -1  -1  190.91   10.55
  -1  -1  -1  212.98   10.57
   1   1   2   15.97    0.96
   1  -1   2   16.27    0.81
  -1  -1  -2   16.31    0.83
   1  -1   2   16.28    0.80
   1   1   3   60.79    4.06
   1   1   3   60.73    3.07
  -1  -1  -3   60.68    3.07
  -1  -1  -3   64.62    3.10
  -1   1  -4   -0.01    0.01
   1   1   4    0.01    0.02
   1   1   4   -0.01    0.01
   1   1   4    0.00    0.01
   1   1   4    0.00    0.01
   1   1   4    0.01    0.01
  -1  -1  -4   -0.02    0.02
   1   1   5  113.48    2.85
  -1   1  -5  119.37    3.98
   1   1   5  134.82    3.59
  -1   1  -5  112.17    3.59
   1   1   5  113.48    2.85
   1   1   5  140.82    3.85
  -1  -1  -5  113.59    3.92
   1   1   6   30.65    0.97
  -1   1  -6   30.93    0.91
   1   1   6   30.20    0.73
   1   1   6   30.20    0.73
   1   1   6   30.36    0.91
  -1   1  -6   30.30    1.00
  -1  -1  -6   29.57    1.54
   1   1   7   12.32    0.37
  -1   1  -7   11.79    0.38
  -1   1  -7   11.73    0.41
   1   1   7   12.01    0.30
   1   1   7   12.09    0.40
   1   1   7   12.01    0.30
  -1  -1  -7   11.89    0.30
  -1  -1  -7   11.89    0.30
  -1  -1  -7   11.59    0.39
  -1   1  -8   26.72    0.87
  -1   1  -8   25.44    0.79
   1   1   8   26.30    0.63
   1   1   8   26.86    0.84
   1   1   8   26.13    0.79
   1   1   8   26.30    0.63
  -1  -1  -8   25.47    0.63
  -1  -1  -8   25.60    0.85
  -1  -1  -8   25.47    0.63
  -1   1  -9    6.33    0.23
  -1   1  -9    6.40    0.24
   1   1   9    6.45    0.24
   1   1   9    6.41    0.22
  -1  -1  -9    6.38    0.22
  -1  -1  -9    6.31    0.23
  -1   1 -10    1.83    0.09
  -1   1 -10    1.82    0.09
  -1   1 -10    1.77    0.08
   1   1  10    1.71    0.09
   1   1  10    1.83    0.09
  -1  -1 -10    1.74    0.07
  -1  -1 -10    1.83    0.09
   1   1  11    1.82    0.10
  -1   1 -11    1.80    0.10
  -1   1 -11    1.75    0.09
  -1   1 -11    1.88    0.10
   1   1  11    1.83    0.09
  -1  -1 -11    1.95    0.08
  -1  -1 -11    1.85    0.10
  -1   1 -12    0.01    0.01
  -1   1 -12    0.03    0.02
   1   1  12    0.03    0.02
  -1   1 -12    0.01    0.01
  -1  -1 -12    0.01    0.02
  -1  -1 -12    0.01    0.01
  -1  -1 -12    0.10    0.03
  -1   1 -13    0.74    0.06
   1   1  13    0.70    0.06
  -1   1 -13    0.65    0.06
  -1   1 -13    0.74    0.06
  -1  -1 -13    0.78    0.05
  -1  -1 -13    0.77    0.06
  -1   1 -14   10.79    0.39
  -1   1 -14   10.56    0.36
   1   1  14    9.88    0.32
   1   1  14   10.76    0.36
   1   1  14    9.06    0.32
   1  -1  14    9.82    0.25
   1  -1  14    9.82    0.25
   1  -1  14   10.42    0.35
  -1  -1 -14   10.66    0.36
   1  -1  14   10.09    0.32
   1  -1  14   10.73    0.32
  -1  -1 -14   10.54    0.36
   1   1  15    7.03    0.23
   1   1  15    6.96    0.22
  -1   1 -15    6.78    0.26
   1   1  15    6.96    0.23
   1  -1  15    7.17    0.23
   1  -1  15    6.98    0.18
   1  -1  15    6.98    0.18
   1  -1  15    6.53    0.24
   1  -1  15    7.04    0.22
   1  -1  15    6.96    0.22
   1   1  16    2.79    0.11
  -1   1 -16    2.66    0.12
   1   1  16    2.73    0.11
   1   1  16    2.79    0.11
   1  -1  16    2.79    0.11
  -1  -1 -16    2.83    0.12
   1  -1  16    2.75    0.12
   1  -1  16    2.69    0.09
   1  -1  16    2.77    0.11
   1  -1  16    2.73    0.11
   1  -1  16    2.69    0.09
   1   1  17    6.95    0.21
   1   1  17    6.93    0.21
  -1   1 -17    6.60    0.25
   1   1  17    6.36    0.21
   1  -1  17    6.80    0.17
   1  -1  17    6.98    0.22
   1  -1  17    6.77    0.21
   1  -1  17    6.94    0.21
   1  -1  17    6.80    0.17
  -1  -1 -17    6.50    0.24
   1  -1  17    6.84    0.23
   1   1  18    0.06    0.02
   1   1  18    0.04    0.02
   1   1  18    0.04    0.02
   1  -1  18    0.05    0.02
   1  -1  18    0.05    0.02
   1  -1  18    0.06    0.01
   1  -1  18    0.06    0.01
   1  -1  18    0.05    0.02
   1  -1  18    0.06    0.02
   1   1  19    2.30    0.08
   1   1  19    2.34    0.08
   1   1  19    2.32    0.08
   1  -1  19    2.31    0.09
   1  -1  19    2.49    0.07
   1  -1  19    2.37    0.09
   1  -1  19    2.49    0.07
   1  -1  19    2.31    0.08
   1  -1  19    2.50    0.08
  -1   2  19    5.92    0.17
  -1   2  19    5.67    0.17
  -1  -2  19    5.74    0.13
  -1  -2  19    5.74    0.13
  -1  -2  19    5.80    0.17
  -1  -2  19    5.40    0.17
  -1  -2  19    5.93    0.17
  -1  -2  19    6.02    0.19
  -1   2  18    5.23    0.17
  -1   2  18    5.28    0.17
  -1   2  18    5.36    0.16
  -1  -2  18    5.40    0.16
  -1  -2  18    5.38    0.13
  -1  -2  18    5.38    0.13
  -1  -2  18    5.29    0.18
  -1  -2  18    5.23    0.16
  -1  -2  18    5.26    0.16
  -1   2  17    4.83    0.16
  -1   2  17    5.00    0.16
  -1   2  17    5.09    0.15
  -1  -2  17    4.95    0.16
  -1  -2  17    4.95    0.13
   1  -2 -17    4.81    0.18
  -1  -2  17    4.90    0.16
  -1  -2  17    4.75    0.18
  -1  -2  17    4.95    0.13
  -1  -2  17    4.79    0.16
  -1   2  16    0.28    0.04
  -1   2  16    0.32    0.03
   1   2 -16    0.27    0.04
  -1   2  16    0.36    0.04
  -1   2  16    0.27    0.04
  -1  -2  16    0.27    0.03
  -1  -2  16    0.31    0.03
  -1  -2  16    0.31    0.03
  -1  -2  16    0.31    0.03
   1  -2 -16    0.34    0.04
  -1  -2  16    0.25    0.04
  -1  -2  16    0.24    0.03
   1   2 -15    0.02    0.02
  -1   2  15    0.01    0.01
  -1   2  15   -0.01    0.02
  -1   2  15    0.03    0.02
  -1  -2  15    0.00    0.02
  -1  -2  15    0.03    0.02
  -1  -2  15    0.06    0.02
  -1  -2  15    0.00    0.01
  -1  -2  15    0.02    0.02
  -1  -2  15    0.00    0.01
   1   2 -14    3.32    0.15
  -1   2  14    3.62    0.14
  -1   2  14    3.68    0.14
  -1   2  14    3.45    0.13
  -1  -2  14    3.55    0.13
  -1  -2  14    3.62    0.15
   1  -2 -14    3.45    0.14
  -1  -2  14    3.40    0.10
  -1  -2  14    3.40    0.10
  -1  -2  14    3.59    0.13
  -1  -2  14    3.51    0.12
   1   2 -13   25.22    0.82
  -1   2  13   24.78    0.84
  -1   2  13   25.78    0.80
   1   2 -13   23.42    0.88
   1   2 -13   26.77    0.82
   1  -2 -13   24.84    0.84
   1  -2 -13   25.18    0.84
   1  -2 -13   25.05    0.80
   1   2 -12   45.01    1.39
   1   2 -12   46.03    1.52
   1   2 -12   45.57    1.42
  -1   2  12   44.35    1.37
  -1   2  12   43.86    1.45
   1  -2 -12   47.02    1.49
   1  -2 -12   43.33    1.45
   1   2 -11    5.39    0.22
   1   2 -11    5.59    0.23
   1   2 -11    5.94    0.21
  -1   2  11    5.43    0.21
  -1   2  11    5.21    0.22
   1  -2 -11    5.19    0.17
   1  -2 -11    5.19    0.17
   1  -2 -11    5.11    0.20
   1  -2 -11    5.21    0.22
  -1   2  10    0.32    0.04
   1   2 -10    0.33    0.05
  -1   2  10    0.30    0.04
   1   2 -10    0.36    0.05
   1   2 -10    0.33    0.04
   1  -2 -10    0.33    0.04
   1  -2 -10    0.33    0.05
   1  -2 -10    0.28    0.03
   1  -2 -10    0.33    0.04
   1   2  -9    2.56    0.12
   1   2  -9    2.39    0.11
  -1   2   9    2.39    0.11
  -1   2   9    2.20    0.11
   1   2  -9    2.31    0.12
  -1   2   9    2.45    0.09
  -1   2   9    2.45    0.09
   1  -2  -9    2.38    0.09
   1  -2  -9    2.42    0.10
   1  -2  -9    2.38    0.09
  -1   2   8   30.64    0.74
  -1   2   8   30.64    0.74
  -1   2   8   28.48    0.97
   1   2  -8   30.39    0.93
  -1   2   8   30.91    0.91
   1   2  -8   30.31    1.02
   1  -2  -8   29.32    0.74
   1  -2  -8   29.32    0.74
   1  -2  -8   30.23    1.00
  -1   2   7  123.63    3.74
  -1   2   7  122.67    2.82
  -1   2   7  122.67    2.82
   1   2  -7  115.72    3.90
   1   2  -7  118.46    3.53
  -1   2   7  122.70    3.52
   1  -2  -7  118.99    2.82
   1  -2  -7  112.80    3.89
   1  -2  -7  118.99    2.82
  -1   2   6    2.41    0.11
   1   2  -6    2.33    0.11
  -1   2   6    2.22    0.09
   1   2  -6    2.33    0.10
  -1   2   6    2.26    0.08
  -1   2   6    2.26    0.08
   1   2  -6    2.20    0.11
   1  -2  -6    2.19    0.08
   1  -2  -6    2.19    0.08
   1  -2  -6    2.06    0.09
   1   2  -5   24.98    0.77
  -1   2   5   25.10    0.82
   1   2  -5   24.95    0.81
  -1   2   5   24.85    0.62
  -1   2   5   24.85    0.62
  -1   2   5   25.00    0.77
   1  -2  -5   24.96    0.62
   1  -2  -5   27.25    0.84
   1  -2  -5   24.96    0.62
  -1   2   4    0.30    0.03
   1   2  -3    3.59    0.13
  -1   2   3    3.40    0.10
  -1   2   3    3.35    0.12
  -1   2   3    3.35    0.13
  -1   2   3    3.40    0.10
   1   2  -3    3.38    0.13
   1  -2  -3    3.31    0.13
   1   2  -2    0.71    0.04
  -1   2   2    0.76    0.05
  -1   2   2    0.78    0.04
  -1   2   2    0.66    0.08
  -1   2   2    0.74    0.04
   1   2  -2    0.84    0.05
  -1   2   2    0.78    0.04
  -1  -2   2    0.72    0.06
   1  -2  -2    0.72    0.07
  -1  -2   2    0.73    0.07
   1  -2  -2    0.81    0.05
   1   2  -1    0.07    0.02
   1   2  -1    0.06    0.01
   1   2  -1    0.01    0.01
  -1   2   1    0.01    0.01
  -1   2   1    0.01    0.01
   1   2  -1    0.06    0.01
  -1  -2   1    0.12    0.02
   1  -2  -1    0.04    0.02
  -1  -2   1    0.01    0.02
   1  -2  -1    0.01    0.01
   1   2   0   38.11    0.88
   1   2   0   38.11    0.88
  -1   2   0   37.34    1.17
  -1   2   0   37.79    1.11
  -1   2   0   37.34    0.88
   1   2   0   36.72    1.11
   1   2   0   37.51    1.17
  -1   2   0   37.34    0.88
  -1  -2   0   35.14    1.22
   1  -2   0   36.86    1.22
   1  -2   0   34.79    1.86
  -1  -2   0   37.01    1.86
   1   2   1   11.71    0.37
   1   2   1   11.98    0.30
   1   2   1   11.99    0.40
  -1   2  -1   11.89    0.39
  -1   2  -1   11.95    0.38
   1   2   1   11.98    0.30
  -1  -2  -1   11.99    0.63
   1  -2   1   11.97    0.62
   1  -2   1   11.76    0.62
  -1  -2  -1   12.04    0.41
  -1   2  -2    7.93    0.26
   1   2   2    7.75    0.26
   1   2   2    7.97    0.28
   1   2   2    8.05    0.21
   1   2   2    8.05    0.21
  -1  -2  -2    8.21    0.45
  -1  -2  -2    7.83    0.28
   1   2   3   39.73    0.96
   1   2   3   39.99    1.19
   1   2   3   39.87    1.27
  -1   2  -3   39.95    1.20
   1   2   3   39.73    0.96
  -1  -2  -3   40.67    1.31
   1   2   4    3.13    0.13
  -1   2  -4    3.29    0.13
   1   2   4    3.42    0.11
   1   2   4    3.10    0.12
  -1   2  -4    3.20    0.14
   1   2   4    3.42    0.11
  -1  -2  -4    3.33    0.13
   1   2   5   19.26    0.64
  -1   2  -5   20.31    0.66
  -1   2  -5   18.56    0.60
   1   2   5   19.46    0.49
   1   2   5   19.46    0.49
   1   2   5   19.21    0.60
  -1  -2  -5   19.78    0.65
  -1   2  -6    0.55    0.04
   1   2   6    0.58    0.04
   1   2   6    0.58    0.04
   1   2   6    0.58    0.04
   1   2   6    0.55    0.05
  -1   2  -6    0.58    0.05
  -1  -2  -6    0.57    0.04
   1   2   7    0.85    0.05
   1   2   7    0.75    0.06
  -1   2  -7    0.85    0.06
   1   2   7    0.75    0.04
   1   2   7    0.75    0.04
  -1   2  -7    0.85    0.06
  -1  -2  -7    0.76    0.04
   1   2   8    0.39    0.04
   1   2   8    0.42    0.05
  -1   2  -8    0.32    0.04
   1   2   8    0.39    0.04
   1   2   8    0.39    0.04
  -1   2  -8    0.36    0.04
  -1  -2  -8    0.40    0.04
  -1  -2  -8    0.40    0.04
  -1  -2  -8    0.41    0.03
   1   2   9   56.79    1.70
   1   2   9   56.45    1.81
   1   2   9   58.18    1.37
  -1   2  -9   57.95    1.89
   1   2   9   58.18    1.37
  -1   2  -9   55.53    1.72
  -1   2  -9   55.37    1.77
  -1  -2  -9   56.46    1.86
  -1  -2  -9   57.58    1.37
  -1  -2  -9   57.58    1.37
   1   2  10    5.29    0.21
   1   2  10    5.13    0.16
  -1   2 -10    5.25    0.20
   1   2  10    5.13    0.16
  -1   2 -10    5.13    0.21
   1   2  10    5.43    0.20
  -1  -2 -10    4.97    0.16
  -1  -2 -10    5.16    0.19
  -1  -2 -10    4.97    0.16
   1   2  11    5.03    0.21
  -1   2 -11    5.27    0.22
   1   2  11    5.30    0.20
  -1   2 -11    5.25    0.21
  -1   2 -11    5.39    0.20
  -1  -2 -11    5.20    0.19
  -1  -2 -11    5.17    0.21
  -1  -2 -11    4.45    0.17
  -1  -2 -11    4.45    0.17
   1   2  12    4.51    0.19
   1   2  12    4.69    0.20
  -1   2 -12    4.56    0.20
  -1   2 -12    4.75    0.21
  -1   2 -12    4.67    0.19
  -1  -2 -12    4.81    0.20
  -1  -2 -12    4.64    0.18
   1   2  13    0.54    0.06
  -1   2 -13    0.46    0.05
  -1   2 -13    0.34    0.06
   1   2  13    0.48    0.05
   1   2  13    0.50    0.06
  -1   2 -13    0.40    0.06
   1   2  13    0.29    0.05
   1   2  13    0.44    0.04
   1  -2  13    0.58    0.05
   1  -2  13    0.38    0.05
   1  -2  13    0.45    0.05
   1  -2  13    0.51    0.05
   1  -2  13    0.45    0.04
  -1  -2 -13    0.47    0.04
   1  -2  13    0.45    0.04
  -1   2 -14    0.35    0.05
   1   2  14    0.42    0.05
   1   2  14    0.45    0.05
   1   2  14    0.37    0.04
   1  -2  14    0.50    0.04
   1  -2  14    0.42    0.05
   1  -2  14    0.41    0.04
   1  -2  14    0.44    0.04
   1  -2  14    0.42    0.04
   1  -2  14    0.42    0.04
   1   2  15    4.63    0.16
   1   2  15    4.88    0.16
  -1   2 -15    5.10    0.19
   1   2  15    4.68    0.17
   1  -2  15    4.59    0.16
   1  -2  15    4.81    0.16
   1  -2  15    4.68    0.13
   1  -2  15    4.72    0.16
   1  -2  15    4.68    0.13
   1  -2  15    4.96    0.18
   1   2  16    5.73    0.18
   1   2  16    5.77    0.17
   1   2  16    5.46    0.18
  -1   2 -16    5.44    0.21
  -1  -2 -16    5.39    0.20
   1  -2  16    5.41    0.18
   1  -2  16    5.36    0.14
   1  -2  16    5.59    0.20
   1  -2  16    5.36    0.14
   1  -2  16    5.67    0.18
   1  -2  16    5.71    0.18
   1   2  17    4.78    0.16
   1   2  17    4.74    0.15
   1   2  17    4.87    0.16
   1  -2  17    4.96    0.16
   1  -2  17    4.93    0.18
   1  -2  17    5.10    0.16
   1  -2  17    4.90    0.16
   1  -2  17    4.89    0.13
   1  -2  17    4.89    0.13
   1   2  18    3.10    0.10
   1   2  18    2.80    0.10
   1  -2  18    2.83    0.10
   1  -2  18    2.99    0.10
   1  -2  18    2.89    0.10
   1  -2  18    2.85    0.08
   1  -2  18    2.85    0.08
   1  -2  18    2.78    0.11
   1  -2  19    3.60    0.09
   1  -2  19    3.40    0.11
   1  -2  19    3.60    0.09
   1  -2  19    3.67    0.11
   1  -2  19    3.65    0.12
   1   3 -18    0.41    0.03
  -1   3  18    0.44    0.03
  -1   3  18    0.43    0.02
  -1  -3  18    0.46    0.03
  -1  -3  18    0.42    0.02
  -1   3  17    0.10    0.02
  -1   3  17    0.11    0.02
  -1   3  17    0.10    0.02
  -1  -3  17    0.07    0.02
  -1  -3  17    0.08    0.02
  -1   3  16   20.60    0.58
  -1   3  16   20.19    0.58
  -1   3  16   21.45    0.55
  -1  -3  16   20.83    0.63
  -1  -3  16   20.64    0.57
  -1   3  15   10.62    0.32
  -1   3  15   11.15    0.31
  -1   3  15   10.67    0.32
  -1  -3  15   11.37    0.35
  -1  -3  15   10.79    0.31
   1  -3 -15   10.73    0.37
  -1   3  14    3.49    0.13
  -1   3  14    3.50    0.13
  -1   3  14    3.66    0.14
  -1  -3  14    3.63    0.12
  -1  -3  14    3.52    0.14
   1  -3 -14    3.49    0.15
  -1   3  13    0.30    0.04
  -1   3  13    0.27    0.04
  -1   3  13    0.30    0.04
  -1  -3  13    0.31    0.04
  -1  -3  13    0.20    0.03
   1  -3 -13    0.24    0.03
  -1   3  12   43.26    1.14
  -1   3  12   41.99    1.20
  -1   3  12   42.00    1.19
  -1  -3  12   42.90    1.17
  -1  -3  12   44.27    1.29
   1  -3 -12   45.73    1.36
  -1   3  11   30.22    1.05
  -1   3  11   32.43    0.99
   1   3 -11   32.83    1.02
   1  -3 -11   32.06    0.80
   1  -3 -11   32.06    0.80
   1  -3 -11   31.97    1.01
   1  -3 -11   31.84    1.07
   1   3 -10    0.22    0.05
  -1   3  10    0.50    0.06
  -1   3  10    0.19    0.04
   1  -3 -10    0.27    0.04
   1  -3 -10    0.08    0.02
   1  -3 -10    0.08    0.02
  -1   3   9    0.35    0.04
  -1   3   9    0.35    0.04
   1   3  -9    0.59    0.07
  -1   3   9    0.51    0.05
  -1   3   9    0.47    0.06
   1  -3  -9    0.41    0.04
   1  -3  -9    0.49    0.04
   1  -3  -9    0.41    0.04
   1  -3  -9    0.49    0.04
  -1   3   8   17.34    0.61
  -1   3   8   17.61    0.57
  -1   3   8   17.47    0.46
   1   3  -8   17.22    0.59
  -1   3   8   17.47    0.46
   1  -3  -8   17.71    0.58
   1  -3  -8   18.21    0.46
   1  -3  -8   18.21    0.46
   1  -3  -8   18.42    0.62
   1   3  -7    1.04    0.08
  -1   3   7    1.02    0.07
  -1   3   7    1.00    0.06
  -1   3   7    1.00    0.06
  -1   3   7    1.03    0.07
   1  -3  -7    1.08    0.07
   1  -3  -7    1.00    0.06
   1  -3  -7    1.00    0.06
   1  -3  -7    1.02    0.06
  -1   3   6    4.29    0.14
  -1   3   6    4.29    0.14
   1   3  -6    4.40    0.18
  -1   3   6    4.27    0.17
  -1   3   6    4.19    0.18
   1  -3  -6    4.11    0.16
   1  -3  -6    4.14    0.14
   1  -3  -6    4.31    0.18
   1  -3  -6    4.14    0.14
  -1   3   5   11.48    0.39
  -1   3   5   12.16    0.32
  -1   3   5   11.97    0.42
   1   3  -5   11.44    0.40
  -1   3   5   12.16    0.32
   1  -3  -5   12.03    0.32
   1  -3  -5   12.21    0.42
   1  -3  -5   11.21    0.39
   1  -3  -5   12.03    0.32
  -1   3   4    3.62    0.15
  -1   3   4    3.79    0.16
   1   3  -4    3.60    0.15
  -1   3   4    3.54    0.12
  -1   3   4    3.54    0.12
   1  -3  -4    3.58    0.12
   1  -3  -4    3.62    0.15
   1  -3  -4    3.58    0.12
   1   3  -3    0.06    0.02
  -1   3   3    0.07    0.02
  -1   3   3    0.07    0.02
   1   3  -3    0.05    0.02
  -1   3   3    0.12    0.03
  -1   3   3    0.02    0.02
   1  -3  -3    0.04    0.02
   1   3  -2   15.21    0.51
  -1   3   2   15.66    0.40
   1   3  -2   16.10    0.53
  -1   3   2   15.66    0.40
  -1   3   2   15.84    0.53
  -1   3   2   15.68    0.50
   1   3  -1    9.66    0.34
  -1   3   1    9.62    0.26
  -1   3   1    9.62    0.26
   1   3  -1    9.73    0.33
  -1   3   1    9.43    0.34
  -1   3   1    9.49    0.32
  -1   3   0    7.08    0.25
   1   3   0    6.82    0.26
   1   3   0    6.81    0.19
   1   3   0    6.77    0.24
   1   3   0    6.81    0.19
  -1   3   0    7.11    0.24
  -1  -3   0    6.72    0.26
   1   3   1    2.19    0.10
   1   3   1    2.12    0.11
  -1   3  -1    2.11    0.10
   1   3   1    2.25    0.08
   1   3   1    2.25    0.08
  -1  -3  -1    2.03    0.11
   1   3   2    2.90    0.10
  -1   3  -2    3.01    0.13
   1   3   2    2.97    0.13
   1   3   2    2.97    0.13
   1   3   2    2.90    0.10
  -1  -3  -2    2.95    0.13
  -1   3  -3    1.91    0.10
   1   3   3    1.98    0.09
   1   3   3    1.92    0.08
   1   3   3    1.92    0.10
   1   3   3    1.92    0.08
  -1  -3  -3    1.92    0.10
   1   3   4    1.59    0.09
  -1   3  -4    1.47    0.09
   1   3   4    1.62    0.08
   1   3   4    1.58    0.07
   1   3   4    1.58    0.07
  -1  -3  -4    1.47    0.08
  -1   3  -5    1.47    0.09
   1   3   5    1.53    0.07
   1   3   5    1.47    0.08
   1   3   5    1.49    0.09
   1   3   5    1.53    0.07
  -1  -3  -5    1.49    0.07
   1   3   6    1.66    0.08
   1   3   6    1.68    0.10
  -1   3  -6    1.51    0.09
   1   3   6    1.53    0.08
   1   3   6    1.66    0.08
  -1  -3  -6    1.53    0.08
  -1  -3  -6    1.53    0.07
  -1   3  -7    1.58    0.10
   1   3   7    1.53    0.09
   1   3   7    1.56    0.09
   1   3   7    1.63    0.08
   1   3   7    1.63    0.08
  -1  -3  -7    1.49    0.07
  -1  -3  -7    1.67    0.09
  -1  -3  -7    1.52    0.07
  -1  -3  -7    1.52    0.07
   1   3   8    1.79    0.08
   1   3   8    1.79    0.08
   1   3   8    1.91    0.10
   1   3   8    1.81    0.11
  -1   3  -8    2.13    0.12
  -1  -3  -8    1.69    0.08
  -1  -3  -8    1.98    0.10
  -1  -3  -8    2.01    0.09
  -1  -3  -8    2.01    0.09
  -1   3  -9    6.89    0.27
   1   3   9    6.81    0.21
   1   3   9    6.81    0.21
   1   3   9    7.14    0.28
   1   3   9    6.86    0.25
  -1  -3  -9    6.85    0.21
  -1  -3  -9    6.85    0.21
  -1  -3  -9    6.97    0.26
  -1  -3  -9    6.71    0.24
   1   3  10    0.04    0.03
   1   3  10    0.05    0.02
  -1   3 -10    0.02    0.03
   1   3  10    0.04    0.02
   1   3  10    0.04    0.02
  -1  -3 -10    0.00    0.02
  -1  -3 -10    0.00    0.02
  -1  -3 -10    0.03    0.02
  -1  -3 -10    0.05    0.02
   1   3  11   23.86    0.73
   1   3  11   23.33    0.78
   1   3  11   24.07    0.63
  -1   3 -11   22.94    0.75
  -1  -3 -11   22.88    0.59
  -1  -3 -11   22.88    0.59
  -1  -3 -11   22.87    0.77
  -1  -3 -11   22.51    0.73
  -1  -3 -11   23.13    0.78
   1  -3  11   20.45    0.64
   1   3  12   16.50    0.46
   1   3  12   16.66    0.48
   1  -3  12   16.32    0.47
   1  -3  12   16.52    0.52
  -1  -3 -12   16.37    0.54
   1  -3  12   16.60    0.47
   1   3  13    1.33    0.07
   1   3  13    1.26    0.06
  -1  -3 -13    1.24    0.07
   1  -3  13    1.28    0.07
   1  -3  13    1.26    0.06
   1  -3  13    1.28    0.06
   1   3  14    7.53    0.22
   1   3  14    7.34    0.23
  -1  -3 -14    7.37    0.26
   1  -3  14    7.21    0.23
   1  -3  14    7.31    0.22
   1  -3  14    7.69    0.26
   1   3  15    1.90    0.07
   1   3  15    1.92    0.08
   1  -3  15    1.81    0.07
   1  -3  15    1.78    0.07
   1  -3  15    1.74    0.08
  -1  -3 -15    1.68    0.08
   1   3  16    0.32    0.03
   1   3  16    0.40    0.03
   1  -3  16    0.38    0.03
   1  -3  16    0.25    0.02
   1  -3  16    0.29    0.03
   1   3  17    0.04    0.01
   1   3  17    0.03    0.01
   1  -3  17    0.02    0.01
   1  -3  17    0.02    0.01
   1  -3  17    0.04    0.01
  -1   4  16    3.96    0.12
  -1  -4  16    4.10    0.12
  -1   4  15   10.67    0.30
  -1   4  15   11.11    0.31
  -1  -4  15   10.89    0.31
  -1   4  14    0.25    0.03
  -1   4  14    0.31    0.03
  -1  -4  14    0.26    0.02
  -1   4  13    4.79    0.15
  -1   4  13    4.49    0.16
  -1  -4  13    4.86    0.15
   1  -4 -13    4.70    0.18
  -1   4  12    0.96    0.06
  -1   4  12    0.97    0.06
  -1  -4  12    1.04    0.05
   1  -4 -12    1.06    0.07
  -1   4  11    1.40    0.07
  -1   4  11    1.28    0.07
  -1  -4  11    1.43    0.06
   1  -4 -11    1.34    0.08
  -1   4  10    4.30    0.15
  -1   4  10    4.09    0.15
  -1  -4  10    4.15    0.14
   1  -4 -10    4.23    0.17
  -1   4   9    0.42    0.04
  -1   4   9    0.34    0.04
   1  -4  -9    0.39    0.05
  -1  -4   9    0.46    0.03
  -1   4   8    2.22    0.10
   1   4  -8    2.59    0.14
  -1   4   8    2.23    0.10
  -1   4   8    2.42    0.12
  -1  -4   8    2.37    0.09
   1  -4  -8    2.25    0.12
   1  -4  -8    2.73    0.11
   1  -4  -8    2.30    0.12
   1  -4  -8    2.73    0.11
  -1   4   7    5.39    0.21
  -1   4   7    5.15    0.18
  -1   4   7    5.15    0.18
   1  -4  -7    5.30    0.21
   1  -4  -7    5.51    0.18
   1  -4  -7    4.79    0.22
   1  -4  -7    5.51    0.18
  -1   4   6    0.28    0.05
  -1   4   6    0.31    0.04
  -1   4   6    0.24    0.04
  -1   4   6    0.31    0.04
   1   4  -6    0.22    0.05
   1  -4  -6    0.38    0.04
   1  -4  -6    0.38    0.04
   1  -4  -6    0.29    0.04
   1  -4  -6    0.28    0.04
  -1   4   5    0.22    0.04
  -1   4   5    0.21    0.04
  -1   4   5    0.24    0.04
   1   4  -5    0.28    0.05
  -1   4   5    0.22    0.04
   1  -4  -5    0.24    0.03
   1  -4  -5    0.24    0.04
   1  -4  -5    0.24    0.03
   1  -4  -5    0.23    0.04
  -1   4   4    4.01    0.17
  -1   4   4    3.94    0.14
  -1   4   4    3.94    0.18
  -1   4   4    3.94    0.14
   1   4  -4    4.00    0.18
   1  -4  -4    4.05    0.16
   1  -4  -4    3.92    0.14
   1  -4  -4    3.91    0.18
   1  -4  -4    3.92    0.14
  -1   4   3   11.95    0.45
  -1   4   3   12.99    0.34
  -1   4   3   12.99    0.34
   1   4  -3   12.47    0.44
  -1   4   3   12.29    0.43
   1  -4  -3   12.10    0.43
   1  -4  -3   13.06    0.34
   1  -4  -3   13.06    0.34
  -1   4   2    0.32    0.05
   1   4  -2    0.42    0.06
   1  -4  -2    0.42    0.04
  -1   4   1    5.60    0.22
   1   4  -1    5.62    0.23
   1  -4  -1    5.47    0.21
  -1   4   0    0.00    0.02
   1   4   0    0.02    0.02
   1   4   0    0.02    0.02
  -1  -4   0    0.02    0.02
   1   4   1    0.12    0.03
  -1   4  -1    0.16    0.04
   1   4   1    0.10    0.03
  -1  -4  -1    0.12    0.03
   1   4   2   28.44    0.92
   1   4   2   27.23    0.69
   1   4   2   27.23    0.69
   1   4   2   27.51    0.87
  -1   4  -2   28.69    0.88
  -1  -4  -2   27.63    0.69
  -1  -4  -2   26.66    0.95
  -1  -4  -2   27.63    0.69
  -1  -4  -2   27.24    0.88
  -1   4  -3    1.79    0.11
   1   4   3    1.82    0.08
   1   4   3    1.82    0.08
   1   4   3    1.90    0.11
   1   4   3    1.99    0.11
  -1  -4  -3    1.90    0.10
  -1  -4  -3    1.94    0.08
  -1  -4  -3    1.94    0.08
  -1  -4  -3    2.00    0.11
  -1   4  -4    0.73    0.07
   1   4   4    0.77    0.05
   1   4   4    0.77    0.05
   1   4   4    0.84    0.07
   1   4   4    0.76    0.06
  -1  -4  -4    0.84    0.06
  -1  -4  -4    0.80    0.07
  -1  -4  -4    0.86    0.05
  -1  -4  -4    0.86    0.05
   1   4   5    0.09    0.03
   1   4   5    0.10    0.02
  -1   4  -5    0.07    0.03
   1   4   5    0.10    0.02
   1   4   5    0.10    0.03
  -1  -4  -5    0.10    0.03
  -1  -4  -5    0.12    0.03
  -1  -4  -5    0.09    0.02
  -1  -4  -5    0.12    0.03
  -1   4  -6    0.09    0.04
   1   4   6    0.08    0.02
   1   4   6    0.09    0.03
   1   4   6    0.08    0.02
   1   4   6    0.05    0.03
  -1  -4  -6    0.09    0.02
  -1  -4  -6    0.08    0.02
  -1  -4  -6    0.08    0.02
  -1  -4  -6    0.07    0.03
   1   4   7    5.54    0.19
  -1   4  -7    5.57    0.24
   1   4   7    5.54    0.19
   1   4   7    5.64    0.22
   1   4   7    5.70    0.24
  -1  -4  -7    5.37    0.21
  -1  -4  -7    5.50    0.18
  -1  -4  -7    5.33    0.23
  -1  -4  -7    5.50    0.18
   1   4   8    4.70    0.16
   1   4   8    4.69    0.16
  -1   4  -8    4.55    0.23
   1  -4   8    4.47    0.15
  -1  -4  -8    4.55    0.20
  -1  -4  -8    4.78    0.19
   1   4   9    0.83    0.05
   1   4   9    0.81    0.06
  -1  -4  -9    0.79    0.06
   1  -4   9    0.83    0.05
   1   4  10    1.42    0.08
   1   4  10    1.42    0.07
  -1  -4 -10    1.47    0.08
   1  -4  10    1.39    0.06
   1   4  11    7.23    0.22
   1   4  11    7.66    0.23
  -1  -4 -11    6.99    0.26
   1  -4  11    7.20    0.22
   1   4  12    0.16    0.03
   1   4  12    0.16    0.03
   1  -4  12    0.18    0.02
  -1  -4 -12    0.15    0.03
   1   4  13    0.75    0.05
   1   4  13    0.65    0.04
  -1  -4 -13    0.67    0.05
   1  -4  13    0.70    0.04
   1   4  14    0.13    0.02
   1   4  14    0.22    0.02
   1  -4  14    0.12    0.02
   1   4  15    0.45    0.03
   1   4  15    0.49    0.03
   1  -4  15    0.53    0.03
  -1   5  13    1.51    0.05
  -1   5  12    0.01    0.01
  -1   5  12    0.01    0.01
  -1  -5  12    0.01    0.01
  -1   5  11    2.48    0.09
  -1   5  11    2.37    0.09
  -1  -5  11    2.57    0.08
  -1   5  10    0.77    0.05
  -1   5  10    0.77    0.04
  -1  -5  10    0.84    0.04
  -1   5   9    0.06    0.02
  -1   5   9    0.02    0.01
   1  -5  -9    0.04    0.02
  -1  -5   9    0.03    0.01
  -1   5   8    0.49    0.04
  -1   5   8    0.45    0.04
  -1  -5   8    0.45    0.03
   1  -5  -8    0.45    0.04
  -1   5   7    5.52    0.18
  -1   5   7    5.07    0.17
   1  -5  -7    5.12    0.20
  -1  -5   7    5.33    0.16
  -1   5   6    0.70    0.05
  -1   5   6    0.71    0.05
  -1  -5   6    0.72    0.04
   1  -5  -6    0.68    0.06
  -1   5   5    2.97    0.11
  -1   5   5    3.06    0.11
  -1  -5   5    3.07    0.11
   1  -5  -5    2.96    0.11
   1  -5  -5    3.00    0.14
  -1   5   4    0.75    0.05
  -1   5   4    0.81    0.05
  -1  -5   4    0.63    0.04
   1  -5  -4    0.64    0.05
  -1   5   3   14.14    0.39
  -1   5   3   14.24    0.41
   1  -5  -3   14.11    0.41
  -1  -5   3   14.30    0.40
  -1   5   2   18.58    0.52
   1  -5  -2   18.61    0.52
  -1  -5   2   17.82    0.51
  -1   5   1   10.78    0.32
  -1  -5   1   11.06    0.32
   1  -5  -1   10.79    0.32
   1   5   0    0.14    0.02
   1   5   0    0.12    0.02
  -1   5   0    0.17    0.03
   1  -5   0    0.16    0.03
  -1  -5   0    0.19    0.03
   1   5   1    6.85    0.21
   1   5   1    6.79    0.21
   1  -5   1    6.69    0.21
  -1  -5  -1    6.90    0.21
   1   5   2    5.65    0.18
   1   5   2    5.60    0.18
   1  -5   2    5.73    0.18
  -1  -5  -2    5.73    0.18
   1   5   3    3.90    0.13
   1   5   3    3.75    0.13
  -1  -5  -3    3.74    0.13
   1  -5   3    3.84    0.13
  -1  -5  -3    3.69    0.16
   1   5   4    0.42    0.04
   1   5   4    0.46    0.04
  -1  -5  -4    0.49    0.04
  -1  -5  -4    0.47    0.05
   1  -5   4    0.41    0.03
   1   5   5    0.29    0.03
   1   5   5    0.39    0.04
  -1  -5  -5    0.30    0.04
   1  -5   5    0.37    0.03
  -1  -5  -5    0.29    0.03
   1   5   6    0.60    0.05
   1   5   6    0.63    0.04
  -1  -5  -6    0.65    0.05
   1  -5   6    0.67    0.04
   1   5   7    6.56    0.20
   1   5   7    6.26    0.20
   1  -5   7    6.46    0.20
  -1  -5  -7    6.42    0.24
   1   5   8    0.12    0.02
   1   5   8    0.12    0.02
   1  -5   8    0.13    0.02
  -1  -5  -8    0.13    0.03
   1   5   9    1.93    0.08
   1   5   9    1.82    0.08
  -1  -5  -9    1.84    0.09
   1  -5   9    1.83    0.07
   1   5  10    0.02    0.01
   1   5  10    0.03    0.01
   1  -5  10    0.03    0.01
   1   5  11    0.39    0.03
   1  -5  11    0.38    0.03
   1   5  12    0.70    0.04
   1  -5  12    0.65    0.03
   1   5  13    0.65    0.03
  -1   6   7    0.11    0.01
   1  -6  -7    0.12    0.01
  -1  -6   7    0.13    0.01
  -1   6   6    6.05    0.18
  -1  -6   6    6.43    0.18
   1  -6  -6    6.68    0.19
  -1  -6   5    0.05    0.01
   1  -6  -5    0.07    0.02
  -1  -6   4    0.23    0.02
   1  -6  -4    0.16    0.02
   1  -6  -3    4.28    0.13
  -1  -6   3    4.26    0.13
  -1  -6   2    3.55    0.11
   1  -6  -2    3.46    0.11
   1  -6  -1    5.57    0.17
  -1  -6   1    5.52    0.16
   1  -6   0    1.26    0.05
  -1  -6   0    1.17    0.05
   1  -6   1   10.54    0.30
   1   6   2    0.01    0.01
   1  -6   2    0.00    0.01
   1   6   3    0.72    0.04
   1  -6   3    0.72    0.04
   1   6   4    0.85    0.04
   1  -6   4    0.88    0.04
   1  -6   5    0.58    0.03
   1  -6   6    0.85    0.04
   1   6   7    1.72    0.06
   1  -6   7    1.81    0.06
  -2   0  20    1.60    0.06
  -2   0  20    1.54    0.06
  -2   0  20    1.54    0.05
  -2   0  20    1.39    0.06
  -2   0  20    1.54    0.05
  -2   0  19    0.02    0.01
  -2   0  19   -0.01    0.01
  -2   0  19   -0.01    0.01
  -2   0  19    0.01    0.01
  -2   0  19    0.02    0.01
  -2   0  18    0.21    0.03
   2   0 -18    0.18    0.03
  -2   0  18    0.20    0.03
  -2   0  18    0.23    0.02
  -2   0  18    0.23    0.02
  -2   0  18    0.22    0.03
   2   0 -17    0.03    0.02
  -2   0  17    0.01    0.02
  -2   0  17    0.01    0.01
  -2   0  17    0.01    0.01
  -2   0  17    0.02    0.02
  -2   0  17   -0.02    0.02
  -2   0  17   -0.01    0.02
  -2   0  16    0.61    0.05
  -2   0  16    0.62    0.04
  -2   0  16    0.62    0.04
  -2   0  16    0.64    0.04
   2   0 -16    0.50    0.05
  -2   0  16    0.60    0.05
  -2   0  16    0.63    0.05
  -2   0  15    0.00    0.02
   2   0 -15    0.06    0.02
  -2   0  15    0.02    0.02
   2   0 -15    0.00    0.02
  -2   0  15    0.03    0.02
  -2   0  15    0.01    0.02
  -2   0  15    0.00    0.02
   2   0 -15    0.00    0.01
   2   0 -14   13.61    0.48
   2   0 -14   13.73    0.46
   2   0 -14   13.27    0.45
   2   0 -13    0.00    0.02
   2   0 -13    0.02    0.02
   2   0 -13    0.01    0.01
   2   0 -13   -0.01    0.01
   2   0 -12    4.99    0.20
   2   0 -12    5.15    0.20
   2   0 -12    5.22    0.19
  -2   0  12    5.21    0.20
   2   0 -12    5.13    0.20
  -2   0  11   -0.02    0.01
   2   0 -11    0.00    0.01
   2   0 -11    0.01    0.01
   2   0 -11    0.00    0.01
   2   0 -11    0.00    0.01
  -2   0  10   19.64    0.61
   2   0 -10   19.36    0.65
   2   0 -10   18.96    0.64
   2   0 -10   19.38    0.60
   2   0  -9    0.00    0.01
   2   0  -9    0.02    0.01
   2   0  -9    0.01    0.01
  -2   0   9   -0.03    0.01
  -2   0   8    9.57    0.31
   2   0  -8    9.89    0.31
   2   0  -8    9.09    0.32
   2   0  -8    9.82    0.33
   2   0  -7    0.01    0.01
   2   0  -7    0.00    0.01
   2   0  -7    0.00    0.01
   2   0  -7    0.00    0.01
  -2   0   7    0.00    0.01
   2   0  -7    0.00    0.01
   2   0  -7    0.00    0.01
   2   0  -6   84.17    2.56
   2   0  -6   79.51    2.69
  -2   0   6   82.98    4.09
   2   0  -6   81.69    4.12
  -2   0   5   -0.01    0.01
  -2   0   5    0.01    0.01
   2   0  -5    0.01    0.01
   2   0  -4    7.10    0.37
  -2   0   4    6.96    0.37
  -2   0   3   -0.19    0.01
   2   0  -3   -0.19    0.01
   2   0  -2   61.77    3.02
  -2   0   2   58.73    3.02
   2   0  -1    0.00    0.00
   2   0   0    0.00    0.01
  -2   0   0   -0.01    0.01
   2   0   1   -0.11    0.01
  -2   0  -1   -0.08    0.01
  -2   0  -1   -0.10    0.01
   2   0   2   42.16    1.93
  -2   0  -2   36.66    1.92
  -2   0  -2   35.04    2.24
  -2   0  -3   -0.06    0.01
  -2   0  -3   -0.05    0.01
  -2   0  -4  107.12    5.09
  -2   0  -4   95.20    5.94
  -2   0  -4  102.35    5.07
   2   0   5    0.01    0.01
  -2   0  -5    0.00    0.01
  -2   0  -5    0.01    0.01
  -2   0  -6  109.39    3.81
  -2   0  -6  129.80    3.69
   2   0   6  112.66    3.48
  -2   0  -7   -0.03    0.01
  -2   0  -7   -0.03    0.01
   2   0   7   -0.03    0.01
  -2   0  -7   -0.04    0.01
   2   0   7   -0.04    0.01
  -2   0  -8   41.64    1.32
  -2   0  -8   41.42    1.25
   2   0   8   43.14    1.25
  -2   0  -8   41.53    1.37
  -2   0  -9    0.00    0.01
   2   0   9   -0.01    0.01
  -2   0  -9    0.00    0.01
   2   0  10    5.19    0.18
  -2   0 -10    4.75    0.18
  -2   0 -10    4.72    0.18
  -2   0 -11    0.00    0.01
  -2   0 -11    0.00    0.01
   2   0  11   -0.01    0.01
  -2   0 -12   17.68    0.56
  -2   0 -12   16.91    0.59
  -2   0 -13   -0.01    0.02
  -2   0 -13    0.04    0.02
  -2   0 -14    4.87    0.18
  -2   0 -14    4.94    0.20
  -2   0 -14    4.55    0.19
   2   0  15    0.01    0.02
   2   0  15    0.01    0.02
  -2   0 -15    0.01    0.02
   2   0  15    0.00    0.01
   2   0  15    0.06    0.02
   2   0  15    0.00    0.02
   2   0  15    0.00    0.01
   2   0  16   19.23    0.55
   2   0  16   19.95    0.44
   2   0  16   19.77    0.56
  -2   0 -16   18.80    0.63
   2   0  16   19.95    0.44
   2   0  16   19.54    0.56
   2   0  17    0.04    0.02
   2   0  17    0.04    0.02
   2   0  17    0.01    0.02
   2   0  17    0.01    0.02
   2   0  17    0.00    0.01
  -2   0 -17    0.03    0.02
   2   0  18    0.10    0.02
   2   0  18    0.10    0.02
   2   0  18    0.09    0.02
   2   0  18    0.09    0.02
   2   0  18    0.09    0.02
   2   0  19    0.01    0.01
   2   0  19    0.00    0.01
   2   0  19    0.02    0.01
   2   0  19    0.01    0.01
   2   0  19    0.01    0.01
  -2   1  20    0.32    0.02
  -2   1  20    0.36    0.03
   2   1 -20    0.35    0.03
  -2   1  20    0.37    0.03
  -2  -1  20    0.37    0.02
  -2  -1  20    0.35    0.02
  -2  -1  20    0.36    0.03
  -2  -1  20    0.33    0.02
  -2  -1  20    0.32    0.02
  -2  -1  20    0.37    0.02
  -2   1  19    0.13    0.02
  -2   1  19    0.14    0.02
  -2   1  19    0.12    0.02
  -2   1  19    0.13    0.02
  -2  -1  19    0.15    0.02
  -2  -1  19    0.13    0.02
  -2  -1  19    0.15    0.02
  -2  -1  19    0.18    0.02
  -2  -1  19    0.16    0.02
  -2  -1  19    0.16    0.02
  -2   1  18    2.59    0.09
   2   1 -18    2.70    0.12
  -2   1  18    2.34    0.07
  -2   1  18    2.64    0.10
  -2   1  18    2.58    0.10
  -2   1  18    2.58    0.10
  -2   1  18    2.34    0.07
  -2  -1  18    2.75    0.11
  -2  -1  18    2.54    0.10
  -2  -1  18    2.71    0.10
  -2  -1  18    2.74    0.08
  -2  -1  18    2.57    0.10
  -2  -1  18    2.74    0.08
   2  -1 -18    2.72    0.11
   2   1 -17    2.50    0.12
  -2   1  17    2.57    0.08
  -2   1  17    2.46    0.10
  -2   1  17    2.54    0.10
  -2   1  17    2.70    0.11
  -2   1  17    2.63    0.10
  -2   1  17    2.57    0.08
  -2  -1  17    2.45    0.11
  -2  -1  17    2.71    0.08
  -2  -1  17    2.71    0.08
  -2  -1  17    2.55    0.10
  -2  -1  17    2.51    0.10
  -2  -1  17    2.55    0.10
   2  -1 -17    2.77    0.12
  -2   1  16    5.51    0.18
  -2   1  16    5.29    0.18
  -2   1  16    5.20    0.17
  -2   1  16    5.46    0.14
   2   1 -16    5.29    0.21
  -2   1  16    5.50    0.18
  -2   1  16    5.46    0.14
  -2  -1  16    5.13    0.18
   2  -1 -16    5.55    0.20
  -2  -1  16    5.37    0.20
  -2  -1  16    5.10    0.18
  -2  -1  16    5.52    0.14
  -2  -1  16    5.52    0.14
  -2  -1  16    5.14    0.18
  -2   1  15    2.21    0.10
  -2   1  15    2.27    0.10
  -2   1  15    2.17    0.07
  -2   1  15    2.17    0.07
   2   1 -15    2.23    0.11
  -2   1  15    2.15    0.09
  -2   1  15    2.32    0.10
  -2  -1  15    2.15    0.09
  -2  -1  15    2.10    0.08
  -2  -1  15    2.26    0.10
  -2  -1  15    2.10    0.10
  -2  -1  15    2.10    0.08
  -2  -1  15    2.08    0.09
   2  -1 -15    2.30    0.10
   2   1 -14    1.32    0.09
   2   1 -14    1.46    0.09
  -2   1  14    1.32    0.09
   2   1 -14    1.42    0.08
   2  -1 -14    1.40    0.09
   2  -1 -14    1.26    0.07
   2  -1 -14    1.29    0.08
   2  -1 -14    1.40    0.07
   2   1 -13    1.86    0.11
  -2   1  13    1.97    0.10
   2   1 -13    1.93    0.10
   2   1 -13    1.72    0.10
   2  -1 -13    1.87    0.09
   2  -1 -13    1.97    0.10
   2  -1 -13    1.79    0.09
   2  -1 -13    1.85    0.10
   2   1 -12    1.40    0.09
   2   1 -12    1.29    0.07
  -2   1  12    1.42    0.08
   2   1 -12    1.30    0.08
   2  -1 -12    1.34    0.08
   2  -1 -12    1.44    0.07
   2  -1 -12    1.38    0.07
   2  -1 -12    1.50    0.09
   2   1 -11    3.09    0.14
   2   1 -11    3.07    0.13
   2   1 -11    2.91    0.14
  -2   1  11    2.95    0.13
  -2   1  11    3.13    0.14
   2  -1 -11    2.99    0.12
   2  -1 -11    3.04    0.14
   2   1 -10   10.22    0.34
   2   1 -10    9.65    0.35
   2   1 -10   10.02    0.34
   2   1 -10   10.16    0.36
  -2   1  10    9.88    0.35
  -2   1  10    9.82    0.33
   2  -1 -10   10.14    0.35
   2  -1 -10   10.04    0.35
   2  -1 -10    9.81    0.26
   2  -1 -10    9.81    0.26
  -2   1   9    7.79    0.25
   2   1  -9    7.62    0.27
   2   1  -9    7.85    0.27
   2   1  -9    7.37    0.26
  -2   1   9    7.13    0.26
   2  -1  -9    6.92    0.20
   2  -1  -9    6.92    0.20
   2  -1  -9    7.40    0.26
   2  -1  -9    7.47    0.27
   2   1  -8    7.10    0.25
  -2   1   8    6.74    0.23
  -2   1   8    7.01    0.25
   2   1  -8    6.76    0.24
   2   1  -8    6.93    0.25
   2  -1  -8    6.82    0.19
   2  -1  -8    6.82    0.19
   2  -1  -8    6.70    0.24
   2  -1  -8    7.24    0.25
  -2   1   7    2.56    0.08
  -2   1   7    2.53    0.11
  -2   1   7    2.58    0.10
  -2   1   7    2.56    0.08
   2   1  -7    2.52    0.11
   2   1  -7    2.64    0.10
   2   1  -7    2.38    0.11
   2  -1  -7    2.66    0.08
   2  -1  -7    2.66    0.08
   2  -1  -7    2.55    0.10
   2  -1  -7    2.57    0.11
  -2   1   6    2.19    0.09
  -2   1   6    2.18    0.07
   2   1  -6    2.00    0.09
  -2   1   6    2.17    0.08
  -2   1   6    2.18    0.07
   2   1  -6    2.24    0.09
   2   1  -6    2.33    0.09
   2  -1  -6    2.09    0.08
   2  -1  -6    2.14    0.07
   2  -1  -6    2.14    0.07
   2  -1  -6    2.13    0.15
   2   1  -5   13.74    0.47
  -2   1   5   14.11    0.34
   2   1  -5   13.69    0.43
  -2   1   5   14.14    0.42
   2   1  -5   13.94    0.70
  -2   1   5   14.11    0.34
   2   1  -5   14.21    0.45
  -2   1   5   13.97    0.45
   2  -1  -5   13.49    0.72
   2  -1  -5   13.55    0.34
  -2  -1   5   13.58    0.70
   2  -1  -5   13.55    0.34
   2  -1  -5   13.88    0.46
   2   1  -4   44.58    1.34
  -2   1   4   43.06    2.63
  -2   1   4   45.62    1.34
  -2   1   4   46.72    1.42
   2   1  -4   43.95    2.25
  -2   1   4   44.73    1.07
  -2   1   4   44.73    1.07
   2  -1  -4   44.87    2.26
   2  -1  -4   44.45    1.48
   2  -1  -4   45.71    1.07
   2  -1  -4   45.71    1.07
  -2  -1   4   49.16    2.27
  -2   1   3    4.43    0.28
   2   1  -3    4.60    0.23
   2  -1  -3    4.36    0.24
   2  -1  -3    3.90    0.28
  -2   1   2   43.13    2.49
  -2   1   2   42.37    2.13
   2   1  -2   40.02    2.10
   2  -1  -2   43.20    2.12
  -2   1   1   93.09    4.95
   2   1  -1  101.26    4.95
  -2  -1   1  101.33    4.94
  -2   1   0   29.51    1.52
   2   1   0   27.73    1.53
   2  -1   0   32.66    1.54
  -2  -1   0   32.54    1.53
   2   1   1    0.64    0.06
  -2   1  -1    0.59    0.04
   2  -1   1    0.62    0.04
  -2  -1  -1    0.65    0.05
   2   1   2  127.77    7.00
   2  -1   2  121.34    6.26
  -2  -1  -2   98.79    6.72
  -2  -1  -2  128.55    6.87
   2  -1   2  134.68    6.23
   2   1   3    0.07    0.03
  -2  -1  -3    0.16    0.03
   2   1   4   14.65    0.37
   2   1   4   14.65    0.37
   2   1   4   15.21    0.90
   2   1   4   14.71    0.45
  -2   1  -4   16.21    0.50
   2   1   4   14.66    0.49
  -2  -1  -4   14.60    0.78
   2   1   5   23.59    0.56
   2   1   5   22.76    0.74
   2   1   5   23.59    0.56
   2   1   5   23.53    0.69
  -2   1  -5   22.90    0.70
  -2   1  -5   22.88    0.77
  -2  -1  -5   22.71    1.18
   2   1   6    5.18    0.16
   2   1   6    4.74    0.14
  -2   1  -6    4.96    0.18
   2   1   6    4.74    0.14
   2   1   6    4.74    0.18
  -2   1  -6    4.59    0.17
  -2  -1  -6    4.63    0.28
   2   1   7    3.43    0.10
   2   1   7    3.51    0.13
   2   1   7    3.33    0.13
   2   1   7    3.43    0.10
  -2   1  -7    3.44    0.13
  -2   1  -7    3.33    0.13
   2   1   8   24.40    0.60
  -2   1  -8   25.05    0.76
   2   1   8   25.09    0.75
   2   1   8   24.40    0.60
  -2   1  -8   24.07    0.82
  -2  -1  -8   25.37    0.81
  -2  -1  -8   24.55    0.60
  -2  -1  -8   24.55    0.60
  -2   1  -9    1.60    0.08
   2   1   9    1.55    0.08
   2   1   9    1.67    0.08
  -2   1  -9    1.55    0.08
  -2  -1  -9    1.52    0.08
  -2  -1  -9    1.54    0.06
  -2   1 -10   13.13    0.43
  -2   1 -10   12.57    0.42
  -2   1 -10   12.26    0.45
   2   1  10   13.36    0.42
  -2  -1 -10   13.39    0.43
  -2   1 -11   10.06    0.35
   2   1  11   10.29    0.35
   2   1  11   10.37    0.37
  -2   1 -11   10.39    0.38
  -2   1 -11   10.55    0.35
  -2  -1 -11   10.08    0.34
  -2  -1 -11   10.44    0.35
  -2  -1 -11   10.43    0.37
  -2   1 -12    9.37    0.33
  -2   1 -12    9.22    0.32
  -2   1 -12    8.99    0.34
   2   1  12    9.39    0.32
  -2  -1 -12    9.37    0.32
  -2  -1 -12    9.35    0.32
  -2   1 -13    0.20    0.04
  -2   1 -13    0.20    0.03
   2   1  13    0.15    0.04
  -2   1 -13    0.11    0.04
  -2  -1 -13    0.14    0.03
  -2  -1 -13    0.17    0.02
   2   1  14    0.30    0.05
   2   1  14    0.42    0.04
  -2   1 -14    0.44    0.05
   2   1  14    0.47    0.05
  -2   1 -14    0.32    0.05
   2   1  14    0.42    0.05
   2  -1  14    0.42    0.05
  -2  -1 -14    0.38    0.03
   2  -1  14    0.50    0.05
   2  -1  14    0.49    0.05
   2  -1  14    0.30    0.03
  -2  -1 -14    0.29    0.05
   2  -1  14    0.42    0.04
   2  -1  14    0.42    0.04
   2   1  15    2.53    0.11
  -2   1 -15    2.86    0.13
   2   1  15    2.81    0.11
   2   1  15    2.65    0.11
   2  -1  15    2.90    0.12
   2  -1  15    2.82    0.11
   2  -1  15    2.75    0.11
   2  -1  15    2.82    0.09
   2  -1  15    2.82    0.09
   2  -1  15    2.58    0.11
   2   1  16    1.86    0.08
   2   1  16    1.80    0.08
  -2   1 -16    1.72    0.09
   2   1  16    1.89    0.08
   2  -1  16    1.83    0.08
   2  -1  16    1.65    0.06
   2  -1  16    1.69    0.08
   2  -1  16    1.89    0.08
   2  -1  16    1.65    0.06
   2  -1  16    1.79    0.09
   2   1  17    0.33    0.04
   2   1  17    0.36    0.04
  -2   1 -17    0.37    0.04
   2   1  17    0.52    0.04
   2  -1  17    0.47    0.04
   2  -1  17    0.33    0.03
   2  -1  17    0.33    0.03
   2  -1  17    0.29    0.04
  -2  -1 -17    0.35    0.03
   2  -1  17    0.45    0.04
   2  -1  17    0.46    0.04
   2   1  18    0.15    0.02
   2   1  18    0.21    0.03
   2   1  18    0.21    0.03
   2  -1  18    0.21    0.03
   2  -1  18    0.19    0.02
   2  -1  18    0.21    0.02
   2  -1  18    0.22    0.03
   2  -1  18    0.21    0.02
   2  -1  18    0.23    0.03
   2   1  19    0.07    0.01
   2   1  19    0.02    0.01
   2   1  19    0.04    0.01
   2  -1  19    0.03    0.01
   2  -1  19    0.03    0.01
   2  -1  19    0.08    0.02
   2  -1  19    0.03    0.01
   2  -1  19    0.04    0.01
   2  -1  19    0.04    0.01
  -2   2  19    0.13    0.02
  -2   2  19    0.15    0.02
  -2   2  19    0.13    0.01
  -2  -2  19    0.15    0.02
  -2  -2  19    0.19    0.02
  -2  -2  19    0.14    0.02
  -2  -2  19    0.17    0.02
  -2  -2  19    0.19    0.02
  -2   2  18    0.43    0.04
  -2   2  18    0.49    0.03
  -2   2  18    0.39    0.03
  -2   2  18    0.44    0.03
  -2  -2  18    0.47    0.03
  -2  -2  18    0.51    0.04
  -2  -2  18    0.45    0.03
  -2  -2  18    0.43    0.03
  -2  -2  18    0.49    0.03
  -2  -2  18    0.45    0.03
  -2   2  17    0.36    0.04
  -2   2  17    0.28    0.03
  -2   2  17    0.44    0.04
  -2   2  17    0.42    0.04
  -2  -2  17    0.40    0.03
  -2  -2  17    0.35    0.03
  -2  -2  17    0.45    0.03
  -2  -2  17    0.37    0.04
   2  -2 -17    0.32    0.04
  -2  -2  17    0.42    0.04
  -2  -2  17    0.45    0.03
  -2   2  16    4.89    0.16
   2   2 -16    4.76    0.19
  -2   2  16    4.82    0.17
  -2   2  16    4.79    0.17
  -2   2  16    4.80    0.16
  -2  -2  16    4.70    0.16
   2  -2 -16    4.92    0.18
  -2  -2  16    4.71    0.13
  -2  -2  16    4.78    0.18
  -2  -2  16    4.82    0.16
  -2  -2  16    4.77    0.16
  -2  -2  16    4.71    0.13
  -2   2  15    0.14    0.03
  -2   2  15    0.15    0.03
   2   2 -15    0.34    0.04
  -2   2  15    0.19    0.03
  -2   2  15    0.21    0.04
  -2  -2  15    0.17    0.03
  -2  -2  15    0.18    0.03
   2  -2 -15    0.17    0.03
  -2  -2  15    0.17    0.03
  -2  -2  15    0.18    0.02
  -2  -2  15    0.23    0.03
  -2  -2  15    0.18    0.02
  -2   2  14    1.29    0.07
   2   2 -14    1.21    0.08
  -2   2  14    1.28    0.07
  -2   2  14    1.18    0.07
  -2   2  14    1.30    0.07
  -2  -2  14    1.20    0.06
   2  -2 -14    1.24    0.07
  -2  -2  14    1.18    0.05
  -2  -2  14    1.22    0.08
  -2  -2  14    1.18    0.05
  -2  -2  14    1.09    0.06
  -2   2  13   12.98    0.45
   2   2 -13   13.40    0.47
   2   2 -13   13.26    0.46
   2  -2 -13   13.09    0.48
   2  -2 -13   13.93    0.44
   2  -2 -13   13.46    0.47
  -2   2  12    3.11    0.14
   2   2 -12    3.13    0.15
   2   2 -12    3.09    0.14
  -2   2  12    2.96    0.15
   2  -2 -12    2.95    0.11
   2  -2 -12    2.90    0.12
   2  -2 -12    3.11    0.15
   2  -2 -12    2.95    0.11
   2  -2 -12    3.16    0.13
  -2   2  11   10.13    0.34
   2   2 -11    9.90    0.36
   2   2 -11    9.76    0.34
  -2   2  11    9.54    0.36
   2  -2 -11   10.00    0.27
   2  -2 -11   10.01    0.35
   2  -2 -11    9.18    0.33
   2  -2 -11   10.00    0.27
   2  -2 -11    9.68    0.36
   2   2 -10   11.15    0.39
  -2   2  10   11.09    0.40
   2   2 -10   10.47    0.42
  -2   2  10   11.66    0.37
   2   2 -10   11.76    0.38
   2  -2 -10   10.93    0.40
   2  -2 -10   11.08    0.30
   2  -2 -10   10.64    0.36
   2  -2 -10   11.31    0.39
   2  -2 -10   11.08    0.30
   2   2  -9    0.49    0.04
  -2   2   9    0.51    0.04
   2   2  -9    0.54    0.05
  -2   2   9    0.44    0.04
   2  -2  -9    0.44    0.04
   2  -2  -9    0.53    0.04
   2  -2  -9    0.44    0.04
   2  -2  -9    0.43    0.04
  -2   2   8   33.58    1.06
  -2   2   8   32.74    0.80
  -2   2   8   32.74    0.80
  -2   2   8   33.37    1.00
   2   2  -8   33.71    1.01
   2  -2  -8   32.06    0.80
   2  -2  -8   32.51    1.09
   2  -2  -8   32.06    0.80
   2   2  -7    6.72    0.25
   2   2  -7    6.36    0.24
  -2   2   7    6.40    0.23
  -2   2   7    6.62    0.19
  -2   2   7    6.67    0.24
  -2   2   7    6.62    0.19
   2  -2  -7    6.55    0.19
   2  -2  -7    6.55    0.19
   2  -2  -7    6.74    0.24
  -2   2   6    5.65    0.21
  -2   2   6    5.49    0.16
   2   2  -6    5.68    0.21
   2   2  -6    5.13    0.20
  -2   2   6    5.49    0.16
  -2   2   6    5.49    0.19
   2  -2  -6    5.70    0.16
   2  -2  -6    5.89    0.21
   2  -2  -6    5.70    0.16
  -2   2   5   10.22    0.34
   2   2  -5    9.53    0.34
  -2   2   5    9.77    0.26
   2   2  -5   10.03    0.33
  -2   2   5    9.77    0.26
  -2   2   5    9.95    0.32
   2  -2  -5   10.12    0.26
   2  -2  -5   10.12    0.26
   2  -2  -5    9.74    0.35
   2   2  -4    0.12    0.02
  -2   2   4    0.14    0.02
   2   2  -4    0.13    0.03
  -2   2   4    0.26    0.03
  -2   2   4    0.14    0.02
  -2   2   4    0.16    0.02
   2  -2  -4    0.14    0.02
   2  -2  -4    0.10    0.02
   2  -2  -4    0.14    0.02
  -2   2   3    6.47    0.17
   2   2  -3    6.75    0.23
  -2   2   3    6.59    0.21
  -2   2   3    6.47    0.17
   2   2  -3    6.20    0.22
  -2   2   3    6.10    0.22
   2   2  -3    6.22    0.35
   2  -2  -3    6.28    0.23
   2  -2  -3    6.34    0.17
   2  -2  -3    6.34    0.17
  -2  -2   3    6.26    0.35
   2   2  -2    1.49    0.05
   2   2  -2    1.47    0.11
   2   2  -2    1.49    0.05
  -2   2   2    1.46    0.05
  -2   2   2    1.51    0.07
   2   2  -2    1.51    0.07
  -2   2   2    1.56    0.07
  -2   2   2    1.46    0.05
   2   2  -2    1.49    0.07
  -2   2   2    1.48    0.13
  -2  -2   2    1.35    0.11
   2  -2  -2    1.40    0.11
  -2  -2   2    1.40    0.07
  -2   2   1    2.29    0.07
  -2   2   1    2.28    0.09
   2   2  -1    2.32    0.07
   2   2  -1    2.37    0.10
   2   2  -1    2.32    0.16
  -2   2   1    2.43    0.10
   2   2  -1    2.32    0.07
   2   2  -1    2.37    0.10
  -2   2   1    2.29    0.07
   2  -2  -1    2.30    0.15
  -2  -2   1    2.29    0.10
  -2  -2   1    2.43    0.16
  -2   2   0    2.16    0.09
   2   2   0    2.14    0.07
   2   2   0    2.10    0.09
   2   2   0    2.14    0.07
   2   2   0    2.32    0.10
  -2   2   0    2.13    0.09
  -2  -2   0    2.21    0.15
   2  -2   0    2.11    0.14
  -2  -2   0    2.13    0.09
  -2   2  -1    9.99    0.33
   2   2   1   10.40    0.35
   2   2   1   10.44    0.27
   2   2   1   10.44    0.27
   2   2   1   10.93    0.33
   2  -2   1   10.20    0.54
  -2  -2  -1   10.58    0.36
  -2  -2  -1   10.45    0.56
   2   2   2    2.07    0.07
  -2   2  -2    1.94    0.08
   2   2   2    2.07    0.07
   2   2   2    2.17    0.09
   2   2   2    1.98    0.08
  -2  -2  -2    1.89    0.09
   2   2   3   45.84    1.48
   2   2   3   46.04    1.39
   2   2   3   46.08    1.12
  -2   2  -3   46.78    1.39
  -2   2  -3   47.57    1.54
   2   2   3   46.08    1.12
  -2  -2  -3   48.85    1.53
  -2   2  -4    2.49    0.11
   2   2   4    2.78    0.12
  -2   2  -4    2.62    0.11
   2   2   4    2.49    0.09
   2   2   4    2.49    0.09
   2   2   4    2.52    0.10
  -2  -2  -4    2.68    0.10
   2   2   5   31.68    0.76
  -2   2  -5   31.08    1.05
   2   2   5   31.40    1.01
   2   2   5   30.64    0.94
  -2   2  -5   31.22    0.95
   2   2   5   31.68    0.76
  -2  -2  -5   31.11    1.03
   2   2   6    9.41    0.26
  -2   2  -6    9.55    0.34
   2   2   6    9.40    0.31
   2   2   6    9.55    0.33
  -2   2  -6    9.58    0.32
   2   2   6    9.41    0.26
  -2  -2  -6    9.16    0.33
   2   2   7   21.05    0.53
   2   2   7   20.89    0.70
   2   2   7   21.05    0.53
  -2   2  -7   20.20    0.66
  -2   2  -7   22.37    0.73
   2   2   7   20.75    0.65
  -2  -2  -7   21.46    0.70
  -2   2  -8   13.38    0.51
  -2   2  -8   14.92    0.48
   2   2   8   14.89    0.38
   2   2   8   14.65    0.46
   2   2   8   14.89    0.38
   2   2   8   14.40    0.50
  -2   2  -8   14.61    0.48
  -2  -2  -8   14.26    0.38
  -2  -2  -8   14.26    0.38
  -2  -2  -8   14.46    0.49
  -2   2  -9    3.53    0.16
   2   2   9    3.75    0.13
  -2   2  -9    3.48    0.15
   2   2   9    3.67    0.16
   2   2   9    3.54    0.14
  -2   2  -9    3.61    0.16
   2   2   9    3.75    0.13
  -2  -2  -9    3.60    0.12
  -2  -2  -9    3.79    0.14
  -2  -2  -9    3.60    0.12
  -2   2 -10    3.87    0.17
  -2   2 -10    4.06    0.16
   2   2  10    3.95    0.13
  -2   2 -10    3.71    0.17
   2   2  10    3.73    0.15
   2   2  10    3.72    0.17
   2   2  10    3.95    0.13
  -2  -2 -10    3.88    0.15
  -2  -2 -10    3.91    0.13
  -2  -2 -10    3.91    0.13
  -2   2 -11   28.23    0.88
  -2   2 -11   28.27    0.94
   2   2  11   26.43    0.84
   2   2  11   27.44    0.90
  -2   2 -11   26.66    0.86
  -2  -2 -11   27.04    0.90
  -2  -2 -11   26.09    0.90
  -2   2 -12   31.35    0.99
   2   2  12   31.19    0.95
   2   2  12   30.48    1.01
  -2   2 -12   30.37    1.06
  -2   2 -12   30.19    0.97
  -2  -2 -12   31.66    1.02
  -2  -2 -12   29.70    1.01
   2   2  13    1.43    0.08
   2   2  13    1.17    0.09
  -2   2 -13    1.27    0.09
   2   2  13    1.41    0.07
  -2   2 -13    1.41    0.08
   2  -2  13    1.38    0.08
  -2  -2 -13    1.36    0.08
   2  -2  13    1.29    0.06
   2  -2  13    1.32    0.07
  -2  -2 -13    1.31    0.06
   2  -2  13    1.35    0.07
   2  -2  13    1.29    0.06
   2  -2  13    1.34    0.06
  -2   2 -14    1.10    0.08
   2   2  14    1.18    0.07
   2   2  14    1.28    0.06
   2   2  14    1.14    0.07
   2  -2  14    1.30    0.06
   2  -2  14    1.26    0.05
   2  -2  14    1.26    0.05
   2  -2  14    1.11    0.07
   2  -2  14    1.11    0.06
   2  -2  14    1.16    0.06
  -2   2 -15    1.04    0.07
   2   2  15    0.92    0.05
   2   2  15    0.94    0.06
   2   2  15    0.94    0.06
   2  -2  15    0.91    0.06
   2  -2  15    0.93    0.05
   2  -2  15    0.93    0.05
   2  -2  15    0.92    0.06
   2  -2  15    1.00    0.06
   2  -2  15    0.92    0.05
  -2   2 -16    0.61    0.05
   2   2  16    0.64    0.05
   2   2  16    0.62    0.04
   2   2  16    0.49    0.04
   2  -2  16    0.66    0.04
   2  -2  16    0.61    0.04
   2  -2  16    0.65    0.04
   2  -2  16    0.66    0.05
   2  -2  16    0.66    0.04
   2  -2  16    0.71    0.05
   2   2  17    1.56    0.07
   2   2  17    1.60    0.07
   2  -2  17    1.68    0.06
   2  -2  17    1.68    0.06
   2  -2  17    1.58    0.07
   2  -2  17    1.63    0.08
   2  -2  17    1.65    0.07
   2  -2  17    1.65    0.07
   2   2  18    0.48    0.03
   2   2  18    0.44    0.03
   2  -2  18    0.47    0.04
   2  -2  18    0.48    0.03
   2  -2  18    0.49    0.03
   2  -2  18    0.44    0.03
   2  -2  18    0.47    0.03
   2  -2  18    0.47    0.03
  -2   3  18    0.99    0.04
   2   3 -18    1.06    0.05
  -2   3  18    0.99    0.04
  -2  -3  18    0.97    0.04
  -2  -3  18    0.95    0.05
  -2   3  17    0.17    0.02
  -2   3  17    0.14    0.02
  -2   3  17    0.15    0.02
  -2  -3  17    0.17    0.02
  -2  -3  17    0.24    0.03
  -2   3  16    1.82    0.08
  -2   3  16    1.72    0.08
  -2   3  16    1.70    0.07
  -2  -3  16    1.69    0.08
  -2  -3  16    1.74    0.07
  -2   3  15   16.29    0.45
  -2   3  15   16.47    0.47
  -2   3  15   15.74    0.47
  -2  -3  15   16.39    0.46
   2  -3 -15   16.19    0.53
  -2  -3  15   16.48    0.51
  -2   3  14    3.71    0.14
  -2   3  14    3.64    0.13
  -2   3  14    3.61    0.14
  -2  -3  14    3.97    0.15
  -2  -3  14    3.72    0.13
   2  -3 -14    3.44    0.15
  -2   3  13    2.47    0.10
  -2   3  13    2.21    0.10
  -2   3  13    2.35    0.10
   2  -3 -13    2.28    0.11
  -2  -3  13    2.23    0.11
  -2  -3  13    2.39    0.09
  -2   3  12   15.74    0.45
  -2   3  12   15.71    0.47
  -2   3  12   16.14    0.47
  -2  -3  12   15.72    0.45
   2  -3 -12   16.24    0.53
  -2  -3  12   15.46    0.50
   2   3 -11   10.70    0.39
  -2   3  11   10.44    0.36
  -2   3  11   10.31    0.39
   2  -3 -11    9.81    0.37
   2  -3 -11   10.41    0.36
   2  -3 -11   10.41    0.39
   2  -3 -11   10.46    0.30
   2  -3 -11   10.46    0.30
   2   3 -10    5.54    0.23
  -2   3  10    5.30    0.22
  -2   3  10    5.62    0.21
   2  -3 -10    5.42    0.22
   2  -3 -10    5.06    0.17
   2  -3 -10    5.06    0.17
   2  -3 -10    5.18    0.21
   2  -3 -10    5.38    0.20
  -2   3   9   12.84    0.41
   2   3  -9   12.48    0.44
  -2   3   9   11.79    0.44
   2  -3  -9   12.18    0.34
   2  -3  -9   12.56    0.44
   2  -3  -9   11.89    0.41
   2  -3  -9   12.18    0.34
   2   3  -8   16.69    0.57
  -2   3   8   16.68    0.59
  -2   3   8   17.04    0.45
  -2   3   8   17.04    0.45
  -2   3   8   16.74    0.55
   2  -3  -8   17.01    0.45
   2  -3  -8   18.56    0.56
   2  -3  -8   17.72    0.60
   2  -3  -8   17.01    0.45
  -2   3   7    1.79    0.09
  -2   3   7    1.72    0.08
  -2   3   7    1.69    0.10
   2   3  -7    1.63    0.10
  -2   3   7    1.72    0.08
   2  -3  -7    1.70    0.08
   2  -3  -7    1.64    0.09
   2  -3  -7    1.72    0.08
   2  -3  -7    1.72    0.08
  -2   3   6    1.04    0.06
  -2   3   6    1.04    0.06
  -2   3   6    1.07    0.07
   2   3  -6    1.10    0.08
  -2   3   6    0.95    0.06
   2  -3  -6    1.10    0.06
   2  -3  -6    1.20    0.07
   2  -3  -6    1.05    0.06
   2  -3  -6    1.05    0.06
  -2   3   5    0.30    0.04
   2   3  -5    0.23    0.04
  -2   3   5    0.30    0.04
  -2   3   5    0.33    0.04
  -2   3   5    0.33    0.04
   2  -3  -5    0.45    0.04
   2  -3  -5    0.25    0.04
   2  -3  -5    0.45    0.04
   2  -3  -5    0.22    0.03
   2   3  -4    1.35    0.08
  -2   3   4    1.46    0.06
  -2   3   4    1.46    0.06
  -2   3   4    1.40    0.08
   2   3  -4    1.49    0.09
  -2   3   4    1.42    0.08
   2  -3  -4    1.47    0.08
   2  -3  -4    1.50    0.06
   2  -3  -4    1.50    0.06
   2   3  -3    1.17    0.07
  -2   3   3    1.16    0.07
  -2   3   3    1.13    0.05
  -2   3   3    1.13    0.05
   2   3  -3    1.14    0.07
  -2   3   3    1.06    0.07
   2  -3  -3    1.13    0.07
   2  -3  -3    1.12    0.05
   2  -3  -3    1.12    0.05
   2   3  -2   26.01    0.87
  -2   3   2   27.37    0.65
   2   3  -2   24.91    0.82
  -2   3   2   26.47    0.82
  -2   3   2   27.37    0.65
  -2   3   2   26.57    0.86
   2  -3  -2   26.39    0.65
   2  -3  -2   27.45    0.90
   2  -3  -2   26.39    0.65
  -2   3   1    2.25    0.08
  -2   3   1    2.25    0.08
  -2   3   1    2.32    0.10
   2   3  -1    2.26    0.08
   2   3  -1    2.46    0.11
   2   3  -1    2.31    0.11
  -2   3   1    2.33    0.11
   2   3  -1    2.26    0.08
   2  -3  -1    2.25    0.08
   2  -3  -1    2.25    0.08
  -2  -3   1    2.24    0.11
   2   3   0    0.06    0.02
  -2   3   0    0.08    0.02
   2   3   0    0.06    0.02
   2   3   0    0.06    0.02
   2   3   0    0.06    0.02
  -2  -3   0    0.05    0.02
   2   3   1    7.59    0.21
  -2   3  -1    7.46    0.26
   2   3   1    7.59    0.21
   2   3   1    7.69    0.26
   2   3   1    7.60    0.28
  -2  -3  -1    6.99    0.28
  -2   3  -2   35.03    1.05
   2   3   2   32.31    1.04
   2   3   2   33.86    0.84
   2   3   2   34.29    1.11
   2   3   2   33.86    0.84
  -2  -3  -2   36.11    1.15
   2   3   3    4.06    0.13
  -2   3  -3    4.11    0.16
   2   3   3    3.94    0.17
   2   3   3    3.99    0.16
   2   3   3    4.06    0.13
  -2  -3  -3    4.16    0.17
   2   3   4    1.02    0.06
   2   3   4    1.08    0.07
   2   3   4    0.92    0.05
   2   3   4    0.92    0.05
  -2   3  -4    1.00    0.07
  -2  -3  -4    1.09    0.07
  -2  -3  -4    1.07    0.06
  -2   3  -5    0.34    0.05
   2   3   5    0.33    0.04
   2   3   5    0.33    0.04
   2   3   5    0.27    0.04
   2   3   5    0.33    0.04
  -2  -3  -5    0.33    0.04
  -2  -3  -5    0.32    0.03
   2   3   6    2.37    0.11
  -2   3  -6    2.29    0.12
   2   3   6    2.41    0.10
   2   3   6    2.50    0.13
   2   3   6    2.41    0.10
  -2  -3  -6    2.26    0.10
   2   3   7    0.41    0.04
   2   3   7    0.71    0.06
  -2   3  -7    0.46    0.06
   2   3   7    0.56    0.05
   2   3   7    0.41    0.04
  -2  -3  -7    0.42    0.04
  -2  -3  -7    0.42    0.04
  -2  -3  -7    0.49    0.04
   2   3   8    9.18    0.34
   2   3   8    8.83    0.26
   2   3   8    9.27    0.31
   2   3   8    8.83    0.26
  -2   3  -8    8.60    0.33
  -2  -3  -8    8.93    0.33
  -2  -3  -8    9.17    0.26
  -2  -3  -8    9.17    0.26
   2   3   9    1.62    0.09
   2   3   9    1.59    0.08
   2   3   9    1.57    0.10
  -2   3  -9    1.65    0.10
   2   3   9    1.59    0.08
  -2  -3  -9    1.72    0.09
  -2  -3  -9    1.72    0.08
  -2  -3  -9    1.72    0.08
   2   3  10   94.24    2.75
  -2   3 -10   90.04    2.86
  -2   3 -10   89.72    2.77
   2   3  10   92.88    2.93
  -2  -3 -10   95.73    3.02
  -2  -3 -10   92.01    2.21
  -2  -3 -10   92.01    2.21
   2   3  11   14.65    0.42
   2   3  11   14.78    0.41
   2   3  11   13.66    0.39
  -2   3 -11   14.09    0.49
   2   3  11   13.66    0.39
   2   3  11   14.64    0.48
   2   3  11   13.91    0.51
  -2  -3 -11   14.99    0.50
   2  -3  11   14.47    0.41
  -2  -3 -11   14.61    0.39
  -2  -3 -11   14.61    0.39
   2  -3  11   14.49    0.42
  -2  -3 -11   14.32    0.51
   2   3  12    9.12    0.26
  -2   3 -12    7.64    0.32
   2   3  12    8.66    0.27
   2  -3  12    9.16    0.30
   2  -3  12    9.14    0.26
   2  -3  12    9.06    0.27
   2   3  13   12.29    0.35
   2   3  13   12.49    0.37
   2  -3  13   12.44    0.36
   2  -3  13   12.23    0.36
   2  -3  13   12.33    0.40
   2   3  14    3.41    0.12
   2   3  14    3.48    0.13
   2  -3  14    3.38    0.14
   2  -3  14    3.41    0.12
   2  -3  14    3.36    0.12
   2   3  15    1.85    0.08
   2   3  15    1.75    0.07
   2  -3  15    1.89    0.07
   2  -3  15    1.85    0.07
   2  -3  15    1.80    0.08
   2   3  16    7.13    0.20
   2   3  16    6.72    0.21
   2  -3  16    6.71    0.23
   2  -3  16    6.91    0.21
   2  -3  16    7.28    0.21
   2   3  17    0.03    0.01
   2  -3  17    0.04    0.01
   2  -3  17    0.05    0.01
   2  -3  17    0.04    0.01
  -2   4  16    0.35    0.02
  -2   4  16    0.37    0.02
  -2  -4  16    0.38    0.02
  -2   4  15    2.73    0.09
  -2   4  15    2.52    0.09
  -2  -4  15    2.56    0.09
  -2   4  14    0.96    0.05
  -2   4  14    0.93    0.05
  -2  -4  14    0.93    0.04
  -2   4  13    0.77    0.05
  -2   4  13    0.89    0.05
   2  -4 -13    0.80    0.06
  -2  -4  13    0.83    0.04
  -2   4  12    2.12    0.09
  -2   4  12    2.16    0.09
   2  -4 -12    2.02    0.10
  -2  -4  12    2.07    0.08
  -2   4  11    0.79    0.06
  -2   4  11    0.81    0.05
  -2  -4  11    0.78    0.04
   2  -4 -11    0.73    0.06
  -2   4  10    0.14    0.03
  -2   4  10    0.10    0.03
   2  -4 -10    0.12    0.03
  -2  -4  10    0.11    0.02
  -2   4   9    0.70    0.05
  -2   4   9    0.69    0.05
   2  -4  -9    0.75    0.06
  -2  -4   9    0.72    0.04
  -2   4   8    3.02    0.11
  -2   4   8    2.63    0.12
  -2   4   8    3.22    0.14
   2   4  -8    3.10    0.16
  -2  -4   8    3.02    0.11
   2  -4  -8    3.08    0.12
   2  -4  -8    3.08    0.12
   2  -4  -8    2.79    0.14
   2  -4  -8    2.92    0.14
  -2   4   7   14.14    0.51
  -2   4   7   14.22    0.48
   2   4  -7   13.96    0.50
   2  -4  -7   14.04    0.52
   2  -4  -7   14.67    0.39
   2  -4  -7   14.50    0.49
   2  -4  -7   14.67    0.39
  -2   4   6    1.51    0.09
  -2   4   6    1.47    0.08
  -2   4   6    1.29    0.09
   2   4  -6    1.54    0.10
  -2   4   6    1.47    0.08
   2  -4  -6    1.49    0.07
   2  -4  -6    1.49    0.07
   2  -4  -6    1.49    0.09
   2  -4  -6    1.44    0.08
  -2   4   5    0.11    0.03
  -2   4   5    0.11    0.03
  -2   4   5    0.06    0.03
   2   4  -5    0.04    0.03
  -2   4   5    0.07    0.03
   2  -4  -5    0.06    0.02
   2  -4  -5    0.03    0.02
   2  -4  -5    0.04    0.02
   2  -4  -5    0.06    0.02
  -2   4   4    1.71    0.10
  -2   4   4    1.73    0.08
   2   4  -4    1.80    0.11
  -2   4   4    1.69    0.10
  -2   4   4    1.73    0.08
   2  -4  -4    1.81    0.09
   2  -4  -4    1.82    0.08
   2  -4  -4    1.87    0.11
   2  -4  -4    1.82    0.08
  -2   4   3    1.14    0.08
   2   4  -3    1.02    0.08
   2  -4  -3    1.10    0.07
   2   4  -2    1.34    0.09
  -2   4   2    1.31    0.08
   2  -4  -2    1.26    0.07
  -2   4   1    3.43    0.15
   2   4  -1    3.65    0.16
   2   4  -1    3.37    0.16
   2   4   0   10.37    0.39
   2   4   0   10.12    0.36
  -2   4   0   10.73    0.36
  -2  -4   0   10.01    0.35
   2   4   1    7.18    0.29
  -2   4  -1    7.14    0.27
   2   4   1    7.25    0.27
  -2  -4  -1    7.47    0.26
  -2   4  -2    0.94    0.07
   2   4   2    1.06    0.06
   2   4   2    0.99    0.08
   2   4   2    0.98    0.07
   2   4   2    1.06    0.06
  -2  -4  -2    0.93    0.06
   2   4   3    6.38    0.20
   2   4   3    6.49    0.25
  -2   4  -3    6.42    0.25
   2   4   3    6.35    0.26
   2   4   3    6.38    0.20
  -2   4  -4   17.97    0.58
   2   4   4   16.81    0.46
   2   4   4   16.87    0.57
   2   4   4   16.81    0.46
   2   4   4   18.76    0.62
  -2  -4  -4   17.44    0.46
  -2  -4  -4   16.64    0.62
  -2  -4  -4   17.95    0.57
  -2  -4  -4   17.44    0.46
   2   4   5    2.41    0.13
   2   4   5    2.22    0.10
   2   4   5    2.45    0.12
   2   4   5    2.22    0.10
  -2   4  -5    2.41    0.13
  -2  -4  -5    2.27    0.10
  -2  -4  -5    2.27    0.10
  -2  -4  -5    2.35    0.11
  -2  -4  -5    2.38    0.12
   2   4   6    7.68    0.28
   2   4   6    8.01    0.24
  -2   4  -6    7.60    0.30
   2   4   6    7.13    0.30
   2   4   6    8.01    0.24
  -2  -4  -6    7.49    0.23
  -2  -4  -6    7.80    0.28
  -2  -4  -6    7.75    0.30
  -2  -4  -6    7.49    0.23
   2   4   7    0.01    0.02
   2   4   7    0.05    0.02
   2   4   7    0.03    0.02
   2   4   7    0.05    0.02
  -2   4  -7    0.01    0.02
  -2  -4  -7    0.16    0.03
  -2  -4  -7    0.02    0.02
  -2  -4  -7    0.01    0.02
  -2  -4  -7    0.02    0.02
   2   4   8    3.23    0.12
  -2  -4  -8    3.19    0.14
   2  -4   8    3.08    0.11
   2   4   9   19.09    0.53
  -2  -4  -9   19.36    0.63
   2  -4   9   19.35    0.54
   2   4  10    7.00    0.22
  -2  -4 -10    7.00    0.25
   2  -4  10    6.94    0.21
   2   4  11    2.22    0.09
   2   4  11    2.17    0.09
   2  -4  11    2.04    0.08
  -2  -4 -11    1.92    0.10
   2   4  12    1.67    0.07
  -2  -4 -12    1.76    0.08
   2  -4  12    1.69    0.07
   2   4  13    0.24    0.03
   2  -4  13    0.23    0.02
   2   4  14    0.31    0.03
   2  -4  14    0.33    0.03
   2   4  15    4.92    0.14
   2  -4  15    4.71    0.14
  -2   5  13    0.81    0.04
  -2   5  13    0.82    0.04
  -2   5  12    0.50    0.03
  -2   5  12    0.46    0.03
  -2  -5  12    0.47    0.03
  -2   5  11    4.43    0.14
  -2   5  11    4.58    0.15
  -2  -5  11    4.75    0.14
  -2   5  10    0.03    0.02
  -2   5  10    0.06    0.02
  -2  -5  10    0.05    0.01
  -2   5   9    0.02    0.02
  -2   5   9   -0.01    0.01
   2  -5  -9   -0.01    0.02
  -2  -5   9    0.01    0.01
  -2   5   8    0.13    0.02
  -2  -5   8    0.15    0.02
   2  -5  -8    0.11    0.03
  -2   5   7    1.35    0.07
  -2   5   7    1.45    0.07
  -2  -5   7    1.39    0.06
   2  -5  -7    1.45    0.08
  -2   5   6   15.87    0.45
  -2   5   6   15.25    0.43
  -2  -5   6   15.85    0.44
   2  -5  -6   15.30    0.52
  -2   5   5    0.04    0.02
  -2   5   5    0.08    0.02
  -2  -5   5    0.06    0.02
   2  -5  -5    0.04    0.02
   2  -5  -5    0.06    0.02
  -2   5   4    9.25    0.28
   2  -5  -4    8.96    0.28
  -2  -5   4    9.16    0.27
  -2   5   3    1.86    0.08
   2  -5  -3    1.99    0.08
  -2  -5   3    1.74    0.07
  -2   5   2    8.46    0.26
   2   5  -2    8.51    0.25
   2  -5  -2    8.49    0.26
   2   5  -1    0.55    0.04
  -2   5   1    0.61    0.05
   2  -5  -1    0.62    0.04
   2   5   0    1.64    0.07
  -2   5   0    1.77    0.08
   2  -5   0    1.71    0.08
   2   5   1    6.50    0.20
   2  -5   1    6.70    0.21
   2   5   2   10.34    0.30
  -2  -5  -2   10.53    0.37
   2  -5   2   10.55    0.31
   2   5   3    0.18    0.03
  -2  -5  -3    0.22    0.04
   2  -5   3    0.25    0.03
   2   5   4    0.76    0.05
   2  -5   4    0.73    0.04
  -2  -5  -4    0.69    0.06
   2   5   5    5.78    0.18
   2  -5   5    5.66    0.18
  -2  -5  -5    5.87    0.22
   2   5   6   11.24    0.32
  -2  -5  -6   11.24    0.39
   2  -5   6   11.33    0.32
   2   5   7    0.01    0.02
   2  -5   7    0.00    0.01
  -2  -5  -7    0.02    0.02
   2   5   8    0.14    0.02
   2  -5   8    0.18    0.02
  -2  -5  -8    0.15    0.03
   2   5   9    0.23    0.03
   2  -5   9    0.28    0.03
  -2  -5  -9    0.28    0.03
   2  -5  10    1.25    0.05
   2   5  11    0.35    0.03
   2  -5  11    0.28    0.02
   2   5  12    0.46    0.03
   2  -5  12    0.44    0.03
  -2   6   7    2.67    0.09
   2  -6  -7    2.56    0.08
   2  -6  -6    4.64    0.14
   2  -6  -5    7.78    0.23
   2  -6  -4    0.03    0.01
   2  -6  -3    4.95    0.15
   2  -6  -2    2.17    0.08
   2  -6  -1    2.13    0.08
   2   6   0    0.07    0.02
  -2  -6   0    0.08    0.02
   2  -6   0    0.09    0.02
   2   6   1    0.24    0.02
   2  -6   1    0.17    0.02
   2   6   2    1.18    0.05
   2  -6   2    1.16    0.05
   2   6   3    8.50    0.24
   2  -6   3    8.61    0.24
   2   6   4    0.70    0.04
   2  -6   4    0.70    0.04
   2   6   5    0.24    0.02
   2  -6   5    0.19    0.02
   2   6   6    0.56    0.03
   2  -6   6    0.60    0.03
   2   6   7    0.06    0.01
   2  -6   7    0.12    0.01
  -3   0  20    3.42    0.11
  -3   0  20    3.21    0.08
  -3   0  20    3.21    0.08
  -3   0  20    3.25    0.11
  -3   0  20    3.31    0.11
  -3   0  19    0.00    0.01
  -3   0  19    0.00    0.01
  -3   0  19    0.04    0.01
  -3   0  19    0.01    0.01
  -3   0  19    0.04    0.01
  -3   0  19    0.00    0.01
  -3   0  18    0.10    0.02
  -3   0  18    0.08    0.02
  -3   0  18    0.11    0.02
  -3   0  18    0.15    0.03
   3   0 -18    0.07    0.02
  -3   0  18    0.09    0.02
  -3   0  18    0.09    0.02
  -3   0  17    0.01    0.02
   3   0 -17    0.01    0.02
  -3   0  17    0.02    0.02
  -3   0  17    0.01    0.02
  -3   0  17    0.00    0.01
  -3   0  17    0.00    0.01
  -3   0  17    0.01    0.02
  -3   0  16    0.81    0.04
  -3   0  16    0.97    0.05
   3   0 -16    0.75    0.06
  -3   0  16    0.86    0.06
  -3   0  16    0.81    0.04
  -3   0  16    0.99    0.06
  -3   0  16    0.82    0.05
   3   0 -15    0.02    0.02
  -3   0  15    0.02    0.02
  -3   0  15    0.02    0.02
  -3   0  15    0.11    0.03
  -3   0  15    0.02    0.02
  -3   0  15    0.01    0.02
   3   0 -15    0.01    0.02
  -3   0  15    0.01    0.02
   3   0 -15    0.03    0.02
   3   0 -14    5.56    0.21
   3   0 -14    4.80    0.19
   3   0 -14    5.14    0.21
   3   0 -13    0.00    0.01
   3   0 -13    0.00    0.02
   3   0 -13    0.01    0.01
   3   0 -13    0.02    0.02
   3   0 -12    1.45    0.08
  -3   0  12    1.48    0.08
   3   0 -12    1.57    0.08
   3   0 -12    1.56    0.08
   3   0 -12    1.43    0.08
  -3   0  11    0.01    0.02
   3   0 -11    0.00    0.01
   3   0 -11    0.01    0.01
   3   0 -11    0.00    0.01
   3   0 -11    0.00    0.01
   3   0 -10    2.71    0.11
   3   0 -10    2.65    0.12
  -3   0  10    2.51    0.11
   3   0 -10    2.59    0.11
   3   0  -9    0.00    0.01
  -3   0   9    0.01    0.01
   3   0  -9   -0.01    0.01
   3   0  -9    0.01    0.01
   3   0  -8    1.88    0.09
   3   0  -8    1.94    0.06
   3   0  -8    1.94    0.08
   3   0  -8    1.94    0.06
   3   0  -8    1.89    0.08
  -3   0   8    1.87    0.08
   3   0  -7    0.02    0.01
   3   0  -7   -0.01    0.01
   3   0  -7   -0.01    0.01
   3   0  -7   -0.01    0.01
   3   0  -7   -0.01    0.01
   3   0  -7   -0.01    0.01
  -3   0   7    0.00    0.01
   3   0  -6    4.92    0.13
   3   0  -6    5.18    0.18
  -3   0   6    5.74    0.17
   3   0  -6    4.88    0.18
   3   0  -6    5.31    0.17
   3   0  -6    4.92    0.28
   3   0  -6    4.92    0.13
  -3   0   5   -0.07    0.01
   3   0  -5   -0.07    0.01
   3   0  -5   -0.07    0.01
  -3   0   5   -0.08    0.01
   3   0  -4  104.34    5.54
  -3   0   4  117.33    5.54
  -3   0   3   -0.15    0.01
   3   0  -3   -0.15    0.01
   3   0  -1    0.01    0.01
   3   0   0  102.98    5.57
  -3   0   0   97.37    5.00
   3   0   1   -0.05    0.01
  -3   0  -1   -0.04    0.01
  -3   0  -1   -0.06    0.01
   3   0   2    5.39    0.28
  -3   0  -2    5.24    0.32
  -3   0  -2    5.29    0.28
  -3   0  -4  281.14   15.34
  -3   0  -4  247.22   13.47
  -3   0  -5    0.01    0.01
   3   0   5    0.00    0.01
  -3   0  -5    0.03    0.01
  -3   0  -6   54.94    1.79
   3   0   6   56.36    1.62
  -3   0  -6   54.11    1.72
  -3   0  -6   54.39    1.62
   3   0   7    0.01    0.01
  -3   0  -7    0.02    0.01
  -3   0  -7    0.00    0.01
   3   0   8    2.70    0.11
  -3   0  -8    2.87    0.11
  -3   0  -8    2.87    0.10
   3   0   9    0.00    0.01
  -3   0  -9    0.01    0.01
  -3   0  -9    0.00    0.01
  -3   0 -10   18.37    0.62
  -3   0 -10   18.86    0.58
   3   0  10   18.50    0.58
   3   0  11    0.00    0.02
  -3   0 -11    0.00    0.01
  -3   0 -11    0.00    0.02
  -3   0 -12   14.85    0.50
  -3   0 -12   14.35    0.48
  -3   0 -13    0.01    0.01
   3   0  14    1.89    0.10
   3   0  14    1.92    0.07
   3   0  14    1.89    0.09
  -3   0 -14    1.83    0.09
   3   0  14    1.93    0.08
   3   0  14    1.92    0.07
   3   0  14    1.87    0.09
   3   0  15    0.02    0.02
   3   0  15    0.01    0.01
   3   0  15    0.01    0.01
   3   0  15    0.01    0.02
  -3   0 -15    0.00    0.01
   3   0  15    0.01    0.02
   3   0  15   -0.03    0.01
   3   0  16    0.57    0.05
  -3   0 -16    0.56    0.04
   3   0  16    0.55    0.05
   3   0  16    0.55    0.04
   3   0  16    0.56    0.04
   3   0  16    0.56    0.04
  -3   0 -17    0.02    0.01
   3   0  17   -0.01    0.01
   3   0  17    0.01    0.01
   3   0  17    0.01    0.02
   3   0  17    0.01    0.02
   3   0  17    0.01    0.01
   3   0  18    4.31    0.14
   3   0  18    4.44    0.11
   3   0  18    4.33    0.14
   3   0  18    4.39    0.14
   3   0  18    4.44    0.11
   3   0  19    0.01    0.01
   3   0  19    0.01    0.01
   3   0  19    0.01    0.01
   3   0  19    0.00    0.01
   3   0  19    0.01    0.01
  -3   1  20    2.18    0.08
  -3   1  20    2.19    0.07
  -3   1  20    2.16    0.08
   3   1 -20    2.04    0.08
  -3  -1  20    2.08    0.07
  -3  -1  20    2.21    0.06
  -3  -1  20    2.14    0.07
  -3  -1  20    2.10    0.08
  -3  -1  20    2.14    0.07
  -3  -1  20    2.21    0.06
  -3   1  19    2.80    0.09
  -3   1  19    2.87    0.10
  -3   1  19    2.76    0.10
  -3   1  19    2.75    0.10
  -3  -1  19    2.68    0.08
  -3  -1  19    2.96    0.11
  -3  -1  19    2.78    0.10
  -3  -1  19    2.68    0.08
  -3  -1  19    2.80    0.10
  -3  -1  19    2.78    0.10
  -3   1  18    3.83    0.13
  -3   1  18    3.75    0.13
   3   1 -18    4.00    0.15
  -3   1  18    3.50    0.10
  -3   1  18    3.72    0.13
  -3   1  18    3.50    0.10
  -3   1  18    3.95    0.13
  -3  -1  18    3.74    0.10
  -3  -1  18    3.98    0.13
  -3  -1  18    3.75    0.13
  -3  -1  18    3.70    0.14
  -3  -1  18    3.89    0.13
  -3  -1  18    3.74    0.10
   3  -1 -18    3.81    0.15
  -3   1  17    4.01    0.14
   3   1 -17    4.45    0.17
  -3   1  17    4.30    0.11
  -3   1  17    4.38    0.15
  -3   1  17    4.21    0.15
  -3   1  17    4.09    0.15
  -3   1  17    4.30    0.11
   3  -1 -17    4.07    0.17
  -3  -1  17    4.35    0.16
  -3  -1  17    4.20    0.15
  -3  -1  17    4.21    0.12
  -3  -1  17    4.21    0.12
  -3  -1  17    4.05    0.14
  -3  -1  17    4.09    0.14
  -3   1  16    0.70    0.05
   3   1 -16    0.76    0.06
  -3   1  16    0.71    0.04
  -3   1  16    0.71    0.04
  -3   1  16    0.72    0.05
  -3   1  16    0.72    0.05
  -3   1  16    0.77    0.05
  -3  -1  16    0.67    0.04
   3  -1 -16    0.67    0.05
  -3  -1  16    0.75    0.05
  -3  -1  16    0.67    0.05
  -3  -1  16    0.66    0.05
  -3  -1  16    0.67    0.04
  -3  -1  16    0.69    0.06
  -3  -1  16    0.67    0.04
  -3   1  15   10.49    0.32
  -3   1  15   10.69    0.30
  -3   1  15   10.66    0.32
  -3   1  15    9.93    0.25
   3   1 -15   10.09    0.36
  -3   1  15   10.05    0.32
  -3   1  15    9.93    0.25
  -3  -1  15   10.48    0.35
  -3  -1  15   10.63    0.32
  -3  -1  15   10.88    0.31
  -3  -1  15   10.68    0.32
  -3  -1  15   10.48    0.25
  -3  -1  15   10.27    0.30
  -3  -1  15   10.48    0.25
   3  -1 -15    9.77    0.35
  -3   1  14    4.21    0.18
   3   1 -14    4.41    0.17
   3   1 -14    4.09    0.19
   3   1 -14    4.08    0.19
   3  -1 -14    4.18    0.17
   3  -1 -14    4.26    0.18
   3  -1 -14    4.06    0.16
   3  -1 -14    4.15    0.18
   3   1 -13    0.66    0.06
  -3   1  13    0.66    0.06
   3   1 -13    0.64    0.05
   3   1 -13    0.61    0.06
   3  -1 -13    0.69    0.06
   3  -1 -13    0.65    0.06
   3  -1 -13    0.62    0.05
   3  -1 -13    0.66    0.05
   3   1 -12   10.71    0.38
  -3   1  12   11.19    0.37
   3   1 -12   10.77    0.37
   3  -1 -12   10.80    0.39
   3  -1 -12   10.50    0.38
   3  -1 -12   11.07    0.36
   3  -1 -12   10.73    0.36
  -3   1  11    5.95    0.21
   3   1 -11    5.44    0.22
   3   1 -11    5.54    0.22
   3   1 -11    5.46    0.22
   3   1 -11    5.85    0.21
   3  -1 -11    5.53    0.21
   3  -1 -11    5.61    0.22
   3  -1 -11    5.59    0.20
   3   1 -10    2.69    0.12
   3   1 -10    2.47    0.11
  -3   1  10    2.53    0.12
   3   1 -10    2.76    0.12
  -3   1  10    2.56    0.11
   3   1 -10    2.70    0.12
   3  -1 -10    2.60    0.12
   3  -1 -10    2.55    0.09
   3  -1 -10    2.49    0.11
   3  -1 -10    2.55    0.09
   3   1  -9    5.83    0.21
   3   1  -9    6.02    0.22
   3   1  -9    5.74    0.22
  -3   1   9    5.88    0.21
  -3   1   9    5.99    0.22
   3  -1  -9    5.96    0.17
   3  -1  -9    6.15    0.22
   3  -1  -9    5.96    0.17
   3  -1  -9    5.98    0.21
  -3   1   8  134.52    3.66
   3   1  -8  122.24    3.82
  -3   1   8  114.32    3.44
   3   1  -8  108.51    3.63
   3   1  -8  114.67    3.43
   3  -1  -8  112.61    3.63
   3  -1  -8  113.54    2.75
   3  -1  -8  113.54    2.75
   3  -1  -8  114.06    3.82
  -3   1   7    6.66    0.24
   3   1  -7    6.97    0.25
  -3   1   7    7.16    0.23
   3   1  -7    7.06    0.25
   3   1  -7    7.03    0.23
   3  -1  -7    6.88    0.18
   3  -1  -7    6.96    0.24
   3  -1  -7    6.88    0.18
   3  -1  -7    6.80    0.24
   3   1  -6    2.01    0.09
   3   1  -6    1.94    0.08
  -3   1   6    2.03    0.08
  -3   1   6    2.05    0.09
   3   1  -6    1.83    0.08
   3  -1  -6    1.84    0.06
   3  -1  -6    1.84    0.06
   3  -1  -6    1.84    0.08
   3  -1  -6    1.98    0.08
   3   1  -5    0.07    0.02
   3   1  -5    0.09    0.02
  -3   1   5    0.09    0.01
  -3   1   5    0.03    0.01
  -3   1   5    0.09    0.01
  -3   1   5    0.04    0.01
   3   1  -5    0.04    0.02
   3  -1  -5    0.10    0.01
   3  -1  -5    0.08    0.01
   3  -1  -5    0.08    0.01
   3  -1  -5    0.10    0.03
  -3   1   4    4.40    0.29
   3   1  -4    4.39    0.24
   3   1  -4    4.55    0.16
  -3   1   4    4.45    0.12
  -3   1   4    4.45    0.12
   3   1  -4    4.29    0.15
  -3   1   4    4.50    0.15
  -3   1   4    4.49    0.16
   3  -1  -4    4.30    0.12
   3  -1  -4    4.30    0.12
  -3  -1   4    4.14    0.24
   3  -1  -4    4.41    0.25
   3  -1  -4    4.33    0.16
  -3   1   3   72.17    3.41
  -3   1   3   66.67    3.90
   3   1  -3   63.40    3.38
  -3  -1   3   67.43    3.38
  -3   1   2   64.51    3.66
  -3   1   2   59.37    3.08
   3   1  -2   60.65    3.13
   3  -1  -2   62.80    3.13
  -3  -1   2   63.05    3.12
  -3   1   1    4.42    0.28
   3   1  -1    4.36    0.24
  -3   1   1    3.98    0.24
   3  -1  -1    4.28    0.24
  -3  -1   1    4.31    0.24
   3   1   0   20.15    0.96
  -3   1   0   17.51    0.95
   3  -1   0   18.85    0.95
  -3  -1   0   19.28    0.96
  -3   1  -1   40.72    1.79
   3   1   1   33.43    1.77
   3  -1   1   33.29    1.75
  -3  -1  -1   34.12    1.77
   3   1   2   53.83    3.05
   3   1   2   52.71    2.60
  -3  -1  -2   50.01    2.59
  -3  -1  -2   51.43    2.59
   3   1   3   20.19    0.48
   3   1   3   20.19    0.48
  -3   1  -3   19.35    0.66
   3   1   3   19.75    1.17
  -3  -1  -3   20.01    1.02
   3   1   4    4.17    0.14
   3   1   4    4.20    0.15
   3   1   4    4.10    0.12
  -3   1  -4    4.27    0.15
   3   1   4    4.12    0.27
   3   1   4    4.10    0.12
  -3  -1  -4    4.10    0.24
   3   1   5    0.56    0.04
   3   1   5    0.54    0.03
   3   1   5    0.49    0.03
  -3   1  -5    0.57    0.03
   3   1   5    0.49    0.03
  -3   1  -5    0.70    0.04
  -3  -1  -5    0.55    0.06
  -3   1  -6   32.79    1.05
   3   1   6   33.56    0.95
   3   1   6   32.27    1.02
   3   1   6   30.65    0.77
   3   1   6   30.65    0.77
  -3   1  -6   31.53    0.96
   3   1   7   33.76    1.10
  -3   1  -7   34.99    1.15
   3   1   7   35.21    0.84
   3   1   7   35.21    0.84
  -3   1  -7   34.53    1.04
   3   1   7   34.54    1.04
  -3   1  -8   26.40    0.80
   3   1   8   26.61    0.84
  -3   1  -8   25.93    0.87
   3   1   8   26.57    0.79
  -3  -1  -8   25.20    0.85
   3   1   9    1.77    0.09
  -3   1  -9    1.79    0.09
   3   1   9    1.91    0.09
  -3   1  -9    1.96    0.09
  -3  -1  -9    1.80    0.09
  -3  -1  -9    1.85    0.07
   3   1  10    0.02    0.02
  -3   1 -10    0.03    0.02
  -3   1 -10    0.03    0.01
   3   1  10    0.05    0.02
  -3   1 -10    0.06    0.02
  -3  -1 -10    0.02    0.02
  -3  -1 -10    0.05    0.01
  -3   1 -11    0.68    0.05
  -3   1 -11    0.58    0.05
   3   1  11    0.65    0.05
  -3   1 -11    0.60    0.05
  -3  -1 -11    0.66    0.04
  -3  -1 -11    0.65    0.05
   3   1  12    2.90    0.13
  -3   1 -12    2.67    0.13
  -3   1 -12    2.81    0.12
  -3  -1 -12    2.78    0.12
  -3  -1 -12    2.84    0.11
  -3   1 -13    0.20    0.04
   3   1  13    0.20    0.04
  -3   1 -13    0.21    0.03
  -3  -1 -13    0.22    0.04
  -3  -1 -13    0.21    0.03
   3   1  14    0.05    0.03
  -3   1 -14    0.02    0.02
   3   1  14    0.05    0.02
   3   1  14    0.03    0.02
   3  -1  14    0.14    0.02
   3  -1  14    0.05    0.02
   3  -1  14    0.02    0.02
   3  -1  14    0.03    0.02
   3  -1  14    0.03    0.02
   3  -1  14    0.14    0.02
  -3   1 -15    2.97    0.13
   3   1  15    2.92    0.12
   3   1  15    3.15    0.12
   3   1  15    2.93    0.12
   3  -1  15    3.08    0.09
   3  -1  15    3.00    0.12
   3  -1  15    2.87    0.11
   3  -1  15    2.91    0.11
   3  -1  15    3.08    0.09
   3  -1  15    2.81    0.13
   3   1  16    7.03    0.22
   3   1  16    6.80    0.22
   3   1  16    6.95    0.22
  -3   1 -16    7.06    0.26
   3  -1  16    7.37    0.25
   3  -1  16    7.05    0.18
   3  -1  16    6.85    0.22
   3  -1  16    7.05    0.18
   3  -1  16    7.35    0.22
   3  -1  16    6.94    0.23
  -3   1 -17    0.01    0.01
   3   1  17    0.01    0.02
   3   1  17    0.07    0.02
   3   1  17    0.03    0.02
   3  -1  17    0.00    0.02
   3  -1  17    0.02    0.01
   3  -1  17    0.02    0.01
   3  -1  17    0.10    0.02
   3  -1  17    0.01    0.02
   3  -1  17    0.04    0.02
   3   1  18    2.54    0.09
   3   1  18    2.56    0.09
   3   1  18    2.63    0.09
   3  -1  18    2.70    0.10
   3  -1  18    2.72    0.08
   3  -1  18    2.72    0.10
   3  -1  18    2.66    0.09
   3  -1  18    2.72    0.08
   3  -1  18    2.59    0.10
   3   1  19    0.68    0.03
   3   1  19    0.65    0.04
   3   1  19    0.67    0.03
   3  -1  19    0.70    0.03
   3  -1  19    0.57    0.03
   3  -1  19    0.65    0.04
   3  -1  19    0.66    0.03
   3  -1  19    0.65    0.04
   3  -1  19    0.66    0.03
  -3   2  19    1.43    0.06
  -3   2  19    1.39    0.06
  -3   2  19    1.44    0.05
   3   2 -19    1.53    0.06
  -3   2  19    1.37    0.06
  -3  -2  19    1.41    0.06
  -3  -2  19    1.54    0.05
  -3  -2  19    1.44    0.06
  -3  -2  19    1.54    0.05
  -3   2  18    6.36    0.20
  -3   2  18    6.19    0.20
  -3   2  18    6.66    0.19
  -3   2  18    6.40    0.20
  -3  -2  18    6.72    0.20
  -3  -2  18    6.68    0.16
  -3  -2  18    6.45    0.20
  -3  -2  18    6.68    0.16
  -3  -2  18    6.55    0.22
  -3   2  17    0.33    0.03
  -3   2  17    0.34    0.03
  -3   2  17    0.31    0.04
  -3   2  17    0.32    0.03
  -3  -2  17    0.41    0.04
  -3  -2  17    0.32    0.04
   3  -2 -17    0.45    0.04
  -3  -2  17    0.36    0.03
  -3  -2  17    0.25    0.03
  -3  -2  17    0.36    0.03
   3   2 -16    0.04    0.02
  -3   2  16    0.10    0.02
  -3   2  16    0.06    0.02
  -3   2  16    0.05    0.02
   3  -2 -16    0.02    0.02
  -3  -2  16    0.03    0.01
  -3  -2  16    0.04    0.02
  -3  -2  16    0.03    0.01
  -3  -2  16    0.10    0.02
  -3  -2  16    0.08    0.02
  -3   2  15    5.43    0.18
  -3   2  15    5.45    0.19
   3   2 -15    5.57    0.21
  -3   2  15    5.55    0.19
  -3   2  15    5.60    0.18
  -3  -2  15    5.34    0.18
  -3  -2  15    5.56    0.20
  -3  -2  15    5.43    0.18
  -3  -2  15    5.20    0.14
   3  -2 -15    5.24    0.20
  -3  -2  15    5.20    0.14
  -3   2  14   28.65    0.77
  -3   2  14   28.66    0.80
  -3   2  14   28.30    0.80
  -3   2  14   28.86    0.81
   3   2 -14   29.90    0.92
   3  -2 -14   28.80    0.91
  -3  -2  14   27.70    0.62
  -3  -2  14   27.93    0.79
  -3  -2  14   29.23    0.87
  -3  -2  14   27.70    0.62
  -3   2  13    7.91    0.29
   3   2 -13    8.20    0.29
   3   2 -13    7.70    0.31
   3  -2 -13    7.76    0.29
   3  -2 -13    8.10    0.28
   3  -2 -13    7.72    0.31
  -3   2  12    5.24    0.23
  -3   2  12    5.42    0.21
   3   2 -12    5.90    0.22
   3   2 -12    5.31    0.23
   3  -2 -12    5.65    0.21
   3  -2 -12    5.31    0.20
   3  -2 -12    5.86    0.23
   3  -2 -12    5.47    0.17
   3  -2 -12    5.47    0.17
   3   2 -11    0.23    0.05
   3   2 -11    0.11    0.03
  -3   2  11    0.10    0.03
  -3   2  11    0.08    0.03
   3  -2 -11    0.08    0.02
   3  -2 -11    0.07    0.02
   3  -2 -11    0.08    0.02
   3  -2 -11    0.09    0.03
   3  -2 -11    0.20    0.03
   3   2 -10    3.95    0.16
   3   2 -10    3.91    0.17
  -3   2  10    3.84    0.17
  -3   2  10    3.75    0.15
   3  -2 -10    3.62    0.16
   3  -2 -10    3.67    0.15
   3  -2 -10    3.67    0.14
   3  -2 -10    3.84    0.13
   3  -2 -10    3.84    0.13
  -3   2   9   47.80    1.43
   3   2  -9   46.45    1.44
  -3   2   9   48.89    1.52
   3   2  -9   46.33    1.48
   3  -2  -9   46.63    1.56
   3  -2  -9   48.51    1.15
   3  -2  -9   46.77    1.51
   3  -2  -9   47.28    1.47
   3  -2  -9   48.51    1.15
   3   2  -8    1.44    0.09
  -3   2   8    1.70    0.09
  -3   2   8    1.63    0.08
   3   2  -8    1.69    0.09
   3  -2  -8    1.64    0.07
   3  -2  -8    1.57    0.08
   3  -2  -8    1.64    0.07
   3   2  -7   39.89    1.33
   3   2  -7   40.44    1.26
  -3   2   7   41.70    1.32
  -3   2   7   42.89    1.00
  -3   2   7   42.08    1.24
  -3   2   7   42.89    1.00
   3  -2  -7   40.95    1.00
   3  -2  -7   41.13    1.37
   3  -2  -7   40.95    1.00
   3   2  -6    2.72    0.12
  -3   2   6    2.88    0.12
   3   2  -6    2.80    0.13
  -3   2   6    2.99    0.12
  -3   2   6    3.05    0.10
  -3   2   6    3.05    0.10
   3  -2  -6    3.05    0.10
   3  -2  -6    2.90    0.12
   3  -2  -6    3.05    0.10
   3   2  -5    6.98    0.24
  -3   2   5    6.33    0.23
   3   2  -5    6.52    0.23
  -3   2   5    6.15    0.22
  -3   2   5    6.43    0.18
  -3   2   5    6.43    0.18
   3  -2  -5    6.47    0.24
   3  -2  -5    6.63    0.18
   3  -2  -5    6.63    0.18
   3   2  -4   65.57    1.96
   3   2  -4   66.38    2.08
  -3   2   4   64.67    2.07
  -3   2   4   64.02    1.56
  -3   2   4   64.02    1.56
  -3   2   4   66.24    1.95
   3  -2  -4   68.70    1.56
   3  -2  -4   66.11    2.16
   3  -2  -4   68.70    1.56
  -3   2   3   20.66    0.66
  -3   2   3   19.71    0.62
   3   2  -3   20.09    0.49
   3   2  -3   20.09    0.49
  -3   2   3   19.83    0.50
   3   2  -3   20.17    0.66
  -3   2   3   19.83    0.50
   3   2  -3   20.39    1.04
   3   2  -3   20.40    0.63
   3  -2  -3   20.40    0.68
  -3  -2   3   20.96    1.04
   3  -2  -3   20.53    0.50
   3  -2  -3   20.53    0.50
   3   2  -2    0.28    0.02
   3   2  -2    0.26    0.04
  -3   2   2    0.24    0.03
  -3   2   2    0.27    0.05
  -3   2   2    0.28    0.02
   3   2  -2    0.30    0.04
   3   2  -2    0.28    0.02
   3   2  -2    0.26    0.03
  -3   2   2    0.28    0.02
  -3   2   2    0.24    0.02
   3  -2  -2    0.24    0.03
  -3  -2   2    0.31    0.03
  -3  -2   2    0.29    0.04
   3  -2  -2    0.28    0.04
   3  -2  -2    0.30    0.02
   3  -2  -2    0.30    0.02
   3   2  -1   14.60    0.75
  -3   2   1   14.30    0.35
   3   2  -1   14.30    0.45
   3   2  -1   15.14    0.48
  -3   2   1   14.30    0.35
   3   2  -1   14.52    0.36
  -3   2   1   14.01    0.44
  -3   2   1   13.96    0.46
   3   2  -1   14.52    0.36
   3  -2  -1   14.23    0.35
   3  -2  -1   14.23    0.35
   3  -2  -1   13.83    0.74
   3  -2  -1   13.79    0.49
  -3  -2   1   13.78    0.49
  -3  -2   1   14.63    0.75
   3   2   0    4.43    0.16
   3   2   0    4.64    0.13
   3   2   0    4.64    0.13
   3   2   0    4.42    0.27
  -3   2   0    4.42    0.15
   3   2   0    4.31    0.17
  -3  -2   0    4.33    0.17
   3  -2   0    4.40    0.25
   3  -2   0    4.22    0.12
  -3  -2   0    4.52    0.27
   3  -2   0    4.22    0.12
   3   2   1   17.64    0.56
   3   2   1   19.55    0.60
   3   2   1   17.60    0.45
   3   2   1   17.60    0.45
  -3   2  -1   18.72    0.56
  -3  -2  -1   17.83    0.61
   3   2   2    0.11    0.02
   3   2   2    0.09    0.02
  -3   2  -2    0.08    0.02
   3   2   2    0.10    0.02
   3   2   2    0.10    0.02
   3   2   3   22.42    0.55
   3   2   3   22.00    0.68
   3   2   3   23.80    0.73
  -3   2  -3   21.90    0.68
  -3   2  -3   21.95    0.75
   3   2   3   22.42    0.55
  -3  -2  -3   21.47    0.74
  -3   2  -4    0.17    0.03
   3   2   4    0.20    0.03
   3   2   4    0.15    0.02
   3   2   4    0.14    0.03
   3   2   4    0.15    0.02
  -3  -2  -4    0.12    0.02
   3   2   5   54.38    1.30
  -3   2  -5   53.80    1.62
   3   2   5   54.38    1.30
   3   2   5   55.58    1.73
   3   2   5   52.44    1.62
  -3   2  -5   55.80    1.80
  -3  -2  -5   54.97    1.78
   3   2   6    5.24    0.18
  -3   2  -6    5.17    0.21
   3   2   6    5.17    0.16
   3   2   6    5.17    0.16
   3   2   6    5.33    0.20
  -3   2  -6    5.21    0.19
  -3  -2  -6    5.07    0.19
   3   2   7    0.16    0.03
   3   2   7    0.19    0.03
   3   2   7    0.16    0.03
  -3   2  -7    0.18    0.03
  -3   2  -7    0.15    0.03
   3   2   7    0.19    0.03
  -3  -2  -7    0.18    0.02
   3   2   8    7.73    0.22
  -3   2  -8    8.03    0.27
   3   2   8    7.90    0.29
   3   2   8    7.73    0.22
  -3   2  -8    7.50    0.29
  -3   2  -8    7.50    0.27
   3   2   8    7.73    0.26
  -3   2  -9   32.25    1.06
   3   2   9   31.33    1.02
  -3   2  -9   31.03    0.99
   3   2   9   30.66    0.77
  -3   2  -9   30.68    0.96
   3   2   9   30.61    0.95
   3   2   9   30.66    0.77
  -3  -2  -9   30.94    0.77
  -3  -2  -9   30.94    0.77
  -3  -2  -9   31.96    1.02
   3   2  10   15.10    0.41
  -3   2 -10   16.39    0.57
   3   2  10   15.10    0.41
  -3   2 -10   15.91    0.52
   3   2  10   16.17    0.55
   3   2  10   16.13    0.51
  -3   2 -10   15.81    0.53
  -3  -2 -10   15.59    0.41
  -3  -2 -10   16.38    0.53
  -3  -2 -10   15.59    0.41
  -3   2 -11    0.96    0.07
   3   2  11    0.99    0.07
  -3   2 -11    0.95    0.08
   3   2  11    1.01    0.07
  -3  -2 -11    1.05    0.05
  -3  -2 -11    1.09    0.08
  -3   2 -12    3.96    0.18
   3   2  12    3.80    0.16
  -3   2 -12    3.79    0.16
   3   2  12    3.45    0.17
  -3  -2 -12    3.91    0.14
  -3   2 -13   11.75    0.41
   3   2  13   11.57    0.33
   3   2  13   11.63    0.35
   3  -2  13   11.66    0.34
   3  -2  13   12.07    0.35
   3  -2  13   12.17    0.39
   3  -2  13   11.55    0.28
   3  -2  13   11.60    0.35
   3  -2  13   11.55    0.28
  -3   2 -14    0.03    0.02
   3   2  14    0.02    0.02
   3  -2  14    0.05    0.02
   3  -2  14    0.05    0.02
   3  -2  14    0.09    0.02
   3  -2  14    0.05    0.02
   3  -2  14    0.06    0.03
   3  -2  14    0.05    0.02
  -3   2 -15    0.03    0.02
   3   2  15    0.04    0.02
   3  -2  15    0.06    0.02
   3  -2  15    0.06    0.02
   3  -2  15    0.05    0.02
   3  -2  15    0.04    0.02
   3  -2  15    0.02    0.02
   3  -2  15    0.05    0.02
  -3   2 -16    0.01    0.02
   3   2  16    0.00    0.02
   3  -2  16    0.02    0.01
   3  -2  16    0.01    0.02
   3  -2  16    0.02    0.01
   3  -2  16    0.02    0.02
   3  -2  16    0.00    0.02
   3  -2  16    0.01    0.02
   3   2  17    0.18    0.02
   3  -2  17    0.23    0.02
   3  -2  17    0.23    0.02
   3  -2  17    0.23    0.03
   3  -2  17    0.25    0.03
   3  -2  17    0.17    0.02
   3  -2  17    0.22    0.03
   3  -2  18    0.46    0.02
   3  -2  18    0.53    0.04
   3  -2  18    0.46    0.02
   3  -2  18    0.42    0.03
   3  -2  18    0.44    0.03
   3  -2  18    0.47    0.03
  -3   3  18    0.43    0.03
  -3   3  18    0.43    0.03
   3   3 -18    0.44    0.03
  -3   3  18    0.39    0.03
  -3  -3  18    0.44    0.03
  -3  -3  18    0.43    0.03
  -3   3  17    1.39    0.06
  -3   3  17    1.38    0.06
  -3   3  17    1.36    0.06
  -3  -3  17    1.31    0.06
  -3  -3  17    1.37    0.06
  -3   3  16    0.81    0.05
  -3   3  16    0.79    0.05
  -3   3  16    0.77    0.05
  -3  -3  16    0.85    0.05
  -3  -3  16    0.80    0.04
  -3   3  15    1.77    0.08
  -3   3  15    1.75    0.08
  -3   3  15    1.70    0.08
  -3  -3  15    1.62    0.08
   3  -3 -15    1.70    0.09
  -3  -3  15    1.66    0.07
  -3   3  14    5.08    0.18
  -3   3  14    5.36    0.18
  -3   3  14    5.33    0.17
  -3  -3  14    5.17    0.17
   3  -3 -14    5.25    0.20
  -3  -3  14    5.04    0.19
  -3   3  13    2.25    0.10
  -3   3  13    2.34    0.10
  -3   3  13    2.17    0.09
  -3  -3  13    2.27    0.09
  -3  -3  13    2.30    0.11
   3  -3 -13    2.27    0.11
  -3   3  12    1.24    0.07
  -3   3  12    1.25    0.07
  -3   3  12    1.20    0.07
  -3  -3  12    1.19    0.06
   3  -3 -12    1.21    0.07
  -3  -3  12    1.24    0.07
   3   3 -11   16.20    0.56
  -3   3  11   15.44    0.56
  -3   3  11   15.71    0.52
   3  -3 -11   15.77    0.53
   3  -3 -11   16.34    0.43
   3  -3 -11   15.79    0.56
   3  -3 -11   16.34    0.43
   3  -3 -11   16.06    0.56
  -3   3  10   10.88    0.38
   3   3 -10   11.24    0.41
  -3   3  10   11.07    0.41
   3  -3 -10   11.29    0.41
   3  -3 -10   11.41    0.32
   3  -3 -10   11.54    0.41
   3  -3 -10   11.31    0.39
   3  -3 -10   11.41    0.32
  -3   3   9    3.57    0.16
   3   3  -9    3.49    0.17
  -3   3   9    3.76    0.15
   3  -3  -9    3.64    0.13
   3  -3  -9    3.62    0.15
   3  -3  -9    3.64    0.13
   3  -3  -9    3.32    0.15
   3   3  -8    0.12    0.04
  -3   3   8    0.13    0.03
  -3   3   8    0.10    0.03
   3  -3  -8    0.08    0.02
   3  -3  -8    0.12    0.03
   3  -3  -8    0.16    0.03
   3  -3  -8    0.08    0.02
  -3   3   7    5.43    0.17
  -3   3   7    5.47    0.22
  -3   3   7    5.43    0.17
  -3   3   7    5.35    0.20
   3   3  -7    5.71    0.23
   3  -3  -7    5.50    0.17
   3  -3  -7    5.51    0.20
   3  -3  -7    5.42    0.22
   3  -3  -7    5.50    0.17
  -3   3   6    5.56    0.21
  -3   3   6    5.88    0.18
   3   3  -6    5.69    0.23
  -3   3   6    5.88    0.18
   3   3  -6    6.31    0.25
  -3   3   6    5.58    0.23
   3  -3  -6    5.89    0.18
   3  -3  -6    5.92    0.23
   3  -3  -6    5.89    0.18
   3  -3  -6    5.71    0.21
  -3   3   5   10.80    0.36
   3   3  -5   10.73    0.39
  -3   3   5   10.94    0.30
   3   3  -5   11.21    0.38
  -3   3   5   10.94    0.30
  -3   3   5   11.09    0.39
   3  -3  -5   10.92    0.37
   3  -3  -5   11.08    0.29
   3  -3  -5   10.82    0.39
   3  -3  -5   11.08    0.29
   3   3  -4   26.03    0.81
  -3   3   4   25.37    0.63
  -3   3   4   25.96    0.84
   3   3  -4   24.80    0.85
  -3   3   4   25.37    0.63
  -3   3   4   25.55    0.79
   3  -3  -4   26.03    0.63
   3  -3  -4   25.73    0.87
   3  -3  -4   26.03    0.63
   3  -3  -4   25.52    0.81
  -3   3   3    3.93    0.12
   3   3  -3    3.91    0.17
   3   3  -3    3.87    0.16
  -3   3   3    3.96    0.15
  -3   3   3    3.93    0.12
  -3   3   3    3.90    0.16
   3  -3  -3    3.96    0.12
   3  -3  -3    4.04    0.17
   3  -3  -3    3.96    0.12
   3   3  -2   10.69    0.37
  -3   3   2   10.73    0.29
   3   3  -2   10.80    0.39
  -3   3   2   11.21    0.38
  -3   3   2   10.73    0.29
  -3   3   2   11.16    0.36
   3  -3  -2   11.19    0.29
   3  -3  -2   11.19    0.29
   3  -3  -2   10.82    0.39
   3   3  -1    8.07    0.29
   3   3  -1    7.63    0.22
  -3   3   1    7.84    0.27
   3   3  -1    7.97    0.28
   3   3  -1    7.63    0.22
  -3  -3   1    7.83    0.30
   3   3   0   45.29    1.42
   3   3   0   43.20    1.06
   3   3   0   42.44    1.33
   3   3   0   43.20    1.06
  -3   3   0   45.02    1.33
  -3  -3   0   45.43    1.47
   3   3   1    3.39    0.12
   3   3   1    3.43    0.14
  -3   3  -1    3.55    0.14
   3   3   1    3.55    0.16
   3   3   1    3.39    0.12
  -3  -3  -1    3.50    0.15
   3   3   2   35.82    0.89
   3   3   2   36.52    1.18
   3   3   2   35.60    1.11
  -3   3  -2   36.37    1.11
   3   3   2   35.82    0.89
  -3  -3  -2   39.05    1.23
   3   3   3    0.07    0.02
   3   3   3    0.18    0.03
   3   3   3    0.08    0.02
  -3   3  -3    0.08    0.02
   3   3   3    0.08    0.02
  -3  -3  -3    0.06    0.02
   3   3   4    7.07    0.22
  -3   3  -4    7.50    0.26
   3   3   4    7.56    0.26
   3   3   4    7.31    0.28
   3   3   4    7.07    0.22
  -3  -3  -4    7.40    0.28
  -3  -3  -4    7.24    0.25
   3   3   5    1.07    0.06
  -3   3  -5    1.12    0.07
   3   3   5    1.07    0.06
   3   3   5    1.16    0.08
   3   3   5    1.16    0.07
  -3  -3  -5    1.20    0.06
  -3  -3  -5    1.03    0.07
   3   3   6   34.03    0.84
   3   3   6   32.63    1.10
   3   3   6   34.80    1.03
  -3   3  -6   31.47    1.03
   3   3   6   34.03    0.84
  -3  -3  -6   33.91    1.12
   3   3   7    0.00    0.02
   3   3   7    0.01    0.02
   3   3   7    0.01    0.02
  -3   3  -7    0.01    0.02
   3   3   7    0.01    0.02
   3   3   8    0.35    0.05
  -3   3  -8    0.31    0.05
  -3   3  -8    0.25    0.04
   3   3   8    0.33    0.04
   3   3   8    0.29    0.04
   3   3   8    0.29    0.04
  -3  -3  -8    0.32    0.04
  -3  -3  -8    0.32    0.04
  -3  -3  -8    0.32    0.03
   3   3   9   26.92    0.68
  -3   3  -9   25.94    0.86
   3   3   9   26.72    0.89
   3   3   9   26.92    0.68
  -3  -3  -9   26.52    0.68
  -3  -3  -9   26.88    0.90
  -3  -3  -9   26.52    0.68
  -3   3 -10   12.33    0.46
   3   3  10   13.69    0.37
   3   3  10   12.81    0.44
   3   3  10   13.69    0.37
   3   3  10   12.59    0.48
  -3  -3 -10   13.62    0.46
  -3  -3 -10   14.14    0.37
  -3  -3 -10   14.14    0.37
  -3   3 -11    3.07    0.14
   3   3  11    3.04    0.11
   3  -3  11    2.98    0.11
   3  -3  11    2.94    0.11
  -3   3 -12    5.38    0.21
   3   3  12    5.13    0.17
   3  -3  12    5.14    0.17
   3  -3  12    5.26    0.17
   3  -3  12    5.17    0.19
   3   3  13    1.58    0.07
  -3   3 -13    1.47    0.09
   3  -3  13    1.67    0.07
   3  -3  13    1.59    0.07
   3  -3  13    1.73    0.09
   3   3  14    4.16    0.13
   3  -3  14    4.12    0.14
   3  -3  14    4.13    0.13
   3  -3  14    3.79    0.15
   3   3  15    3.40    0.11
   3  -3  15    3.15    0.11
   3  -3  15    3.40    0.13
   3  -3  15    3.25    0.11
   3   3  16    0.17    0.02
   3  -3  16    0.19    0.02
   3  -3  16    0.18    0.02
   3  -3  16    0.22    0.03
   3  -3  17    0.42    0.03
   3  -3  17    0.43    0.03
   3  -3  17    0.36    0.03
  -3   4  16    6.68    0.18
  -3   4  16    6.44    0.19
  -3   4  15    2.31    0.08
  -3   4  15    2.35    0.09
  -3  -4  15    2.41    0.08
  -3   4  14    2.56    0.09
  -3   4  14    2.68    0.10
  -3  -4  14    2.65    0.09
  -3   4  13    0.51    0.04
  -3   4  13    0.50    0.04
  -3   4  13    0.50    0.04
   3  -4 -13    0.42    0.04
  -3  -4  13    0.44    0.03
  -3   4  12    1.32    0.07
  -3   4  12    1.41    0.07
  -3   4  12    1.42    0.08
   3  -4 -12    1.41    0.08
  -3  -4  12    1.43    0.06
  -3   4  11    0.05    0.02
  -3   4  11    0.04    0.02
   3  -4 -11    0.07    0.02
  -3  -4  11    0.03    0.02
  -3   4  10    0.25    0.03
  -3   4  10    0.32    0.04
   3  -4 -10    0.26    0.04
  -3  -4  10    0.30    0.03
  -3   4   9    9.01    0.28
  -3   4   9    9.15    0.29
  -3  -4   9    9.17    0.27
   3  -4  -9    9.37    0.33
  -3   4   8    3.76    0.16
  -3   4   8    3.70    0.17
  -3   4   8    3.65    0.13
   3   4  -8    3.80    0.19
  -3   4   8    3.63    0.14
  -3  -4   8    3.60    0.13
   3  -4  -8    3.70    0.14
   3  -4  -8    3.70    0.14
   3  -4  -8    3.79    0.16
   3  -4  -8    3.72    0.17
  -3   4   7    0.28    0.05
   3   4  -7    0.31    0.06
  -3   4   7    0.26    0.04
   3  -4  -7    0.23    0.04
   3  -4  -7    0.27    0.04
   3  -4  -7    0.27    0.04
   3  -4  -7    0.24    0.04
  -3   4   6    0.02    0.02
   3   4  -6    0.01    0.02
  -3   4   6    0.05    0.03
   3  -4  -6    0.07    0.02
   3  -4  -6    0.07    0.02
   3  -4  -6    0.05    0.02
   3  -4  -6    0.03    0.02
  -3   4   5    5.37    0.22
  -3   4   5    5.53    0.24
   3   4  -5    5.49    0.23
   3  -4  -5    5.55    0.18
   3  -4  -5    5.67    0.22
   3  -4  -5    5.55    0.18
  -3   4   4   11.43    0.31
  -3   4   4   11.05    0.39
  -3   4   4   11.43    0.31
   3   4  -4   11.88    0.41
   3  -4  -4   11.11    0.31
   3  -4  -4   10.84    0.39
   3  -4  -4   11.11    0.31
  -3   4   3    0.60    0.05
   3   4  -3    0.51    0.07
   3  -4  -3    0.52    0.05
   3   4  -2    0.87    0.07
  -3   4   2    0.89    0.07
   3   4  -2    0.94    0.08
   3   4  -1   29.34    0.99
   3   4  -1   29.84    0.93
  -3   4   1   30.34    0.93
  -3  -4   1   28.76    0.93
   3   4   0    6.83    0.28
   3   4   0    7.42    0.27
  -3   4   0    6.91    0.26
  -3  -4   0    7.19    0.25
   3   4   1    4.27    0.18
  -3   4  -1    4.32    0.18
   3   4   1    4.13    0.20
   3   4   1    4.42    0.15
   3   4   1    4.42    0.15
  -3  -4  -1    4.32    0.17
  -3  -4  -1    4.28    0.20
   3   4   2    0.79    0.05
  -3   4  -2    0.66    0.06
   3   4   2    0.73    0.07
   3   4   2    0.69    0.06
   3   4   2    0.79    0.05
  -3  -4  -2    0.67    0.06
  -3  -4  -2    0.76    0.05
   3   4   3    3.93    0.14
   3   4   3    3.93    0.14
   3   4   3    4.06    0.17
  -3   4  -3    4.10    0.18
   3   4   3    3.99    0.19
  -3  -4  -3    4.08    0.16
  -3  -4  -3    3.97    0.19
   3   4   4    2.18    0.10
   3   4   4    2.18    0.10
  -3   4  -4    2.23    0.12
   3   4   4    2.32    0.13
   3   4   4    2.37    0.12
  -3  -4  -4    2.13    0.10
  -3   4  -5    3.41    0.16
   3   4   5    3.29    0.13
   3   4   5    3.29    0.13
   3   4   5    3.29    0.15
   3   4   5    3.66    0.18
  -3  -4  -5    3.41    0.13
  -3  -4  -5    3.32    0.16
  -3  -4  -5    3.54    0.14
  -3  -4  -5    3.41    0.13
   3   4   6   10.49    0.36
   3   4   6    9.70    0.39
   3   4   6    9.94    0.30
   3   4   6    9.94    0.30
  -3  -4  -6   10.49    0.35
  -3  -4  -6   10.21    0.30
  -3  -4  -6   10.21    0.30
  -3  -4  -6   10.13    0.38
   3   4   7   11.04    0.33
   3   4   7   11.59    0.43
   3   4   7   11.97    0.34
   3   4   7   11.53    0.40
   3   4   7   11.97    0.34
  -3  -4  -7   11.61    0.33
  -3  -4  -7   11.66    0.40
  -3  -4  -7   11.29    0.43
  -3  -4  -7   11.61    0.33
   3  -4   7   11.99    0.34
   3   4   8    0.31    0.04
   3  -4   8    0.29    0.03
  -3  -4  -8    0.25    0.04
   3   4   9    6.89    0.21
   3  -4   9    6.62    0.21
   3  -4   9    6.87    0.21
  -3  -4  -9    6.95    0.25
   3   4  10    3.24    0.12
   3  -4  10    3.26    0.11
   3  -4  10    3.42    0.12
  -3  -4 -10    3.17    0.14
   3   4  11    4.16    0.14
   3  -4  11    4.00    0.13
   3  -4  11    3.91    0.13
  -3  -4 -11    4.03    0.16
   3   4  12    0.20    0.03
   3  -4  12    0.17    0.02
  -3  -4 -12    0.25    0.03
   3  -4  12    0.18    0.02
   3   4  13    1.07    0.05
   3  -4  13    0.91    0.05
   3  -4  13    0.93    0.05
   3   4  14    0.60    0.03
   3  -4  14    0.61    0.03
   3  -4  14    0.61    0.03
   3   4  15    0.03    0.01
   3  -4  15    0.01    0.01
  -3   5  13    3.19    0.10
  -3   5  13    3.27    0.10
  -3   5  12    1.34    0.06
  -3   5  12    1.31    0.05
  -3   5  11    1.59    0.07
  -3   5  11    1.66    0.07
  -3  -5  11    1.66    0.06
  -3   5  10    0.21    0.03
  -3   5  10    0.17    0.02
  -3  -5  10    0.27    0.02
  -3   5   9    1.25    0.06
  -3   5   9    1.33    0.07
  -3  -5   9    1.33    0.06
   3  -5  -9    1.23    0.07
  -3   5   8    9.05    0.28
  -3   5   8    9.41    0.27
   3  -5  -8    9.25    0.33
  -3   5   7    1.44    0.07
  -3   5   7    1.45    0.07
   3  -5  -7    1.53    0.08
  -3   5   6    1.15    0.06
  -3   5   6    1.07    0.06
  -3   5   5    4.04    0.14
   3  -5  -5    3.38    0.13
   3   5  -4    1.07    0.05
  -3   5   4    1.16    0.06
   3  -5  -4    1.10    0.06
  -3  -5   4    1.06    0.05
  -3   5   3    3.21    0.12
   3   5  -3    3.10    0.11
   3  -5  -3    3.19    0.12
   3   5  -2    0.76    0.05
  -3   5   2    0.75    0.05
   3  -5  -2    0.76    0.05
  -3   5   1    6.20    0.19
   3   5  -1    5.62    0.18
   3  -5  -1    6.00    0.19
   3   5   0    0.09    0.02
  -3   5   0    0.15    0.03
   3  -5   0    0.12    0.03
   3   5   1    4.13    0.14
   3  -5   1    4.19    0.14
   3   5   2   12.04    0.34
   3  -5   2   11.91    0.35
  -3  -5  -2   12.02    0.41
   3   5   3    5.38    0.17
   3  -5   3    5.57    0.18
  -3  -5  -3    5.55    0.21
   3   5   4    0.23    0.03
  -3  -5  -4    0.14    0.03
   3  -5   4    0.16    0.03
   3   5   5    1.70    0.08
   3  -5   5    1.86    0.07
  -3  -5  -5    1.76    0.09
   3   5   6    1.05    0.06
   3  -5   6    1.19    0.06
  -3  -5  -6    1.14    0.07
   3   5   7    3.79    0.13
   3  -5   7    3.99    0.13
  -3  -5  -7    3.79    0.15
   3   5   8    4.22    0.14
  -3  -5  -8    3.85    0.16
   3  -5   8    4.17    0.13
   3   5   9    4.88    0.16
   3  -5   9    5.21    0.16
   3   5  10    0.07    0.02
   3  -5  10    0.08    0.02
   3   5  11    0.02    0.01
   3  -5  11    0.00    0.01
   3   5  12    0.05    0.01
   3  -5  12    0.03    0.01
  -3   6   8    0.03    0.01
   3  -6  -8    0.04    0.01
  -3   6   7    1.95    0.07
   3  -6  -7    1.86    0.07
  -3   6   6    2.51    0.09
   3  -6  -6    2.47    0.08
   3  -6  -5    1.59    0.06
   3  -6  -4    1.89    0.07
   3  -6  -3    0.38    0.03
   3   6  -2   18.43    0.48
  -3  -6   2   17.87    0.48
   3  -6  -2   18.48    0.50
   3   6  -1    1.90    0.07
  -3  -6   1    1.87    0.07
   3  -6  -1    2.02    0.07
   3   6   0    2.82    0.09
   3  -6   0    2.81    0.10
  -3  -6   0    2.84    0.09
   3   6   1    0.04    0.01
   3  -6   1    0.03    0.01
   3   6   2    0.97    0.04
   3  -6   2    0.94    0.04
   3   6   3    1.42    0.06
   3  -6   3    1.47    0.06
   3   6   4    0.00    0.01
   3  -6   4    0.03    0.01
   3   6   5    0.03    0.01
   3  -6   5    0.03    0.01
   3   6   6    0.83    0.04
   3  -6   6    0.77    0.04
   3   6   7    2.71    0.09
   3  -6   7    2.87    0.09
  -4   0  20    5.21    0.12
  -4   0  20    4.79    0.15
  -4   0  20    4.96    0.15
  -4   0  20    5.21    0.12
  -4   0  20    4.92    0.15
  -4   0  19    0.02    0.01
  -4   0  19    0.00    0.01
  -4   0  19    0.04    0.02
  -4   0  19    0.00    0.01
  -4   0  19    0.00    0.01
  -4   0  19   -0.02    0.01
  -4   0  18   13.73    0.40
  -4   0  18   13.78    0.32
  -4   0  18   13.78    0.32
   4   0 -18   14.06    0.47
  -4   0  18   14.29    0.39
  -4   0  18   13.85    0.41
  -4   0  18   14.41    0.41
  -4   0  17    0.03    0.02
  -4   0  17    0.05    0.02
   4   0 -17    0.01    0.02
  -4   0  17    0.05    0.02
  -4   0  17    0.02    0.02
  -4   0  17   -0.02    0.02
  -4   0  17    0.01    0.02
  -4   0  16   15.77    0.36
  -4   0  16   16.46    0.47
  -4   0  16   15.75    0.44
   4   0 -16   16.45    0.53
  -4   0  16   15.66    0.46
  -4   0  16   15.77    0.36
  -4   0  16   15.35    0.46
  -4   0  15    0.03    0.02
  -4   0  15    0.02    0.01
   4   0 -15   -0.01    0.02
  -4   0  15    0.02    0.02
  -4   0  15    0.03    0.02
  -4   0  15    0.02    0.01
   4   0 -15    0.02    0.02
  -4   0  15    0.02    0.02
   4   0 -14    0.62    0.06
   4   0 -14    0.61    0.05
   4   0 -14    0.71    0.06
   4   0 -14    0.60    0.05
   4   0 -13    0.00    0.02
   4   0 -13    0.01    0.01
   4   0 -13    0.00    0.02
   4   0 -13    0.00    0.01
   4   0 -12   14.67    0.48
  -4   0  12   14.28    0.48
   4   0 -12   14.63    0.49
   4   0 -12   15.23    0.51
   4   0 -12   15.53    0.52
   4   0 -11   -0.01    0.01
   4   0 -11    0.00    0.01
   4   0 -11    0.00    0.01
   4   0 -11    0.04    0.02
  -4   0  11    0.00    0.01
   4   0 -10   10.73    0.37
  -4   0  10   10.68    0.35
   4   0 -10   10.32    0.37
   4   0 -10   10.57    0.35
   4   0  -9    0.00    0.01
   4   0  -9    0.04    0.01
   4   0  -9    0.05    0.02
   4   0  -8    1.05    0.06
   4   0  -8    1.39    0.05
  -4   0   8    1.07    0.06
   4   0  -8    1.39    0.05
   4   0  -8    1.02    0.06
   4   0  -8    0.96    0.06
   4   0  -7    0.02    0.01
  -4   0   7    0.01    0.01
   4   0  -7    0.01    0.01
   4   0  -7    0.00    0.01
   4   0  -7    0.01    0.01
   4   0  -7    0.02    0.01
   4   0  -7    0.00    0.01
   4   0  -6  126.80    3.78
   4   0  -6  118.94    4.16
   4   0  -6  135.61    3.01
   4   0  -6  135.61    3.01
  -4   0   6  119.07    3.77
   4   0  -5    0.00    0.01
  -4   0   5    0.00    0.02
   4   0  -5    0.00    0.01
  -4   0   5    0.00    0.01
   4   0  -5   -0.02    0.01
  -4   0   4   36.26    1.85
   4   0  -4   37.85    1.85
  -4   0   3    0.00    0.01
   4   0  -3    0.01    0.01
   4   0  -2    0.78    0.05
   4   0  -1    0.02    0.01
  -4   0   1    0.01    0.01
  -4   0   0   24.35    1.23
   4   0   0   24.60    1.22
  -4   0  -1   -0.06    0.01
   4   0   1   -0.06    0.01
  -4   0  -2   71.95    3.73
   4   0   2   74.91    4.30
  -4   0  -2   76.52    4.34
  -4   0  -3    0.00    0.01
   4   0   3    0.01    0.01
  -4   0  -3    0.01    0.01
  -4   0  -3    0.01    0.01
  -4   0  -4    3.50    0.21
  -4   0  -4    4.03    0.21
  -4   0  -4    4.04    0.25
   4   0   5   -0.01    0.01
  -4   0  -5    0.02    0.00
  -4   0  -5   -0.02    0.01
  -4   0  -5    0.04    0.02
   4   0   6   44.87    1.34
  -4   0  -6   45.90    1.48
  -4   0  -6   45.46    1.34
   4   0   7    0.06    0.02
  -4   0  -7    0.04    0.01
  -4   0  -8   53.94    1.65
   4   0   8   56.65    1.65
  -4   0  -8   56.67    1.81
  -4   0  -9    0.01    0.01
  -4   0  -9    0.00    0.01
   4   0   9   -0.01    0.01
  -4   0 -10    2.82    0.11
  -4   0 -10    2.78    0.12
   4   0  10    2.64    0.12
  -4   0 -11    0.04    0.01
  -4   0 -12   46.15    1.52
  -4   0 -13    0.00    0.01
   4   0  14   25.71    0.57
   4   0  14   25.51    0.72
   4   0  14   25.01    0.78
   4   0  14   25.71    0.57
   4   0  14   25.90    0.72
   4   0  14   25.82    0.71
   4   0  15    0.00    0.02
   4   0  15   -0.03    0.01
   4   0  15    0.00    0.02
  -4   0 -15    0.00    0.01
   4   0  15    0.02    0.02
   4   0  15   -0.03    0.01
  -4   0 -16    0.26    0.03
   4   0  16    0.29    0.03
   4   0  16    0.26    0.03
   4   0  16    0.30    0.04
   4   0  16    0.28    0.03
   4   0  16    0.29    0.03
   4   0  17    0.01    0.02
   4   0  17    0.00    0.01
   4   0  17    0.01    0.02
   4   0  17    0.02    0.02
  -4   0 -17    0.01    0.01
   4   0  17    0.00    0.01
   4   0  18    0.98    0.05
   4   0  18    1.05    0.04
   4   0  18    1.05    0.04
   4   0  18    1.06    0.05
   4   0  18    1.13    0.05
   4   0  19    0.01    0.01
   4   0  19    0.00    0.01
   4   0  19    0.02    0.01
   4   0  19    0.01    0.01
   4   0  19    0.00    0.01
  -4   1  20    0.04    0.01
  -4   1  20    0.07    0.01
  -4   1  20    0.05    0.01
  -4   1  20    0.04    0.01
   4   1 -20    0.02    0.01
  -4  -1  20    0.04    0.01
  -4  -1  20    0.02    0.01
  -4  -1  20    0.04    0.01
  -4  -1  20    0.03    0.01
  -4  -1  20    0.04    0.01
  -4  -1  20    0.04    0.01
  -4   1  19    0.87    0.05
  -4   1  19    0.86    0.05
  -4   1  19    0.74    0.03
   4   1 -19    0.80    0.05
  -4   1  19    0.80    0.05
  -4   1  19    0.84    0.04
  -4   1  19    0.74    0.03
  -4  -1  19    0.80    0.04
  -4  -1  19    0.80    0.04
  -4  -1  19    0.73    0.05
  -4  -1  19    0.76    0.04
  -4  -1  19    0.77    0.04
  -4  -1  19    0.90    0.05
  -4   1  18    2.52    0.10
  -4   1  18    2.66    0.08
  -4   1  18    2.66    0.08
  -4   1  18    2.52    0.10
   4   1 -18    2.22    0.11
  -4   1  18    2.45    0.09
  -4   1  18    2.35    0.10
  -4  -1  18    2.58    0.10
  -4  -1  18    2.45    0.10
  -4  -1  18    2.45    0.09
   4  -1 -18    2.46    0.11
  -4  -1  18    2.48    0.10
  -4  -1  18    2.39    0.09
  -4  -1  18    2.51    0.08
  -4  -1  18    2.51    0.08
  -4   1  17    6.97    0.21
  -4   1  17    6.86    0.22
  -4   1  17    6.72    0.17
   4   1 -17    7.15    0.25
  -4   1  17    7.08    0.22
  -4   1  17    6.55    0.22
  -4   1  17    6.72    0.17
   4  -1 -17    6.62    0.25
  -4  -1  17    6.84    0.22
  -4  -1  17    6.77    0.17
  -4  -1  17    6.91    0.24
  -4  -1  17    7.00    0.20
  -4  -1  17    6.70    0.21
  -4  -1  17    6.77    0.17
  -4  -1  17    6.57    0.21
  -4   1  16    0.58    0.03
  -4   1  16    0.58    0.03
  -4   1  16    0.65    0.05
   4   1 -16    0.53    0.05
  -4   1  16    0.60    0.05
  -4   1  16    0.59    0.05
  -4   1  16    0.61    0.05
  -4  -1  16    0.62    0.05
  -4  -1  16    0.53    0.04
  -4  -1  16    0.66    0.04
   4  -1 -16    0.60    0.05
  -4  -1  16    0.54    0.05
  -4  -1  16    0.65    0.05
  -4  -1  16    0.66    0.04
  -4  -1  16    0.56    0.04
   4   1 -15   32.88    0.99
  -4   1  15   31.63    0.86
  -4   1  15   30.58    0.86
  -4   1  15   30.30    0.86
  -4   1  15   30.22    0.67
  -4   1  15   30.22    0.67
  -4   1  15   30.45    0.82
  -4  -1  15   30.66    0.86
  -4  -1  15   30.65    0.67
  -4  -1  15   30.65    0.67
   4  -1 -15   30.52    0.98
  -4  -1  15   31.67    0.85
  -4  -1  15   30.59    0.86
  -4  -1  15   30.01    0.81
  -4  -1  15   31.98    0.94
  -4   1  14    2.18    0.11
   4   1 -14    2.23    0.11
   4   1 -14    1.99    0.12
   4   1 -14    2.07    0.12
   4  -1 -14    2.34    0.11
   4  -1 -14    2.11    0.11
   4  -1 -14    2.05    0.10
   4  -1 -14    2.09    0.12
   4   1 -13    0.08    0.03
   4   1 -13    0.10    0.03
   4   1 -13    0.10    0.02
  -4   1  13    0.14    0.03
   4  -1 -13    0.10    0.02
   4  -1 -13    0.12    0.02
   4  -1 -13    0.11    0.03
   4  -1 -13    0.12    0.03
  -4   1  12    3.00    0.13
   4   1 -12    2.68    0.12
   4   1 -12    2.76    0.14
   4   1 -12    2.81    0.14
   4   1 -12    3.13    0.14
   4  -1 -12    2.87    0.12
   4  -1 -12    2.81    0.13
   4  -1 -12    3.11    0.13
   4  -1 -12    2.88    0.14
   4   1 -11    1.66    0.09
  -4   1  11    1.63    0.09
   4   1 -11    1.56    0.08
   4   1 -11    1.76    0.09
   4   1 -11    1.64    0.09
   4  -1 -11    1.71    0.09
   4  -1 -11    1.64    0.08
   4  -1 -11    1.72    0.08
   4  -1 -11    1.61    0.07
   4  -1 -11    1.61    0.07
  -4   1  10    0.48    0.04
   4   1 -10    0.58    0.04
  -4   1  10    0.48    0.04
   4   1 -10    0.50    0.05
   4   1 -10    0.52    0.04
   4   1 -10    0.54    0.05
   4  -1 -10    0.48    0.04
   4  -1 -10    0.49    0.04
   4  -1 -10    0.41    0.03
   4  -1 -10    0.45    0.04
   4  -1 -10    0.41    0.03
   4   1  -9   18.29    0.58
  -4   1   9   17.81    0.60
  -4   1   9   18.26    0.57
   4   1  -9   18.45    0.61
   4   1  -9   18.40    0.63
   4  -1  -9   18.04    0.60
   4  -1  -9   18.61    0.45
   4  -1  -9   17.86    0.61
   4  -1  -9   18.61    0.45
  -4   1   8    0.08    0.02
   4   1  -8    0.10    0.02
   4   1  -8    0.09    0.02
   4  -1  -8    0.06    0.02
   4  -1  -8    0.08    0.02
   4  -1  -8    0.08    0.02
   4  -1  -8    0.12    0.02
   4   1  -7    6.50    0.23
  -4   1   7    6.41    0.23
   4   1  -7    6.36    0.22
   4   1  -7    6.39    0.24
  -4   1   7    6.55    0.21
   4  -1  -7    6.57    0.23
   4  -1  -7    6.58    0.23
   4  -1  -7    6.38    0.17
   4  -1  -7    6.39    0.17
  -4   1   6   53.34    1.66
   4   1  -6   51.67    2.63
  -4   1   6   52.85    1.56
   4   1  -6   53.86    1.73
   4   1  -6   52.94    1.66
   4   1  -6   53.82    1.57
   4  -1  -6   52.98    1.25
   4  -1  -6   52.98    1.25
   4  -1  -6   52.28    1.66
   4  -1  -6   51.17    1.72
  -4   1   5   13.46    0.40
   4   1  -5   13.23    0.68
   4   1  -5   13.37    0.43
  -4   1   5   13.55    0.43
   4   1  -5   13.64    0.41
   4  -1  -5   12.75    0.69
   4  -1  -5   12.97    0.32
   4  -1  -5   12.97    0.32
  -4  -1   5   12.79    0.67
   4  -1  -5   12.71    0.43
   4  -1  -5   13.09    0.44
  -4   1   4   11.74    0.72
   4   1  -4   12.08    0.62
  -4   1   4   12.39    0.39
   4   1  -4   12.06    0.37
  -4   1   4   10.57    0.37
   4   1  -4   12.57    0.39
  -4  -1   4   11.54    0.61
   4  -1  -4   11.72    0.29
   4  -1  -4   11.72    0.29
   4  -1  -4   12.03    0.40
   4  -1  -4   12.24    0.62
   4   1  -3  169.91    8.02
  -4   1   3  156.90    9.32
   4  -1  -3  160.45    8.00
  -4  -1   3  152.78    7.97
  -4   1   2   37.60    1.89
   4   1  -2   40.44    1.90
  -4   1   2   35.63    2.20
   4  -1  -2   38.86    1.89
  -4  -1   2   36.92    1.89
  -4   1   1   16.25    0.86
   4   1  -1   17.56    0.87
  -4   1   1   16.52    1.00
  -4  -1   1   17.12    0.86
   4  -1  -1   17.55    0.86
   4   1   0    0.73    0.06
  -4   1   0    0.63    0.05
   4  -1   0    0.68    0.05
  -4  -1   0    0.60    0.06
  -4   1  -1   33.51    1.55
   4   1   1   29.32    1.54
  -4  -1  -1   29.14    1.54
   4  -1   1   30.42    1.53
  -4   1  -2   18.48    0.95
   4   1   2   18.98    0.98
   4   1   2   18.11    1.12
   4   1   2   19.03    0.47
   4   1   2   19.03    0.47
  -4  -1  -2   19.13    0.98
   4  -1   2   20.61    0.95
   4   1   3  132.62    3.82
   4   1   3  119.02    7.09
   4   1   3  118.65    2.89
   4   1   3  120.14    6.11
  -4   1  -3  118.28    3.99
   4   1   3  118.65    2.89
  -4  -1  -3  122.06    6.09
   4   1   4    1.76    0.07
   4   1   4    1.80    0.06
   4   1   4    1.82    0.14
   4   1   4    1.87    0.08
   4   1   4    1.80    0.06
  -4   1  -4    1.91    0.08
  -4  -1  -4    1.84    0.13
   4   1   5   16.86    0.57
   4   1   5   18.43    0.43
  -4   1  -5   17.27    0.53
   4   1   5   17.95    0.53
   4   1   5   18.43    0.43
  -4   1  -5   15.90    0.58
  -4  -1  -5   17.44    0.91
  -4   1  -6    0.82    0.04
   4   1   6    0.68    0.04
   4   1   6    0.68    0.04
   4   1   6    0.68    0.04
   4   1   6    0.68    0.04
   4   1   7   22.26    0.56
   4   1   7   23.63    0.74
   4   1   7   23.58    0.70
   4   1   7   22.26    0.56
  -4   1  -7   23.07    0.77
  -4   1  -7   22.72    0.70
  -4   1  -8    1.63    0.08
   4   1   8    1.70    0.08
  -4   1  -8    1.56    0.08
   4   1   8    1.58    0.08
  -4   1  -9    4.88    0.18
  -4   1  -9    4.87    0.19
   4   1   9    5.10    0.18
  -4  -1  -9    4.83    0.17
  -4   1 -10    7.83    0.27
  -4   1 -10    7.76    0.29
   4   1  10    7.59    0.27
  -4  -1 -10    7.82    0.26
   4   1  11    2.09    0.10
  -4   1 -11    2.27    0.10
  -4   1 -11    2.24    0.11
  -4  -1 -11    2.21    0.09
  -4  -1 -11    2.20    0.10
  -4   1 -12    0.07    0.02
  -4   1 -12    0.01    0.01
  -4  -1 -12    0.03    0.01
  -4   1 -13    8.84    0.32
  -4   1 -13    9.14    0.34
  -4  -1 -13    8.84    0.31
  -4   1 -14    2.61    0.12
   4   1  14    2.85    0.11
   4   1  14    3.08    0.12
   4   1  14    2.84    0.11
   4  -1  14    2.80    0.11
   4  -1  14    2.87    0.11
   4  -1  14    2.74    0.09
   4  -1  14    2.74    0.09
   4  -1  14    2.82    0.11
   4  -1  14    2.68    0.13
   4   1  15    0.01    0.02
   4   1  15    0.00    0.02
   4   1  15    0.02    0.02
  -4   1 -15    0.02    0.02
   4  -1  15    0.01    0.01
   4  -1  15    0.02    0.02
   4  -1  15    0.03    0.02
   4  -1  15    0.17    0.03
   4  -1  15    0.01    0.02
   4  -1  15    0.01    0.01
  -4   1 -16    8.85    0.32
   4   1  16    8.69    0.27
   4   1  16    9.09    0.28
   4   1  16    9.00    0.27
   4  -1  16    9.00    0.28
   4  -1  16    9.36    0.28
   4  -1  16    9.29    0.22
   4  -1  16    9.29    0.22
   4  -1  16    8.85    0.30
   4  -1  16    9.15    0.27
   4   1  17    0.14    0.02
   4   1  17    0.12    0.02
   4   1  17    0.16    0.02
   4  -1  17    0.13    0.02
   4  -1  17    0.11    0.02
   4  -1  17    0.14    0.02
   4  -1  17    0.10    0.02
   4  -1  17    0.11    0.02
   4  -1  17    0.09    0.02
   4   1  18    6.98    0.20
   4   1  18    6.60    0.21
   4   1  18    6.77    0.21
   4  -1  18    7.36    0.21
   4  -1  18    7.00    0.21
   4  -1  18    7.04    0.16
   4  -1  18    7.04    0.16
   4  -1  18    6.77    0.23
   4  -1  18    6.91    0.21
   4  -1  19    0.44    0.02
   4  -1  19    0.44    0.02
   4  -1  19    0.51    0.03
   4  -1  19    0.49    0.03
   4   2 -19    3.97    0.14
  -4   2  19    4.02    0.13
  -4   2  19    4.18    0.13
  -4   2  19    4.19    0.12
  -4   2  19    4.05    0.13
  -4  -2  19    4.15    0.10
  -4  -2  19    4.15    0.13
  -4  -2  19    4.15    0.10
  -4  -2  19    4.21    0.14
  -4   2  18    0.01    0.01
  -4   2  18    0.01    0.01
  -4   2  18    0.00    0.01
  -4   2  18    0.02    0.02
  -4  -2  18    0.00    0.01
  -4  -2  18    0.02    0.01
  -4  -2  18    0.01    0.01
  -4  -2  18    0.00    0.01
  -4   2  17    7.56    0.24
  -4   2  17    7.74    0.23
  -4   2  17    7.77    0.24
  -4   2  17    7.49    0.24
  -4  -2  17    7.57    0.18
  -4  -2  17    7.66    0.26
  -4  -2  17    7.41    0.23
   4  -2 -17    8.10    0.27
  -4  -2  17    7.57    0.18
  -4   2  16    7.05    0.23
  -4   2  16    7.16    0.22
  -4   2  16    7.35    0.23
  -4   2  16    7.04    0.23
   4  -2 -16    7.20    0.26
  -4  -2  16    7.43    0.22
  -4  -2  16    7.22    0.25
  -4  -2  16    7.03    0.18
  -4  -2  16    7.03    0.18
  -4   2  15    0.68    0.05
  -4   2  15    0.66    0.05
  -4   2  15    0.77    0.06
   4   2 -15    0.58    0.05
  -4   2  15    0.60    0.05
  -4  -2  15    0.70    0.06
  -4  -2  15    0.66    0.04
  -4  -2  15    0.61    0.04
  -4  -2  15    0.61    0.04
   4  -2 -15    0.66    0.05
  -4  -2  15    0.72    0.05
   4   2 -14    0.16    0.03
  -4   2  14    0.16    0.03
  -4   2  14    0.14    0.03
  -4   2  14    0.15    0.03
  -4   2  14    0.15    0.03
  -4  -2  14    0.13    0.03
  -4  -2  14    0.19    0.03
  -4  -2  14    0.10    0.02
  -4  -2  14    0.13    0.02
  -4  -2  14    0.10    0.02
   4  -2 -14    0.16    0.03
  -4   2  13   19.20    0.61
   4   2 -13   18.81    0.64
   4   2 -13   19.21    0.63
   4  -2 -13   18.90    0.65
   4  -2 -13   18.74    0.62
   4  -2 -13   18.81    0.65
   4   2 -12    0.14    0.03
  -4   2  12    0.21    0.04
   4   2 -12    0.25    0.05
  -4   2  12    0.20    0.04
   4  -2 -12    0.25    0.03
   4  -2 -12    0.20    0.04
   4  -2 -12    0.19    0.03
   4  -2 -12    0.19    0.03
   4  -2 -12    0.19    0.03
  -4   2  11    4.89    0.19
  -4   2  11    5.00    0.21
   4   2 -11    4.72    0.19
   4   2 -11    4.93    0.21
   4  -2 -11    4.73    0.15
   4  -2 -11    4.83    0.20
   4  -2 -11    4.99    0.19
   4  -2 -11    5.12    0.18
   4  -2 -11    4.73    0.15
   4   2 -10    1.15    0.07
   4   2 -10    1.32    0.08
  -4   2  10    1.13    0.07
   4   2 -10    1.09    0.08
  -4   2  10    1.06    0.07
   4  -2 -10    1.18    0.06
   4  -2 -10    1.08    0.06
   4  -2 -10    0.94    0.05
   4  -2 -10    1.00    0.07
   4  -2 -10    0.94    0.05
  -4   2   9    1.17    0.07
  -4   2   9    1.18    0.07
   4   2  -9    0.97    0.06
   4   2  -9    1.11    0.08
   4   2  -9    1.05    0.07
   4  -2  -9    1.14    0.06
   4  -2  -9    1.11    0.06
   4  -2  -9    1.03    0.06
   4  -2  -9    1.11    0.06
   4  -2  -9    1.25    0.07
   4   2  -8   25.90    0.88
  -4   2   8   26.24    0.87
   4   2  -8   25.92    0.84
  -4   2   8   27.14    0.82
   4  -2  -8   27.18    0.66
   4  -2  -8   27.18    0.66
   4  -2  -8   28.01    0.88
   4  -2  -8   27.35    0.90
  -4   2   7    6.22    0.21
   4   2  -7    6.16    0.24
  -4   2   7    6.20    0.23
   4   2  -7    6.18    0.23
   4  -2  -7    6.23    0.18
   4  -2  -7    6.35    0.23
   4  -2  -7    6.23    0.18
  -4   2   6    2.63    0.09
  -4   2   6    2.80    0.12
  -4   2   6    2.63    0.09
   4   2  -6    2.78    0.12
   4   2  -6    2.58    0.12
  -4   2   6    2.55    0.11
   4  -2  -6    2.61    0.09
   4  -2  -6    2.61    0.09
   4  -2  -6    2.46    0.11
  -4   2   5    8.29    0.22
  -4   2   5    8.18    0.28
   4   2  -5    7.97    0.28
  -4   2   5    7.93    0.27
  -4   2   5    8.29    0.22
   4   2  -5    7.78    0.29
   4  -2  -5    8.14    0.22
   4  -2  -5    8.14    0.22
   4  -2  -5    8.26    0.29
  -4   2   4   51.54    1.23
   4   2  -4   51.87    1.64
  -4   2   4   51.83    1.63
   4   2  -4   52.48    1.55
  -4   2   4   51.54    1.23
  -4   2   4   52.06    1.54
   4  -2  -4   51.51    1.70
   4  -2  -4   52.12    1.23
   4  -2  -4   52.12    1.23
   4   2  -3   14.01    0.45
  -4   2   3   14.36    0.35
   4   2  -3   14.12    0.35
   4   2  -3   14.31    0.75
   4   2  -3   14.12    0.35
  -4   2   3   14.36    0.35
   4   2  -3   14.36    0.48
  -4   2   3   14.37    0.47
  -4   2   3   13.80    0.44
   4  -2  -3   14.29    0.48
   4  -2  -3   14.37    0.35
   4  -2  -3   14.37    0.35
  -4  -2   3   13.51    0.49
   4   2  -2   72.42    3.63
  -4   2   2   73.02    1.71
  -4   2   2   72.12    2.14
   4   2  -2   73.59    1.72
  -4   2   2   68.44    4.23
  -4   2   2   76.16    2.27
  -4   2   2   73.02    1.71
   4   2  -2   73.59    1.72
   4   2  -2   75.67    2.15
   4   2  -2   73.74    2.29
   4  -2  -2   71.97    1.71
   4  -2  -2   71.97    1.71
   4  -2  -2   70.00    3.62
  -4  -2   2   74.32    3.63
  -4  -2   2   69.15    2.38
   4  -2  -2   75.41    2.38
  -4   2   1    3.67    0.10
   4   2  -1    3.67    0.23
   4   2  -1    3.79    0.14
   4   2  -1    3.74    0.11
  -4   2   1    3.67    0.10
  -4   2   1    3.72    0.13
   4   2  -1    3.74    0.11
   4   2  -1    3.72    0.15
  -4   2   1    3.63    0.13
   4  -2  -1    3.53    0.10
  -4  -2   1    3.40    0.14
   4  -2  -1    3.53    0.10
   4  -2  -1    3.44    0.14
   4  -2  -1    3.56    0.21
  -4  -2   1    3.59    0.23
   4   2   0    2.73    0.09
  -4   2   0    2.75    0.10
   4   2   0    2.56    0.11
   4   2   0    2.92    0.12
   4   2   0    2.73    0.09
  -4  -2   0    2.97    0.12
   4  -2   0    2.78    0.17
   4   2   1   14.24    0.35
  -4   2  -1   13.72    0.43
   4   2   1   13.45    0.43
   4   2   1   14.24    0.35
   4   2   1   13.27    0.46
  -4  -2  -1   14.11    0.47
   4   2   2    0.05    0.02
  -4   2  -2    0.04    0.02
  -4   2  -2    0.04    0.01
   4   2   2    0.07    0.02
   4   2   2    0.07    0.02
   4   2   2    0.07    0.02
  -4  -2  -2    0.06    0.01
   4   2   3   39.85    0.95
  -4   2  -3   39.34    1.30
   4   2   3   39.85    0.95
   4   2   3   38.02    1.25
  -4   2  -3   40.04    1.17
   4   2   3   38.34    1.17
  -4  -2  -3   39.17    1.29
   4   2   4   56.23    1.31
   4   2   4   55.41    1.63
   4   2   4   52.81    1.73
   4   2   4   56.23    1.31
  -4   2  -4   53.57    1.80
  -4   2  -4   54.17    1.63
  -4  -2  -4   55.21    1.79
   4   2   5   19.51    0.63
   4   2   5   19.36    0.48
  -4   2  -5   18.00    0.59
   4   2   5   19.36    0.48
  -4   2  -5   18.29    0.65
   4   2   5   19.30    0.59
  -4  -2  -5   19.23    0.63
  -4   2  -7   14.38    0.47
   4   2   7   14.44    0.38
  -4   2  -7   14.23    0.50
  -4   2  -7   13.55    0.46
   4   2   7   13.78    0.49
   4   2   7   14.44    0.38
   4   2   7   14.21    0.45
  -4  -2  -7   14.48    0.48
  -4   2  -8    5.86    0.25
   4   2   8    6.17    0.19
   4   2   8    6.70    0.22
   4   2   8    6.17    0.19
   4   2   8    6.30    0.24
  -4   2  -8    6.02    0.23
  -4  -2  -8    6.19    0.22
   4   2   9   21.64    0.54
  -4   2  -9   20.80    0.73
  -4   2  -9   21.42    0.68
   4   2   9   21.64    0.54
   4   2   9   19.83    0.70
   4   2   9   21.22    0.65
  -4  -2  -9   20.75    0.53
  -4  -2  -9   20.51    0.69
  -4  -2  -9   20.75    0.53
   4   2  10    0.74    0.06
  -4   2 -10    0.76    0.06
   4   2  10    0.71    0.06
  -4   2 -10    0.80    0.07
  -4  -2 -10    0.93    0.04
  -4   2 -11    0.06    0.03
   4   2  11    0.03    0.02
  -4   2 -11    0.18    0.03
  -4  -2 -11    0.08    0.01
  -4  -2 -11    0.03    0.02
  -4   2 -12    1.30    0.08
  -4   2 -12    1.13    0.09
  -4   2 -13    2.24    0.11
   4  -2  13    2.00    0.07
   4  -2  13    2.13    0.09
   4  -2  13    2.00    0.07
   4  -2  13    2.06    0.10
   4  -2  13    2.04    0.09
   4  -2  13    1.99    0.09
  -4   2 -14    2.36    0.12
   4  -2  14    2.30    0.09
   4  -2  14    2.28    0.10
   4  -2  14    2.22    0.11
   4  -2  14    2.30    0.08
   4  -2  14    2.30    0.08
   4  -2  14    2.27    0.09
  -4   2 -15    0.25    0.04
   4  -2  15    0.27    0.03
   4  -2  15    0.27    0.03
   4  -2  15    0.27    0.04
   4  -2  15    0.27    0.03
   4  -2  15    0.25    0.03
   4  -2  15    0.31    0.04
  -4   2 -16    0.16    0.03
   4  -2  16    0.18    0.03
   4  -2  16    0.14    0.02
   4  -2  16    0.12    0.02
   4  -2  16    0.21    0.03
   4  -2  16    0.14    0.02
   4  -2  16    0.15    0.03
   4  -2  17    1.92    0.08
   4  -2  17    1.92    0.07
   4  -2  17    1.85    0.06
   4  -2  17    1.97    0.08
   4  -2  17    1.92    0.07
   4  -2  17    1.85    0.06
   4  -2  18    0.86    0.04
   4  -2  18    0.85    0.04
   4  -2  18    0.85    0.03
   4  -2  18    0.85    0.04
   4  -2  18    0.85    0.04
   4  -2  18    0.85    0.03
  -4   3  18    0.01    0.01
   4   3 -18    0.01    0.01
  -4   3  18    0.02    0.01
  -4   3  18    0.01    0.01
  -4  -3  18    0.02    0.01
  -4  -3  18    0.01    0.01
  -4   3  17    0.49    0.04
  -4   3  17    0.51    0.04
   4   3 -17    0.57    0.04
  -4   3  17    0.54    0.03
  -4  -3  17    0.53    0.03
  -4  -3  17    0.51    0.04
  -4   3  16    1.69    0.07
  -4   3  16    1.56    0.07
  -4   3  16    1.64    0.07
  -4  -3  16    1.65    0.07
  -4  -3  16    1.60    0.08
  -4   3  15    1.57    0.07
  -4   3  15    1.49    0.08
  -4   3  15    1.59    0.08
  -4  -3  15    1.58    0.08
  -4  -3  15    1.52    0.07
   4  -3 -15    1.53    0.08
  -4   3  14    2.47    0.10
  -4   3  14    2.49    0.11
  -4   3  14    2.50    0.10
   4  -3 -14    2.51    0.12
  -4  -3  14    2.44    0.11
  -4  -3  14    2.54    0.09
  -4   3  13    0.23    0.03
  -4   3  13    0.24    0.04
  -4   3  13    0.25    0.04
  -4  -3  13    0.17    0.03
   4  -3 -13    0.20    0.03
  -4  -3  13    0.21    0.03
  -4   3  12    0.46    0.05
  -4   3  12    0.56    0.05
  -4   3  12    0.46    0.05
  -4  -3  12    0.36    0.03
  -4  -3  12    0.44    0.05
   4  -3 -12    0.51    0.05
  -4   3  11    0.39    0.05
   4   3 -11    0.49    0.07
  -4   3  11    0.38    0.05
   4  -3 -11    0.55    0.05
   4  -3 -11    0.47    0.05
   4  -3 -11    0.49    0.06
   4  -3 -11    0.53    0.05
   4  -3 -11    0.55    0.05
  -4   3  10    2.32    0.11
   4   3 -10    2.14    0.13
  -4   3  10    2.15    0.12
   4  -3 -10    2.24    0.09
   4  -3 -10    2.24    0.09
   4  -3 -10    2.21    0.12
   4  -3 -10    2.13    0.11
   4  -3 -10    2.24    0.11
  -4   3   9    6.30    0.26
  -4   3   9    6.55    0.24
   4   3  -9    6.39    0.26
   4  -3  -9    6.41    0.20
   4  -3  -9    6.40    0.26
   4  -3  -9    6.78    0.25
   4  -3  -9    6.41    0.20
   4  -3  -9    6.57    0.24
  -4   3   8   16.54    0.57
  -4   3   8   16.92    0.54
   4   3  -8   16.99    0.56
   4  -3  -8   16.21    0.58
   4  -3  -8   16.14    0.55
   4  -3  -8   16.76    0.44
   4  -3  -8   16.76    0.44
   4   3  -7   18.73    0.66
   4   3  -7   19.08    0.63
  -4   3   7   18.75    0.65
  -4   3   7   19.24    0.61
   4  -3  -7   19.32    0.67
   4  -3  -7   20.12    0.63
   4  -3  -7   19.43    0.49
   4  -3  -7   19.43    0.49
  -4   3   6    1.27    0.08
   4   3  -6    1.22    0.08
  -4   3   6    1.37    0.07
   4   3  -6    1.09    0.08
   4  -3  -6    1.14    0.06
   4  -3  -6    1.14    0.06
   4  -3  -6    1.28    0.07
   4  -3  -6    1.14    0.07
   4   3  -5    0.37    0.05
  -4   3   5    0.34    0.04
  -4   3   5    0.31    0.03
  -4   3   5    0.37    0.04
  -4   3   5    0.31    0.03
   4  -3  -5    0.38    0.04
   4  -3  -5    0.33    0.04
   4  -3  -5    0.38    0.04
   4  -3  -5    0.32    0.04
  -4   3   4    3.27    0.11
  -4   3   4    3.27    0.11
  -4   3   4    3.35    0.13
   4   3  -4    3.15    0.14
  -4   3   4    3.13    0.14
   4   3  -4    3.27    0.15
   4  -3  -4    3.12    0.11
   4  -3  -4    3.26    0.14
   4  -3  -4    3.12    0.11
   4  -3  -4    3.10    0.13
  -4   3   3   21.94    0.70
  -4   3   3   20.47    0.66
  -4   3   3   21.91    0.53
  -4   3   3   21.91    0.53
   4   3  -3   20.69    0.68
   4   3  -3   21.65    0.72
   4  -3  -3   21.50    0.53
   4  -3  -3   20.75    0.73
   4  -3  -3   21.50    0.53
  -4   3   2   30.37    0.92
   4   3  -2   29.65    0.74
  -4   3   2   30.88    0.73
   4   3  -2   29.65    0.74
   4   3  -2   29.77    0.93
  -4   3   2   30.88    0.73
   4   3  -2   31.01    0.99
   4  -3  -2   29.24    0.73
   4  -3  -2   29.24    0.73
   4   3  -1   15.03    0.40
   4   3  -1   15.03    0.50
   4   3  -1   15.85    0.53
   4   3  -1   15.03    0.40
  -4   3   1   15.21    0.49
  -4  -3   1   15.88    0.55
   4   3   0    2.78    0.10
   4   3   0    2.78    0.10
   4   3   0    2.70    0.12
  -4   3   0    2.38    0.11
   4   3   0    2.51    0.13
  -4  -3   0    2.60    0.13
   4   3   1    2.25    0.11
  -4   3  -1    2.08    0.10
   4   3   1    2.14    0.08
   4   3   1    2.12    0.10
   4   3   1    2.14    0.08
  -4  -3  -1    1.99    0.11
  -4   3  -2    5.68    0.20
   4   3   2    5.46    0.17
   4   3   2    5.37    0.20
   4   3   2    5.49    0.22
   4   3   2    5.46    0.17
  -4  -3  -2    5.44    0.22
  -4   3  -3    8.32    0.29
   4   3   3    8.43    0.29
   4   3   3    8.50    0.32
   4   3   3    8.37    0.24
   4   3   3    8.37    0.24
  -4  -3  -3    8.46    0.28
  -4  -3  -3    8.39    0.31
   4   3   4    2.40    0.11
   4   3   4    2.26    0.10
   4   3   4    2.26    0.10
  -4   3  -4    2.51    0.11
   4   3   4    2.41    0.12
  -4  -3  -4    2.43    0.10
  -4  -3  -4    2.30    0.11
   4   3   5    0.05    0.02
   4   3   5    0.04    0.02
   4   3   5    0.04    0.02
  -4   3  -5    0.04    0.02
   4   3   5    0.04    0.02
  -4  -3  -5    0.04    0.02
   4   3   6    3.49    0.14
   4   3   6    3.05    0.16
   4   3   6    3.55    0.13
   4   3   6    3.55    0.13
  -4  -3  -6    3.54    0.15
   4   3   7    0.65    0.05
  -4   3  -7    0.51    0.05
   4   3   7    0.64    0.05
   4   3   7    0.75    0.06
   4   3   7    0.65    0.05
  -4  -3  -7    0.58    0.05
   4   3   8   23.20    0.71
   4   3   8   23.12    0.59
   4   3   8   23.12    0.59
   4   3   8   21.84    0.76
  -4   3  -8   22.17    0.74
  -4  -3  -8   22.42    0.76
  -4  -3  -8   22.24    0.58
  -4  -3  -8   22.24    0.58
   4   3   9    7.34    0.30
   4   3   9    7.68    0.24
   4   3   9    7.95    0.28
   4   3   9    7.68    0.24
  -4   3  -9    8.38    0.29
  -4  -3  -9    7.79    0.29
  -4  -3  -9    7.82    0.24
  -4  -3  -9    7.82    0.24
  -4   3 -10    7.01    0.27
   4   3  10    6.91    0.22
   4   3  10    6.91    0.22
   4   3  10    7.06    0.26
   4   3  10    7.02    0.28
  -4  -3 -10    7.02    0.22
  -4  -3 -10    7.02    0.22
  -4  -3 -10    7.09    0.26
   4   3  11    0.50    0.04
  -4   3 -11    0.36    0.05
   4  -3  11    0.46    0.04
   4  -3  11    0.42    0.05
   4  -3  11    0.42    0.04
   4   3  12    0.13    0.02
  -4   3 -12    0.17    0.03
   4  -3  12    0.14    0.03
   4  -3  12    0.18    0.03
  -4   3 -13    0.26    0.04
   4   3  13    0.45    0.04
   4  -3  13    0.34    0.04
   4  -3  13    0.30    0.03
   4  -3  13    0.32    0.03
   4  -3  13    0.33    0.04
   4   3  14    1.74    0.07
   4  -3  14    1.93    0.08
   4  -3  14    1.81    0.08
   4  -3  14    1.78    0.09
   4  -3  14    1.79    0.07
   4   3  15    2.72    0.09
   4  -3  15    2.63    0.10
   4  -3  15    2.62    0.11
   4  -3  15    2.83    0.09
   4  -3  15    2.65    0.10
   4  -3  16    0.02    0.01
   4  -3  16    0.05    0.01
   4  -3  16    0.03    0.01
   4  -3  16    0.03    0.01
   4  -3  17    0.82    0.03
   4  -3  17    0.76    0.04
   4  -3  17    0.75    0.04
  -4   4  16    0.03    0.01
  -4   4  16    0.02    0.01
  -4   4  15    7.27    0.21
  -4   4  15    7.20    0.22
  -4   4  15    7.32    0.22
  -4  -4  15    7.33    0.21
  -4   4  14    0.79    0.05
  -4   4  14    0.74    0.05
  -4   4  14    0.78    0.04
  -4  -4  14    0.76    0.04
  -4   4  13    3.12    0.11
  -4   4  13    3.08    0.11
   4  -4 -13    3.04    0.13
  -4  -4  13    3.14    0.10
  -4   4  12    0.17    0.03
  -4   4  12    0.14    0.03
  -4   4  12    0.13    0.03
  -4  -4  12    0.14    0.02
   4  -4 -12    0.15    0.03
  -4   4  11    2.51    0.11
  -4   4  11    2.50    0.10
  -4   4  11    2.59    0.11
  -4  -4  11    2.58    0.09
   4  -4 -11    2.53    0.12
  -4   4  10    9.07    0.29
  -4   4  10    9.28    0.29
  -4   4  10    9.07    0.27
   4  -4 -10    9.16    0.33
  -4   4   9    1.69    0.08
  -4   4   9    1.72    0.08
  -4   4   9    1.75    0.09
   4  -4  -9    1.84    0.10
   4   4  -8    1.07    0.09
  -4   4   8    1.02    0.06
  -4   4   8    0.92    0.08
  -4   4   8    1.08    0.07
  -4   4   8    1.00    0.06
  -4   4   8    0.90    0.06
   4  -4  -8    0.92    0.07
   4  -4  -8    0.94    0.08
   4  -4  -8    1.00    0.06
  -4  -4   8    0.96    0.05
   4  -4  -8    1.00    0.06
   4  -4  -8    1.06    0.07
   4   4  -7    3.60    0.18
  -4   4   7    3.75    0.16
   4  -4  -7    3.45    0.17
   4  -4  -7    3.58    0.16
   4  -4  -7    3.67    0.13
   4  -4  -7    3.67    0.13
  -4   4   6   13.58    0.45
   4   4  -6   13.34    0.47
   4  -4  -6   13.32    0.36
   4  -4  -6   13.32    0.36
   4  -4  -6   13.39    0.46
  -4   4   5   14.70    0.48
   4   4  -5   13.75    0.50
   4  -4  -5   14.36    0.49
   4  -4  -5   14.81    0.39
   4  -4  -5   14.81    0.39
   4   4  -4    7.71    0.30
  -4   4   4    7.69    0.28
   4  -4  -4    7.71    0.28
   4   4  -3    2.02    0.12
   4   4  -3    2.04    0.12
  -4   4   3    2.14    0.11
   4   4  -2    2.55    0.13
   4   4  -2    2.39    0.14
  -4   4   2    2.79    0.13
   4   4  -1    1.13    0.09
  -4   4   1    1.18    0.08
   4   4  -1    1.26    0.09
  -4  -4   1    1.20    0.07
   4   4   0    2.50    0.13
  -4   4   0    2.68    0.13
   4   4   0    2.69    0.14
  -4  -4   0    2.53    0.11
   4   4   1    4.20    0.18
   4   4   1    3.81    0.14
  -4   4  -1    4.10    0.17
   4   4   1    4.06    0.19
   4   4   1    3.81    0.14
  -4  -4  -1    4.15    0.16
  -4  -4  -1    4.19    0.19
   4   4   2    0.83    0.06
  -4   4  -2    0.90    0.07
   4   4   2    0.76    0.06
   4   4   2    0.83    0.06
   4   4   2    0.87    0.08
  -4  -4  -2    0.82    0.06
  -4  -4  -2    0.90    0.07
   4   4   3    4.35    0.16
   4   4   3    4.46    0.21
  -4   4  -3    4.26    0.19
   4   4   3    4.55    0.19
   4   4   3    4.35    0.16
  -4  -4  -3    4.82    0.21
  -4  -4  -3    4.52    0.18
   4   4   4    0.63    0.07
   4   4   4    0.82    0.07
   4   4   4    0.73    0.05
   4   4   4    0.73    0.05
  -4  -4  -4    0.68    0.05
  -4  -4  -4    0.90    0.07
   4   4   5   11.79    0.34
   4   4   5   11.45    0.40
   4   4   5   11.47    0.44
   4   4   5   11.79    0.34
  -4  -4  -5   11.58    0.39
   4   4   6   11.38    0.45
   4   4   6   12.37    0.35
   4   4   6   12.37    0.35
   4   4   6   12.00    0.41
  -4  -4  -6   12.11    0.34
  -4  -4  -6   11.85    0.44
  -4  -4  -6   12.00    0.41
  -4  -4  -6   12.11    0.34
   4   4   7    0.65    0.05
  -4  -4  -7    0.69    0.05
  -4  -4  -7    0.73    0.06
   4  -4   7    0.74    0.04
   4  -4   7    0.61    0.04
   4   4   8    2.69    0.10
   4  -4   8    2.71    0.10
  -4  -4  -8    2.64    0.12
   4  -4   8    2.55    0.10
   4   4   9    3.04    0.11
  -4  -4  -9    3.13    0.13
   4  -4   9    3.15    0.11
   4  -4   9    2.99    0.11
   4   4  10    0.33    0.04
   4  -4  10    0.31    0.03
   4  -4  10    0.30    0.03
  -4  -4 -10    0.33    0.04
   4   4  11    1.64    0.07
   4  -4  11    1.50    0.06
  -4  -4 -11    1.49    0.08
   4  -4  11    1.42    0.07
   4   4  12    0.35    0.03
   4  -4  12    0.22    0.03
  -4  -4 -12    0.26    0.03
   4  -4  12    0.23    0.02
   4   4  13    0.56    0.03
   4  -4  13    0.50    0.03
   4  -4  13    0.49    0.03
   4   4  14    0.28    0.02
   4  -4  14    0.29    0.02
   4  -4  14    0.29    0.02
   4  -4  15    0.48    0.03
  -4   5  13    1.00    0.04
  -4   5  13    0.96    0.04
  -4   5  12    0.21    0.02
  -4   5  12    0.23    0.02
  -4   5  11    0.10    0.02
  -4   5  11    0.13    0.02
  -4   5  10    3.36    0.12
  -4   5  10    3.30    0.11
  -4   5   9    0.36    0.04
  -4   5   9    0.40    0.03
   4  -5  -9    0.49    0.05
  -4   5   8    1.68    0.08
  -4   5   8    1.58    0.07
   4  -5  -8    1.44    0.09
  -4   5   7    0.04    0.02
  -4   5   6    0.84    0.06
   4   5  -6    0.92    0.05
  -4  -5   6    0.81    0.04
  -4   5   5    2.64    0.11
   4   5  -5    2.55    0.09
  -4  -5   5    2.58    0.09
   4  -5  -5    2.49    0.10
   4   5  -4    0.34    0.03
  -4   5   4    0.26    0.03
   4  -5  -4    0.29    0.03
  -4  -5   4    0.27    0.03
   4   5  -3    0.02    0.02
  -4   5   3    0.07    0.02
   4  -5  -3    0.08    0.02
   4   5  -2    4.72    0.15
  -4   5   2    4.98    0.16
   4  -5  -2    4.69    0.16
  -4   5   1    0.01    0.02
   4   5  -1    0.04    0.02
   4  -5  -1    0.01    0.02
   4   5   0    0.97    0.05
  -4   5   0    0.96    0.06
   4  -5   0    0.89    0.05
   4   5   1   25.67    0.69
   4  -5   1   25.89    0.71
   4   5   2   -0.01    0.01
   4  -5   2    0.03    0.02
  -4  -5  -2    0.01    0.02
   4   5   3    5.37    0.17
   4  -5   3    5.36    0.17
  -4  -5  -3    5.41    0.21
   4   5   4    0.62    0.04
  -4  -5  -4    0.58    0.05
   4  -5   4    0.62    0.04
   4   5   5    0.10    0.02
  -4  -5  -5    0.10    0.02
   4  -5   5    0.09    0.02
   4   5   6    0.85    0.05
   4  -5   6    0.82    0.05
  -4  -5  -6    0.89    0.06
   4   5   7    2.78    0.10
  -4  -5  -7    2.67    0.12
   4  -5   7    2.85    0.10
   4   5   8    0.11    0.02
  -4  -5  -8    0.12    0.03
   4  -5   8    0.13    0.02
   4   5   9    1.31    0.06
   4  -5   9    1.42    0.06
   4   5  10    0.81    0.04
   4  -5  10    0.82    0.04
   4   5  11    0.03    0.01
   4  -5  11    0.00    0.01
   4   5  12    1.59    0.05
   4  -5  12    1.66    0.06
  -4   6   8    0.37    0.02
   4  -6  -8    0.42    0.02
  -4   6   7    5.70    0.17
   4  -6  -7    5.76    0.17
   4  -6  -6    4.26    0.13
   4  -6  -5    0.45    0.03
   4  -6  -4    0.01    0.01
   4   6  -3    1.12    0.05
   4  -6  -3    1.17    0.05
  -4  -6   3    1.10    0.05
   4   6  -2    0.52    0.03
  -4  -6   2    0.58    0.03
   4  -6  -2    0.52    0.03
   4   6  -1    6.26    0.18
   4  -6  -1    6.24    0.19
  -4  -6   1    6.22    0.18
   4   6   0    4.46    0.13
   4  -6   0    4.34    0.14
  -4  -6   0    4.39    0.13
   4   6   1    0.20    0.02
   4  -6   1    0.20    0.02
   4   6   2    5.98    0.17
   4  -6   2    6.00    0.18
   4   6   3    0.33    0.03
   4  -6   3    0.32    0.03
   4   6   4    0.61    0.03
   4  -6   4    0.62    0.03
   4   6   5    9.77    0.27
   4  -6   5    9.69    0.27
   4   6   6    0.11    0.02
   4  -6   6    0.10    0.01
   4   6   7    1.52    0.05
   4  -6   7    1.50    0.05
  -5   0  20    4.18    0.13
  -5   0  20    4.40    0.11
  -5   0  20    4.18    0.13
  -5   0  20    4.35    0.14
  -5   0  20    4.22    0.13
  -5   0  20    4.40    0.11
  -5   0  19    0.00    0.01
  -5   0  19    0.01    0.01
  -5   0  19    0.02    0.02
  -5   0  19    0.02    0.02
  -5   0  19    0.04    0.01
  -5   0  19    0.04    0.01
  -5   0  18    6.28    0.16
  -5   0  18    6.22    0.20
  -5   0  18    5.94    0.19
  -5   0  18    6.07    0.20
  -5   0  18    6.28    0.16
  -5   0  18    6.16    0.20
   5   0 -18    6.17    0.23
  -5   0  17    0.00    0.01
   5   0 -17    0.08    0.02
  -5   0  17    0.01    0.02
  -5   0  17    0.00    0.01
  -5   0  17    0.02    0.02
  -5   0  17    0.01    0.01
  -5   0  17    0.02    0.02
  -5   0  16    6.96    0.22
  -5   0  16    7.16    0.18
  -5   0  16    7.16    0.18
  -5   0  16    6.87    0.22
  -5   0  16    7.28    0.23
   5   0 -16    7.26    0.26
  -5   0  16    7.07    0.23
   5   0 -15    0.02    0.03
  -5   0  15    0.02    0.02
  -5   0  15    0.01    0.02
  -5   0  15    0.01    0.02
  -5   0  15    0.06    0.02
   5   0 -15    0.00    0.02
   5   0 -15    0.01    0.02
   5   0 -15    0.07    0.03
  -5   0  15    0.01    0.02
  -5   0  15    0.01    0.02
  -5   0  15    0.00    0.02
   5   0 -14    3.64    0.16
   5   0 -14    3.59    0.15
   5   0 -14    3.38    0.16
   5   0 -14    3.32    0.16
   5   0 -13    0.01    0.01
   5   0 -13    0.00    0.02
   5   0 -13    0.00    0.02
   5   0 -13    0.00    0.02
   5   0 -12    2.43    0.11
   5   0 -12    2.38    0.11
  -5   0  12    2.41    0.11
   5   0 -12    2.27    0.11
   5   0 -12    2.35    0.12
  -5   0  11    0.00    0.01
   5   0 -11    0.00    0.01
   5   0 -11    0.01    0.01
   5   0 -11    0.00    0.01
   5   0 -11    0.01    0.01
   5   0 -10    7.78    0.29
   5   0 -10    7.96    0.27
  -5   0  10    7.90    0.27
   5   0 -10    7.75    0.28
  -5   0   9   -0.01    0.01
   5   0  -9    0.00    0.01
   5   0  -9    0.00    0.01
   5   0  -9    0.01    0.01
   5   0  -9    0.00    0.01
   5   0  -9    0.00    0.01
   5   0  -8    3.10    0.12
   5   0  -8    3.02    0.12
   5   0  -8    3.00    0.09
   5   0  -8    3.08    0.12
  -5   0   8    3.00    0.12
   5   0  -8    3.00    0.09
   5   0  -7   -0.02    0.01
  -5   0   7   -0.02    0.01
   5   0  -7   -0.02    0.01
   5   0  -7   -0.03    0.01
   5   0  -7   -0.02    0.01
   5   0  -7   -0.03    0.01
   5   0  -7   -0.02    0.01
  -5   0   6    3.25    0.12
   5   0  -6    3.37    0.10
   5   0  -6    3.88    0.13
   5   0  -6    3.61    0.13
   5   0  -6    3.37    0.10
   5   0  -6    3.53    0.12
   5   0  -6    3.39    0.20
   5   0  -5   -0.04    0.01
   5   0  -5   -0.04    0.01
  -5   0   5   -0.05    0.01
   5   0  -5   -0.04    0.01
   5   0  -5   -0.04    0.01
   5   0  -5   -0.04    0.01
   5   0  -4   51.73    2.59
  -5   0   3   -0.11    0.01
   5   0  -3   -0.11    0.01
   5   0  -2  124.71    6.23
  -5   0   1    0.00    0.01
   5   0  -1    0.04    0.01
   5   0   0   29.26    1.47
  -5   0   0   29.56    1.47
   5   0   1    0.00    0.01
  -5   0  -1   -0.02    0.01
   5   0   2    5.55    0.30
  -5   0  -2    5.42    0.29
  -5   0  -2    5.82    0.34
  -5   0  -3    0.05    0.02
   5   0   3    0.02    0.01
  -5   0  -3    0.01    0.01
  -5   0  -4  121.58    7.29
  -5   0  -4  120.10    6.25
  -5   0  -4  138.92    6.28
  -5   0  -4  120.75    4.06
  -5   0  -6   13.74    0.45
  -5   0  -6   13.90    0.42
  -5   0  -7    0.07    0.01
  -5   0  -8   17.72    0.59
  -5   0  -9    0.11    0.02
  -5   0 -10   48.77    1.60
  -5   0 -11    0.01    0.01
  -5   0 -12    5.05    0.19
  -5   0 -13    0.04    0.02
   5   0  14    0.96    0.06
   5   0  14    1.05    0.05
   5   0  14    1.05    0.05
   5   0  14    1.04    0.06
   5   0  14    0.98    0.07
   5   0  14    1.02    0.06
   5   0  15   -0.01    0.02
   5   0  15    0.00    0.01
   5   0  15    0.00    0.01
   5   0  15   -0.01    0.02
   5   0  15    0.00    0.02
   5   0  15    0.01    0.02
  -5   0 -16    2.80    0.12
   5   0  16    2.85    0.11
   5   0  16    3.04    0.09
   5   0  16    3.02    0.11
   5   0  16    2.78    0.11
   5   0  16    3.04    0.09
   5   0  17    0.00    0.02
   5   0  17    0.01    0.02
   5   0  17    0.03    0.01
   5   0  17   -0.01    0.01
   5   0  17    0.03    0.01
   5   0  18    0.53    0.03
   5   0  18    0.56    0.03
   5   0  18    0.57    0.04
   5   0  18    0.54    0.03
   5   0  18    0.56    0.03
  -5   1  20    7.46    0.21
  -5   1  20    7.58    0.21
  -5   1  20    7.10    0.21
  -5   1  20    7.28    0.20
   5   1 -20    7.25    0.23
  -5  -1  20    7.32    0.17
  -5  -1  20    7.08    0.21
  -5  -1  20    7.09    0.23
  -5  -1  20    6.93    0.21
  -5  -1  20    7.32    0.17
  -5   1  19    6.82    0.21
  -5   1  19    6.97    0.20
  -5   1  19    7.22    0.22
  -5   1  19    6.92    0.21
  -5   1  19    7.09    0.17
  -5   1  19    7.09    0.17
   5   1 -19    7.18    0.23
  -5  -1  19    6.98    0.20
  -5  -1  19    7.35    0.21
  -5  -1  19    6.98    0.21
  -5  -1  19    7.17    0.21
  -5  -1  19    7.16    0.23
  -5  -1  19    7.24    0.17
  -5  -1  19    7.24    0.17
  -5   1  18    0.09    0.02
  -5   1  18    0.12    0.02
  -5   1  18    0.10    0.02
  -5   1  18    0.13    0.03
  -5  -1  18    0.05    0.01
  -5  -1  18    0.07    0.02
  -5  -1  18    0.09    0.02
  -5  -1  18    0.10    0.02
  -5  -1  18    0.05    0.01
  -5  -1  18    0.10    0.02
  -5  -1  18    0.11    0.02
   5  -1 -18    0.05    0.02
  -5   1  17    0.48    0.03
   5   1 -17    0.42    0.05
  -5   1  17    0.44    0.04
  -5   1  17    0.48    0.03
  -5   1  17    0.48    0.05
  -5   1  17    0.43    0.04
  -5   1  17    0.48    0.04
  -5  -1  17    0.44    0.03
  -5  -1  17    0.44    0.03
  -5  -1  17    0.45    0.04
  -5  -1  17    0.49    0.04
  -5  -1  17    0.45    0.05
  -5  -1  17    0.42    0.04
  -5  -1  17    0.48    0.04
   5  -1 -17    0.52    0.05
  -5   1  16    0.03    0.02
  -5   1  16    0.03    0.02
   5   1 -16    0.05    0.02
  -5   1  16    0.01    0.02
  -5   1  16    0.03    0.02
  -5   1  16    0.03    0.02
  -5   1  16    0.01    0.02
  -5  -1  16    0.02    0.02
  -5  -1  16    0.03    0.02
  -5  -1  16    0.03    0.02
  -5  -1  16    0.03    0.02
   5  -1 -16    0.04    0.02
  -5  -1  16    0.03    0.02
  -5  -1  16    0.07    0.02
  -5  -1  16    0.01    0.02
  -5   1  15    0.09    0.02
  -5   1  15    0.09    0.02
  -5   1  15    0.03    0.02
  -5   1  15    0.03    0.02
  -5   1  15    0.02    0.02
   5   1 -15    0.04    0.02
  -5   1  15    0.05    0.02
   5  -1 -15    0.01    0.02
  -5  -1  15    0.01    0.02
  -5  -1  15    0.06    0.02
  -5  -1  15    0.04    0.02
  -5  -1  15    0.06    0.02
  -5  -1  15    0.05    0.02
  -5  -1  15    0.02    0.02
  -5  -1  15    0.02    0.02
   5   1 -14    9.31    0.34
  -5   1  14    8.78    0.32
   5   1 -14    9.07    0.32
   5   1 -14    9.42    0.36
   5  -1 -14    8.46    0.32
   5  -1 -14    9.19    0.34
   5  -1 -14    9.24    0.34
   5  -1 -14    9.28    0.32
   5   1 -13   12.92    0.43
  -5   1  13   12.57    0.42
   5   1 -13   12.46    0.45
   5   1 -13   12.56    0.43
   5   1 -13   12.56    0.46
   5  -1 -13   12.28    0.44
   5  -1 -13   11.97    0.42
   5  -1 -13   12.15    0.44
   5  -1 -13   12.49    0.42
   5   1 -12    8.90    0.34
   5   1 -12    9.05    0.34
   5   1 -12    8.96    0.33
   5   1 -12    9.10    0.32
  -5   1  12    9.16    0.32
   5  -1 -12    9.16    0.31
   5  -1 -12    9.25    0.33
   5  -1 -12    9.26    0.33
   5  -1 -12    8.91    0.31
  -5   1  11    1.64    0.08
   5   1 -11    1.41    0.09
   5   1 -11    1.44    0.08
   5   1 -11    1.56    0.09
   5   1 -11    1.35    0.08
   5  -1 -11    1.17    0.07
   5  -1 -11    1.40    0.06
   5  -1 -11    1.35    0.07
   5  -1 -11    1.40    0.06
   5  -1 -11    1.35    0.08
   5  -1 -11    1.62    0.08
   5   1 -10   67.56    2.01
  -5   1  10   66.98    2.00
   5   1 -10   65.60    2.22
   5   1 -10   68.69    2.13
   5   1 -10   69.08    2.08
   5  -1 -10   67.71    1.60
   5  -1 -10   68.03    2.21
   5  -1 -10   66.16    2.13
   5  -1 -10   67.71    1.60
   5  -1 -10   66.76    2.08
  -5   1   9    2.51    0.11
   5   1  -9    2.54    0.12
   5   1  -9    2.51    0.11
  -5   1   9    2.86    0.11
   5   1  -9    2.55    0.12
   5  -1  -9    2.49    0.09
   5  -1  -9    2.52    0.11
   5  -1  -9    2.39    0.11
   5  -1  -9    2.49    0.09
  -5   1   8    0.04    0.02
  -5   1   8    0.04    0.02
   5   1  -8    0.05    0.02
   5   1  -8    0.03    0.02
   5   1  -8    0.07    0.02
   5  -1  -8    0.04    0.02
   5  -1  -8    0.05    0.01
   5  -1  -8    0.05    0.01
  -5   1   7    0.27    0.03
   5   1  -7    0.25    0.03
   5   1  -7    0.35    0.03
   5   1  -7    0.26    0.03
   5  -1  -7    0.30    0.02
   5  -1  -7    0.27    0.02
   5  -1  -7    0.30    0.02
  -5   1   6    0.31    0.03
   5   1  -6    0.34    0.04
   5   1  -6    0.35    0.03
   5   1  -6    0.31    0.03
   5   1  -6    0.37    0.02
   5   1  -6    0.36    0.03
  -5   1   6    0.34    0.03
   5   1  -6    0.37    0.02
   5  -1  -6    0.32    0.02
   5  -1  -6    0.36    0.03
   5  -1  -6    0.32    0.02
   5  -1  -6    0.40    0.03
   5   1  -5   45.75    1.43
   5   1  -5   43.01    2.27
   5   1  -5   44.78    1.07
   5   1  -5   47.42    1.35
  -5   1   5   45.94    1.34
  -5   1   5   45.46    1.42
   5   1  -5   44.78    1.07
   5  -1  -5   46.36    1.48
   5  -1  -5   44.62    2.27
   5  -1  -5   46.20    1.42
   5  -1  -5   44.75    1.07
   5  -1  -5   44.75    1.07
  -5   1   4   60.28    1.93
   5   1  -4   61.85    1.45
   5   1  -4   62.00    3.10
   5   1  -4   62.22    1.82
   5   1  -4   64.24    1.94
   5   1  -4   61.85    1.45
   5  -1  -4   61.37    3.08
   5  -1  -4   61.53    1.45
   5  -1  -4   61.53    1.45
   5  -1  -4   59.56    1.93
   5  -1  -4   63.40    2.02
  -5   1   3    0.94    0.08
   5   1  -3    1.00    0.05
   5   1  -3    0.98    0.08
   5  -1  -3    1.00    0.08
   5  -1  -3    0.93    0.04
   5  -1  -3    0.93    0.04
  -5   1   2  232.77   12.11
   5   1  -2  234.06    6.56
  -5  -1   2  191.22   10.38
   5  -1  -2  177.48   10.37
   5   1  -1    1.41    0.10
  -5   1   1    1.09    0.09
  -5   1   1    1.32    0.09
   5  -1  -1    1.28    0.08
  -5   1   0   44.49    2.20
   5   1   0   43.47    2.19
   5   1   0   42.57    1.04
   5   1   0   42.57    1.04
   5  -1   0   45.49    2.20
   5   1   1  180.82    4.23
   5   1   1  180.82    4.23
   5   1   1  174.51    8.98
   5  -1   1  180.47    8.90
  -5  -1  -1  180.15    5.83
   5   1   2    0.78    0.05
   5   1   2    0.92    0.04
  -5   1  -2    0.84    0.06
   5   1   2    0.92    0.04
   5   1   2    0.83    0.08
   5   1   2    0.92    0.08
  -5   1  -2    0.76    0.04
  -5  -1  -2    0.87    0.04
   5  -1   2    0.95    0.06
  -5  -1  -2    0.91    0.08
   5   1   3  102.01    5.15
   5   1   3  103.36    2.43
  -5   1  -3  105.39    3.41
   5   1   3  104.45    3.26
   5   1   3  103.36    2.43
  -5   1  -4  135.47    4.36
   5   1   4  129.24    3.12
   5   1   4  128.55    4.15
   5   1   4  152.09    7.70
   5   1   4  135.06    3.91
   5   1   4  129.24    3.12
   5   1   4  125.82    6.57
  -5  -1  -4  123.97    6.56
   5   1   5    0.49    0.03
  -5   1  -5    0.51    0.03
   5   1   5    0.49    0.03
   5   1   5    0.48    0.04
   5   1   5    0.49    0.03
   5   1   6   27.33    0.94
   5   1   6   31.06    0.71
   5   1   6   29.29    0.88
  -5   1  -6   28.00    0.97
   5   1   6   31.06    0.71
   5   1   7    9.52    0.32
   5   1   7    9.29    0.30
  -5   1  -7    8.97    0.33
  -5   1  -8   24.02    0.78
   5   1   8   22.54    0.71
  -5   1  -9   36.07    1.17
  -5   1  -9   34.26    1.09
  -5   1 -10    2.07    0.10
  -5   1 -10    2.36    0.11
  -5  -1 -10    2.23    0.08
  -5   1 -11    0.87    0.06
  -5   1 -11    0.86    0.06
  -5  -1 -11    0.92    0.04
  -5   1 -12    0.22    0.03
  -5   1 -12    0.20    0.04
  -5  -1 -12    0.17    0.02
  -5   1 -13    3.13    0.13
  -5   1 -13    2.90    0.14
   5  -1  13    3.19    0.13
   5  -1  13    3.05    0.10
   5  -1  13    2.65    0.11
   5  -1  13    3.05    0.10
   5  -1  13    2.94    0.11
   5  -1  13    3.01    0.12
  -5   1 -14    0.76    0.06
   5   1  14    0.77    0.05
   5  -1  14    0.81    0.04
   5  -1  14    0.81    0.05
   5  -1  14    0.67    0.06
   5  -1  14    0.68    0.05
   5  -1  14    0.70    0.05
   5  -1  14    0.81    0.04
   5   1  15    0.03    0.02
  -5   1 -15    0.06    0.02
   5  -1  15    0.10    0.03
   5  -1  15    0.08    0.02
   5  -1  15    0.03    0.02
   5  -1  15    0.03    0.02
   5  -1  15    0.03    0.02
   5  -1  15    0.08    0.02
  -5   1 -16    1.11    0.07
   5   1  16    1.00    0.06
   5  -1  16    1.00    0.05
   5  -1  16    1.08    0.05
   5  -1  16    1.08    0.05
   5  -1  16    1.07    0.06
   5  -1  16    1.08    0.07
   5  -1  16    0.94    0.06
   5   1  17    6.74    0.21
   5  -1  17    6.70    0.23
   5  -1  17    6.88    0.17
   5  -1  17    6.88    0.17
   5  -1  17    6.92    0.21
   5  -1  17    6.99    0.21
   5  -1  17    6.94    0.21
   5  -1  18    3.48    0.13
   5  -1  18    3.58    0.11
   5  -1  18    3.56    0.09
   5  -1  18    3.56    0.09
   5  -1  18    3.55    0.12
   5  -1  18    3.44    0.12
   5   2 -19    0.42    0.03
  -5   2  19    0.31    0.03
  -5   2  19    0.30    0.02
  -5   2  19    0.33    0.03
  -5   2  19    0.36    0.03
  -5  -2  19    0.37    0.02
  -5  -2  19    0.33    0.03
  -5  -2  19    0.37    0.02
  -5  -2  19    0.39    0.03
  -5   2  18    0.27    0.03
   5   2 -18    0.26    0.03
  -5   2  18    0.29    0.03
  -5   2  18    0.28    0.03
  -5   2  18    0.30    0.03
  -5  -2  18    0.34    0.02
  -5  -2  18    0.30    0.03
  -5  -2  18    0.26    0.03
  -5  -2  18    0.34    0.02
  -5   2  17    2.06    0.09
  -5   2  17    2.09    0.08
  -5   2  17    2.16    0.09
  -5   2  17    2.08    0.09
   5  -2 -17    2.05    0.10
  -5  -2  17    1.98    0.08
  -5  -2  17    2.03    0.09
  -5  -2  17    2.03    0.07
  -5  -2  17    2.03    0.07
  -5  -2  17    1.99    0.08
  -5   2  16    0.08    0.02
  -5   2  16    0.09    0.02
  -5   2  16    0.08    0.02
  -5   2  16    0.08    0.02
  -5  -2  16    0.03    0.02
  -5  -2  16    0.07    0.02
  -5  -2  16    0.06    0.02
   5  -2 -16    0.05    0.02
  -5  -2  16    0.07    0.03
  -5  -2  16    0.07    0.02
  -5   2  15    9.47    0.28
  -5   2  15    9.80    0.30
  -5   2  15    9.86    0.30
  -5   2  15    9.33    0.29
   5  -2 -15    9.64    0.34
  -5  -2  15    9.63    0.23
  -5  -2  15    9.35    0.28
  -5  -2  15    9.48    0.27
  -5  -2  15    9.69    0.32
  -5  -2  15    9.63    0.23
  -5   2  14    6.95    0.23
  -5   2  14    7.40    0.24
  -5   2  14    7.08    0.23
  -5   2  14    7.16    0.24
  -5  -2  14    7.36    0.26
   5  -2 -14    7.78    0.27
  -5  -2  14    7.40    0.22
  -5  -2  14    7.12    0.22
  -5  -2  14    7.23    0.18
  -5  -2  14    7.23    0.18
   5   2 -13    7.09    0.27
  -5   2  13    6.37    0.25
   5   2 -13    6.48    0.24
   5  -2 -13    6.17    0.20
   5  -2 -13    6.13    0.24
   5  -2 -13    6.17    0.20
   5  -2 -13    6.83    0.26
   5  -2 -13    6.61    0.24
   5  -2 -13    6.72    0.25
   5   2 -12    1.33    0.08
  -5   2  12    1.34    0.08
   5  -2 -12    1.36    0.08
   5  -2 -12    1.37    0.07
   5  -2 -12    1.29    0.07
   5  -2 -12    1.38    0.09
   5  -2 -12    1.37    0.07
   5   2 -11    6.72    0.27
   5   2 -11    6.69    0.26
  -5   2  11    6.72    0.26
  -5   2  11    6.72    0.24
   5   2 -11    6.37    0.24
   5  -2 -11    6.71    0.20
   5  -2 -11    6.48    0.25
   5  -2 -11    6.83    0.26
   5  -2 -11    6.71    0.20
   5  -2 -11    6.65    0.24
   5   2 -10   24.15    0.75
  -5   2  10   24.12    0.73
   5   2 -10   23.03    0.79
  -5   2  10   22.78    0.78
   5  -2 -10   23.65    0.59
   5  -2 -10   22.44    0.74
   5  -2 -10   22.90    0.77
   5  -2 -10   23.74    0.79
   5  -2 -10   23.65    0.59
  -5   2   9    9.55    0.34
  -5   2   9    9.26    0.31
   5   2  -9    9.19    0.35
   5   2  -9   10.23    0.34
   5  -2  -9    9.27    0.26
   5  -2  -9    9.22    0.34
   5  -2  -9    9.27    0.26
   5  -2  -9    9.49    0.32
   5  -2  -9    8.98    0.33
  -5   2   8   12.07    0.39
  -5   2   8   12.16    0.42
   5   2  -8   12.30    0.41
   5   2  -8   12.01    0.43
   5  -2  -8   12.38    0.32
   5  -2  -8   11.82    0.42
   5  -2  -8   11.45    0.40
   5  -2  -8   12.38    0.32
   5  -2  -8   12.89    0.43
  -5   2   7    5.15    0.19
   5   2  -7    5.26    0.21
  -5   2   7    5.15    0.20
   5   2  -7    5.28    0.20
   5  -2  -7    5.37    0.20
   5  -2  -7    5.36    0.20
   5  -2  -7    5.47    0.16
   5  -2  -7    5.47    0.16
   5   2  -6    9.72    0.35
  -5   2   6   10.08    0.32
   5   2  -6    9.93    0.33
  -5   2   6    9.95    0.34
   5  -2  -6   10.18    0.35
   5  -2  -6    9.82    0.26
   5  -2  -6    9.82    0.26
  -5   2   5   41.96    1.33
   5   2  -5   41.46    1.35
   5   2  -5   42.37    1.27
  -5   2   5   41.57    1.26
   5  -2  -5   42.66    1.01
   5  -2  -5   42.66    1.01
   5  -2  -5   42.36    1.39
  -5   2   4   28.47    0.90
   5   2  -4   28.97    0.96
   5   2  -4   30.06    0.72
   5   2  -4   30.06    0.72
   5   2  -4   30.25    0.91
  -5   2   4   29.41    0.95
   5  -2  -4   29.99    0.72
   5  -2  -4   31.17    0.99
   5  -2  -4   29.99    0.72
   5   2  -3    1.07    0.06
   5   2  -3    1.11    0.05
   5   2  -3    1.18    0.06
  -5   2   3    1.07    0.06
   5   2  -3    1.11    0.05
  -5   2   3    1.02    0.05
   5  -2  -3    1.09    0.04
  -5  -2   3    1.08    0.06
   5  -2  -3    1.14    0.06
   5  -2  -3    1.09    0.04
  -5   2   2    7.22    0.23
   5   2  -2    7.41    0.26
   5   2  -2    7.13    0.19
  -5   2   2    7.37    0.25
  -5   2   2    6.93    0.46
   5   2  -2    7.16    0.24
   5   2  -2    7.13    0.19
   5  -2  -2    7.01    0.19
  -5  -2   2    7.31    0.26
   5  -2  -2    7.01    0.19
   5  -2  -2    6.93    0.26
   5   2  -1    1.83    0.07
   5   2  -1    1.83    0.07
  -5   2   1    1.75    0.15
  -5   2   1    1.88    0.08
   5   2  -1    1.92    0.09
   5   2  -1    1.79    0.08
   5  -2  -1    2.31    0.06
   5  -2  -1    2.10    0.13
   5  -2  -1    2.31    0.06
  -5  -2   1    1.86    0.09
   5   2   0   16.04    0.51
  -5   2   0   15.62    0.50
   5   2   0   16.62    0.54
   5   2   0   16.37    0.41
   5   2   0   16.37    0.41
  -5  -2   0   16.96    0.56
   5   2   1    0.04    0.01
   5   2   1    0.07    0.02
   5   2   1    0.04    0.01
   5   2   1    0.04    0.02
  -5   2  -1    0.12    0.02
  -5  -2  -1    0.05    0.01
   5   2   2  124.81    2.90
   5   2   2  124.81    2.90
   5   2   2  125.55    3.64
  -5   2  -2  117.47    3.63
  -5   2  -2  120.20    4.01
   5   2   2  126.56    3.85
  -5  -2  -2  124.21    4.05
   5   2   3    0.30    0.03
  -5   2  -3    0.26    0.03
   5   2   3    0.32    0.03
  -5   2  -3    0.27    0.04
   5   2   3    0.32    0.03
   5   2   3    0.25    0.04
  -5  -2  -3    0.26    0.02
   5   2   4    3.25    0.11
   5   2   4    3.25    0.11
   5   2   4    3.15    0.12
  -5   2  -4    3.15    0.14
   5   2   4    3.19    0.14
  -5  -2  -4    3.14    0.12
   5   2   5    2.68    0.10
   5   2   5    2.77    0.11
   5   2   5    2.68    0.10
  -5   2  -5    2.66    0.12
   5   2   5    2.56    0.12
  -5  -2  -5    2.59    0.10
   5   2   6    8.26    0.31
   5   2   6    8.31    0.24
   5   2   6    8.31    0.24
  -5   2  -6    8.80    0.31
   5   2   6    8.33    0.28
  -5  -2  -6    8.23    0.29
  -5   2  -7   19.88    0.64
   5   2   7   19.57    0.66
  -5   2  -7   20.23    0.69
   5   2   7   19.63    0.51
   5   2   7   18.83    0.61
   5   2   7   19.63    0.51
  -5  -2  -7   20.69    0.66
   5   2   8   18.00    0.60
  -5   2  -8   18.33    0.63
   5   2   8   17.38    0.46
   5   2   8   17.38    0.46
   5   2   8   17.62    0.56
  -5   2  -8   17.63    0.58
  -5  -2  -8   17.82    0.59
   5   2   9    0.00    0.02
  -5   2  -9    0.03    0.02
   5   2   9    0.04    0.02
   5   2   9    0.04    0.02
  -5   2  -9    0.02    0.02
   5   2   9    0.04    0.02
  -5  -2  -9    0.09    0.02
  -5  -2  -9    0.10    0.02
  -5  -2  -9    0.09    0.02
  -5   2 -10    0.81    0.07
   5   2  10    0.72    0.06
  -5   2 -10    0.81    0.06
  -5  -2 -10    0.81    0.04
  -5   2 -11    6.81    0.25
  -5   2 -11    6.27    0.27
  -5   2 -12   19.76    0.68
  -5   2 -12   19.81    0.63
   5  -2  12   18.48    0.54
   5  -2  12   18.65    0.54
   5  -2  12   18.33    0.53
   5  -2  12   18.89    0.43
   5  -2  12   19.21    0.60
   5  -2  12   18.89    0.43
  -5   2 -13   12.47    0.41
   5  -2  13   11.58    0.28
   5  -2  13   11.83    0.34
   5  -2  13   11.30    0.35
   5  -2  13   11.58    0.35
   5  -2  13   11.58    0.28
   5  -2  13   11.54    0.39
  -5   2 -14    0.27    0.04
   5  -2  14    0.23    0.03
   5  -2  14    0.25    0.03
   5  -2  14    0.20    0.03
   5  -2  14    0.25    0.03
   5  -2  14    0.23    0.04
   5  -2  14    0.20    0.03
  -5   2 -15    3.71    0.16
   5  -2  15    3.70    0.13
   5  -2  15    3.78    0.13
   5  -2  15    3.82    0.11
   5  -2  15    3.82    0.11
   5  -2  15    3.74    0.15
   5  -2  15    3.71    0.13
   5  -2  16    1.25    0.07
   5  -2  16    1.28    0.05
   5  -2  16    1.28    0.05
   5  -2  16    1.30    0.06
   5  -2  16    1.33    0.06
   5  -2  17    0.41    0.02
   5  -2  17    0.44    0.03
   5  -2  17    0.38    0.03
   5  -2  17    0.43    0.03
   5  -2  17    0.41    0.02
   5  -2  17    0.33    0.03
   5  -2  18    8.27    0.24
   5  -2  18    8.13    0.26
   5  -2  18    8.36    0.19
   5  -2  18    8.36    0.19
   5  -2  18    8.23    0.24
  -5   3  18    0.03    0.01
  -5   3  18    0.02    0.01
  -5   3  18    0.03    0.01
   5   3 -18    0.03    0.01
  -5  -3  18    0.02    0.01
  -5   3  17    0.09    0.02
   5   3 -17    0.07    0.02
  -5   3  17    0.07    0.02
  -5   3  17    0.08    0.02
  -5  -3  17    0.07    0.02
  -5  -3  17    0.06    0.01
  -5   3  16    3.88    0.14
   5   3 -16    4.06    0.14
  -5   3  16    3.86    0.13
  -5   3  16    4.03    0.14
  -5  -3  16    4.18    0.13
  -5  -3  16    3.89    0.15
  -5   3  15    0.27    0.03
  -5   3  15    0.28    0.04
  -5   3  15    0.32    0.04
   5  -3 -15    0.27    0.04
  -5  -3  15    0.22    0.03
  -5  -3  15    0.23    0.03
  -5   3  14    0.51    0.05
  -5   3  14    0.52    0.04
  -5   3  14    0.58    0.05
  -5  -3  14    0.52    0.05
  -5  -3  14    0.53    0.04
   5  -3 -14    0.54    0.05
  -5  -3  14    0.59    0.04
  -5   3  13    2.47    0.11
  -5   3  13    2.33    0.10
  -5   3  13    2.52    0.11
  -5  -3  13    2.38    0.09
   5  -3 -13    2.37    0.12
  -5  -3  13    2.43    0.11
  -5  -3  13    2.58    0.09
  -5   3  12   35.15    0.96
  -5   3  12   36.93    1.01
  -5   3  12   35.90    1.00
   5  -3 -12   37.14    1.15
  -5  -3  12   35.78    1.08
  -5  -3  12   36.00    0.94
  -5   3  11   44.56    1.45
   5   3 -11   46.23    1.40
  -5   3  11   44.56    1.36
   5  -3 -11   46.00    1.45
   5  -3 -11   44.20    1.10
   5  -3 -11   43.71    1.41
   5  -3 -11   45.16    1.49
   5  -3 -11   44.20    1.10
   5   3 -10    0.12    0.04
  -5   3  10    0.12    0.03
  -5   3  10    0.11    0.03
   5  -3 -10    0.11    0.03
   5  -3 -10    0.06    0.02
   5  -3 -10    0.13    0.03
   5  -3 -10    0.11    0.03
   5  -3 -10    0.07    0.02
   5   3  -9    3.91    0.19
  -5   3   9    3.83    0.18
  -5   3   9    4.02    0.16
   5  -3  -9    3.94    0.16
   5  -3  -9    3.95    0.17
   5  -3  -9    4.09    0.14
   5  -3  -9    4.09    0.14
   5  -3  -9    4.20    0.18
  -5   3   8    1.07    0.07
   5   3  -8    1.09    0.09
   5   3  -8    1.18    0.09
  -5   3   8    1.07    0.07
   5  -3  -8    1.06    0.06
   5  -3  -8    1.06    0.06
   5  -3  -8    1.21    0.07
   5  -3  -8    1.11    0.07
   5  -3  -8    1.09    0.07
   5   3  -7    2.04    0.12
  -5   3   7    2.07    0.10
  -5   3   7    2.08    0.11
   5   3  -7    2.25    0.12
   5  -3  -7    2.01    0.08
   5  -3  -7    1.99    0.10
   5  -3  -7    2.15    0.10
   5  -3  -7    2.01    0.08
  -5   3   6    6.14    0.22
   5   3  -6    6.06    0.24
   5   3  -6    5.70    0.25
  -5   3   6    5.96    0.23
   5  -3  -6    5.96    0.18
   5  -3  -6    6.12    0.24
   5  -3  -6    6.45    0.22
   5  -3  -6    5.96    0.18
   5   3  -5    5.23    0.21
   5   3  -5    5.35    0.22
  -5   3   5    5.49    0.20
  -5   3   5    5.12    0.21
   5  -3  -5    5.39    0.16
   5  -3  -5    5.11    0.21
   5  -3  -5    5.79    0.20
   5  -3  -5    5.39    0.16
  -5   3   4   14.01    0.44
  -5   3   4   13.01    0.46
   5   3  -4   13.79    0.45
   5   3  -4   13.49    0.48
   5  -3  -4   13.91    0.45
   5  -3  -4   13.55    0.48
   5  -3  -4   13.48    0.35
   5  -3  -4   13.48    0.35
   5   3  -3    0.74    0.06
  -5   3   3    0.72    0.05
   5   3  -3    0.76    0.06
   5  -3  -3    0.67    0.04
   5  -3  -3    0.67    0.04
   5   3  -2    4.43    0.19
   5   3  -2    4.48    0.14
   5   3  -2    4.21    0.17
  -5   3   2    4.31    0.17
   5   3  -2    4.48    0.14
  -5  -3   2    4.37    0.19
   5   3  -1   11.55    0.40
  -5   3   1   11.28    0.37
   5   3  -1   11.19    0.30
   5   3  -1   11.13    0.38
   5   3  -1   11.19    0.30
  -5  -3   1   10.84    0.41
   5   3   0   47.49    1.44
   5   3   0   48.17    1.54
   5   3   0   48.04    1.16
  -5   3   0   47.56    1.44
   5   3   0   48.04    1.16
  -5  -3   0   47.98    1.60
  -5   3  -1   34.24    1.12
   5   3   1   36.92    0.91
   5   3   1   36.28    1.20
   5   3   1   36.92    0.91
   5   3   1   39.43    1.13
  -5  -3  -1   37.12    1.24
  -5  -3  -1   38.60    1.16
  -5   3  -2    5.27    0.20
   5   3   2    5.17    0.17
   5   3   2    5.67    0.20
   5   3   2    5.54    0.22
   5   3   2    5.17    0.17
  -5  -3  -2    5.31    0.22
  -5  -3  -2    5.44    0.19
   5   3   3    9.87    0.33
   5   3   3   10.07    0.28
   5   3   3    9.84    0.37
   5   3   3   10.07    0.28
  -5  -3  -3   10.16    0.37
  -5  -3  -3    9.64    0.33
   5   3   4   16.43    0.43
   5   3   4   16.43    0.43
   5   3   4   16.27    0.52
   5   3   4   16.22    0.56
  -5  -3  -4   15.01    0.56
  -5  -3  -4   16.24    0.52
   5   3   5    0.04    0.02
   5   3   5    0.04    0.02
   5   3   5    0.04    0.02
   5   3   5    0.04    0.02
  -5  -3  -5    0.05    0.02
   5   3   6    2.72    0.11
   5   3   6    2.67    0.14
   5   3   6    2.72    0.11
   5   3   6    2.71    0.12
  -5  -3  -6    2.68    0.12
   5   3   7    3.68    0.17
   5   3   7    3.67    0.14
   5   3   7    3.67    0.14
  -5   3  -7    3.47    0.15
   5   3   7    3.37    0.15
  -5  -3  -7    3.61    0.15
   5   3   8    0.16    0.03
   5   3   8    0.16    0.03
  -5   3  -8    0.14    0.03
   5   3   8    0.19    0.03
   5   3   8    0.11    0.03
   5   3   9    9.98    0.30
   5   3   9   10.16    0.38
  -5   3  -9   10.49    0.37
   5   3   9    9.98    0.30
  -5  -3  -9   10.30    0.30
  -5  -3  -9   10.30    0.30
  -5  -3  -9   10.07    0.36
   5   3  10   19.87    0.54
   5   3  10   19.69    0.68
  -5   3 -10   19.46    0.65
  -5  -3 -10   20.13    0.66
   5  -3  10   19.52    0.55
  -5  -3 -10   19.62    0.52
   5  -3  10   19.47    0.56
  -5  -3 -10   19.62    0.52
   5   3  11   10.91    0.31
  -5   3 -11   11.26    0.39
   5  -3  11   10.76    0.32
   5  -3  11   10.78    0.33
   5  -3  11   10.88    0.32
   5  -3  11   10.62    0.36
   5   3  12    2.43    0.09
  -5   3 -12    2.38    0.12
   5  -3  12    2.52    0.10
   5  -3  12    2.60    0.09
   5  -3  12    2.52    0.11
   5  -3  12    2.28    0.10
   5   3  13    0.22    0.03
  -5   3 -13    0.18    0.03
   5  -3  13    0.25    0.04
   5  -3  13    0.19    0.03
   5  -3  13    0.14    0.02
   5  -3  13    0.18    0.03
   5  -3  14    5.39    0.19
   5  -3  14    5.53    0.17
   5  -3  14    5.36    0.17
   5  -3  14    5.30    0.17
   5  -3  14    5.38    0.14
   5  -3  14    5.38    0.14
   5  -3  15    0.71    0.03
   5  -3  15    0.69    0.04
   5  -3  15    0.71    0.03
   5  -3  15    0.72    0.05
   5  -3  15    0.73    0.04
   5  -3  15    0.72    0.04
   5  -3  16    1.11    0.05
   5  -3  16    1.11    0.05
   5  -3  16    1.08    0.05
   5  -3  16    1.17    0.05
  -5   4  16    0.49    0.03
  -5   4  16    0.52    0.03
  -5   4  16    0.55    0.03
   5  -4 -16    0.53    0.03
  -5   4  15    2.57    0.09
  -5   4  15    2.54    0.09
  -5   4  15    2.67    0.09
  -5   4  14    0.77    0.05
  -5   4  14    0.77    0.05
  -5   4  14    0.68    0.04
  -5   4  13    0.05    0.02
  -5   4  13    0.06    0.02
  -5   4  13    0.08    0.02
   5  -4 -13    0.06    0.02
  -5   4  12    3.04    0.11
  -5   4  12    2.98    0.12
  -5   4  12    2.98    0.12
   5  -4 -12    3.05    0.14
  -5   4  11    0.31    0.04
  -5   4  11    0.35    0.04
  -5   4  11    0.48    0.05
  -5  -4  11    0.38    0.03
   5  -4 -11    0.34    0.05
  -5   4  10    0.03    0.02
  -5   4  10    0.10    0.03
  -5   4  10    0.01    0.02
  -5  -4  10    0.03    0.02
   5  -4 -10    0.02    0.02
  -5   4   9    6.36    0.21
  -5   4   9    6.58    0.22
  -5   4   9    6.41    0.22
  -5  -4   9    6.48    0.19
   5  -4  -9    6.81    0.25
  -5   4   8    9.83    0.30
  -5   4   8   10.34    0.37
   5   4  -8   10.57    0.39
   5   4  -8   10.16    0.29
  -5   4   8   10.29    0.32
  -5   4   8    9.83    0.31
  -5  -4   8   10.29    0.29
   5  -4  -8   10.53    0.36
  -5   4   7   30.62    0.94
   5   4  -7   30.64    0.97
   5  -4  -7   30.70    0.97
   5  -4  -7   29.55    0.76
   5  -4  -7   29.55    0.76
  -5   4   6    6.36    0.24
   5   4  -6    6.20    0.26
   5  -4  -6    6.63    0.20
   5  -4  -6    6.63    0.20
   5  -4  -6    6.19    0.24
   5   4  -5    3.77    0.18
  -5   4   5    3.77    0.16
   5  -4  -5    3.80    0.13
   5  -4  -5    3.56    0.16
   5  -4  -5    3.80    0.13
   5   4  -4    4.55    0.21
   5   4  -4    4.54    0.20
  -5   4   4    4.64    0.19
   5   4  -3    7.07    0.28
   5   4  -3    7.31    0.30
  -5   4   3    7.47    0.27
  -5   4   2    4.75    0.19
   5   4  -2    5.09    0.21
   5   4  -2    4.79    0.22
   5   4  -1    2.04    0.11
  -5   4   1    1.98    0.11
   5   4  -1    1.98    0.12
  -5  -4   1    2.08    0.10
   5   4   0    0.01    0.02
   5   4   0    0.02    0.02
   5   4   0    0.02    0.02
   5   4   1    2.92    0.14
   5   4   1    3.09    0.12
   5   4   1    3.03    0.16
   5   4   1    3.09    0.12
  -5  -4  -1    3.25    0.13
  -5  -4  -1    3.20    0.16
   5   4   2    0.38    0.05
   5   4   2    0.44    0.05
   5   4   2    0.44    0.05
   5   4   2    0.38    0.06
  -5  -4  -2    0.44    0.06
  -5  -4  -2    0.32    0.04
   5   4   3    0.19    0.04
   5   4   3    0.21    0.04
   5   4   3    0.19    0.04
   5   4   3    0.21    0.04
  -5  -4  -3    0.21    0.03
  -5  -4  -3    0.27    0.05
   5   4   4   14.78    0.49
   5   4   4   14.37    0.41
   5   4   4   14.99    0.53
   5   4   4   14.37    0.41
  -5  -4  -4   14.30    0.53
  -5  -4  -4   14.91    0.49
   5   4   5    9.11    0.36
   5   4   5    9.04    0.28
   5   4   5    9.04    0.28
  -5  -4  -5    9.33    0.32
  -5  -4  -5    9.10    0.35
   5   4   6    0.35    0.06
   5   4   6    0.37    0.05
   5   4   6    0.32    0.05
   5   4   6    0.48    0.05
   5   4   6    0.32    0.05
   5  -4   6    0.39    0.04
  -5  -4  -6    0.32    0.04
   5  -4   6    0.29    0.04
   5   4   7    0.02    0.02
  -5  -4  -7    0.00    0.01
   5  -4   7    0.02    0.02
   5  -4   7    0.03    0.02
   5   4   8    0.99    0.06
  -5  -4  -8    1.01    0.06
   5  -4   8    0.97    0.05
   5  -4   8    0.98    0.05
   5   4   9    0.94    0.06
   5  -4   9    1.01    0.05
   5  -4   9    1.06    0.05
  -5  -4  -9    1.00    0.06
   5   4  10    4.87    0.15
   5  -4  10    4.68    0.16
   5  -4  10    4.74    0.15
  -5  -4 -10    4.66    0.18
   5   4  11    0.97    0.05
  -5  -4 -11    1.00    0.06
   5  -4  11    0.98    0.05
   5  -4  11    1.03    0.05
   5   4  12    0.53    0.04
   5  -4  12    0.52    0.03
   5  -4  12    0.56    0.04
   5   4  13    0.01    0.01
   5  -4  13    0.01    0.01
   5  -4  13    0.02    0.01
   5   4  14    0.46    0.03
   5  -4  14    0.45    0.03
   5  -4  14    0.41    0.03
  -5   5  13    0.02    0.01
  -5   5  13    0.02    0.01
  -5   5  12    0.57    0.03
  -5   5  12    0.59    0.04
  -5   5  11    1.33    0.06
  -5   5  11    1.35    0.06
  -5   5  10    0.34    0.03
  -5   5   9    0.12    0.02
  -5   5   8    8.43    0.26
  -5  -5   8    8.55    0.24
  -5   5   7    1.02    0.06
  -5  -5   7    1.02    0.05
   5   5  -6    0.42    0.03
  -5   5   6    0.53    0.05
  -5  -5   6    0.43    0.03
  -5   5   5   13.66    0.40
   5   5  -5   13.89    0.38
  -5  -5   5   13.61    0.38
   5  -5  -5   14.08    0.40
  -5   5   4   20.18    0.58
   5   5  -4   20.72    0.56
  -5  -5   4   21.04    0.55
   5  -5  -4   20.92    0.58
   5   5  -3   23.45    0.64
  -5   5   3   23.73    0.67
   5  -5  -3   24.36    0.67
   5   5  -2    1.11    0.06
  -5   5   2    1.14    0.06
   5  -5  -2    1.25    0.06
   5   5  -1    0.03    0.02
  -5   5   1    0.10    0.02
   5  -5  -1    0.05    0.02
  -5   5   0    1.50    0.07
   5   5   0    1.52    0.07
   5  -5   0    1.44    0.07
   5   5   1   33.75    0.89
   5  -5   1   34.71    0.92
  -5  -5  -1   32.46    1.06
   5   5   2    0.80    0.05
   5  -5   2    0.87    0.05
   5   5   3    1.63    0.07
  -5  -5  -3    1.57    0.08
   5  -5   3    1.68    0.07
   5   5   4    0.15    0.02
  -5  -5  -4    0.20    0.03
   5  -5   4    0.11    0.02
   5   5   5    3.08    0.11
   5  -5   5    3.28    0.11
  -5  -5  -5    3.17    0.13
   5   5   6    0.17    0.02
  -5  -5  -6    0.18    0.03
   5  -5   6    0.20    0.03
   5   5   7    3.41    0.12
  -5  -5  -7    3.31    0.14
   5  -5   7    3.41    0.11
   5   5   8    0.20    0.02
   5  -5   8    0.21    0.02
  -5  -5  -8    0.27    0.03
   5   5   9    0.65    0.04
   5  -5   9    0.58    0.03
   5   5  10    1.18    0.05
   5  -5  10    1.19    0.05
   5   5  11    0.69    0.03
   5  -5  11    0.70    0.03
   5  -5  12    0.22    0.02
  -5   6   8    0.79    0.04
   5  -6  -8    0.77    0.03
  -5   6   7    2.89    0.09
   5  -6  -7    2.93    0.09
   5  -6  -6    0.05    0.01
  -5  -6   5    0.30    0.02
   5  -6  -5    0.42    0.03
  -5  -6   4    4.82    0.14
   5  -6  -4    5.01    0.15
   5   6  -3    0.61    0.03
   5  -6  -3    0.68    0.04
  -5  -6   3    0.64    0.03
   5   6  -2    1.31    0.05
   5  -6  -2    1.35    0.06
  -5  -6   2    1.32    0.05
   5   6  -1    0.57    0.03
   5  -6  -1    0.56    0.03
  -5  -6   1    0.55    0.03
   5   6   0    2.54    0.09
   5  -6   0    2.55    0.09
  -5  -6   0    2.58    0.08
   5   6   1    8.56    0.24
   5  -6   1    9.00    0.25
   5   6   2    3.30    0.10
   5  -6   2    3.29    0.11
   5   6   3    0.13    0.02
   5  -6   3    0.12    0.02
   5   6   4    3.18    0.10
   5  -6   4    3.15    0.10
   5   6   5    3.62    0.11
   5  -6   5    3.59    0.11
   5   6   6    1.99    0.07
   5  -6   6    1.94    0.06
  -6   0  20    0.08    0.02
  -6   0  20    0.06    0.01
  -6   0  20    0.10    0.01
  -6   0  20    0.10    0.01
  -6   0  20    0.09    0.02
  -6   0  20    0.10    0.01
  -6   0  19    0.05    0.02
  -6   0  19    0.03    0.02
  -6   0  19    0.01    0.01
  -6   0  19    0.01    0.01
  -6   0  19    0.00    0.01
  -6   0  19    0.00    0.01
  -6   0  18    0.16    0.02
  -6   0  18    0.15    0.03
  -6   0  18    0.09    0.02
  -6   0  18    0.15    0.03
  -6   0  18    0.09    0.02
   6   0 -18    0.10    0.02
  -6   0  18    0.21    0.03
  -6   0  17    0.02    0.01
  -6   0  17    0.05    0.02
  -6   0  17    0.01    0.02
  -6   0  17    0.02    0.01
  -6   0  17    0.02    0.02
   6   0 -17    0.03    0.02
  -6   0  17    0.01    0.02
  -6   0  16   10.25    0.25
  -6   0  16   10.03    0.31
  -6   0  16    9.87    0.30
  -6   0  16   10.09    0.31
   6   0 -16   10.96    0.36
  -6   0  16   10.25    0.25
  -6   0  16   10.40    0.31
   6   0 -15    0.03    0.03
  -6   0  15    0.04    0.02
  -6   0  15   -0.01    0.01
  -6   0  15   -0.01    0.01
  -6   0  15    0.02    0.02
  -6   0  15    0.01    0.02
  -6   0  15   -0.01    0.02
   6   0 -15    0.00    0.02
  -6   0  15    0.00    0.02
   6   0 -14    6.47    0.25
   6   0 -14    6.96    0.26
   6   0 -14    7.02    0.27
   6   0 -14    6.51    0.27
   6   0 -13    0.04    0.02
   6   0 -13    0.00    0.01
   6   0 -13    0.01    0.02
   6   0 -13    0.00    0.01
   6   0 -12    2.31    0.12
   6   0 -12    2.18    0.10
   6   0 -12    2.22    0.11
   6   0 -12    2.37    0.11
   6   0 -11    0.01    0.01
   6   0 -11    0.01    0.01
  -6   0  11    0.01    0.02
   6   0 -11    0.03    0.02
   6   0 -11    0.01    0.01
   6   0 -10   48.32    1.57
  -6   0  10   47.86    1.48
   6   0 -10   50.63    1.48
   6   0 -10   50.62    1.63
   6   0 -10   50.20    1.54
   6   0  -9   -0.01    0.01
   6   0  -9   -0.01    0.01
   6   0  -9   -0.01    0.01
  -6   0   9    0.01    0.01
   6   0  -9    0.00    0.01
   6   0  -9    0.00    0.01
   6   0  -8    2.31    0.08
   6   0  -8    2.51    0.10
   6   0  -8    2.31    0.10
   6   0  -8    2.50    0.10
   6   0  -8    2.31    0.08
  -6   0   8    2.36    0.10
   6   0  -7    0.01    0.01
   6   0  -7    0.00    0.01
   6   0  -7    0.00    0.01
  -6   0   7    0.01    0.01
   6   0  -7    0.01    0.01
   6   0  -7    0.01    0.01
   6   0  -6  104.90    3.28
   6   0  -6  106.21    2.49
   6   0  -6  106.84    3.08
   6   0  -6  106.21    2.49
  -6   0   6  100.46    3.08
   6   0  -6  101.99    3.39
   6   0  -5    0.02    0.01
   6   0  -5    0.01    0.01
   6   0  -5   -0.01    0.01
   6   0  -5    0.01    0.01
   6   0  -5    0.00    0.01
  -6   0   5    0.02    0.01
   6   0  -4    0.39    0.03
   6   0  -4    0.38    0.02
   6   0  -4    0.38    0.02
   6   0  -4    0.37    0.04
   6   0  -3   -0.02    0.00
   6   0  -3   -0.02    0.01
   6   0  -3   -0.02    0.00
   6   0  -2    3.08    0.18
  -6   0   2    2.97    0.18
   6   0  -1    0.00    0.01
  -6   0   1    0.01    0.01
  -6   0   0  358.02   20.13
   6   0   0  411.19   20.48
   6   0   1    0.00    0.01
  -6   0  -1    0.01    0.01
  -6   0  -2   61.26    2.92
  -6   0  -2   57.30    1.91
   6   0   2   56.34    2.90
  -6   0  -3   -0.02    0.01
   6   0   3   -0.02    0.01
  -6   0  -3   -0.04    0.01
  -6   0  -3   -0.02    0.01
  -6   0  -4   71.06    3.32
   6   0   4   62.81    3.29
  -6   0  -4   64.97    2.17
  -6   0  -5    0.01    0.01
  -6   0  -6    2.09    0.08
  -6   0  -7   -0.01    0.01
  -6   0  -8   47.01    1.53
  -6   0  -9    0.01    0.01
  -6   0 -10    3.57    0.14
  -6   0 -11    0.01    0.01
  -6   0 -12   25.93    0.87
   6   0  13    0.00    0.01
   6   0  13    0.00    0.01
  -6   0 -13    0.00    0.01
   6   0  13    0.00    0.02
   6   0  13    0.03    0.02
   6   0  13    0.06    0.02
   6   0  14    0.18    0.03
   6   0  14    0.23    0.03
   6   0  14    0.23    0.03
   6   0  14    0.32    0.04
   6   0  14    0.28    0.04
   6   0  15   -0.03    0.02
   6   0  15    0.02    0.02
   6   0  15   -0.01    0.02
   6   0  15    0.00    0.01
   6   0  15    0.00    0.01
   6   0  16    0.04    0.02
   6   0  16    0.05    0.02
  -6   0 -16    0.07    0.02
   6   0  16    0.05    0.02
   6   0  16    0.07    0.02
   6   0  17    0.01    0.01
   6   0  17    0.00    0.02
   6   0  17    0.01    0.01
   6   0  17    0.01    0.01
   6   0  18    0.52    0.03
   6   0  18    0.53    0.02
   6   0  18    0.47    0.03
   6   0  18    0.53    0.02
   6   1 -20    1.32    0.05
  -6   1  20    1.26    0.05
  -6   1  20    1.26    0.05
  -6   1  20    1.26    0.05
  -6   1  20    1.19    0.05
  -6  -1  20    1.27    0.04
  -6  -1  20    1.26    0.05
  -6  -1  20    1.20    0.05
  -6  -1  20    1.27    0.04
  -6  -1  20    1.26    0.05
  -6   1  19    0.21    0.02
  -6   1  19    0.22    0.03
  -6   1  19    0.15    0.02
  -6   1  19    0.15    0.02
  -6   1  19    0.21    0.02
  -6   1  19    0.15    0.02
   6   1 -19    0.13    0.02
  -6  -1  19    0.18    0.02
  -6  -1  19    0.17    0.02
  -6  -1  19    0.16    0.02
  -6  -1  19    0.17    0.02
  -6  -1  19    0.18    0.02
  -6  -1  19    0.20    0.02
  -6  -1  19    0.15    0.02
  -6   1  18   20.05    0.56
  -6   1  18   19.91    0.54
   6   1 -18   19.22    0.60
  -6   1  18   19.57    0.44
  -6   1  18   19.57    0.44
  -6   1  18   19.45    0.56
  -6   1  18   20.65    0.56
  -6  -1  18   20.08    0.56
  -6  -1  18   19.97    0.56
  -6  -1  18   19.63    0.53
  -6  -1  18   19.71    0.55
  -6  -1  18   20.10    0.44
   6  -1 -18   20.48    0.65
  -6  -1  18   20.10    0.44
  -6  -1  18   20.64    0.61
  -6   1  17    9.22    0.27
  -6   1  17    9.31    0.28
  -6   1  17    8.99    0.28
   6   1 -17    9.76    0.33
  -6   1  17    9.38    0.22
  -6   1  17    9.38    0.22
  -6   1  17    9.59    0.29
  -6  -1  17    9.60    0.22
   6  -1 -17    9.36    0.33
  -6  -1  17    9.17    0.27
  -6  -1  17    9.60    0.22
  -6  -1  17    9.23    0.28
  -6  -1  17    8.81    0.31
  -6  -1  17    9.15    0.28
  -6  -1  17    9.07    0.28
  -6   1  16    5.19    0.18
  -6   1  16    4.96    0.13
   6   1 -16    5.42    0.20
  -6   1  16    5.08    0.17
  -6   1  16    4.94    0.17
  -6   1  16    4.96    0.13
  -6   1  16    5.05    0.17
  -6  -1  16    4.83    0.17
  -6  -1  16    4.96    0.17
  -6  -1  16    5.08    0.14
  -6  -1  16    5.02    0.16
  -6  -1  16    4.87    0.19
  -6  -1  16    5.15    0.17
   6  -1 -16    5.05    0.20
  -6  -1  16    5.08    0.14
   6   1 -15    4.58    0.18
  -6   1  15    4.24    0.12
  -6   1  15    4.40    0.16
  -6   1  15    4.24    0.12
  -6   1  15    4.18    0.15
  -6   1  15    4.39    0.15
  -6   1  15    4.31    0.15
  -6  -1  15    4.11    0.12
  -6  -1  15    4.28    0.17
  -6  -1  15    4.28    0.15
  -6  -1  15    4.31    0.14
  -6  -1  15    4.11    0.12
   6  -1 -15    4.20    0.17
  -6  -1  15    4.34    0.15
   6   1 -14    3.61    0.18
   6   1 -14    3.88    0.16
  -6   1  14    3.70    0.16
   6   1 -14    3.52    0.17
   6  -1 -14    3.61    0.16
   6  -1 -14    3.81    0.17
   6  -1 -14    3.94    0.16
   6  -1 -14    3.67    0.16
   6   1 -13    2.37    0.11
  -6   1  13    2.25    0.11
   6   1 -13    2.13    0.12
   6   1 -13    2.36    0.12
   6  -1 -13    2.27    0.11
   6  -1 -13    2.24    0.12
   6  -1 -13    2.14    0.11
   6  -1 -13    2.19    0.11
   6   1 -12    4.88    0.19
   6   1 -12    4.85    0.21
   6   1 -12    5.18    0.20
  -6   1  12    5.35    0.20
   6  -1 -12    4.76    0.15
   6  -1 -12    5.01    0.20
   6  -1 -12    5.24    0.21
   6  -1 -12    4.76    0.15
   6  -1 -12    4.53    0.19
   6  -1 -12    5.14    0.19
   6   1 -11    7.53    0.29
   6   1 -11    7.31    0.30
   6   1 -11    7.53    0.27
   6   1 -11    7.77    0.28
  -6   1  11    7.81    0.27
   6  -1 -11    7.86    0.27
   6  -1 -11    7.43    0.29
   6  -1 -11    7.80    0.22
   6  -1 -11    8.37    0.27
   6  -1 -11    7.74    0.29
   6  -1 -11    7.80    0.22
   6   1 -10   11.24    0.41
   6   1 -10   11.37    0.38
   6   1 -10   11.39    0.40
  -6   1  10   10.94    0.37
   6   1 -10   10.40    0.37
   6  -1 -10   11.59    0.39
   6  -1 -10   11.60    0.39
   6  -1 -10   11.36    0.29
   6  -1 -10   10.65    0.37
   6  -1 -10   11.36    0.29
   6   1  -9    9.30    0.35
  -6   1   9    9.79    0.31
   6   1  -9    9.49    0.34
   6   1  -9    9.88    0.32
   6  -1  -9    9.48    0.25
   6  -1  -9    9.72    0.34
   6  -1  -9    9.48    0.25
   6  -1  -9    9.33    0.34
  -6   1   8    0.58    0.04
   6   1  -8    0.48    0.04
   6   1  -8    0.51    0.04
   6   1  -8    0.54    0.04
  -6   1   8    0.54    0.04
   6  -1  -8    0.54    0.04
   6  -1  -8    0.47    0.04
   6  -1  -8    0.56    0.03
   6  -1  -8    0.56    0.03
   6   1  -7    9.29    0.30
  -6   1   7    8.93    0.31
   6   1  -7    8.78    0.32
  -6   1   7    9.06    0.29
   6   1  -7    9.04    0.23
   6   1  -7    9.04    0.23
   6  -1  -7    9.27    0.31
   6  -1  -7    9.05    0.24
   6  -1  -7    9.05    0.24
   6  -1  -7    9.11    0.32
   6   1  -6   10.58    0.27
   6   1  -6   11.05    0.34
   6   1  -6   10.58    0.27
  -6   1   6   10.45    0.35
  -6   1   6   10.80    0.33
   6   1  -6   10.48    0.57
   6  -1  -6   10.05    0.35
   6  -1  -6   10.72    0.36
   6  -1  -6   10.51    0.27
   6  -1  -6   10.51    0.27
   6   1  -5    0.12    0.03
   6   1  -5    0.14    0.02
  -6   1   5    0.14    0.02
  -6   1   5    0.14    0.02
   6   1  -5    0.14    0.02
   6   1  -5    0.11    0.02
   6   1  -5    0.11    0.02
   6  -1  -5    0.13    0.02
   6  -1  -5    0.08    0.01
   6  -1  -5    0.12    0.02
   6  -1  -5    0.08    0.01
   6   1  -4   63.23    1.50
   6   1  -4   62.52    2.00
  -6   1   4   64.35    1.99
   6   1  -4   64.77    1.88
   6   1  -4   61.53    3.17
   6   1  -4   63.23    1.50
   6  -1  -4   65.09    3.17
   6  -1  -4   64.46    1.50
   6  -1  -4   64.11    1.99
   6  -1  -4   64.46    1.50
   6  -1  -4   63.13    2.07
   6   1  -3   54.90    1.32
   6   1  -3   55.37    1.76
   6   1  -3   54.90    1.32
   6   1  -3   56.67    2.80
   6  -1  -3   57.24    2.80
   6  -1  -3   57.04    1.32
   6  -1  -3   57.04    1.32
   6   1  -2    6.81    0.39
   6   1  -2    7.50    0.19
   6   1  -2    7.50    0.19
  -6   1   2    7.11    0.43
   6  -1  -2    7.01    0.18
   6  -1  -2    7.01    0.18
  -6  -1   2    7.04    0.25
   6  -1  -2    7.01    0.38
   6   1  -1   -0.01    0.01
   6   1  -1   -0.04    0.02
  -6   1   1   -0.02    0.02
   6   1  -1   -0.04    0.01
   6   1  -1   -0.01    0.01
   6  -1  -1   -0.02    0.02
  -6  -1   1   -0.01    0.01
   6   1   0    0.71    0.04
  -6   1   0    0.72    0.06
   6   1   0    0.71    0.03
   6   1   0    0.71    0.07
  -6   1   0    0.67    0.06
   6   1   0    0.71    0.03
  -6  -1   0    0.68    0.04
   6  -1   0    0.66    0.05
  -6   1  -1  140.08    8.61
   6   1   1  153.39    3.71
   6   1   1  162.98    9.11
   6   1   1  169.13    4.91
   6   1   1  148.92    7.83
  -6   1  -1  163.99    5.13
   6   1   1  153.39    3.71
  -6  -1  -1  155.28    5.10
   6  -1   1  157.34    7.78
  -6   1  -2   30.98    1.00
   6   1   2   29.71    0.73
   6   1   2   30.46    0.96
   6   1   2   30.14    1.54
   6   1   2   30.68    1.77
   6   1   2   29.71    0.73
  -6  -1  -2   29.96    0.98
   6   1   3   16.97    0.42
   6   1   3   17.10    0.90
   6   1   3   17.10    0.56
   6   1   3   16.82    1.01
   6   1   3   16.97    0.42
  -6   1  -3   17.71    0.58
  -6  -1  -3   16.95    0.56
  -6  -1  -3   16.91    0.89
   6   1   4    1.15    0.06
  -6   1  -4    0.95    0.05
   6   1   4    1.13    0.05
   6   1   4    1.13    0.05
   6   1   5    3.95    0.15
  -6   1  -5    3.86    0.15
   6   1   5    3.94    0.12
   6   1   5    3.94    0.12
   6   1   6    9.41    0.25
  -6   1  -6    8.73    0.32
   6   1   6    9.41    0.25
  -6   1  -7   26.35    0.88
  -6   1  -8    1.75    0.09
  -6   1  -9    9.10    0.30
  -6   1  -9    8.75    0.32
  -6   1 -10    1.90    0.09
  -6   1 -10    1.83    0.10
  -6   1 -11    3.27    0.13
  -6   1 -11    3.17    0.15
  -6   1 -12    0.03    0.02
  -6   1 -12    0.02    0.02
  -6   1 -13    0.29    0.04
   6  -1  13    0.32    0.04
   6  -1  13    0.28    0.04
   6  -1  13    0.25    0.03
   6  -1  13    0.27    0.03
   6  -1  13    0.35    0.05
   6  -1  13    0.27    0.03
  -6   1 -14    1.38    0.08
   6  -1  14    1.42    0.06
   6  -1  14    1.34    0.07
   6  -1  14    1.38    0.07
   6  -1  14    1.28    0.07
   6  -1  14    1.53    0.08
   6  -1  14    1.42    0.06
  -6   1 -15    1.14    0.07
   6  -1  15    1.16    0.07
   6  -1  15    1.19    0.06
   6  -1  15    1.13    0.06
   6  -1  15    1.10    0.05
   6  -1  15    1.13    0.06
   6  -1  15    1.10    0.05
  -6   1 -16    5.15    0.20
   6  -1  16    5.56    0.14
   6  -1  16    5.79    0.20
   6  -1  16    5.56    0.14
   6  -1  16    5.34    0.18
   6  -1  16    5.56    0.18
   6  -1  16    5.73    0.17
   6  -1  17    4.91    0.12
   6  -1  17    4.78    0.17
   6  -1  17    4.99    0.15
   6  -1  17    4.91    0.12
   6  -1  17    4.74    0.16
   6  -1  17    5.02    0.16
   6  -1  18    0.19    0.02
   6  -1  18    0.19    0.02
   6  -1  18    0.20    0.02
   6  -1  18    0.21    0.02
   6  -1  18    0.23    0.02
   6  -1  18    0.19    0.02
  -6   2  19    9.27    0.26
  -6   2  19    9.56    0.27
  -6   2  19    9.14    0.27
  -6   2  19    9.59    0.27
   6   2 -19    9.37    0.29
  -6  -2  19    9.44    0.29
  -6  -2  19    9.31    0.21
  -6  -2  19    9.28    0.26
  -6  -2  19    9.31    0.21
   6   2 -18    0.97    0.05
  -6   2  18    1.02    0.05
  -6   2  18    1.00    0.05
  -6   2  18    0.96    0.05
  -6   2  18    1.03    0.05
  -6  -2  18    1.00    0.05
  -6  -2  18    0.95    0.04
  -6  -2  18    0.95    0.04
  -6  -2  18    0.90    0.05
  -6  -2  18    1.02    0.04
  -6   2  17    0.08    0.02
  -6   2  17    0.07    0.02
  -6   2  17    0.08    0.02
  -6   2  17    0.07    0.02
  -6  -2  17    0.07    0.02
  -6  -2  17    0.07    0.02
   6  -2 -17    0.08    0.02
  -6  -2  17    0.11    0.02
  -6  -2  17    0.07    0.02
  -6  -2  17    0.11    0.03
  -6   2  16    2.69    0.11
  -6   2  16    2.68    0.11
  -6   2  16    2.70    0.11
  -6   2  16    2.63    0.10
  -6  -2  16    2.65    0.08
  -6  -2  16    2.61    0.09
  -6  -2  16    2.65    0.08
   6  -2 -16    2.68    0.12
  -6  -2  16    2.64    0.12
  -6  -2  16    2.44    0.10
  -6   2  15    7.84    0.25
  -6   2  15    7.88    0.25
  -6   2  15    7.62    0.24
  -6   2  15    7.75    0.25
  -6  -2  15    7.99    0.27
  -6  -2  15    7.89    0.24
  -6  -2  15    7.78    0.19
  -6  -2  15    7.68    0.23
  -6  -2  15    7.78    0.19
   6  -2 -15    7.69    0.28
  -6   2  14   10.47    0.31
  -6   2  14   10.29    0.30
  -6   2  14   10.10    0.31
  -6   2  14   10.18    0.31
   6  -2 -14   10.02    0.35
  -6  -2  14    9.85    0.24
  -6  -2  14   10.05    0.30
  -6  -2  14    9.96    0.29
  -6  -2  14    9.85    0.24
  -6  -2  14   10.05    0.34
   6   2 -13   11.38    0.40
  -6   2  13   10.84    0.38
   6  -2 -13   10.82    0.37
   6  -2 -13   11.09    0.40
   6  -2 -13   10.45    0.40
   6  -2 -13   10.96    0.38
   6   2 -12    8.28    0.31
  -6   2  12    8.09    0.29
   6   2 -12    7.99    0.33
   6  -2 -12    8.09    0.31
   6  -2 -12    8.11    0.24
   6  -2 -12    8.11    0.24
   6  -2 -12    8.56    0.29
   6  -2 -12    8.06    0.31
  -6   2  11   25.07    0.80
   6   2 -11   27.40    0.82
  -6   2  11   25.79    0.85
   6   2 -11   25.77    0.87
   6  -2 -11   24.97    0.82
   6  -2 -11   25.19    0.64
   6  -2 -11   25.51    0.85
   6  -2 -11   25.44    0.87
   6  -2 -11   25.19    0.64
  -6   2  10    4.53    0.17
   6   2 -10    4.30    0.19
   6   2 -10    4.63    0.20
  -6   2  10    4.55    0.19
   6  -2 -10    4.53    0.18
   6  -2 -10    4.47    0.14
   6  -2 -10    4.50    0.19
   6  -2 -10    4.47    0.14
   6  -2 -10    4.38    0.17
   6   2  -9    1.23    0.08
  -6   2   9    1.23    0.07
  -6   2   9    1.24    0.07
   6   2  -9    1.33    0.09
   6  -2  -9    1.14    0.06
   6  -2  -9    1.19    0.07
   6  -2  -9    1.14    0.06
   6  -2  -9    1.19    0.07
   6  -2  -9    1.14    0.06
   6   2  -8   39.18    1.24
  -6   2   8   37.10    1.22
  -6   2   8   36.76    1.14
   6   2  -8   38.10    1.16
   6  -2  -8   38.51    1.19
   6  -2  -8   38.31    0.92
   6  -2  -8   36.48    1.22
   6  -2  -8   38.31    0.92
   6  -2  -8   39.29    1.26
   6   2  -7    2.17    0.10
   6   2  -7    2.01    0.11
  -6   2   7    2.02    0.09
  -6   2   7    2.15    0.10
   6  -2  -7    2.07    0.10
   6  -2  -7    2.21    0.08
   6  -2  -7    2.29    0.10
   6  -2  -7    2.21    0.08
   6   2  -6   10.96    0.36
   6   2  -6   11.01    0.39
  -6   2   6   10.76    0.35
  -6   2   6   10.92    0.37
   6  -2  -6   10.71    0.28
   6  -2  -6   10.71    0.28
   6  -2  -6   10.80    0.37
   6  -2  -6   11.08    0.38
   6   2  -5   17.84    0.62
   6   2  -5   18.83    0.46
   6   2  -5   18.21    0.58
   6   2  -5   18.83    0.46
  -6   2   5   18.47    0.57
  -6   2   5   18.59    0.61
   6  -2  -5   19.41    0.63
   6  -2  -5   18.40    0.46
   6  -2  -5   18.40    0.46
  -6   2   4    5.16    0.18
  -6   2   4    5.19    0.19
   6   2  -4    5.31    0.15
   6   2  -4    5.36    0.20
   6   2  -4    5.31    0.15
   6   2  -4    5.44    0.19
   6  -2  -4    5.05    0.20
   6  -2  -4    5.09    0.15
   6  -2  -4    5.09    0.15
   6   2  -3    6.35    0.22
   6   2  -3    6.56    0.18
   6   2  -3    6.42    0.24
  -6   2   3    6.31    0.23
  -6   2   3    6.39    0.21
   6   2  -3    6.56    0.18
  -6  -2   3    6.74    0.25
   6  -2  -3    6.66    0.17
   6  -2  -3    6.66    0.17
   6   2  -2   98.52    2.30
   6   2  -2   95.47    2.88
   6   2  -2   97.20    3.06
  -6   2   2  110.00    2.90
   6   2  -2   98.52    2.30
  -6   2   2   87.36    5.66
   6  -2  -2   99.36    2.31
   6  -2  -2   99.36    2.31
  -6  -2   2   94.10    3.19
   6   2  -1    0.06    0.02
  -6   2   1    0.06    0.01
   6   2  -1    0.05    0.01
   6   2  -1    0.05    0.01
   6   2  -1    0.06    0.02
  -6  -2   1    0.03    0.02
   6  -2  -1    0.11    0.03
   6  -2  -1    0.09    0.01
   6  -2  -1    0.09    0.01
   6   2   0    0.35    0.03
   6   2   0    0.35    0.03
   6   2   0    0.27    0.03
   6   2   0    0.32    0.04
  -6  -2   0    0.25    0.03
   6   2   1   10.32    0.28
   6   2   1   10.26    0.34
   6   2   1   10.32    0.28
   6   2   1   11.20    0.37
  -6  -2  -1   10.87    0.37
   6   2   2    3.63    0.12
  -6   2  -2    3.93    0.15
   6   2   2    3.67    0.15
   6   2   2    3.63    0.12
   6   2   2    3.66    0.14
  -6  -2  -2    3.62    0.14
   6   2   3   24.80    0.75
  -6   2  -3   24.63    0.84
   6   2   3   24.99    0.62
   6   2   3   24.16    0.81
   6   2   3   24.99    0.62
  -6  -2  -3   25.11    0.82
   6   2   4    1.06    0.06
  -6   2  -4    1.03    0.07
   6   2   4    1.16    0.06
   6   2   4    1.16    0.07
   6   2   4    1.16    0.06
  -6  -2  -4    1.13    0.05
  -6   2  -5    1.55    0.09
   6   2   5    1.78    0.08
   6   2   5    1.61    0.07
   6   2   5    1.61    0.07
   6   2   5    1.69    0.09
  -6  -2  -5    1.60    0.07
   6   2   6    0.35    0.03
  -6   2  -6    0.30    0.04
  -6   2  -6    0.32    0.04
   6   2   6    0.32    0.04
   6   2   6    0.32    0.04
   6   2   6    0.30    0.04
  -6  -2  -6    0.33    0.02
   6   2   7   11.34    0.41
   6   2   7   10.98    0.37
   6   2   7   11.82    0.32
  -6   2  -7   11.84    0.42
  -6   2  -7   11.39    0.39
   6   2   7   11.82    0.32
  -6  -2  -7   11.81    0.39
  -6   2  -8    0.87    0.06
  -6   2  -8    0.87    0.07
   6   2   8    0.89    0.07
   6   2   8    0.80    0.05
   6   2   8    0.80    0.05
  -6  -2  -8    0.92    0.04
  -6   2  -9   10.44    0.37
  -6   2  -9   11.08    0.40
  -6   2 -10    0.04    0.02
  -6   2 -10    0.05    0.02
  -6   2 -11    0.05    0.03
  -6   2 -11    0.04    0.02
  -6   2 -12    0.08    0.03
   6  -2  12    0.07    0.02
   6  -2  12    0.10    0.03
   6  -2  12    0.07    0.03
   6  -2  12    0.07    0.02
   6  -2  12    0.16    0.03
   6  -2  12    0.07    0.02
  -6   2 -13   13.45    0.45
   6  -2  13   13.57    0.38
   6  -2  13   13.81    0.39
   6  -2  13   12.34    0.31
   6  -2  13   13.22    0.43
   6  -2  13   12.34    0.31
   6  -2  13   13.47    0.39
  -6   2 -14    5.26    0.21
   6  -2  14    4.93    0.17
   6  -2  14    5.22    0.19
   6  -2  14    5.08    0.17
   6  -2  14    5.20    0.17
   6  -2  14    5.36    0.14
   6  -2  14    5.36    0.14
  -6   2 -15    0.61    0.05
   6  -2  15    0.70    0.05
   6  -2  15    0.71    0.04
   6  -2  15    0.68    0.05
   6  -2  15    0.71    0.04
   6  -2  15    0.74    0.05
   6  -2  15    0.63    0.04
   6  -2  16    0.60    0.04
   6  -2  16    0.69    0.03
   6  -2  16    0.59    0.04
   6  -2  16    0.69    0.03
   6  -2  16    0.54    0.04
   6  -2  16    0.55    0.04
   6  -2  17    0.46    0.03
   6  -2  17    0.52    0.03
   6  -2  17    0.50    0.04
   6  -2  17    0.52    0.03
   6  -2  17    0.55    0.03
   6  -2  17    0.55    0.03
  -6   3  18    1.11    0.05
  -6   3  18    1.14    0.05
  -6   3  18    1.18    0.05
   6   3 -18    1.16    0.05
  -6  -3  18    1.13    0.05
  -6   3  17    0.63    0.04
   6   3 -17    0.58    0.04
  -6   3  17    0.60    0.04
  -6   3  17    0.60    0.04
  -6  -3  17    0.58    0.04
  -6   3  16    5.02    0.17
  -6   3  16    5.07    0.16
   6   3 -16    5.11    0.18
  -6   3  16    5.40    0.17
  -6  -3  16    5.09    0.18
  -6  -3  16    4.97    0.15
  -6   3  15    6.66    0.21
  -6   3  15    6.83    0.21
  -6   3  15    6.38    0.20
   6   3 -15    6.70    0.22
  -6  -3  15    6.56    0.23
   6  -3 -15    6.63    0.24
  -6  -3  15    6.39    0.19
  -6   3  14    1.04    0.06
  -6   3  14    1.07    0.06
  -6   3  14    1.05    0.06
  -6  -3  14    1.04    0.06
  -6  -3  14    1.01    0.05
   6  -3 -14    1.18    0.07
  -6   3  13    0.05    0.02
  -6   3  13    0.07    0.02
  -6   3  13    0.09    0.03
   6  -3 -13    0.08    0.03
  -6  -3  13    0.07    0.02
  -6  -3  13    0.05    0.02
  -6   3  12    0.12    0.03
  -6   3  12    0.10    0.03
  -6   3  12    0.06    0.02
   6  -3 -12    0.11    0.03
  -6  -3  12    0.10    0.02
  -6  -3  12    0.13    0.03
   6   3 -11    0.65    0.08
  -6   3  11    0.76    0.07
   6  -3 -11    0.74    0.05
   6  -3 -11    0.78    0.06
   6  -3 -11    0.70    0.06
   6  -3 -11    0.72    0.06
   6  -3 -11    0.74    0.05
  -6   3  10    3.88    0.16
  -6   3  10    4.00    0.18
   6   3 -10    4.05    0.19
   6  -3 -10    3.76    0.13
   6  -3 -10    3.76    0.13
   6  -3 -10    3.85    0.16
   6  -3 -10    3.91    0.17
   6  -3 -10    3.76    0.17
  -6   3   9    4.39    0.18
   6   3  -9    4.37    0.20
   6   3  -9    4.31    0.21
  -6   3   9    4.40    0.19
   6  -3  -9    4.56    0.19
   6  -3  -9    4.63    0.18
   6  -3  -9    4.49    0.15
   6  -3  -9    4.36    0.19
   6  -3  -9    4.49    0.15
   6   3  -8    0.64    0.07
  -6   3   8    0.75    0.06
   6   3  -8    0.76    0.07
  -6   3   8    0.77    0.06
   6  -3  -8    0.75    0.05
   6  -3  -8    0.72    0.06
   6  -3  -8    0.86    0.06
   6  -3  -8    0.66    0.05
   6  -3  -8    0.75    0.05
  -6   3   7    5.74    0.21
   6   3  -7    5.54    0.23
  -6   3   7    5.58    0.22
   6   3  -7    5.36    0.24
   6  -3  -7    5.74    0.21
   6  -3  -7    5.80    0.22
   6  -3  -7    5.63    0.17
   6  -3  -7    5.56    0.23
   6  -3  -7    5.63    0.17
  -6   3   6    7.08    0.28
  -6   3   6    7.33    0.26
   6   3  -6    7.69    0.30
   6   3  -6    7.80    0.28
   6  -3  -6    7.61    0.22
   6  -3  -6    7.62    0.29
   6  -3  -6    7.61    0.22
   6  -3  -6    7.61    0.27
   6   3  -5    6.43    0.27
  -6   3   5    6.68    0.23
   6   3  -5    6.23    0.25
   6  -3  -5    6.57    0.24
   6  -3  -5    6.74    0.19
   6  -3  -5    6.74    0.19
   6   3  -4   10.05    0.38
   6   3  -4    9.81    0.35
  -6   3   4   10.34    0.34
   6  -3  -4   10.18    0.27
   6  -3  -4    9.95    0.34
   6  -3  -4   10.18    0.27
   6   3  -3    6.84    0.20
   6   3  -3    6.46    0.26
   6   3  -3    6.84    0.20
   6   3  -3    6.69    0.25
  -6   3   3    6.71    0.23
  -6  -3   3    6.51    0.24
   6  -3  -3    6.60    0.19
   6  -3  -3    6.60    0.19
   6   3  -2    1.37    0.09
  -6   3   2    1.25    0.07
   6   3  -2    1.35    0.08
   6   3  -2    1.33    0.06
   6   3  -2    1.33    0.06
  -6  -3   2    1.18    0.08
  -6  -3   2    1.37    0.07
  -6   3   1    0.95    0.06
   6   3  -1    0.98    0.05
   6   3  -1    0.99    0.06
   6   3  -1    0.88    0.07
   6   3  -1    0.98    0.05
  -6  -3   1    0.98    0.07
   6   3   0    0.27    0.04
   6   3   0    0.27    0.04
   6   3   0    0.23    0.03
   6   3   0    0.23    0.03
  -6  -3   0    0.31    0.03
  -6  -3   0    0.29    0.04
   6   3   1    2.90    0.11
   6   3   1    3.10    0.15
   6   3   1    2.90    0.11
   6   3   1    3.04    0.13
  -6  -3  -1    2.89    0.12
  -6  -3  -1    3.07    0.14
   6   3   2    2.56    0.10
   6   3   2    2.49    0.13
   6   3   2    2.58    0.12
   6   3   2    2.56    0.10
  -6  -3  -2    2.72    0.11
  -6  -3  -2    2.51    0.12
   6   3   3    2.43    0.13
   6   3   3    2.50    0.10
   6   3   3    2.55    0.11
   6   3   3    2.50    0.10
  -6  -3  -3    2.48    0.12
  -6  -3  -3    2.48    0.10
   6   3   4    0.10    0.03
   6   3   4    0.10    0.02
   6   3   4    0.12    0.03
   6   3   4    0.10    0.02
  -6  -3  -4    0.10    0.02
  -6  -3  -4    0.12    0.03
   6   3   5    3.02    0.12
   6   3   5    3.14    0.15
   6   3   5    2.92    0.13
   6   3   5    3.02    0.12
  -6  -3  -5    2.97    0.14
   6   3   6    0.16    0.03
   6   3   6    0.23    0.04
  -6   3  -6    0.13    0.03
   6   3   6    0.16    0.03
   6   3   6    0.12    0.03
  -6  -3  -6    0.17    0.03
   6   3   7    8.07    0.32
   6   3   7    7.74    0.28
  -6   3  -7    8.11    0.30
   6   3   7    8.35    0.25
   6   3   7    8.35    0.25
  -6  -3  -7    7.94    0.30
  -6   3  -8    0.16    0.03
   6   3   8    0.18    0.03
   6   3   8    0.18    0.03
   6   3   8    0.11    0.03
   6   3   9    0.42    0.05
   6   3   9    0.42    0.05
   6   3   9    0.43    0.06
  -6   3  -9    0.54    0.05
  -6  -3  -9    0.54    0.05
  -6  -3  -9    0.60    0.04
  -6  -3  -9    0.54    0.05
   6   3  10    0.32    0.04
  -6   3 -10    0.31    0.04
   6  -3  10    0.34    0.04
   6  -3  10    0.33    0.03
   6  -3  10    0.35    0.04
   6   3  11    0.09    0.02
  -6   3 -11    0.12    0.03
   6  -3  11    0.08    0.03
   6  -3  11    0.12    0.02
   6  -3  11    0.11    0.03
   6  -3  11    0.15    0.03
  -6   3 -12   15.25    0.52
   6  -3  12   14.78    0.44
   6  -3  12   15.01    0.44
   6  -3  12   15.38    0.48
   6  -3  12   15.71    0.43
  -6   3 -13    1.20    0.08
   6  -3  13    1.19    0.05
   6  -3  13    1.19    0.05
   6  -3  13    1.13    0.07
   6  -3  13    1.17    0.06
   6  -3  13    1.13    0.06
   6  -3  13    1.16    0.06
   6  -3  14    0.01    0.01
   6  -3  14    0.02    0.01
   6  -3  14    0.02    0.01
   6  -3  14   -0.01    0.02
   6  -3  14    0.02    0.01
   6  -3  14    0.05    0.02
   6  -3  15    1.90    0.06
   6  -3  15    1.83    0.07
   6  -3  15    1.89    0.08
   6  -3  15    1.90    0.06
   6  -3  15    1.94    0.07
   6  -3  15    1.94    0.07
   6  -3  16    0.00    0.01
   6  -3  16    0.00    0.01
   6  -3  16    0.01    0.01
   6  -3  16    0.00    0.01
   6  -3  16    0.00    0.01
  -6   4  16    0.53    0.03
  -6   4  16    0.58    0.03
  -6   4  16    0.53    0.03
   6  -4 -16    0.54    0.03
  -6   4  15    1.34    0.06
  -6   4  15    1.25    0.06
  -6   4  15    1.24    0.05
  -6   4  14    0.08    0.02
  -6   4  14    0.05    0.02
  -6   4  14    0.08    0.02
  -6   4  13    0.94    0.06
  -6   4  13    0.87    0.05
  -6   4  13    0.95    0.05
   6  -4 -13    0.92    0.06
  -6  -4  13    0.83    0.04
  -6   4  12    0.15    0.03
  -6   4  12    0.17    0.03
  -6   4  12    0.20    0.03
   6  -4 -12    0.16    0.03
  -6  -4  12    0.19    0.02
  -6   4  11   19.91    0.57
  -6   4  11   20.12    0.57
  -6   4  11   19.36    0.54
  -6  -4  11   19.74    0.53
   6  -4 -11   19.75    0.65
  -6   4  10    2.13    0.10
  -6   4  10    2.08    0.09
  -6   4  10    2.08    0.10
  -6  -4  10    2.38    0.08
   6  -4 -10    2.13    0.11
  -6   4   9    1.65    0.08
  -6   4   9    1.57    0.08
   6  -4  -9    1.60    0.09
  -6  -4   9    1.53    0.07
   6   4  -8    0.32    0.03
  -6   4   8    0.37    0.04
  -6   4   8    0.32    0.04
   6  -4  -8    0.27    0.04
  -6  -4   8    0.33    0.03
   6   4  -7   10.66    0.40
  -6   4   7   10.39    0.37
   6  -4  -7   10.99    0.30
   6  -4  -7   10.36    0.38
   6  -4  -7   10.99    0.30
   6   4  -6    0.90    0.08
  -6   4   6    0.78    0.06
   6  -4  -6    0.98    0.06
   6  -4  -6    0.87    0.06
   6  -4  -6    0.98    0.06
   6   4  -5   31.64    1.07
  -6   4   5   31.05    0.98
   6   4  -5   32.54    1.01
   6   4  -4    6.12    0.27
   6   4  -4    6.34    0.26
  -6   4   4    6.52    0.24
   6   4  -3   17.59    0.58
   6   4  -3   17.05    0.62
   6   4  -2    2.86    0.16
   6   4  -2    3.02    0.15
  -6  -4   2    2.92    0.12
   6   4  -1    0.88    0.08
   6   4  -1    0.97    0.07
  -6  -4   1    0.79    0.05
   6   4   0    0.01    0.02
   6   4   0    0.02    0.02
   6   4   0    0.02    0.02
   6   4   0   -0.01    0.02
  -6  -4   0    0.04    0.02
  -6  -4   0    0.00    0.02
   6   4   1    0.41    0.06
   6   4   1    0.54    0.06
   6   4   1    0.51    0.06
   6   4   1    0.54    0.06
  -6  -4  -1    0.60    0.07
  -6  -4  -1    0.47    0.04
   6   4   2    4.30    0.16
   6   4   2    4.53    0.19
   6   4   2    4.42    0.21
   6   4   2    4.30    0.16
  -6  -4  -2    4.45    0.17
  -6  -4  -2    4.62    0.21
   6   4   3    0.06    0.02
   6   4   3    0.05    0.03
   6   4   3    0.08    0.03
   6   4   3    0.06    0.02
  -6  -4  -3    0.02    0.02
  -6  -4  -3    0.07    0.02
   6   4   4    1.44    0.09
   6   4   4    1.28    0.08
   6   4   4    1.34    0.10
   6   4   4    1.28    0.08
  -6  -4  -4    1.27    0.09
  -6  -4  -4    1.43    0.08
   6   4   5    1.09    0.07
   6   4   5    0.95    0.07
   6   4   5    1.09    0.07
   6   4   5    1.05    0.09
  -6  -4  -5    1.10    0.08
  -6  -4  -5    0.98    0.06
   6   4   6   25.29    0.67
   6  -4   6   24.14    0.69
  -6  -4  -6   24.79    0.79
   6  -4   6   24.52    0.68
   6   4   7    0.05    0.02
  -6  -4  -7    0.04    0.02
   6  -4   7    0.03    0.02
   6  -4   7    0.06    0.02
   6   4   8    7.57    0.24
   6  -4   8    8.07    0.24
   6  -4   8    8.02    0.24
  -6  -4  -8    7.93    0.28
   6   4   9    0.07    0.02
   6  -4   9    0.05    0.02
   6  -4   9    0.06    0.02
  -6  -4  -9    0.10    0.02
   6   4  10    2.65    0.10
   6  -4  10    2.69    0.10
   6  -4  10    2.69    0.10
  -6  -4 -10    2.72    0.11
   6   4  11    0.32    0.03
  -6  -4 -11    0.32    0.03
   6  -4  11    0.26    0.03
   6  -4  11    0.28    0.03
   6   4  12    0.10    0.02
   6  -4  12    0.11    0.02
   6  -4  12    0.07    0.02
   6   4  13    2.48    0.08
   6  -4  13    2.44    0.08
   6  -4  13    2.22    0.08
   6  -4  14    0.16    0.02
   6  -4  14    0.14    0.02
  -6   5  13    0.30    0.02
  -6   5  12    0.62    0.04
  -6   5  12    0.62    0.03
  -6   5  11    5.72    0.19
  -6   5  11    6.65    0.19
   6  -5 -11    6.12    0.19
  -6   5  10    0.12    0.02
  -6   5  10    0.12    0.02
   6  -5 -10    0.15    0.02
  -6  -5  10    0.13    0.02
  -6   5   9    0.51    0.04
  -6   5   9    0.50    0.04
   6  -5  -9    0.50    0.04
  -6  -5   9    0.51    0.03
  -6   5   8    3.53    0.13
  -6   5   8    3.60    0.13
  -6  -5   8    3.61    0.11
   6  -5  -8    3.64    0.13
  -6   5   7    0.28    0.03
  -6   5   7    0.24    0.03
   6  -5  -7    0.25    0.03
  -6  -5   7    0.42    0.03
  -6   5   6    6.48    0.21
   6   5  -6    6.53    0.20
  -6  -5   6    6.63    0.19
   6  -5  -6    6.97    0.21
   6  -5  -6    6.62    0.21
   6   5  -5    1.35    0.06
  -6   5   5    1.31    0.07
   6  -5  -5    1.31    0.07
  -6  -5   5    1.32    0.06
   6  -5  -5    1.32    0.07
  -6   5   4    0.10    0.02
   6   5  -4    0.12    0.02
   6  -5  -4    0.09    0.02
   6  -5  -4    0.09    0.02
  -6  -5   4    0.09    0.02
   6   5  -3    2.80    0.10
  -6   5   3    2.78    0.11
   6  -5  -3    2.94    0.11
   6  -5  -3    2.90    0.11
   6   5  -2    3.02    0.11
  -6   5   2    2.83    0.11
   6  -5  -2    2.99    0.11
   6  -5  -2    2.89    0.11
   6   5  -1   -0.01    0.01
  -6   5   1    0.06    0.02
   6  -5  -1    0.02    0.02
   6  -5  -1    0.02    0.02
   6   5   0    6.21    0.19
   6  -5   0    6.35    0.20
   6  -5   0    5.81    0.19
   6   5   1    4.14    0.13
   6  -5   1    3.81    0.13
   6  -5   1    4.07    0.13
  -6  -5  -1    3.69    0.16
   6   5   2    3.49    0.12
   6  -5   2    3.40    0.12
   6  -5   2    3.39    0.12
  -6  -5  -2    3.50    0.14
   6   5   3    0.01    0.02
  -6  -5  -3    0.01    0.02
   6  -5   3    0.02    0.02
   6  -5   3    0.01    0.02
   6   5   4    7.68    0.22
   6  -5   4    7.45    0.23
  -6  -5  -4    7.38    0.27
   6  -5   4    7.53    0.23
   6   5   5    0.01    0.01
  -6  -5  -5    0.01    0.01
   6  -5   5    0.00    0.01
   6  -5   5    0.00    0.01
   6   5   6    0.58    0.04
   6  -5   6    0.58    0.04
   6  -5   6    0.59    0.04
  -6  -5  -6    0.56    0.04
   6   5   7   18.15    0.48
   6  -5   7   18.06    0.49
  -6  -5  -7   17.37    0.57
   6  -5   7   17.42    0.50
   6   5   8    0.14    0.02
   6  -5   8    0.15    0.02
   6  -5   8    0.17    0.02
   6   5   9    0.35    0.03
   6  -5   9    0.32    0.03
   6  -5   9    0.31    0.02
   6   5  10    1.95    0.07
   6  -5  10    1.91    0.07
   6  -5  10    1.99    0.07
   6   5  11    0.02    0.01
   6  -5  11    0.00    0.01
   6  -6  -8    0.24    0.02
   6  -6  -7    1.01    0.04
   6  -6  -6    0.67    0.03
  -6  -6   6    0.66    0.03
  -6  -6   5    0.34    0.02
   6  -6  -5    0.38    0.03
   6  -6  -4    5.10    0.15
  -6  -6   4    4.74    0.14
   6   6  -3    0.02    0.01
   6  -6  -3    0.04    0.01
  -6  -6   3    0.03    0.01
   6   6  -2    0.49    0.03
   6  -6  -2    0.40    0.03
  -6  -6   2    0.45    0.03
   6   6  -1    2.93    0.10
   6  -6  -1    2.98    0.10
  -6  -6   1    3.19    0.10
   6   6   0    1.83    0.07
   6  -6   0    1.88    0.07
  -6  -6   0    1.90    0.07
   6   6   1    3.86    0.12
  -6  -6  -1    3.93    0.12
   6  -6   1    4.08    0.12
   6   6   2    0.86    0.04
   6  -6   2    0.89    0.04
   6   6   3    4.88    0.14
   6  -6   3    4.83    0.14
   6   6   4    0.72    0.03
   6  -6   4    0.69    0.03
   6   6   5    0.26    0.02
   6  -6   5    0.25    0.02
   6   6   6    0.00    0.01
   6  -6   6    0.03    0.01
  -7   0  20    0.35    0.03
  -7   0  20    0.35    0.03
  -7   0  20    0.34    0.03
  -7   0  20    0.34    0.02
  -7   0  20    0.34    0.02
  -7   0  20    0.36    0.03
  -7   0  19    0.01    0.01
  -7   0  19    0.00    0.01
  -7   0  19    0.00    0.01
  -7   0  19    0.00    0.01
  -7   0  19   -0.01    0.01
  -7   0  19    0.00    0.01
  -7   0  18    0.03    0.02
  -7   0  18    0.03    0.01
  -7   0  18    0.05    0.02
  -7   0  18    0.02    0.02
  -7   0  18    0.03    0.01
  -7   0  18    0.06    0.02
   7   0 -18    0.05    0.02
  -7   0  17    0.02    0.02
  -7   0  17    0.10    0.02
  -7   0  17   -0.01    0.02
  -7   0  17   -0.02    0.01
   7   0 -17    0.02    0.02
  -7   0  17   -0.02    0.01
  -7   0  17    0.01    0.02
  -7   0  16    1.57    0.08
  -7   0  16    1.51    0.07
  -7   0  16    1.46    0.08
  -7   0  16    1.57    0.07
  -7   0  16    1.39    0.08
  -7   0  16    1.46    0.06
   7   0 -16    1.56    0.09
  -7   0  16    1.46    0.06
  -7   0  15    0.05    0.02
  -7   0  15    0.04    0.02
   7   0 -15    0.00    0.02
  -7   0  15    0.05    0.02
  -7   0  15    0.02    0.02
  -7   0  15    0.03    0.02
  -7   0  15    0.03    0.02
  -7   0  15    0.04    0.02
   7   0 -14   50.46    1.56
   7   0 -14   49.58    1.52
   7   0 -14   48.46    1.66
   7   0 -14   50.67    1.61
   7   0 -13    0.01    0.02
   7   0 -13   -0.01    0.01
   7   0 -13    0.00    0.02
   7   0 -13   -0.01    0.01
   7   0 -12    8.17    0.31
   7   0 -12    8.31    0.29
   7   0 -12    8.09    0.29
   7   0 -12    8.02    0.31
   7   0 -11    0.03    0.02
   7   0 -11    0.00    0.01
   7   0 -11    0.02    0.02
   7   0 -11    0.00    0.01
   7   0 -10   53.07    1.28
  -7   0  10   54.37    1.61
   7   0 -10   50.59    1.67
   7   0 -10   53.07    1.28
   7   0 -10   54.53    1.71
   7   0 -10   56.25    1.61
   7   0 -10   55.32    1.78
  -7   0   9    0.00    0.01
   7   0  -9    0.00    0.01
   7   0  -9    0.06    0.01
   7   0  -9    0.00    0.01
   7   0  -9    0.06    0.01
   7   0  -9   -0.01    0.01
   7   0  -8   11.74    0.30
   7   0  -8   11.74    0.30
  -7   0   8   11.40    0.37
   7   0  -8   11.40    0.39
   7   0  -8   11.88    0.37
   7   0  -8   11.58    0.41
   7   0  -7    0.01    0.01
   7   0  -7    0.01    0.01
  -7   0   7    0.01    0.01
   7   0  -7    0.01    0.01
   7   0  -7    0.00    0.01
   7   0  -7    0.00    0.01
   7   0  -6   13.00    0.43
   7   0  -6   12.30    0.39
  -7   0   6   12.03    0.39
   7   0  -6   13.17    0.42
   7   0  -6   12.69    0.31
   7   0  -6   12.69    0.31
   7   0  -5    0.00    0.01
   7   0  -5    0.01    0.01
  -7   0   5    0.01    0.01
   7   0  -5    0.01    0.01
   7   0  -5    0.00    0.01
   7   0  -5    0.01    0.01
   7   0  -4    7.54    0.42
   7   0  -4    8.15    0.20
   7   0  -4    7.69    0.26
   7   0  -4    8.15    0.20
   7   0  -3    0.01    0.01
   7   0  -3    0.01    0.01
   7   0  -3    0.01    0.01
   7   0  -2  198.45   11.86
   7   0  -1    0.00    0.01
   7   0  -1   -0.01    0.01
   7   0  -1   -0.01    0.01
  -7   0   0  453.78   15.49
   7   0   0  477.29   24.65
  -7   0  -1   -0.01    0.01
  -7   0  -1    0.01    0.01
   7   0   1    0.00    0.01
  -7   0  -2    3.40    0.13
  -7   0  -2    3.93    0.21
   7   0   2    3.35    0.21
  -7   0  -4   19.32    0.64
  -7   0  -5   -0.04    0.01
  -7   0  -6    0.12    0.01
  -7   0  -7    0.02    0.01
  -7   0  -8   50.69    1.65
  -7   0  -9    0.02    0.01
  -7   0 -10    8.69    0.31
  -7   0 -11    0.00    0.01
  -7   0 -12   12.65    0.44
   7   0  13   -0.01    0.02
   7   0  13    0.08    0.02
   7   0  13    0.01    0.02
   7   0  13    0.02    0.02
   7   0  13    0.02    0.02
   7   0  14    0.16    0.03
   7   0  14    0.12    0.03
   7   0  14    0.15    0.03
   7   0  14    0.18    0.02
   7   0  14    0.18    0.02
   7   0  15    0.00    0.02
   7   0  15    0.02    0.02
   7   0  15    0.02    0.02
   7   0  15    0.06    0.02
   7   0  15   -0.01    0.02
   7   0  16    0.58    0.04
   7   0  16    0.69    0.04
   7   0  16    0.62    0.04
   7   0  16    0.69    0.04
   7   0  17    0.00    0.01
   7   0  17    0.00    0.01
   7   0  17   -0.01    0.01
   7   0  17    0.00    0.01
   7   0  18    0.08    0.01
   7   0  18    0.09    0.01
   7   0  18    0.08    0.01
   7   0  18    0.08    0.01
  -7   1  20    1.36    0.05
  -7   1  20    1.26    0.05
   7   1 -20    1.41    0.06
  -7   1  20    1.30    0.05
  -7   1  20    1.27    0.05
  -7  -1  20    1.39    0.04
  -7  -1  20    1.39    0.06
  -7  -1  20    1.39    0.04
  -7  -1  20    1.33    0.05
  -7   1  19    1.67    0.07
   7   1 -19    1.62    0.07
  -7   1  19    1.65    0.07
  -7   1  19    1.65    0.06
  -7   1  19    1.62    0.05
  -7   1  19    1.58    0.07
  -7   1  19    1.62    0.05
  -7  -1  19    1.68    0.06
   7  -1 -19    1.38    0.05
  -7  -1  19    1.59    0.05
   7  -1 -19    1.38    0.05
  -7  -1  19    1.59    0.05
  -7  -1  19    1.74    0.07
  -7  -1  19    1.66    0.06
  -7  -1  19    1.71    0.07
  -7   1  18    6.04    0.15
  -7   1  18    6.04    0.15
  -7   1  18    6.14    0.18
  -7   1  18    5.68    0.19
  -7   1  18    5.87    0.19
   7   1 -18    5.74    0.20
  -7   1  18    5.93    0.19
   7  -1 -18    5.66    0.22
  -7  -1  18    5.90    0.20
  -7  -1  18    6.01    0.18
  -7  -1  18    6.01    0.18
  -7  -1  18    5.82    0.18
  -7  -1  18    5.70    0.15
  -7  -1  18    5.70    0.15
  -7   1  17    0.03    0.02
  -7   1  17    0.07    0.02
  -7   1  17    0.05    0.02
  -7   1  17    0.06    0.02
  -7   1  17    0.10    0.02
  -7   1  17    0.10    0.02
   7   1 -17    0.05    0.02
  -7  -1  17    0.05    0.02
  -7  -1  17    0.09    0.02
  -7  -1  17    0.02    0.02
  -7  -1  17    0.05    0.02
   7  -1 -17    0.08    0.02
  -7  -1  17    0.03    0.02
  -7  -1  17    0.04    0.02
   7   1 -16    1.71    0.09
  -7   1  16    1.51    0.07
  -7   1  16    1.62    0.06
  -7   1  16    1.62    0.06
  -7   1  16    1.60    0.08
  -7   1  16    1.61    0.08
  -7   1  16    1.62    0.08
  -7  -1  16    1.62    0.07
  -7  -1  16    1.55    0.06
  -7  -1  16    1.66    0.09
   7  -1 -16    1.65    0.09
  -7  -1  16    1.67    0.07
  -7  -1  16    1.55    0.06
  -7  -1  16    1.60    0.08
  -7   1  15    0.15    0.03
   7   1 -15    0.17    0.03
  -7   1  15    0.21    0.03
  -7   1  15    0.16    0.03
  -7   1  15    0.18    0.02
  -7   1  15    0.21    0.03
  -7   1  15    0.18    0.02
  -7  -1  15    0.21    0.03
  -7  -1  15    0.20    0.03
  -7  -1  15    0.16    0.03
   7  -1 -15    0.16    0.03
  -7  -1  15    0.20    0.03
  -7  -1  15    0.23    0.03
  -7  -1  15    0.17    0.03
   7   1 -14    0.13    0.04
   7   1 -14    0.18    0.03
  -7   1  14    0.12    0.03
   7   1 -14    0.09    0.04
   7  -1 -14    0.14    0.03
   7  -1 -14    0.14    0.03
   7  -1 -14    0.11    0.03
   7  -1 -14    0.20    0.03
   7   1 -13    6.83    0.26
   7   1 -13    6.86    0.25
   7   1 -13    6.36    0.27
  -7   1  13    6.96    0.26
   7  -1 -13    6.92    0.27
   7  -1 -13    6.82    0.27
   7  -1 -13    6.88    0.25
   7  -1 -13    6.80    0.25
   7   1 -12   32.67    1.07
   7   1 -12   34.07    1.11
  -7   1  12   33.84    1.04
   7  -1 -12   35.27    1.07
   7  -1 -12   33.82    1.04
   7  -1 -12   34.11    1.14
   7  -1 -12   33.35    1.10
   7   1 -11    0.62    0.06
   7   1 -11    0.62    0.05
   7   1 -11    0.68    0.06
  -7   1  11    0.64    0.05
   7  -1 -11    0.63    0.04
   7  -1 -11    0.59    0.05
   7  -1 -11    0.63    0.04
   7  -1 -11    0.62    0.05
   7  -1 -11    0.68    0.05
   7  -1 -11    0.64    0.05
  -7   1  10    4.72    0.18
   7   1 -10    5.16    0.19
   7   1 -10    5.08    0.19
   7   1 -10    5.11    0.21
   7  -1 -10    5.11    0.19
   7  -1 -10    4.87    0.15
   7  -1 -10    5.08    0.20
   7  -1 -10    5.12    0.20
   7  -1 -10    4.87    0.15
   7  -1 -10    5.25    0.18
  -7   1   9   18.23    0.56
   7   1  -9   18.06    0.60
   7   1  -9   17.66    0.56
   7  -1  -9   17.52    0.45
   7  -1  -9   17.52    0.45
   7  -1  -9   17.91    0.61
   7  -1  -9   17.72    0.59
  -7   1   8   15.31    0.47
   7   1  -8   15.08    0.48
   7   1  -8   14.82    0.51
   7  -1  -8   15.31    0.38
   7  -1  -8   15.31    0.38
   7  -1  -8   15.54    0.51
   7  -1  -8   15.12    0.52
   7   1  -7    1.99    0.10
   7   1  -7    2.28    0.07
   7   1  -7    2.28    0.07
   7   1  -7    2.16    0.09
  -7   1   7    1.93    0.09
   7  -1  -7    2.00    0.09
   7  -1  -7    2.09    0.09
   7  -1  -7    2.51    0.08
   7  -1  -7    2.51    0.08
   7   1  -6   84.80    2.65
   7   1  -6   85.30    1.99
   7   1  -6   85.30    1.99
  -7   1   6   81.39    2.49
   7   1  -6   86.37    2.50
   7  -1  -6   84.19    1.99
   7  -1  -6   84.66    2.76
   7  -1  -6   84.19    1.99
   7  -1  -6   86.12    2.64
   7   1  -5   19.77    0.48
   7   1  -5   19.77    0.48
   7   1  -5   19.96    0.64
  -7   1   5   19.30    0.63
  -7   1   5   19.23    0.59
   7   1  -5   20.01    0.60
   7  -1  -5   19.65    0.63
   7  -1  -5   19.74    0.48
   7  -1  -5   19.74    0.48
   7  -1  -5   19.48    0.66
   7   1  -4   14.25    0.36
   7   1  -4   14.60    0.45
   7   1  -4   14.25    0.36
   7   1  -4   14.47    0.77
   7   1  -4   15.07    0.49
   7  -1  -4   14.30    0.49
   7  -1  -4   14.76    0.47
   7  -1  -4   15.06    0.36
   7  -1  -4   15.06    0.36
   7   1  -3   18.89    0.61
   7   1  -3   18.78    0.46
   7   1  -3   18.32    0.97
   7   1  -3   18.78    0.46
   7  -1  -3   18.61    0.96
   7  -1  -3   18.80    0.45
   7  -1  -3   18.80    0.45
  -7  -1   3   19.26    0.63
   7   1  -2   65.24    1.53
   7   1  -2   63.58    2.03
   7   1  -2   62.86    3.23
   7   1  -2   65.24    1.53
   7  -1  -2   66.16    1.52
   7  -1  -2   62.12    3.22
  -7  -1   2   66.26    2.11
   7  -1  -2   66.16    1.52
   7   1  -1    0.03    0.02
   7   1  -1    0.02    0.01
   7   1  -1    0.02    0.01
   7   1  -1    0.01    0.01
   7  -1  -1    0.07    0.01
  -7  -1   1    0.05    0.01
   7  -1  -1    0.07    0.01
   7  -1  -1    0.07    0.02
   7   1   0    1.88    0.14
   7   1   0    1.76    0.06
   7   1   0    1.76    0.06
   7   1   0    1.88    0.08
  -7   1   0    1.83    0.08
  -7   1   0    1.71    0.12
  -7  -1   0    1.82    0.08
   7  -1   0    1.85    0.11
   7   1   1   58.18    2.84
  -7   1  -1   54.23    2.81
   7   1   1   57.70    1.34
   7   1   1   57.70    1.34
  -7   1  -1   55.62    1.85
   7   1   1   58.19    1.78
   7   1   1   55.15    3.28
  -7  -1  -1   55.78    1.84
  -7   1  -2   80.05    2.81
   7   1   2   88.87    2.04
   7   1   2   88.87    2.04
   7   1   2   91.28    2.70
  -7  -1  -2   83.40    2.83
   7   1   3    1.80    0.07
  -7   1  -3    1.78    0.08
   7   1   3    1.80    0.07
   7   1   3    1.88    0.08
  -7  -1  -3    1.86    0.07
  -7   1  -4    1.19    0.06
   7   1   4    1.17    0.05
   7   1   4    1.17    0.05
   7   1   4    1.12    0.06
  -7  -1  -4    1.11    0.04
   7   1   5   42.43    1.02
   7   1   5   42.43    1.02
  -7   1  -5   41.96    1.39
  -7   1  -6    2.24    0.10
   7   1   6    2.14    0.08
   7   1   6    2.14    0.08
  -7   1  -7    0.08    0.02
  -7   1  -8   23.48    0.78
  -7   1  -8   22.81    0.73
  -7   1  -9   14.23    0.46
  -7   1  -9   14.20    0.50
  -7   1 -10    1.50    0.08
  -7   1 -10    1.55    0.09
  -7   1 -11    1.13    0.06
  -7   1 -11    1.00    0.07
  -7   1 -12    0.18    0.03
  -7   1 -12    0.18    0.03
  -7   1 -13    1.16    0.07
   7  -1  13    1.14    0.07
   7  -1  13    1.25    0.05
   7  -1  13    1.17    0.07
   7  -1  13    1.08    0.06
   7  -1  13    1.25    0.05
  -7   1 -14    0.58    0.05
   7  -1  14    0.59    0.05
   7  -1  14    0.51    0.04
   7  -1  14    0.55    0.04
   7  -1  14    0.54    0.04
   7  -1  14    0.55    0.04
  -7   1 -15    0.97    0.06
   7  -1  15    0.95    0.05
   7  -1  15    0.95    0.05
   7  -1  15    0.99    0.05
   7  -1  15    1.07    0.07
   7  -1  15    1.02    0.06
   7  -1  16    0.04    0.02
   7  -1  16    0.04    0.02
   7  -1  16    0.01    0.01
   7  -1  16    0.01    0.02
   7  -1  16    0.01    0.01
   7  -1  17    0.60    0.03
   7  -1  17    0.52    0.04
   7  -1  17    0.62    0.04
   7  -1  17    0.57    0.04
   7  -1  17    0.60    0.03
   7  -1  18    1.92    0.07
   7  -1  18    1.94    0.07
   7  -1  18    1.99    0.07
   7  -1  18    2.00    0.05
   7  -1  18    2.00    0.05
  -7   2  19    0.39    0.03
   7   2 -19    0.45    0.03
  -7   2  19    0.41    0.03
  -7   2  19    0.41    0.03
  -7   2  19    0.40    0.03
  -7  -2  19    0.45    0.03
  -7  -2  19    0.38    0.02
  -7  -2  19    0.45    0.03
  -7  -2  19    0.38    0.02
  -7   2  18    0.23    0.03
   7   2 -18    0.16    0.02
  -7   2  18    0.18    0.02
  -7   2  18    0.16    0.02
  -7   2  18    0.23    0.03
  -7  -2  18    0.16    0.02
  -7  -2  18    0.22    0.02
  -7  -2  18    0.22    0.02
  -7  -2  18    0.17    0.02
   7   2 -17    6.94    0.23
  -7   2  17    6.85    0.22
  -7   2  17    7.22    0.22
  -7   2  17    7.08    0.21
  -7   2  17    7.08    0.22
  -7  -2  17    6.76    0.17
   7  -2 -17    6.74    0.25
  -7  -2  17    6.76    0.17
  -7  -2  17    7.04    0.20
  -7  -2  17    7.22    0.24
  -7   2  16    1.89    0.08
  -7   2  16    1.72    0.08
  -7   2  16    1.71    0.08
  -7   2  16    1.80    0.08
  -7  -2  16    1.76    0.09
  -7  -2  16    1.71    0.07
  -7  -2  16    1.71    0.06
   7  -2 -16    1.73    0.09
  -7  -2  16    1.71    0.06
  -7   2  15    0.36    0.04
  -7   2  15    0.50    0.05
  -7   2  15    0.47    0.05
  -7   2  15    0.43    0.04
   7  -2 -15    0.40    0.05
  -7  -2  15    0.37    0.03
  -7  -2  15    0.37    0.03
  -7  -2  15    0.46    0.05
  -7  -2  15    0.44    0.04
  -7   2  14    1.01    0.06
  -7   2  14    1.05    0.06
  -7   2  14    1.04    0.06
  -7   2  14    1.17    0.06
  -7  -2  14    1.10    0.06
  -7  -2  14    1.09    0.07
   7  -2 -14    1.11    0.07
   7   2 -13    0.67    0.08
   7  -2 -13    0.69    0.06
   7  -2 -13    0.72    0.05
   7  -2 -13    0.72    0.05
   7  -2 -13    0.91    0.07
   7  -2 -13    0.77    0.07
   7  -2 -13    0.89    0.06
   7   2 -12    2.18    0.13
   7   2 -12    2.73    0.14
  -7   2  12    2.17    0.11
   7  -2 -12    2.24    0.09
   7  -2 -12    2.43    0.11
   7  -2 -12    2.47    0.12
   7  -2 -12    2.38    0.13
   7  -2 -12    2.24    0.09
  -7   2  11    2.50    0.12
   7   2 -11    2.74    0.14
   7   2 -11    2.58    0.14
   7  -2 -11    2.60    0.13
   7  -2 -11    2.58    0.12
   7  -2 -11    2.50    0.10
   7  -2 -11    2.50    0.10
   7  -2 -11    2.61    0.12
   7   2 -10    0.03    0.02
  -7   2  10    0.03    0.02
   7   2 -10    0.00    0.02
  -7   2  10    0.06    0.02
   7  -2 -10    0.02    0.01
   7  -2 -10    0.01    0.01
   7  -2 -10    0.02    0.02
   7  -2 -10    0.08    0.02
   7  -2 -10    0.01    0.01
   7   2  -9    2.20    0.11
  -7   2   9    2.06    0.10
  -7   2   9    2.09    0.11
   7   2  -9    2.17    0.12
   7  -2  -9    1.98    0.08
   7  -2  -9    2.13    0.10
   7  -2  -9    2.15    0.11
   7  -2  -9    2.09    0.10
   7  -2  -9    1.98    0.08
   7   2  -8   20.30    0.66
   7   2  -8   20.50    0.70
  -7   2   8   20.84    0.64
  -7   2   8   20.92    0.68
   7  -2  -8   20.18    0.52
   7  -2  -8   20.88    0.66
   7  -2  -8   21.09    0.70
   7  -2  -8   20.18    0.52
   7  -2  -8   21.31    0.68
  -7   2   7   40.86    1.26
   7   2  -7   42.13    1.36
   7   2  -7   41.90    1.28
  -7   2   7   42.59    1.34
   7  -2  -7   41.66    1.34
   7  -2  -7   40.99    1.39
   7  -2  -7   43.00    1.01
   7  -2  -7   43.00    1.01
  -7   2   6   61.02    1.92
  -7   2   6   60.66    1.80
   7   2  -6   61.67    1.82
   7   2  -6   60.49    1.94
   7  -2  -6   62.27    1.92
   7  -2  -6   61.08    1.45
   7  -2  -6   59.10    2.00
   7  -2  -6   61.08    1.45
   7   2  -5   16.13    0.55
   7   2  -5   16.41    0.41
   7   2  -5   15.93    0.51
  -7   2   5   16.04    0.53
   7   2  -5   16.41    0.41
  -7   2   5   16.00    0.50
   7  -2  -5   15.13    0.55
   7  -2  -5   16.11    0.53
   7  -2  -5   16.13    0.40
   7  -2  -5   16.13    0.40
   7   2  -4    3.68    0.15
   7   2  -4    3.48    0.11
  -7   2   4    3.37    0.13
   7   2  -4    3.48    0.11
   7   2  -4    3.85    0.14
  -7   2   4    3.50    0.13
   7  -2  -4    3.20    0.10
   7  -2  -4    3.20    0.10
   7   2  -3    7.72    0.29
   7   2  -3    7.93    0.22
   7   2  -3    7.68    0.27
   7   2  -3    7.93    0.22
   7  -2  -3    8.08    0.21
   7  -2  -3    8.08    0.21
  -7  -2   3    8.30    0.30
   7   2  -2   10.69    0.29
   7   2  -2   10.69    0.29
   7   2  -2   10.31    0.35
   7   2  -2   10.95    0.38
   7  -2  -2   11.24    0.27
   7  -2  -2   11.24    0.27
  -7  -2   2   10.64    0.39
   7   2  -1   58.27    1.84
   7   2  -1   58.62    1.38
   7   2  -1   58.62    1.38
   7   2  -1   57.85    1.72
  -7  -2   1   56.63    1.91
   7   2   0   20.13    0.65
   7   2   0   19.81    0.49
   7   2   0   18.56    0.60
   7   2   0   19.81    0.49
  -7  -2   0   19.91    0.67
   7   2   1    4.54    0.18
   7   2   1    4.60    0.16
   7   2   1    4.63    0.14
   7   2   1    4.63    0.14
  -7  -2  -1    4.62    0.18
   7   2   2    0.65    0.04
   7   2   2    0.64    0.05
  -7   2  -2    0.65    0.05
   7   2   2    0.65    0.04
   7   2   2    0.63    0.04
  -7  -2  -2    0.64    0.04
   7   2   3    4.24    0.17
   7   2   3    4.14    0.15
  -7   2  -3    4.36    0.17
   7   2   3    3.95    0.13
   7   2   3    3.95    0.13
  -7  -2  -3    4.07    0.16
   7   2   4   32.92    1.06
   7   2   4   32.93    0.81
   7   2   4   32.93    0.81
  -7   2  -4   32.63    1.10
  -7  -2  -4   32.92    1.08
   7   2   5    6.22    0.19
  -7   2  -5    6.17    0.22
   7   2   5    6.12    0.24
  -7   2  -5    6.07    0.24
   7   2   5    6.22    0.19
  -7  -2  -5    6.11    0.22
   7   2   6   17.98    0.46
   7   2   6   17.85    0.60
  -7   2  -6   17.79    0.62
  -7   2  -6   17.37    0.58
   7   2   6   17.98    0.46
  -7  -2  -6   17.48    0.59
  -7   2  -7    0.80    0.06
   7   2   7    0.82    0.05
  -7   2  -7    0.81    0.06
   7   2   7    0.79    0.06
   7   2   7    0.82    0.05
  -7  -2  -7    0.79    0.04
   7   2   8   13.94    0.37
  -7   2  -8   12.68    0.49
   7   2   8   13.94    0.37
  -7   2  -8   13.36    0.45
  -7  -2  -8   13.70    0.45
  -7   2  -9    4.00    0.17
  -7   2  -9    4.36    0.19
  -7   2 -10    0.60    0.06
  -7   2 -10    0.75    0.06
  -7   2 -11    7.90    0.31
  -7   2 -11    7.40    0.28
   7  -2  11    7.82    0.20
   7  -2  11    7.82    0.20
   7  -2  11    7.69    0.25
   7  -2  11    7.11    0.27
   7  -2  11    7.88    0.25
  -7   2 -12    0.33    0.05
   7  -2  12    0.36    0.04
   7  -2  12    0.28    0.03
   7  -2  12    0.27    0.04
   7  -2  12    0.32    0.04
   7  -2  12    0.28    0.03
   7  -2  12    0.32    0.04
  -7   2 -13    1.17    0.08
   7  -2  13    1.18    0.06
   7  -2  13    1.06    0.06
   7  -2  13    1.13    0.05
   7  -2  13    1.13    0.05
   7  -2  13    1.16    0.07
   7  -2  13    1.04    0.05
  -7   2 -14    4.77    0.19
   7  -2  14    4.56    0.15
   7  -2  14    4.60    0.18
   7  -2  14    4.68    0.15
   7  -2  14    4.70    0.16
   7  -2  14    4.48    0.13
   7  -2  14    4.48    0.13
  -7   2 -15    0.32    0.04
   7  -2  15    0.37    0.04
   7  -2  15    0.37    0.03
   7  -2  15    0.41    0.03
   7  -2  15    0.40    0.03
   7  -2  15    0.29    0.04
   7  -2  15    0.37    0.03
   7  -2  16    1.86    0.07
   7  -2  16    1.80    0.08
   7  -2  16    1.92    0.06
   7  -2  16    1.90    0.07
   7  -2  16    1.92    0.06
   7  -2  16    1.84    0.07
   7  -2  17    1.42    0.05
   7  -2  17    1.33    0.05
   7  -2  17    1.40    0.05
   7  -2  17    1.35    0.04
   7  -2  17    1.35    0.04
   7  -2  17    1.28    0.06
  -7   3  18    0.08    0.01
  -7   3  18    0.08    0.01
   7   3 -18    0.06    0.01
  -7   3  18    0.07    0.01
  -7  -3  18    0.06    0.01
  -7   3  17    0.36    0.03
  -7   3  17    0.34    0.03
   7   3 -17    0.43    0.03
  -7   3  17    0.39    0.03
  -7  -3  17    0.41    0.03
  -7  -3  17    0.42    0.03
  -7   3  16    2.88    0.10
  -7   3  16    2.64    0.10
   7   3 -16    2.65    0.11
  -7   3  16    2.68    0.10
  -7   3  16    2.73    0.10
  -7  -3  16    2.71    0.09
  -7  -3  16    2.76    0.11
   7  -3 -16    2.55    0.10
  -7   3  15    0.57    0.04
   7   3 -15    0.59    0.04
  -7   3  15    0.63    0.04
  -7   3  15    0.59    0.05
  -7   3  15    0.57    0.04
  -7  -3  15    0.57    0.05
   7  -3 -15    0.58    0.05
  -7  -3  15    0.55    0.04
  -7   3  14    0.07    0.02
  -7   3  14    0.09    0.03
  -7   3  14    0.06    0.02
   7   3 -14    0.06    0.02
  -7   3  14    0.08    0.02
  -7  -3  14    0.07    0.02
   7  -3 -14    0.07    0.02
  -7  -3  14    0.08    0.02
  -7   3  13    2.01    0.09
  -7   3  13    1.94    0.09
  -7   3  13    1.94    0.09
  -7   3  13    2.14    0.09
  -7  -3  13    2.04    0.10
  -7  -3  13    1.98    0.08
   7  -3 -13    2.07    0.11
  -7   3  12    3.15    0.12
  -7   3  12    3.12    0.12
  -7   3  12    3.23    0.13
  -7  -3  12    3.15    0.11
   7  -3 -12    3.32    0.14
  -7  -3  12    3.04    0.13
   7   3 -11    0.18    0.05
  -7   3  11    0.24    0.05
  -7   3  11    0.22    0.03
  -7   3  11    0.20    0.04
  -7   3  11    0.29    0.04
  -7   3  11    0.22    0.04
   7  -3 -11    0.25    0.05
  -7  -3  11    0.24    0.03
   7  -3 -11    0.19    0.03
   7  -3 -11    0.18    0.04
   7  -3 -11    0.17    0.03
   7  -3 -11    0.19    0.03
   7   3 -10    6.28    0.26
   7   3 -10    6.23    0.27
  -7   3  10    6.51    0.26
  -7   3  10    5.98    0.23
   7  -3 -10    6.36    0.20
   7  -3 -10    6.19    0.25
   7  -3 -10    6.54    0.25
   7  -3 -10    6.36    0.20
   7  -3 -10    6.29    0.24
  -7   3   9    0.02    0.02
   7   3  -9    0.03    0.02
   7   3  -9    0.03    0.03
  -7   3   9    0.19    0.04
   7  -3  -9    0.05    0.02
   7  -3  -9    0.08    0.03
   7  -3  -9    0.05    0.02
   7  -3  -9    0.16    0.04
   7  -3  -9    0.05    0.02
  -7   3   8    9.93    0.37
   7   3  -8   10.51    0.38
  -7   3   8    9.96    0.35
   7   3  -8   10.14    0.40
   7  -3  -8   10.87    0.29
   7  -3  -8   10.52    0.38
   7  -3  -8   10.15    0.37
   7  -3  -8   10.87    0.29
   7  -3  -8   10.37    0.36
   7   3  -7    2.26    0.12
  -7   3   7    2.34    0.11
  -7   3   7    2.32    0.11
   7   3  -7    2.45    0.14
   7  -3  -7    2.18    0.11
   7  -3  -7    2.36    0.09
   7  -3  -7    2.36    0.09
   7  -3  -7    2.49    0.11
  -7   3   6    3.80    0.15
   7   3  -6    3.65    0.18
   7   3  -6    3.63    0.16
   7  -3  -6    3.66    0.12
   7  -3  -6    3.66    0.12
   7  -3  -6    3.64    0.15
  -7   3   5   10.08    0.33
   7   3  -5    9.76    0.38
   7   3  -5   10.02    0.35
   7  -3  -5   10.18    0.35
   7  -3  -5   10.12    0.27
   7  -3  -5   10.12    0.27
   7   3  -4    2.53    0.14
   7   3  -4    2.73    0.13
   7  -3  -4    2.69    0.09
   7  -3  -4    2.69    0.09
   7   3  -3   15.78    0.56
   7   3  -3   15.82    0.42
   7   3  -3   15.82    0.42
   7   3  -3   16.86    0.52
  -7  -3   3   15.69    0.51
   7  -3  -3   16.01    0.41
   7  -3  -3   16.01    0.41
   7   3  -2    1.59    0.09
   7   3  -2    1.54    0.07
   7   3  -2    1.58    0.10
   7   3  -2    1.54    0.07
  -7  -3   2    1.55    0.07
  -7  -3   2    1.55    0.10
   7   3  -1    0.03    0.02
   7   3  -1    0.00    0.01
   7   3  -1    0.03    0.02
   7   3  -1    0.03    0.02
  -7  -3   1    0.00    0.01
  -7  -3   1    0.04    0.02
   7   3   0    9.53    0.36
   7   3   0    9.68    0.27
   7   3   0    9.53    0.33
   7   3   0    9.68    0.27
  -7  -3   0    9.43    0.32
  -7  -3   0    9.36    0.36
   7   3   1    1.08    0.06
   7   3   1    1.02    0.07
   7   3   1    1.06    0.08
   7   3   1    1.08    0.06
  -7  -3  -1    1.21    0.08
  -7  -3  -1    1.11    0.06
   7   3   2    4.51    0.15
   7   3   2    4.51    0.15
   7   3   2    4.41    0.17
   7   3   2    4.41    0.20
  -7  -3  -2    4.47    0.19
  -7  -3  -2    4.36    0.16
   7   3   3   22.28    0.57
   7   3   3   22.18    0.69
   7   3   3   22.28    0.57
   7   3   3   21.79    0.75
  -7  -3  -3   22.04    0.76
  -7  -3  -3   21.84    0.70
   7   3   4   12.94    0.35
   7   3   4   12.29    0.45
   7   3   4   12.94    0.35
   7   3   4   11.83    0.40
  -7  -3  -4   12.56    0.44
  -7  -3  -4   11.65    0.41
   7   3   5    0.57    0.06
   7   3   5    0.49    0.05
   7   3   5    0.66    0.06
   7   3   5    0.66    0.06
  -7  -3  -5    0.67    0.05
   7   3   6    0.28    0.04
   7   3   6    0.28    0.04
   7   3   6    0.20    0.04
  -7   3  -6    0.24    0.04
  -7  -3  -6    0.24    0.03
  -7   3  -7    0.07    0.03
   7   3   7    0.05    0.02
   7   3   7    0.04    0.02
   7   3   7    0.04    0.02
  -7  -3  -7    0.13    0.03
   7   3   8   14.86    0.53
  -7   3  -8   14.57    0.51
   7   3   8   14.80    0.41
   7   3   8   14.80    0.41
  -7  -3  -8   14.99    0.51
   7   3   9    2.50    0.11
   7   3   9    2.50    0.11
   7   3   9    2.70    0.14
  -7   3  -9    2.61    0.13
  -7  -3  -9    2.49    0.11
   7  -3   9    2.55    0.10
  -7  -3  -9    2.49    0.11
   7  -3   9    2.66    0.10
   7  -3   9    2.53    0.09
  -7  -3  -9    2.65    0.11
  -7   3 -10    0.60    0.06
   7  -3  10    0.53    0.04
   7  -3  10    0.57    0.04
   7  -3  10    0.66    0.04
  -7   3 -11    0.19    0.04
   7  -3  11    0.24    0.03
   7  -3  11    0.24    0.03
   7  -3  11    0.23    0.04
   7  -3  11    0.22    0.03
  -7   3 -12    3.68    0.17
   7  -3  12    4.06    0.14
   7  -3  12    3.95    0.11
   7  -3  12    3.96    0.14
   7  -3  12    4.05    0.13
   7  -3  12    3.95    0.11
   7  -3  12    4.07    0.16
  -7   3 -13    0.79    0.06
   7  -3  13    0.95    0.05
   7  -3  13    0.96    0.05
   7  -3  13    0.96    0.04
   7  -3  13    0.97    0.06
   7  -3  13    0.92    0.05
   7  -3  13    0.96    0.04
   7  -3  14    0.05    0.01
   7  -3  14    0.00    0.01
   7  -3  14    0.03    0.01
   7  -3  14    0.02    0.02
   7  -3  14    0.03    0.01
   7  -3  14    0.04    0.02
   7  -3  15    3.92    0.12
   7  -3  15    3.75    0.10
   7  -3  15    3.82    0.12
   7  -3  15    3.72    0.12
   7  -3  15    3.75    0.10
   7  -3  15    3.79    0.13
   7  -3  16    1.98    0.08
   7  -3  16    2.15    0.07
  -7   4  16    0.05    0.01
  -7   4  16    0.08    0.01
  -7   4  16    0.05    0.01
   7  -4 -16    0.03    0.01
  -7   4  15    0.33    0.03
  -7   4  15    0.31    0.03
  -7   4  15    0.29    0.03
  -7   4  14    0.24    0.03
  -7   4  14    0.17    0.02
  -7   4  14    0.20    0.03
  -7  -4  14    0.18    0.02
  -7   4  13    0.00    0.01
  -7   4  13    0.02    0.02
  -7   4  13    0.03    0.02
   7  -4 -13    0.02    0.02
  -7  -4  13    0.00    0.01
  -7   4  12    0.71    0.05
  -7   4  12    0.70    0.05
  -7   4  12    0.78    0.05
   7  -4 -12    0.64    0.05
  -7  -4  12    0.70    0.04
  -7   4  11    0.19    0.03
  -7   4  11    0.24    0.03
  -7   4  11    0.15    0.03
   7  -4 -11    0.16    0.03
  -7  -4  11    0.19    0.02
  -7   4  10    1.60    0.08
  -7   4  10    1.61    0.08
   7  -4 -10    1.55    0.09
  -7  -4  10    1.63    0.07
  -7   4   9    9.66    0.31
  -7   4   9   10.17    0.31
   7  -4  -9   10.85    0.36
  -7  -4   9    9.91    0.28
   7   4  -8    0.45    0.04
  -7   4   8    0.45    0.05
  -7   4   8    0.40    0.04
   7  -4  -8    0.40    0.05
  -7  -4   8    0.48    0.04
  -7   4   7    0.32    0.04
  -7   4   7    0.44    0.05
   7   4  -7    0.33    0.06
   7   4  -7    0.47    0.04
  -7  -4   7    0.45    0.04
   7  -4  -7    0.37    0.04
   7  -4  -7    0.36    0.04
   7  -4  -7    0.37    0.04
   7  -4  -7    0.46    0.05
   7   4  -6    1.48    0.10
   7   4  -6    1.32    0.10
   7  -4  -6    1.31    0.07
   7  -4  -6    1.31    0.07
   7   4  -5    1.98    0.13
   7   4  -5    1.94    0.12
   7   4  -4   17.97    0.66
   7   4  -4   18.77    0.61
   7   4  -3    0.69    0.07
   7   4  -3    0.65    0.06
   7   4  -2    0.01    0.02
   7   4  -2    0.00    0.02
  -7  -4   2    0.18    0.03
   7   4  -1    0.16    0.04
   7   4  -1    0.10    0.03
  -7  -4   1    0.20    0.03
   7   4   0    4.28    0.16
   7   4   0    4.24    0.19
   7   4   0    4.28    0.16
   7   4   0    4.26    0.21
  -7  -4   0    4.51    0.17
  -7  -4   0    4.38    0.21
   7   4   1    3.47    0.17
   7   4   1    3.27    0.13
   7   4   1    3.27    0.13
   7   4   1    3.49    0.15
  -7  -4  -1    3.31    0.14
  -7  -4  -1    2.90    0.16
   7   4   2    9.63    0.29
   7   4   2    9.55    0.34
   7   4   2    9.63    0.29
   7   4   2    9.35    0.37
  -7  -4  -2    8.84    0.37
  -7  -4  -2    9.60    0.33
   7   4   3    0.05    0.03
   7   4   3    0.09    0.03
   7   4   3    0.06    0.02
   7   4   3    0.06    0.02
  -7  -4  -3    0.06    0.02
  -7  -4  -3    0.04    0.02
   7   4   4    6.87    0.23
   7   4   4    6.94    0.29
   7   4   4    6.87    0.23
  -7  -4  -4    7.29    0.29
  -7  -4  -4    6.94    0.25
   7   4   5    0.26    0.03
   7   4   5    0.19    0.05
   7   4   5    0.19    0.04
   7   4   5    0.19    0.04
   7  -4   5    0.26    0.03
  -7  -4  -5    0.24    0.05
   7  -4   5    0.20    0.03
  -7  -4  -5    0.23    0.03
   7   4   6   10.02    0.29
   7  -4   6    9.73    0.29
   7  -4   6    9.65    0.29
  -7  -4  -6    9.95    0.34
   7   4   7    0.18    0.03
   7  -4   7    0.14    0.02
  -7  -4  -7    0.07    0.02
   7   4   8    4.51    0.15
   7  -4   8    4.72    0.15
  -7  -4  -8    4.59    0.17
   7  -4   8    4.65    0.15
   7   4   9    0.04    0.02
   7  -4   9    0.06    0.02
  -7  -4  -9    0.05    0.02
   7  -4   9    0.08    0.02
   7   4  10    0.26    0.03
  -7  -4 -10    0.23    0.03
   7  -4  10    0.24    0.03
   7  -4  10    0.23    0.03
   7   4  11    4.07    0.13
   7  -4  11    4.17    0.13
   7  -4  11    4.18    0.14
   7   4  12    0.48    0.03
   7  -4  12    0.53    0.03
   7  -4  12    0.49    0.03
   7  -4  13    0.78    0.04
   7  -4  13    0.75    0.04
   7  -4  14    3.42    0.10
   7  -4  14    3.36    0.10
  -7   5  13    1.52    0.06
   7  -5 -13    1.47    0.05
  -7   5  12    0.60    0.03
  -7   5  12    0.64    0.03
   7  -5 -12    0.59    0.03
  -7   5  11    0.16    0.02
  -7   5  11    0.14    0.02
  -7  -5  11    0.12    0.02
   7  -5 -11    0.11    0.02
  -7   5  10    0.58    0.04
  -7   5  10    0.61    0.04
   7  -5 -10    0.51    0.04
  -7  -5  10    0.60    0.03
  -7   5   9    1.24    0.06
  -7   5   9    1.27    0.06
  -7  -5   9    1.29    0.05
   7  -5  -9    1.25    0.06
  -7   5   8    0.02    0.02
  -7   5   8    0.01    0.02
  -7  -5   8    0.02    0.01
   7  -5  -8    0.03    0.02
  -7   5   7    0.65    0.05
  -7   5   7    0.60    0.04
   7  -5  -7    0.61    0.04
  -7  -5   7    0.60    0.04
   7  -5  -7    0.61    0.04
   7   5  -6    0.16    0.02
  -7   5   6    0.15    0.03
   7  -5  -6    0.15    0.03
   7  -5  -6    0.10    0.02
  -7  -5   6    0.14    0.02
  -7   5   5    0.80    0.05
   7   5  -5    0.74    0.04
   7  -5  -5    0.76    0.05
  -7  -5   5    0.85    0.04
   7  -5  -5    0.74    0.05
   7   5  -4    6.44    0.20
  -7   5   4    6.61    0.21
  -7  -5   4    6.52    0.19
   7  -5  -4    6.47    0.21
   7  -5  -4    6.61    0.21
   7   5  -3    0.31    0.03
  -7   5   3    0.25    0.03
   7  -5  -3    0.29    0.03
   7  -5  -3    0.28    0.03
  -7  -5   3    0.28    0.03
   7   5  -2    5.10    0.16
  -7   5   2    5.22    0.17
   7  -5  -2    4.94    0.16
   7  -5  -2    4.75    0.16
  -7   5   1    6.53    0.20
   7   5  -1    6.28    0.19
   7  -5  -1    6.36    0.20
   7  -5  -1    6.35    0.20
   7   5   0   25.85    0.69
   7  -5   0   25.71    0.72
   7  -5   0   26.34    0.72
   7   5   1    0.03    0.02
  -7  -5  -1    0.04    0.02
   7  -5   1    0.04    0.02
   7  -5   1    0.07    0.02
   7   5   2    1.10    0.06
  -7  -5  -2    1.11    0.06
   7  -5   2    1.12    0.06
   7  -5   2    0.98    0.06
   7   5   3    1.25    0.06
   7  -5   3    1.08    0.06
   7  -5   3    1.23    0.06
  -7  -5  -3    1.19    0.07
   7   5   4    0.42    0.04
  -7  -5  -4    0.42    0.04
   7  -5   4    0.39    0.03
   7  -5   4    0.39    0.03
   7   5   5    3.07    0.11
   7  -5   5    3.06    0.11
   7  -5   5    3.11    0.11
  -7  -5  -5    3.06    0.13
   7   5   6    0.12    0.02
   7  -5   6    0.24    0.03
  -7  -5  -6    0.10    0.02
   7  -5   6    0.17    0.02
   7   5   7    0.07    0.02
   7  -5   7    0.08    0.02
   7  -5   7    0.08    0.02
  -7  -5  -7    0.09    0.02
   7   5   8    0.19    0.02
   7  -5   8    0.11    0.02
   7  -5   8    0.17    0.02
   7   5   9    0.28    0.02
   7  -5   9    0.19    0.02
   7  -5   9    0.27    0.02
   7   5  10    0.02    0.01
   7  -5  10    0.03    0.01
   7  -5  10    0.03    0.01
   7  -5  11    0.37    0.02
   7  -6  -7    1.67    0.06
  -7  -6   6    0.42    0.02
   7  -6  -6    0.45    0.03
  -7  -6   5    0.03    0.01
   7  -6  -5    0.02    0.01
   7  -6  -4    3.05    0.10
  -7  -6   4    3.10    0.09
   7   6  -3    0.81    0.04
   7  -6  -3    0.81    0.04
  -7  -6   3    0.87    0.04
   7   6  -2    2.68    0.09
   7  -6  -2    2.85    0.09
  -7  -6   2    2.71    0.09
   7   6  -1    6.66    0.19
   7  -6  -1    6.84    0.20
  -7  -6   1    6.67    0.19
   7   6   0    0.45    0.03
   7  -6   0    0.60    0.03
  -7  -6   0    0.50    0.03
   7   6   1    2.42    0.08
   7  -6   1    2.44    0.08
  -7  -6  -1    2.53    0.08
   7   6   2    0.07    0.01
   7  -6   2    0.04    0.01
   7   6   3    0.10    0.01
   7  -6   3    0.10    0.01
   7   6   4    5.93    0.17
   7  -6   4    5.90    0.17
   7   6   5    0.94    0.04
   7  -6   5    0.91    0.04
  -8   0  20    0.10    0.01
  -8   0  20    0.08    0.01
  -8   0  20    0.10    0.01
  -8   0  20    0.10    0.01
   8   0 -20    0.11    0.01
   8   0 -20    0.11    0.01
  -8   0  20    0.10    0.01
  -8   0  20    0.10    0.01
  -8   0  19    0.00    0.01
  -8   0  19    0.02    0.01
  -8   0  19   -0.01    0.01
  -8   0  19    0.01    0.01
  -8   0  19    0.00    0.01
  -8   0  19   -0.01    0.01
  -8   0  18    7.31    0.22
  -8   0  18    6.87    0.17
  -8   0  18    7.15    0.22
   8   0 -18    7.31    0.26
  -8   0  18    6.87    0.17
  -8   0  18    6.93    0.21
  -8   0  18    6.83    0.22
  -8   0  17   -0.01    0.01
  -8   0  17    0.03    0.02
  -8   0  17    0.02    0.01
  -8   0  17    0.00    0.02
  -8   0  17   -0.01    0.02
   8   0 -17    0.03    0.02
  -8   0  17    0.02    0.01
  -8   0  16    1.44    0.06
  -8   0  16    1.44    0.06
  -8   0  16    1.23    0.07
  -8   0  16    1.27    0.07
  -8   0  16    1.29    0.07
  -8   0  16    1.40    0.07
   8   0 -16    1.28    0.07
   8   0 -16    1.29    0.08
  -8   0  16    1.28    0.07
  -8   0  15    0.07    0.03
   8   0 -15    0.02    0.02
  -8   0  15    0.00    0.02
  -8   0  15    0.01    0.01
  -8   0  15    0.01    0.01
  -8   0  15   -0.01    0.02
  -8   0  15    0.00    0.02
  -8   0  15    0.02    0.02
   8   0 -14    2.82    0.13
   8   0 -14    2.91    0.15
   8   0 -13    0.02    0.02
   8   0 -13    0.05    0.02
   8   0 -13    0.01    0.02
   8   0 -13    0.01    0.02
   8   0 -12   71.10    2.27
   8   0 -12   71.88    2.13
   8   0 -12   72.05    2.21
   8   0 -12   70.34    2.35
   8   0 -11    0.00    0.01
   8   0 -11    0.03    0.02
   8   0 -11    0.00    0.01
   8   0 -11    0.01    0.02
   8   0 -10    8.74    0.24
   8   0 -10    9.27    0.30
   8   0 -10    8.79    0.30
   8   0 -10    8.74    0.24
   8   0 -10    8.98    0.32
   8   0 -10    8.53    0.32
   8   0  -9   -0.02    0.01
   8   0  -9   -0.03    0.01
  -8   0   9   -0.02    0.02
   8   0  -9   -0.03    0.01
   8   0  -9    0.01    0.02
   8   0  -9   -0.03    0.01
   8   0  -8    0.70    0.04
  -8   0   8    0.64    0.04
   8   0  -8    0.66    0.03
   8   0  -8    0.66    0.05
   8   0  -8    0.69    0.05
   8   0  -8    0.66    0.03
   8   0  -7    0.05    0.02
   8   0  -7    0.00    0.01
  -8   0   7   -0.01    0.01
   8   0  -7    0.00    0.01
   8   0  -7    0.00    0.01
   8   0  -6    0.81    0.04
   8   0  -6    0.75    0.04
   8   0  -6    0.81    0.04
   8   0  -6    0.83    0.05
  -8   0   6    0.79    0.04
   8   0  -5    0.01    0.01
  -8   0   5   -0.01    0.01
   8   0  -5    0.00    0.01
   8   0  -5    0.01    0.01
   8   0  -4    0.01    0.01
   8   0  -4    0.01    0.01
   8   0  -4    0.02    0.02
   8   0  -3    0.00    0.01
   8   0  -3    0.00    0.01
  -8   0   1    0.01    0.01
   8   0  -1   -0.01    0.01
   8   0  -1    0.00    0.02
   8   0  -1   -0.01    0.01
   8   0   0   37.03    0.88
  -8   0   0   36.36    1.21
   8   0   0   37.03    0.88
   8   0   0   37.55    1.86
   8   0   1    0.17    0.02
   8   0   1    0.17    0.02
   8   0   1    0.17    0.04
   8   0   2   38.54    2.00
  -8   0  -2   39.81    1.30
   8   0   2   40.12    0.94
   8   0   2   40.12    0.94
  -8   0  -3   -0.01    0.01
  -8   0  -4   32.34    1.06
  -8   0  -5    0.04    0.01
  -8   0  -6    2.47    0.10
  -8   0  -7    0.04    0.01
  -8   0  -8   27.80    0.92
  -8   0  -9    0.00    0.01
  -8   0 -10   11.50    0.40
  -8   0 -11    0.04    0.02
  -8   0 -12    0.03    0.02
   8   0  13   -0.01    0.02
   8   0  13    0.03    0.02
   8   0  13   -0.02    0.01
   8   0  13   -0.02    0.01
   8   0  14    3.33    0.14
   8   0  14    3.47    0.10
   8   0  14    3.47    0.10
   8   0  14    3.37    0.13
   8   0  14    3.27    0.12
   8   0  15    0.00    0.01
   8   0  15    0.00    0.02
   8   0  15    0.00    0.01
   8   0  15   -0.01    0.02
   8   0  15    0.00    0.02
   8   0  16    0.42    0.04
   8   0  16    0.40    0.03
   8   0  16    0.40    0.03
   8   0  16    0.38    0.03
   8   0  17    0.00    0.01
   8   0  17    0.00    0.01
   8   0  17    0.00    0.01
  -8   1  20    1.26    0.05
   8   1 -20    1.23    0.04
  -8   1  20    1.29    0.05
  -8   1  20    1.27    0.05
   8   1 -20    1.23    0.04
  -8   1  20    1.24    0.05
   8   1 -20    1.32    0.05
  -8  -1  20    1.27    0.05
  -8  -1  20    1.24    0.05
  -8  -1  20    1.33    0.04
  -8  -1  20    1.33    0.04
  -8   1  19    0.57    0.04
  -8   1  19    0.67    0.04
  -8   1  19    0.56    0.04
  -8   1  19    0.64    0.03
  -8   1  19    0.64    0.03
   8   1 -19    0.62    0.04
  -8   1  19    0.63    0.04
  -8  -1  19    0.56    0.03
   8  -1 -19    0.63    0.03
  -8  -1  19    0.56    0.03
  -8  -1  19    0.64    0.04
  -8  -1  19    0.58    0.03
   8  -1 -19    0.63    0.03
  -8  -1  19    0.63    0.04
  -8   1  18    1.60    0.07
  -8   1  18    1.47    0.07
  -8   1  18    1.53    0.05
  -8   1  18    1.48    0.07
   8   1 -18    1.49    0.07
  -8   1  18    1.50    0.07
  -8   1  18    1.53    0.05
  -8  -1  18    1.44    0.05
  -8  -1  18    1.44    0.05
  -8  -1  18    1.30    0.06
  -8  -1  18    1.46    0.06
  -8  -1  18    1.47    0.06
  -8  -1  18    1.59    0.08
  -8   1  17    1.44    0.05
  -8   1  17    1.30    0.07
  -8   1  17    1.38    0.07
  -8   1  17    1.44    0.05
   8   1 -17    1.30    0.07
  -8   1  17    1.34    0.07
  -8   1  17    1.31    0.07
  -8  -1  17    1.32    0.07
  -8  -1  17    1.46    0.06
  -8  -1  17    1.46    0.06
   8  -1 -17    1.44    0.08
  -8  -1  17    1.41    0.07
  -8  -1  17    1.39    0.06
  -8   1  16   10.04    0.30
  -8   1  16    9.44    0.23
  -8   1  16    9.44    0.23
  -8   1  16    9.97    0.30
  -8   1  16    9.85    0.29
  -8   1  16    9.61    0.30
  -8  -1  16    9.82    0.24
  -8  -1  16    9.94    0.30
  -8  -1  16    9.95    0.33
   8  -1 -16    9.88    0.35
  -8  -1  16    9.93    0.28
  -8  -1  16    9.82    0.24
  -8   1  15    0.44    0.05
  -8   1  15    0.46    0.05
   8   1 -15    0.46    0.05
  -8   1  15    0.40    0.04
  -8   1  15    0.33    0.04
  -8   1  15    0.39    0.03
  -8   1  15    0.39    0.03
  -8  -1  15    0.41    0.03
  -8  -1  15    0.40    0.04
   8  -1 -15    0.49    0.05
  -8  -1  15    0.44    0.05
  -8  -1  15    0.41    0.03
   8   1 -14    1.06    0.08
  -8   1  14    1.08    0.08
  -8   1  14    1.02    0.07
   8   1 -14    1.18    0.08
   8   1 -14    1.03    0.09
  -8   1  14    1.41    0.08
   8  -1 -14    1.23    0.08
   8  -1 -14    1.16    0.07
   8  -1 -14    1.05    0.08
   8  -1 -14    1.19    0.08
  -8   1  13   19.19    0.62
   8   1 -13   20.45    0.64
   8   1 -13   19.69    0.67
   8  -1 -13   18.27    0.67
   8  -1 -13   19.05    0.63
   8  -1 -13   19.44    0.62
   8  -1 -13   19.35    0.66
   8   1 -12   10.44    0.40
   8   1 -12   10.82    0.38
   8   1 -12   10.54    0.37
  -8   1  12   10.96    0.37
   8  -1 -12   10.93    0.39
   8  -1 -12   10.52    0.29
   8  -1 -12   11.07    0.36
   8  -1 -12   10.79    0.39
   8  -1 -12   10.52    0.29
   8  -1 -12   10.96    0.37
   8   1 -11    3.84    0.16
   8   1 -11    4.08    0.16
   8   1 -11    3.91    0.17
  -8   1  11    3.76    0.15
   8  -1 -11    3.84    0.13
   8  -1 -11    3.74    0.17
   8  -1 -11    3.79    0.15
   8  -1 -11    3.88    0.15
   8  -1 -11    3.84    0.13
   8  -1 -11    3.93    0.16
   8   1 -10    4.74    0.18
  -8   1  10    4.43    0.17
   8   1 -10    4.52    0.19
   8   1 -10    4.57    0.18
   8  -1 -10    4.41    0.18
   8  -1 -10    4.59    0.18
   8  -1 -10    4.48    0.17
   8  -1 -10    4.54    0.17
   8  -1 -10    4.64    0.14
   8  -1 -10    4.64    0.14
  -8   1   9    7.79    0.26
   8   1  -9    7.59    0.29
   8   1  -9    7.68    0.27
   8  -1  -9    8.00    0.21
   8  -1  -9    7.85    0.29
   8  -1  -9    8.00    0.21
   8  -1  -9    7.55    0.27
   8  -1  -9    7.91    0.28
  -8   1   8   45.84    1.39
   8   1  -8   47.98    1.49
   8   1  -8   45.88    1.40
   8   1  -8   45.58    1.12
   8   1  -8   45.58    1.12
   8  -1  -8   46.23    1.54
   8  -1  -8   48.07    1.48
   8  -1  -8   47.68    1.12
   8  -1  -8   47.68    1.12
  -8   1   7    2.15    0.09
   8   1  -7    2.17    0.07
   8   1  -7    2.17    0.07
   8   1  -7    2.12    0.09
   8   1  -7    1.97    0.10
   8  -1  -7    2.04    0.09
   8  -1  -7    2.03    0.07
   8  -1  -7    2.03    0.07
   8  -1  -7    2.04    0.09
   8   1  -6   23.80    0.76
   8   1  -6   23.59    0.57
   8   1  -6   23.58    0.71
   8   1  -6   23.59    0.57
  -8   1   6   22.87    0.70
   8  -1  -6   22.54    0.75
   8  -1  -6   22.89    0.57
   8  -1  -6   22.89    0.57
   8   1  -5    9.73    0.26
   8   1  -5   10.31    0.33
   8   1  -5   10.34    0.35
   8   1  -5    9.73    0.26
   8  -1  -5   10.63    0.26
   8  -1  -5   10.36    0.34
   8  -1  -5   10.63    0.26
   8   1  -4    0.42    0.03
   8   1  -4    0.45    0.04
   8   1  -4    0.42    0.03
   8   1  -4    0.44    0.03
   8  -1  -4    0.47    0.03
  -8  -1   4    0.47    0.04
   8  -1  -4    0.47    0.03
   8  -1  -4    0.50    0.03
   8   1  -3   13.46    0.34
   8   1  -3   13.92    0.45
   8   1  -3   13.46    0.34
  -8  -1   3   13.76    0.47
   8  -1  -3   13.20    0.33
   8  -1  -3   13.20    0.33
   8   1  -2    1.09    0.06
   8   1  -2    1.07    0.05
   8   1  -2    1.07    0.05
   8  -1  -2    1.04    0.04
  -8  -1   2    0.96    0.06
   8  -1  -2    1.04    0.04
   8  -1  -2    1.09    0.09
   8   1  -1   19.34    0.62
   8   1  -1   19.09    0.47
   8   1  -1   19.09    0.47
  -8   1   1   19.03    0.64
   8  -1  -1   19.23    0.46
   8  -1  -1   19.23    0.46
   8  -1  -1   18.23    0.96
  -8  -1   1   18.39    0.64
   8   1   0    0.12    0.02
   8   1   0    0.12    0.02
  -8   1   0    0.03    0.01
   8   1   0    0.07    0.02
   8  -1   0    0.05    0.01
  -8  -1   0    0.03    0.01
   8  -1   0    0.05    0.01
   8  -1   0    0.03    0.02
   8   1   1   13.52    0.46
   8   1   1   14.59    0.36
  -8   1  -1   14.10    0.48
   8   1   1   14.59    0.36
  -8  -1  -1   13.32    0.47
   8   1   2   24.31    0.60
   8   1   2   23.91    0.78
   8   1   2   24.31    0.60
  -8   1  -2   25.61    0.81
  -8  -1  -2   23.67    0.80
   8   1   3    0.19    0.02
   8   1   3    0.19    0.02
  -8   1  -3    0.11    0.02
   8   1   3    0.13    0.03
  -8  -1  -3    0.13    0.01
   8   1   4    7.76    0.21
  -8   1  -4    7.80    0.28
   8   1   4    7.76    0.21
  -8  -1  -4    7.60    0.26
   8   1   5   11.08    0.30
  -8   1  -5   11.62    0.39
   8   1   5   11.08    0.30
  -8  -1  -5   11.06    0.37
  -8   1  -6   10.13    0.36
  -8  -1  -6   10.09    0.33
  -8   1  -7    0.68    0.05
  -8   1  -7    0.64    0.05
  -8   1  -8    0.33    0.03
  -8   1  -8    0.36    0.03
  -8   1  -9    0.87    0.05
  -8   1  -9    0.79    0.06
  -8   1 -10    5.57    0.22
  -8   1 -10    5.68    0.21
  -8   1 -11    0.89    0.06
  -8   1 -11    1.03    0.06
  -8   1 -12    3.00    0.13
   8  -1  12    2.89    0.11
   8  -1  12    2.83    0.09
   8  -1  12    2.87    0.13
   8  -1  12    2.87    0.12
   8  -1  12    2.83    0.09
  -8   1 -13    0.26    0.04
   8  -1  13    0.29    0.04
   8  -1  13    0.29    0.04
   8  -1  13    0.25    0.04
   8  -1  13    0.21    0.03
   8  -1  13    0.21    0.03
  -8   1 -14    1.75    0.09
   8  -1  14    1.78    0.07
   8  -1  14    1.69    0.08
   8  -1  14    1.57    0.08
   8  -1  14    1.78    0.07
   8  -1  14    1.69    0.09
  -8   1 -15    0.19    0.03
   8  -1  15    0.20    0.03
   8  -1  15    0.22    0.03
   8  -1  15    0.17    0.02
   8  -1  15    0.27    0.03
   8  -1  15    0.17    0.02
   8  -1  16    1.40    0.05
   8  -1  16    1.40    0.05
   8  -1  16    1.46    0.06
   8  -1  16    1.58    0.07
   8  -1  16    1.50    0.07
   8  -1  17    0.01    0.01
   8  -1  17    0.01    0.01
   8  -1  17    0.01    0.01
   8  -1  17    0.01    0.01
   8  -1  17   -0.01    0.01
  -8   2  19    0.10    0.02
  -8   2  19    0.13    0.02
  -8   2  19    0.13    0.02
   8   2 -19    0.15    0.02
  -8   2  19    0.08    0.01
   8   2 -19    0.12    0.01
   8   2 -19    0.12    0.01
  -8  -2  19    0.15    0.01
  -8  -2  19    0.14    0.02
  -8  -2  19    0.14    0.02
  -8  -2  19    0.15    0.01
  -8   2  18    0.01    0.01
  -8   2  18    0.02    0.01
  -8   2  18    0.02    0.01
  -8   2  18    0.04    0.02
   8   2 -18    0.01    0.01
  -8  -2  18    0.02    0.01
  -8  -2  18    0.02    0.01
  -8  -2  18    0.01    0.01
  -8  -2  18    0.01    0.01
  -8   2  17    0.11    0.02
  -8   2  17    0.11    0.02
   8   2 -17    0.13    0.02
  -8   2  17    0.10    0.02
  -8   2  17    0.09    0.02
  -8  -2  17    0.11    0.02
  -8  -2  17    0.08    0.02
  -8  -2  17    0.11    0.02
   8  -2 -17    0.09    0.02
  -8  -2  17    0.08    0.02
  -8   2  16    0.33    0.04
   8   2 -16    0.42    0.04
  -8   2  16    0.36    0.04
  -8   2  16    0.34    0.04
  -8   2  16    0.37    0.04
  -8  -2  16    0.29    0.04
  -8  -2  16    0.34    0.03
  -8  -2  16    0.35    0.03
   8  -2 -16    0.28    0.04
  -8  -2  16    0.34    0.03
  -8   2  15    0.39    0.04
  -8   2  15    0.33    0.04
  -8   2  15    0.40    0.04
  -8   2  15    0.30    0.04
   8  -2 -15    0.30    0.04
  -8  -2  15    0.36    0.03
  -8  -2  15    0.36    0.03
  -8  -2  15    0.39    0.04
  -8  -2  15    0.34    0.03
  -8   2  14    0.00    0.02
  -8   2  14    0.01    0.02
  -8   2  14    0.02    0.02
  -8   2  14    0.04    0.02
  -8  -2  14    0.00    0.02
  -8  -2  14   -0.01    0.02
   8  -2 -14    0.15    0.03
  -8   2  13    5.05    0.17
  -8   2  13    4.88    0.17
  -8   2  13    4.86    0.17
  -8   2  13    4.76    0.16
  -8   2  13    4.99    0.20
   8   2 -13    4.54    0.22
   8   2 -13    4.61    0.21
  -8  -2  13    4.95    0.19
   8  -2 -13    4.84    0.16
   8  -2 -13    5.15    0.21
   8  -2 -13    4.84    0.16
   8  -2 -13    4.68    0.19
  -8  -2  13    4.88    0.16
  -8   2  12    9.32    0.33
   8   2 -12    9.42    0.35
   8   2 -12    9.71    0.37
   8  -2 -12    9.71    0.35
   8  -2 -12    9.86    0.34
   8  -2 -12    9.18    0.27
   8  -2 -12    9.18    0.27
   8  -2 -12    9.55    0.35
   8   2 -11    7.33    0.28
  -8   2  11    6.93    0.26
   8   2 -11    7.06    0.29
   8  -2 -11    7.16    0.21
   8  -2 -11    7.12    0.27
   8  -2 -11    7.24    0.26
   8  -2 -11    7.00    0.27
   8  -2 -11    7.16    0.21
  -8   2  10    0.01    0.02
   8   2 -10   -0.01    0.02
   8   2 -10    0.04    0.03
   8  -2 -10    0.03    0.02
   8  -2 -10    0.03    0.02
   8  -2 -10    0.01    0.01
   8  -2 -10    0.05    0.02
   8  -2 -10    0.01    0.01
  -8   2   9    0.05    0.02
   8   2  -9    0.09    0.03
  -8   2   9    0.20    0.03
   8   2  -9    0.08    0.03
   8  -2  -9    0.24    0.04
   8  -2  -9    0.11    0.02
   8  -2  -9    0.10    0.02
   8  -2  -9    0.09    0.02
   8  -2  -9    0.11    0.02
   8   2  -8   18.75    0.60
  -8   2   8   18.89    0.62
   8   2  -8   18.96    0.64
  -8   2   8   18.38    0.58
   8  -2  -8   18.73    0.62
   8  -2  -8   18.68    0.60
   8  -2  -8   18.37    0.47
   8  -2  -8   18.37    0.47
   8  -2  -8   18.85    0.64
   8   2  -7   35.83    1.08
   8   2  -7   35.22    1.16
  -8   2   7   33.97    1.06
  -8   2   7   35.09    1.13
   8  -2  -7   36.05    1.18
   8  -2  -7   35.53    0.86
   8  -2  -7   36.14    1.11
   8  -2  -7   35.21    1.13
   8  -2  -7   35.53    0.86
   8   2  -6   13.75    0.37
  -8   2   6   14.04    0.47
   8   2  -6   14.34    0.46
   8   2  -6   14.51    0.50
   8   2  -6   13.75    0.37
   8  -2  -6   14.09    0.47
   8  -2  -6   14.40    0.36
   8  -2  -6   14.40    0.36
  -8   2   5   13.55    0.43
   8   2  -5   12.81    0.45
   8   2  -5   13.35    0.34
   8   2  -5   13.35    0.34
   8   2  -5   12.27    0.42
   8  -2  -5   12.54    0.33
   8  -2  -5   12.54    0.33
   8   2  -4   10.82    0.29
   8   2  -4   10.62    0.36
   8   2  -4   10.90    0.39
   8   2  -4   10.82    0.29
   8  -2  -4   11.38    0.28
   8  -2  -4   11.38    0.28
   8   2  -3    0.85    0.05
   8   2  -3    0.85    0.05
   8   2  -3    0.71    0.05
   8   2  -3    0.80    0.06
   8  -2  -3    0.77    0.04
  -8  -2   3    0.70    0.06
   8  -2  -3    0.77    0.04
   8   2  -2    1.73    0.08
   8   2  -2    1.66    0.09
   8   2  -2    1.69    0.07
   8   2  -2    1.69    0.07
   8  -2  -2    1.70    0.06
   8  -2  -2    1.70    0.06
  -8  -2   2    1.69    0.09
   8   2  -1    0.20    0.03
   8   2  -1    0.20    0.03
   8   2  -1    0.20    0.03
   8   2  -1    0.18    0.03
  -8  -2   1    0.27    0.04
   8   2   0    8.51    0.23
   8   2   0    8.51    0.23
   8   2   0    8.03    0.30
  -8  -2   0    8.15    0.30
   8   2   1   18.36    0.47
   8   2   1   17.73    0.61
   8   2   1   18.36    0.47
  -8  -2  -1   18.44    0.62
  -8   2  -2   20.49    0.74
   8   2   2   21.99    0.55
   8   2   2   21.87    0.72
   8   2   2   21.99    0.55
  -8  -2  -2   22.24    0.73
   8   2   3   19.60    0.66
   8   2   3   20.17    0.51
   8   2   3   20.17    0.51
  -8   2  -3   20.68    0.69
  -8  -2  -3   18.91    0.67
   8   2   4    0.05    0.02
  -8   2  -4    0.08    0.02
   8   2   4    0.05    0.02
   8   2   4    0.11    0.03
  -8  -2  -4    0.09    0.02
   8   2   5    0.00    0.01
   8   2   5    0.03    0.02
   8   2   5    0.03    0.02
  -8   2  -5    0.00    0.02
  -8   2  -5    0.00    0.01
  -8  -2  -5    0.12    0.02
   8   2   6    4.91    0.20
   8   2   6    4.86    0.16
  -8   2  -6    5.25    0.21
   8   2   6    4.86    0.16
  -8   2  -6    5.09    0.19
  -8  -2  -6    5.04    0.18
   8   2   7    0.40    0.04
  -8   2  -7    0.44    0.05
   8   2   7    0.40    0.04
  -8   2  -7    0.45    0.04
  -8  -2  -7    0.39    0.03
  -8   2  -8    2.58    0.12
  -8   2  -8    2.50    0.13
  -8   2  -9    3.65    0.17
  -8   2  -9    3.42    0.15
  -8   2 -10    0.27    0.04
  -8   2 -10    0.26    0.04
  -8   2 -11   24.24    0.78
   8  -2  11   24.12    0.53
   8  -2  11   23.54    0.68
   8  -2  11   23.29    0.67
   8  -2  11   24.12    0.53
   8  -2  11   24.07    0.74
  -8   2 -12    0.09    0.03
   8  -2  12    0.10    0.03
   8  -2  12    0.09    0.03
   8  -2  12    0.13    0.02
   8  -2  12    0.25    0.03
   8  -2  12    0.13    0.02
  -8   2 -13    4.66    0.19
   8  -2  13    4.84    0.18
   8  -2  13    4.93    0.13
   8  -2  13    4.93    0.13
   8  -2  13    4.80    0.17
   8  -2  13    4.75    0.15
   8  -2  13    4.98    0.16
  -8   2 -14    4.87    0.19
   8  -2  14    5.03    0.17
   8  -2  14    4.81    0.16
   8  -2  14    4.89    0.13
   8  -2  14    4.89    0.13
   8  -2  14    5.05    0.18
   8  -2  14    5.16    0.16
   8  -2  15    0.21    0.02
   8  -2  15    0.23    0.03
   8  -2  15    0.19    0.03
   8  -2  15    0.20    0.03
   8  -2  15    0.21    0.02
   8  -2  16    0.02    0.01
   8  -2  16    0.01    0.01
   8  -2  16    0.02    0.01
   8  -2  16    0.01    0.01
   8  -2  16    0.02    0.01
   8  -2  17    5.84    0.17
   8  -2  17    5.67    0.13
   8  -2  17    5.59    0.17
   8  -2  17    5.67    0.13
   8  -2  17    5.49    0.18
  -8   3  18    0.49    0.03
   8   3 -18    0.51    0.03
  -8   3  18    0.49    0.03
  -8   3  18    0.49    0.03
  -8   3  17    0.01    0.01
  -8   3  17    0.01    0.01
  -8   3  17    0.03    0.01
   8   3 -17    0.04    0.01
  -8   3  17    0.05    0.01
  -8  -3  17    0.02    0.01
   8  -3 -17    0.01    0.01
  -8  -3  17    0.00    0.01
  -8   3  16    3.63    0.13
  -8   3  16    3.67    0.13
  -8   3  16    3.59    0.12
  -8   3  16    3.64    0.12
   8   3 -16    3.57    0.13
  -8  -3  16    3.57    0.13
   8  -3 -16    3.57    0.12
  -8  -3  16    3.71    0.11
  -8   3  15    0.76    0.05
  -8   3  15    0.81    0.05
  -8   3  15    0.89    0.05
  -8   3  15    0.91    0.05
   8   3 -15    0.82    0.05
  -8  -3  15    0.80    0.04
   8  -3 -15    0.74    0.06
  -8  -3  15    0.79    0.05
  -8   3  14    0.88    0.05
   8   3 -14    0.90    0.06
  -8   3  14    0.79    0.05
  -8   3  14    0.79    0.05
  -8   3  14    0.89    0.05
  -8  -3  14    0.81    0.06
   8  -3 -14    0.90    0.06
  -8  -3  14    0.87    0.05
   8   3 -13    2.29    0.10
  -8   3  13    2.14    0.10
  -8   3  13    2.28    0.10
  -8   3  13    2.45    0.10
  -8   3  13    2.30    0.10
  -8  -3  13    2.25    0.09
   8  -3 -13    2.18    0.11
  -8  -3  13    2.34    0.11
  -8   3  12    0.72    0.05
  -8   3  12    0.72    0.05
   8   3 -12    0.62    0.05
  -8   3  12    0.65    0.05
  -8   3  12    0.81    0.05
  -8  -3  12    0.66    0.04
   8  -3 -12    0.73    0.06
  -8  -3  12    0.69    0.05
  -8   3  11    1.01    0.06
  -8   3  11    1.04    0.06
   8   3 -11    1.05    0.09
  -8   3  11    1.00    0.06
  -8   3  11    1.02    0.06
  -8   3  11    1.12    0.07
   8  -3 -11    0.96    0.08
   8  -3 -11    1.21    0.08
   8  -3 -11    1.09    0.07
  -8  -3  11    1.05    0.05
   8  -3 -11    1.13    0.06
   8  -3 -11    1.13    0.06
   8   3 -10    0.03    0.03
  -8   3  10    0.06    0.03
   8   3 -10    0.09    0.04
  -8   3  10    0.04    0.02
   8  -3 -10    0.06    0.02
   8  -3 -10    0.11    0.03
   8  -3 -10    0.09    0.03
   8  -3 -10    0.06    0.02
  -8   3   9    0.03    0.02
   8   3  -9    0.04    0.03
   8   3  -9    0.02    0.02
  -8   3   9    0.03    0.02
   8  -3  -9    0.03    0.02
   8  -3  -9    0.03    0.02
   8  -3  -9    0.02    0.02
   8  -3  -9    0.02    0.02
   8   3  -8    0.17    0.04
   8   3  -8    0.22    0.05
   8  -3  -8    0.23    0.03
   8  -3  -8    0.17    0.03
   8  -3  -8    0.23    0.03
   8   3  -7    3.83    0.19
   8   3  -7    3.57    0.17
   8  -3  -7    3.88    0.13
   8  -3  -7    3.88    0.13
   8  -3  -7    3.43    0.15
   8   3  -6    5.40    0.24
   8   3  -6    5.67    0.22
   8  -3  -6    5.69    0.17
   8  -3  -6    5.69    0.17
   8  -3  -6    5.62    0.21
   8   3  -5    2.76    0.13
   8   3  -5    2.62    0.15
   8  -3  -5    2.82    0.10
   8  -3  -5    2.82    0.10
   8   3  -4    2.33    0.12
   8   3  -4    2.43    0.13
   8  -3  -4    2.35    0.09
   8  -3  -4    2.35    0.09
   8   3  -3    4.32    0.17
   8   3  -3    4.24    0.14
   8   3  -3    4.24    0.19
   8   3  -3    4.24    0.14
  -8  -3   3    4.20    0.16
   8   3  -2    1.78    0.08
   8   3  -2    1.74    0.09
   8   3  -2    1.78    0.08
   8   3  -2    2.00    0.11
  -8  -3   2    1.88    0.08
  -8  -3   2    1.82    0.11
   8   3  -1    1.53    0.10
   8   3  -1    1.63    0.08
   8   3  -1    1.66    0.09
   8   3  -1    1.63    0.08
  -8  -3   1    1.65    0.10
  -8  -3   1    1.54    0.07
   8   3   0    3.97    0.18
   8   3   0    3.84    0.14
   8   3   0    3.84    0.14
   8   3   0    3.94    0.16
  -8  -3   0    4.14    0.18
  -8  -3   0    4.04    0.15
   8   3   1    0.31    0.05
   8   3   1    0.35    0.04
   8   3   1    0.35    0.04
   8   3   1    0.25    0.04
  -8  -3  -1    0.30    0.03
  -8  -3  -1    0.38    0.05
   8   3   2    2.41    0.10
   8   3   2    2.41    0.10
   8   3   2    2.46    0.13
  -8  -3  -2    2.48    0.10
  -8  -3  -2    2.48    0.12
   8   3   3    3.12    0.12
   8   3   3    3.12    0.12
   8   3   3    3.07    0.15
  -8  -3  -3    2.99    0.12
  -8  -3  -3    3.03    0.14
   8   3   4    0.80    0.06
   8   3   4    0.80    0.07
   8   3   4    0.80    0.06
  -8  -3  -4    0.84    0.06
   8   3   5    4.39    0.16
   8   3   5    4.45    0.20
   8   3   5    4.39    0.16
  -8  -3  -5    4.33    0.18
   8   3   6    0.13    0.03
   8   3   6    0.14    0.04
   8   3   6    0.13    0.03
  -8   3  -6    0.18    0.04
  -8  -3  -6    0.18    0.03
  -8   3  -7    2.94    0.14
   8   3   7    2.74    0.12
   8   3   7    2.74    0.12
  -8  -3  -7    2.89    0.13
  -8   3  -8    1.32    0.08
   8   3   8    1.15    0.09
   8   3   8    1.18    0.07
   8   3   8    1.18    0.07
  -8  -3  -8    1.17    0.07
  -8   3  -9    0.86    0.07
   8  -3   9    0.74    0.05
   8  -3   9    0.76    0.05
   8  -3   9    0.89    0.05
  -8   3 -10    1.73    0.10
   8  -3  10    1.60    0.08
   8  -3  10    1.61    0.07
   8  -3  10    1.69    0.07
  -8   3 -11    3.04    0.14
   8  -3  11    2.95    0.10
   8  -3  11    2.81    0.09
   8  -3  11    2.81    0.09
   8  -3  11    3.05    0.13
   8  -3  11    2.93    0.11
   8  -3  11    2.86    0.11
  -8   3 -12    0.84    0.06
   8  -3  12    0.85    0.05
   8  -3  12    0.79    0.06
   8  -3  12    0.83    0.05
   8  -3  12    0.84    0.04
   8  -3  12    0.84    0.04
   8  -3  12    0.83    0.05
   8  -3  13    0.10    0.02
   8  -3  13    0.12    0.02
   8  -3  13    0.12    0.02
   8  -3  13    0.11    0.02
   8  -3  13    0.10    0.02
   8  -3  13    0.12    0.02
   8  -3  14    4.81    0.14
   8  -3  14    4.56    0.16
   8  -3  14    4.67    0.12
   8  -3  14    4.67    0.12
   8  -3  14    4.56    0.15
   8  -3  14    4.70    0.15
   8  -3  15    0.91    0.05
   8  -3  15    0.96    0.04
   8  -3  15    0.85    0.04
   8  -3  15    0.88    0.04
   8  -3  15    0.86    0.03
   8  -3  15    0.86    0.03
  -8   4  16    0.42    0.03
  -8   4  16    0.36    0.02
   8  -4 -16    0.37    0.02
  -8   4  15    1.34    0.06
  -8   4  15    1.25    0.06
  -8   4  15    1.26    0.05
   8  -4 -15    1.23    0.05
  -8  -4  15    1.30    0.05
  -8   4  14    0.14    0.02
  -8   4  14    0.14    0.02
  -8   4  14    0.14    0.02
  -8  -4  14    0.12    0.02
  -8   4  13    0.75    0.05
  -8   4  13    0.83    0.05
  -8   4  13    0.81    0.05
  -8  -4  13    0.80    0.04
  -8   4  12    4.08    0.14
  -8   4  12    4.17    0.15
  -8   4  12    4.18    0.15
   8  -4 -12    4.14    0.17
  -8  -4  12    4.18    0.13
  -8   4  11    6.97    0.22
  -8   4  11    6.92    0.22
  -8  -4  11    6.69    0.20
   8  -4 -11    6.94    0.26
  -8   4  10    0.20    0.03
  -8   4  10    0.28    0.04
  -8  -4  10    0.28    0.03
   8  -4 -10    0.15    0.03
  -8   4   9    2.04    0.09
  -8   4   9    2.01    0.09
   8  -4  -9    1.76    0.11
  -8  -4   9    1.93    0.08
   8   4  -8   11.53    0.32
  -8   4   8   11.11    0.35
  -8   4   8   11.45    0.35
   8  -4  -8   11.83    0.35
  -8  -4   8   11.54    0.32
   8   4  -7    7.81    0.23
  -8   4   7    8.06    0.26
  -8   4   7    7.79    0.25
  -8  -4   7    8.16    0.23
   8  -4  -7    8.20    0.25
   8   4  -6    0.09    0.04
   8   4  -6    0.12    0.02
   8   4  -6    0.09    0.04
   8  -4  -6    0.08    0.02
  -8  -4   6    0.16    0.03
   8   4  -5    0.44    0.06
   8   4  -5    0.50    0.08
   8   4  -4    0.01    0.03
   8   4  -4    0.04    0.03
   8   4  -3   11.73    0.41
   8   4  -3   11.77    0.45
   8   4  -2    0.77    0.08
   8   4  -2    0.86    0.07
  -8  -4   2    0.82    0.06
   8   4  -1   14.33    0.40
   8   4  -1   14.06    0.53
   8   4  -1   14.33    0.40
   8   4  -1   14.08    0.48
  -8  -4   1   14.31    0.47
   8   4   0    1.50    0.08
   8   4   0    1.50    0.08
   8   4   0    1.44    0.09
   8   4   0    1.53    0.11
  -8  -4   0    1.63    0.08
  -8  -4   0    1.45    0.10
   8   4   1    1.77    0.09
   8   4   1    1.75    0.12
   8   4   1    1.77    0.09
   8   4   1    1.79    0.10
  -8  -4  -1    1.57    0.11
  -8  -4  -1    1.70    0.09
   8   4   2    3.29    0.14
   8   4   2    3.27    0.17
   8   4   2    3.29    0.14
  -8  -4  -2    3.50    0.14
  -8  -4  -2    3.19    0.17
   8   4   3    0.69    0.07
   8   4   3    0.69    0.07
   8   4   3    0.48    0.07
  -8  -4  -3    0.78    0.05
  -8  -4  -3    0.58    0.06
   8   4   4    0.08    0.03
   8   4   4    0.07    0.03
   8   4   4    0.06    0.02
   8   4   4    0.08    0.03
   8  -4   4    0.06    0.02
  -8  -4  -4    0.06    0.02
  -8  -4  -4    0.06    0.03
   8  -4   4    0.09    0.02
   8   4   5    1.24    0.06
  -8  -4  -5    1.38    0.07
   8  -4   5    1.17    0.06
   8  -4   5    1.21    0.06
   8   4   6    0.05    0.02
   8  -4   6    0.08    0.02
  -8  -4  -6    0.08    0.02
   8  -4   6    0.08    0.02
   8   4   7    3.83    0.13
   8  -4   7    3.53    0.12
   8  -4   7    3.66    0.13
  -8  -4  -7    3.81    0.15
   8   4   8    0.01    0.01
   8  -4   8    0.04    0.02
   8  -4   8    0.05    0.02
  -8  -4  -8    0.02    0.02
   8   4   9    0.37    0.03
  -8  -4  -9    0.33    0.03
   8  -4   9    0.31    0.03
   8  -4   9    0.27    0.03
   8   4  10    2.08    0.08
  -8  -4 -10    2.16    0.09
   8  -4  10    2.02    0.08
   8  -4  10    2.03    0.08
   8  -4  11    5.17    0.16
   8  -4  11    5.26    0.16
   8  -4  12    3.85    0.12
   8  -4  12    3.73    0.12
   8  -4  13    4.35    0.13
   8  -4  13    4.33    0.13
  -8   5  13    1.25    0.05
   8  -5 -13    1.29    0.05
  -8   5  12    4.46    0.14
   8  -5 -12    4.58    0.14
   8  -5 -12    4.58    0.14
  -8  -5  12    4.29    0.13
  -8   5  11    0.52    0.03
  -8   5  11    0.51    0.03
  -8  -5  11    0.51    0.03
   8  -5 -11    0.55    0.03
  -8   5  10    0.13    0.02
  -8   5  10    0.17    0.02
   8  -5 -10    0.12    0.02
  -8  -5  10    0.15    0.02
  -8   5   9    0.77    0.05
  -8   5   9    0.70    0.04
  -8  -5   9    0.77    0.04
   8  -5  -9    0.72    0.04
  -8   5   8    3.13    0.11
  -8   5   8    3.11    0.11
   8  -5  -8    3.05    0.11
  -8  -5   8    3.10    0.10
   8  -5  -8    3.15    0.11
  -8   5   7    1.75    0.08
   8  -5  -7    1.81    0.08
   8  -5  -7    1.85    0.08
  -8  -5   7    1.85    0.07
  -8   5   6    0.04    0.02
   8   5  -6    0.02    0.02
   8  -5  -6    0.01    0.02
   8  -5  -6    0.05    0.02
  -8  -5   6    0.05    0.02
  -8   5   5    3.78    0.13
   8   5  -5    3.76    0.12
  -8  -5   5    3.85    0.12
   8  -5  -5    3.89    0.13
   8  -5  -5    3.66    0.13
  -8   5   4    4.21    0.14
   8   5  -4    4.03    0.13
   8  -5  -4    4.14    0.14
  -8  -5   4    4.11    0.13
   8  -5  -4    3.93    0.14
   8   5  -3    0.70    0.04
  -8   5   3    0.64    0.04
   8  -5  -3    0.67    0.04
  -8  -5   3    0.80    0.04
   8  -5  -3    0.69    0.04
  -8   5   2    6.48    0.20
   8   5  -2    6.53    0.19
   8  -5  -2    6.27    0.20
   8  -5  -2    6.32    0.20
   8   5  -1   12.35    0.35
   8  -5  -1   12.45    0.36
   8  -5  -1   12.38    0.36
   8   5   0    0.19    0.03
   8  -5   0    0.23    0.03
   8  -5   0    0.23    0.03
   8   5   1    0.08    0.02
   8  -5   1    0.09    0.02
   8  -5   1    0.09    0.02
  -8  -5  -1    0.08    0.02
   8   5   2    0.73    0.05
   8  -5   2    0.77    0.05
  -8  -5  -2    0.72    0.05
   8  -5   2    0.73    0.04
   8   5   3    7.49    0.22
   8  -5   3    7.26    0.22
   8  -5   3    7.22    0.22
  -8  -5  -3    7.10    0.26
   8   5   4    1.86    0.07
   8  -5   4    1.80    0.07
   8  -5   4    1.91    0.08
  -8  -5  -4    1.83    0.09
   8   5   5    4.38    0.14
  -8  -5  -5    4.39    0.17
   8  -5   5    4.40    0.14
   8  -5   5    4.40    0.14
   8   5   6    0.04    0.01
   8  -5   6    0.05    0.01
  -8  -5  -6    0.06    0.02
   8  -5   6    0.06    0.02
   8   5   7    1.56    0.06
   8  -5   7    1.45    0.06
   8  -5   7    1.60    0.06
   8   5   8    2.15    0.07
   8  -5   8    2.09    0.07
   8  -5   8    2.11    0.08
   8   5   9    2.11    0.07
   8  -5   9    2.16    0.07
   8  -5   9    2.18    0.07
   8   5  10    0.58    0.03
   8  -5  10    0.60    0.03
   8  -5  10    0.58    0.03
   8  -6  -7    2.93    0.09
  -8  -6   6    0.56    0.03
   8  -6  -6    0.61    0.03
   8  -6  -5    0.39    0.03
  -8  -6   5    0.41    0.02
  -8  -6   4    0.24    0.02
   8  -6  -4    0.24    0.02
   8   6  -3    1.44    0.05
   8  -6  -3    1.40    0.05
  -8  -6   3    1.44    0.05
   8   6  -2    0.53    0.03
   8  -6  -2    0.56    0.03
  -8  -6   2    0.54    0.03
   8   6  -1    9.95    0.27
   8  -6  -1   10.18    0.28
  -8  -6   1    9.90    0.27
   8   6   0    0.64    0.03
  -8  -6   0    0.69    0.03
   8  -6   0    0.71    0.03
   8   6   1    3.66    0.11
   8  -6   1    3.67    0.11
  -8  -6  -1    3.59    0.11
   8   6   2    3.23    0.10
   8  -6   2    2.98    0.10
  -8  -6  -2    3.27    0.10
   8   6   3    0.38    0.02
  -8  -6  -3    0.37    0.02
   8  -6   3    0.36    0.02
   8   6   4    0.52    0.03
   8  -6   4    0.44    0.02
  -9   0  20    0.80    0.04
  -9   0  20    0.77    0.03
  -9   0  20    0.86    0.04
  -9   0  20    0.77    0.03
  -9   0  19    0.00    0.01
  -9   0  19    0.01    0.01
  -9   0  19    0.01    0.01
  -9   0  19    0.03    0.01
  -9   0  19    0.01    0.01
  -9   0  19   -0.01    0.01
  -9   0  18    0.62    0.04
  -9   0  18    0.63    0.04
  -9   0  18    0.56    0.04
  -9   0  18    0.63    0.03
  -9   0  18    0.63    0.03
  -9   0  18    0.60    0.04
   9   0 -17    0.02    0.02
  -9   0  17   -0.01    0.02
  -9   0  17    0.01    0.01
  -9   0  17    0.01    0.02
  -9   0  17   -0.01    0.02
  -9   0  17    0.01    0.01
  -9   0  17    0.04    0.02
   9   0 -16    3.20    0.14
  -9   0  16    3.00    0.09
  -9   0  16    2.94    0.11
  -9   0  16    2.97    0.13
   9   0 -16    3.06    0.12
  -9   0  16    3.01    0.12
  -9   0  16    3.00    0.09
  -9   0  15    0.01    0.01
   9   0 -15    0.03    0.02
  -9   0  15    0.01    0.02
  -9   0  15   -0.01    0.02
  -9   0  15    0.01    0.02
   9   0 -15    0.06    0.02
  -9   0  15    0.01    0.01
   9   0 -14   18.05    0.59
   9   0 -14   17.70    0.63
   9   0 -14   18.59    0.60
   9   0 -13    0.01    0.02
   9   0 -13    0.00    0.02
   9   0 -13    0.01    0.02
   9   0 -12    6.53    0.24
   9   0 -12    6.69    0.26
   9   0 -12    6.11    0.24
   9   0 -11    0.01    0.01
   9   0 -11    0.01    0.02
   9   0 -11    0.01    0.01
   9   0 -11    0.00    0.01
   9   0 -11    0.01    0.02
   9   0 -10    0.18    0.03
   9   0 -10    0.19    0.02
   9   0 -10    0.19    0.02
   9   0 -10    0.20    0.03
   9   0 -10    0.26    0.04
   9   0  -9    0.01    0.01
   9   0  -9    0.00    0.01
   9   0  -9    0.01    0.01
   9   0  -9    0.01    0.01
   9   0  -8    0.81    0.04
   9   0  -8    0.81    0.04
   9   0  -8    0.85    0.06
   9   0  -8    0.95    0.05
   9   0  -7   -0.05    0.01
   9   0  -7   -0.05    0.01
   9   0  -7   -0.05    0.01
   9   0  -6   19.37    0.62
   9   0  -6   18.90    0.47
   9   0  -6   18.90    0.47
   9   0  -5   -0.01    0.01
   9   0  -5    0.05    0.02
   9   0  -5   -0.01    0.01
   9   0  -4  107.14    3.17
   9   0  -4   98.14    2.39
   9   0  -4   98.14    2.39
   9   0  -3    0.01    0.01
  -9   0   3    0.02    0.01
   9   0  -3    0.03    0.01
   9   0  -3    0.01    0.01
  -9   0   2    0.13    0.02
   9   0  -2    0.16    0.02
   9   0  -2    0.16    0.02
  -9   0   1    0.01    0.01
   9   0  -1    0.02    0.01
   9   0  -1    0.02    0.02
   9   0  -1    0.02    0.01
   9   0   0    1.95    0.06
  -9   0   0    1.84    0.08
   9   0   0    1.95    0.06
   9   0   0    1.93    0.13
  -9   0  -1    0.01    0.01
   9   0   1    0.03    0.02
   9   0   1    0.04    0.01
   9   0   1    0.04    0.01
  -9   0  -2   18.97    0.68
   9   0   2   21.21    0.50
   9   0   2   19.98    1.05
   9   0   2   21.21    0.50
  -9   0  -3   -0.01    0.01
  -9   0  -4   34.18    1.12
  -9   0  -5    0.01    0.01
  -9   0  -6  101.53    3.32
  -9   0  -7    0.02    0.01
  -9   0  -8    6.11    0.22
  -9   0  -9    0.00    0.01
  -9   0 -10    0.45    0.04
  -9   0 -11    0.00    0.01
   9   0  12    0.16    0.02
   9   0  12    0.17    0.03
   9   0  12    0.15    0.03
   9   0  12    0.16    0.02
   9   0  13    0.01    0.01
   9   0  13    0.00    0.02
   9   0  13   -0.02    0.02
   9   0  13    0.01    0.01
   9   0  14    2.49    0.11
   9   0  14    2.14    0.09
   9   0  14    2.13    0.07
   9   0  14    2.13    0.07
   9   0  15    0.01    0.02
   9   0  15    0.02    0.01
   9   0  15    0.02    0.01
   9   0  15    0.02    0.02
   9   0  16    4.55    0.12
   9   0  16    4.55    0.12
   9   0  16    4.55    0.15
   9   0  17   -0.01    0.01
   9   0  17    0.00    0.01
   9   0  17   -0.01    0.01
  -9   1  20    0.43    0.03
   9   1 -20    0.44    0.02
   9   1 -20    0.44    0.02
  -9   1  20    0.40    0.03
  -9   1  20    0.44    0.03
  -9  -1  20    0.47    0.02
  -9  -1  20    0.48    0.03
  -9  -1  20    0.47    0.02
  -9   1  19    0.20    0.02
  -9   1  19    0.13    0.02
  -9   1  19    0.20    0.02
   9   1 -19    0.18    0.02
  -9   1  19    0.14    0.02
  -9   1  19    0.14    0.02
  -9   1  19    0.16    0.02
  -9  -1  19    0.16    0.02
  -9  -1  19    0.12    0.02
   9  -1 -19    0.15    0.02
   9  -1 -19    0.15    0.02
  -9  -1  19    0.15    0.02
  -9  -1  19    0.15    0.02
  -9   1  18    0.02    0.01
  -9   1  18    0.01    0.01
   9   1 -18    0.01    0.01
  -9   1  18    0.01    0.01
  -9   1  18    0.01    0.01
  -9   1  18    0.01    0.01
  -9   1  18   -0.01    0.01
   9  -1 -18    0.03    0.01
  -9  -1  18   -0.01    0.01
  -9  -1  18   -0.01    0.01
  -9  -1  18   -0.01    0.01
   9  -1 -18    0.03    0.01
  -9  -1  18   -0.02    0.01
  -9   1  17    0.16    0.03
  -9   1  17    0.17    0.02
  -9   1  17    0.21    0.03
  -9   1  17    0.16    0.03
  -9   1  17    0.17    0.02
  -9   1  17    0.17    0.03
   9   1 -17    0.15    0.03
  -9  -1  17    0.18    0.03
   9  -1 -17    0.20    0.03
  -9  -1  17    0.14    0.03
  -9  -1  17    0.22    0.02
  -9  -1  17    0.22    0.02
  -9   1  16    2.65    0.11
  -9   1  16    2.67    0.11
  -9   1  16    2.68    0.10
  -9   1  16    2.69    0.08
  -9   1  16    2.73    0.11
  -9   1  16    2.69    0.08
   9   1 -16    2.69    0.12
  -9  -1  16    2.69    0.12
   9  -1 -16    2.80    0.13
  -9  -1  16    2.64    0.10
  -9  -1  16    2.76    0.09
  -9  -1  16    2.76    0.09
  -9   1  15    0.74    0.05
  -9   1  15    0.73    0.05
  -9   1  15    0.89    0.06
  -9   1  15    0.72    0.04
  -9   1  15    0.77    0.05
   9   1 -15    0.78    0.06
  -9   1  15    0.72    0.04
  -9  -1  15    0.76    0.05
  -9  -1  15    0.80    0.04
  -9  -1  15    0.67    0.05
   9  -1 -15    0.67    0.06
  -9  -1  15    0.80    0.04
  -9   1  14    6.96    0.18
   9   1 -14    6.57    0.27
  -9   1  14    6.91    0.23
  -9   1  14    7.16    0.23
  -9   1  14    7.33    0.23
  -9   1  14    6.96    0.18
   9   1 -14    6.77    0.29
  -9   1  14    6.64    0.21
  -9  -1  14    7.13    0.18
   9  -1 -14    7.13    0.26
  -9  -1  14    6.79    0.25
  -9  -1  14    6.96    0.21
  -9  -1  14    7.13    0.18
   9  -1 -14    6.88    0.28
   9  -1 -14    7.19    0.26
  -9   1  13    8.49    0.30
   9   1 -13    8.66    0.34
   9   1 -13    8.59    0.32
   9  -1 -13    9.27    0.33
   9  -1 -13    8.59    0.31
   9  -1 -13    8.01    0.24
   9  -1 -13    8.01    0.24
   9  -1 -13    8.64    0.33
   9  -1 -13    8.66    0.30
   9   1 -12    0.97    0.08
  -9   1  12    0.98    0.07
   9   1 -12    1.03    0.07
   9  -1 -12    0.87    0.06
   9  -1 -12    1.03    0.05
   9  -1 -12    0.95    0.06
   9  -1 -12    0.96    0.07
   9  -1 -12    0.86    0.06
   9  -1 -12    1.03    0.05
   9   1 -11    5.86    0.24
   9   1 -11    5.63    0.22
  -9   1  11    5.40    0.21
   9  -1 -11    5.66    0.21
   9  -1 -11    5.85    0.17
   9  -1 -11    5.85    0.17
   9  -1 -11    5.55    0.22
   9  -1 -11    5.21    0.22
   9  -1 -11    5.56    0.21
  -9   1  10   -0.01    0.01
   9   1 -10    0.03    0.02
   9   1 -10    0.02    0.02
   9  -1 -10    0.01    0.02
   9  -1 -10    0.02    0.01
   9  -1 -10    0.01    0.01
   9  -1 -10    0.02    0.01
   9  -1 -10    0.02    0.01
   9  -1 -10    0.02    0.02
   9   1  -9    2.59    0.11
   9   1  -9    2.61    0.13
  -9   1   9    2.59    0.11
   9  -1  -9    2.57    0.11
   9  -1  -9    2.45    0.10
   9  -1  -9    2.62    0.09
   9  -1  -9    2.62    0.09
   9  -1  -9    2.66    0.12
   9  -1  -9    2.33    0.11
   9   1  -8   24.62    0.60
   9   1  -8   22.58    0.75
   9   1  -8   24.44    0.81
   9   1  -8   24.62    0.60
  -9   1   8   24.81    0.75
   9  -1  -8   24.88    0.60
   9  -1  -8   24.88    0.60
   9  -1  -8   25.42    0.80
   9   1  -7    5.59    0.16
   9   1  -7    5.17    0.19
   9   1  -7    5.59    0.16
   9   1  -7    5.33    0.21
   9  -1  -7    5.61    0.16
   9  -1  -7    5.61    0.16
   9  -1  -7    5.47    0.20
   9   1  -6   25.77    0.62
   9   1  -6   25.77    0.62
   9   1  -6   25.67    0.83
   9   1  -6   24.47    0.77
   9  -1  -6   25.22    0.62
   9  -1  -6   25.89    0.82
   9  -1  -6   25.22    0.62
   9   1  -5   23.69    0.57
   9   1  -5   23.69    0.57
   9   1  -5   23.13    0.76
   9  -1  -5   23.09    0.57
   9  -1  -5   23.06    0.74
   9  -1  -5   23.09    0.57
   9   1  -4    3.07    0.09
   9   1  -4    2.83    0.12
   9   1  -4    3.07    0.09
  -9  -1   4    2.72    0.13
   9  -1  -4    2.89    0.09
   9  -1  -4    2.89    0.09
   9   1  -2   18.66    0.62
   9   1  -2   19.12    0.47
   9   1  -2   19.12    0.47
  -9  -1   2   19.11    0.64
   9  -1  -2   18.88    0.46
   9  -1  -2   18.88    0.46
   9   1  -1   24.20    0.59
   9   1  -1   24.02    0.78
  -9   1   1   22.93    0.80
   9   1  -1   24.20    0.59
  -9  -1   1   24.23    0.80
   9  -1  -1   23.31    1.22
   9  -1  -1   24.53    0.58
   9  -1  -1   24.53    0.58
   9   1   0   76.21    1.84
   9   1   0   76.21    1.84
   9   1   0   76.60    2.44
  -9   1   0   85.23    2.54
   9  -1   0   77.15    1.83
   9  -1   0   77.15    1.83
  -9  -1   0   79.56    2.54
   9  -1   0   74.28    3.86
   9   1   1   19.76    0.47
   9   1   1   19.76    0.47
  -9   1  -1   18.26    0.64
   9   1   1   18.25    0.61
  -9  -1  -1   18.38    0.63
   9   1   2   58.16    1.37
  -9   1  -2   55.42    1.88
   9   1   2   58.16    1.37
  -9  -1  -2   57.99    1.87
  -9   1  -3   58.52    1.87
   9   1   3   55.90    1.36
   9   1   3   55.90    1.36
  -9  -1  -3   57.63    1.86
   9   1   4    0.07    0.02
  -9   1  -4    0.07    0.02
   9   1   4    0.07    0.02
  -9  -1  -4    0.05    0.01
   9   1   5    3.37    0.11
   9   1   5    3.37    0.11
  -9   1  -5    3.35    0.14
  -9  -1  -5    3.42    0.12
  -9   1  -6    1.86    0.09
  -9  -1  -6    1.74    0.07
  -9   1  -7    2.56    0.11
  -9   1  -7    2.36    0.10
  -9  -1  -7    2.37    0.09
  -9   1  -8    0.04    0.02
  -9   1  -8    0.07    0.02
  -9   1  -9    0.05    0.02
  -9   1  -9    0.06    0.02
  -9   1 -10    2.99    0.14
  -9   1 -10    3.11    0.13
  -9   1 -11    1.11    0.07
  -9   1 -11    1.04    0.06
  -9   1 -12    0.76    0.06
   9  -1  12    0.81    0.04
   9  -1  12    0.77    0.06
   9  -1  12    0.81    0.04
   9  -1  12    0.79    0.05
   9  -1  12    0.87    0.05
  -9   1 -13    0.17    0.03
   9  -1  13    0.15    0.03
   9  -1  13    0.26    0.03
   9  -1  13    0.18    0.02
   9  -1  13    0.18    0.03
   9  -1  13    0.18    0.02
  -9   1 -14    2.49    0.12
   9  -1  14    2.71    0.10
   9  -1  14    2.62    0.12
   9  -1  14    2.57    0.10
   9  -1  14    2.70    0.09
   9  -1  14    2.70    0.09
  -9   1 -15    0.14    0.03
   9  -1  15    0.12    0.02
   9  -1  15    0.17    0.02
   9  -1  15    0.17    0.02
   9  -1  15    0.16    0.03
   9  -1  15    0.16    0.02
   9  -1  16    0.84    0.05
   9  -1  16    0.85    0.04
   9  -1  16    0.91    0.04
   9  -1  16    0.91    0.04
   9  -1  16    0.86    0.05
   9  -1  17    1.28    0.04
   9  -1  17    1.27    0.05
   9  -1  17    1.23    0.06
   9  -1  17    1.28    0.04
   9  -1  17    1.33    0.05
  -9   2  19    0.49    0.03
  -9   2  19    0.60    0.03
   9   2 -19    0.61    0.03
  -9   2  19    0.60    0.03
  -9   2  19    0.58    0.03
  -9  -2  19    0.52    0.03
   9  -2 -19    0.55    0.03
  -9  -2  19    0.56    0.03
  -9   2  18    1.73    0.07
  -9   2  18    1.70    0.07
  -9   2  18    1.71    0.07
   9   2 -18    1.66    0.07
  -9   2  18    1.76    0.07
  -9  -2  18    1.67    0.08
  -9  -2  18    1.74    0.06
  -9  -2  18    1.67    0.05
  -9  -2  18    1.67    0.05
  -9   2  17    0.03    0.02
  -9   2  17    0.01    0.02
   9   2 -17    0.01    0.02
  -9   2  17    0.00    0.01
  -9   2  17    0.01    0.02
  -9  -2  17    0.05    0.02
  -9  -2  17    0.00    0.02
  -9  -2  17    0.00    0.01
  -9  -2  17    0.00    0.01
  -9   2  16    0.03    0.02
  -9   2  16    0.00    0.02
  -9   2  16    0.00    0.01
   9   2 -16    0.03    0.02
  -9   2  16    0.05    0.02
  -9  -2  16    0.02    0.01
  -9  -2  16    0.01    0.02
  -9  -2  16    0.03    0.01
  -9  -2  16    0.02    0.01
   9  -2 -16    0.02    0.02
  -9   2  15    0.77    0.05
   9   2 -15    0.82    0.06
  -9   2  15    0.71    0.05
  -9   2  15    0.80    0.05
  -9   2  15    0.83    0.06
   9  -2 -15    0.88    0.06
  -9  -2  15    0.68    0.06
  -9  -2  15    0.84    0.05
  -9   2  14    1.51    0.07
  -9   2  14    1.49    0.07
  -9   2  14    1.40    0.07
  -9   2  14    1.34    0.07
   9   2 -14    1.31    0.08
  -9  -2  14    1.37    0.08
   9  -2 -14    1.40    0.08
  -9  -2  14    1.49    0.07
  -9   2  13   12.01    0.35
  -9   2  13   11.50    0.34
  -9   2  13   12.05    0.35
   9   2 -13   10.29    0.46
  -9   2  13   11.46    0.35
  -9  -2  13   11.77    0.38
  -9  -2  13   11.53    0.33
   9  -2 -13   12.22    0.41
   9   2 -12    0.45    0.07
   9   2 -12    0.34    0.06
  -9   2  12    0.32    0.05
   9  -2 -12    0.25    0.04
   9  -2 -12    0.29    0.04
   9  -2 -12    0.29    0.04
   9  -2 -12    0.32    0.04
   9  -2 -12    0.27    0.05
   9  -2 -12    0.29    0.04
   9   2 -11    4.48    0.20
  -9   2  11    4.51    0.18
   9   2 -11    4.92    0.22
   9  -2 -11    4.54    0.18
   9  -2 -11    4.58    0.15
   9  -2 -11    4.58    0.15
   9  -2 -11    4.41    0.19
   9  -2 -11    4.58    0.19
   9   2 -10    0.60    0.06
   9   2 -10    0.55    0.07
  -9   2  10    0.56    0.05
   9  -2 -10    0.60    0.04
   9  -2 -10    0.58    0.05
   9  -2 -10    0.56    0.05
   9  -2 -10    0.61    0.05
   9  -2 -10    0.60    0.04
   9   2  -9    2.68    0.14
   9   2  -9    2.81    0.13
   9  -2  -9    2.74    0.10
   9  -2  -9    2.82    0.12
   9  -2  -9    2.65    0.13
   9  -2  -9    2.74    0.10
   9   2  -8    0.28    0.05
   9   2  -8    0.14    0.03
   9  -2  -8    0.08    0.02
   9  -2  -8    0.08    0.02
   9  -2  -8    0.15    0.03
   9  -2  -8    0.12    0.03
   9   2  -7   32.86    1.04
   9   2  -7   34.53    1.11
   9  -2  -7   33.74    0.83
   9  -2  -7   33.74    0.83
   9  -2  -7   34.90    1.07
   9  -2  -7   33.72    1.09
   9   2  -6   33.83    0.81
   9   2  -6   33.23    1.08
   9   2  -6   32.58    1.01
   9   2  -6   33.83    0.81
   9  -2  -6   32.03    0.80
   9  -2  -6   32.03    0.80
   9   2  -5    2.23    0.10
   9   2  -5    2.13    0.12
   9   2  -5    2.29    0.09
   9   2  -5    2.29    0.09
   9  -2  -5    2.35    0.08
   9  -2  -5    2.35    0.08
   9   2  -4    2.49    0.09
   9   2  -4    2.38    0.11
   9   2  -4    2.49    0.09
   9   2  -4    2.53    0.12
   9  -2  -4    2.40    0.08
   9  -2  -4    2.40    0.08
   9   2  -3    1.93    0.11
   9   2  -3    2.03    0.08
   9   2  -3    2.03    0.08
   9  -2  -3    2.31    0.07
  -9  -2   3    2.07    0.11
   9  -2  -3    2.31    0.07
   9   2  -2   87.39    2.07
   9   2  -2   91.28    2.74
   9   2  -2   87.39    2.07
   9  -2  -2   85.81    2.05
   9  -2  -2   85.81    2.05
  -9  -2   2   84.72    2.85
   9   2  -1    0.29    0.04
   9   2  -1    0.17    0.03
   9   2  -1    0.17    0.03
  -9  -2   1    0.23    0.04
   9   2   0    0.69    0.04
   9   2   0    0.69    0.04
   9   2   0    0.65    0.05
  -9  -2   0    0.77    0.05
   9   2   1    3.00    0.11
   9   2   1    2.81    0.13
   9   2   1    3.00    0.11
  -9  -2  -1    3.01    0.13
   9   2   2   27.76    0.90
   9   2   2   27.37    0.69
  -9   2  -2   27.28    0.93
   9   2   2   27.37    0.69
  -9  -2  -2   27.48    0.92
   9   2   3    3.43    0.12
  -9   2  -3    2.89    0.14
   9   2   3    3.43    0.12
  -9   2  -3    3.37    0.15
   9   2   3    3.34    0.15
  -9  -2  -3    3.57    0.14
   9   2   4   59.81    1.43
   9   2   4   59.81    1.43
  -9   2  -4   57.09    1.95
   9   2   4   58.91    1.88
  -9   2  -4   60.10    1.83
  -9  -2  -4   58.69    1.93
   9   2   5    5.84    0.18
  -9   2  -5    5.20    0.22
   9   2   5    5.39    0.22
  -9   2  -5    5.45    0.21
   9   2   5    5.84    0.18
  -9  -2  -5    5.59    0.20
  -9   2  -6    1.51    0.08
   9   2   6    1.45    0.07
  -9   2  -6    1.57    0.09
   9   2   6    1.45    0.07
  -9  -2  -6    1.56    0.07
  -9   2  -7    3.57    0.15
  -9   2  -7    3.29    0.16
  -9  -2  -7    3.32    0.13
  -9   2  -8    1.90    0.10
  -9   2  -8    1.73    0.10
  -9   2  -9    0.05    0.02
  -9   2  -9    0.01    0.02
  -9   2 -10    5.98    0.25
  -9   2 -10    5.97    0.23
   9  -2  10    6.32    0.16
   9  -2  10    6.32    0.16
   9  -2  10    5.74    0.20
   9  -2  10    5.52    0.22
   9  -2  10    6.01    0.19
  -9   2 -11    0.33    0.04
   9  -2  11    0.27    0.03
   9  -2  11    0.22    0.04
   9  -2  11    0.25    0.03
   9  -2  11    0.29    0.04
   9  -2  11    0.27    0.03
  -9   2 -12    1.50    0.09
   9  -2  12    1.40    0.07
   9  -2  12    1.54    0.09
   9  -2  12    1.49    0.07
   9  -2  12    1.46    0.06
   9  -2  12    1.46    0.06
  -9   2 -13    0.04    0.02
   9  -2  13    0.06    0.03
   9  -2  13    0.05    0.02
   9  -2  13    0.05    0.02
   9  -2  13    0.05    0.02
   9  -2  13    0.08    0.02
  -9   2 -14    5.45    0.21
   9  -2  14    5.72    0.20
   9  -2  14    5.83    0.19
   9  -2  14    5.80    0.15
   9  -2  14    5.80    0.15
   9  -2  14    5.68    0.18
   9  -2  15    0.25    0.03
   9  -2  15    0.33    0.03
   9  -2  15    0.26    0.03
   9  -2  15    0.27    0.03
   9  -2  15    0.33    0.03
   9  -2  16    0.10    0.02
   9  -2  16    0.05    0.02
   9  -2  16    0.08    0.01
   9  -2  16    0.08    0.02
   9  -2  16    0.08    0.01
   9   3 -18    0.04    0.01
  -9   3  18    0.04    0.01
  -9   3  18    0.04    0.01
  -9   3  17    6.95    0.20
  -9   3  17    6.82    0.19
  -9   3  17    6.66    0.20
  -9   3  17    7.13    0.20
   9   3 -17    6.79    0.22
   9  -3 -17    6.73    0.20
  -9  -3  17    6.59    0.19
  -9  -3  17    6.64    0.22
  -9   3  16    0.05    0.02
  -9   3  16    0.04    0.02
  -9   3  16    0.04    0.02
  -9   3  16    0.04    0.02
   9   3 -16    0.02    0.01
  -9  -3  16    0.03    0.01
  -9  -3  16    0.03    0.02
   9  -3 -16    0.03    0.01
  -9   3  15    0.44    0.04
  -9   3  15    0.45    0.04
  -9   3  15    0.43    0.04
   9   3 -15    0.43    0.04
  -9   3  15    0.44    0.04
  -9  -3  15    0.48    0.04
   9  -3 -15    0.42    0.04
   9  -3 -15    0.31    0.04
  -9  -3  15    0.44    0.03
   9   3 -14    0.33    0.04
  -9   3  14    0.39    0.04
  -9   3  14    0.34    0.04
  -9   3  14    0.31    0.04
  -9   3  14    0.40    0.04
  -9  -3  14    0.32    0.03
   9  -3 -14    0.39    0.04
  -9  -3  14    0.44    0.05
   9  -3 -14    0.31    0.04
  -9   3  13    0.01    0.02
  -9   3  13    0.02    0.02
   9   3 -13    0.01    0.02
  -9   3  13    0.02    0.02
  -9   3  13    0.01    0.02
  -9  -3  13    0.01    0.02
  -9  -3  13    0.01    0.01
   9  -3 -13    0.02    0.02
   9   3 -12    0.12    0.03
  -9   3  12    0.12    0.03
  -9   3  12    0.08    0.02
  -9   3  12    0.11    0.03
  -9   3  12    0.10    0.03
  -9  -3  12    0.08    0.03
   9  -3 -12    0.05    0.02
  -9  -3  12    0.11    0.02
  -9   3  11    1.33    0.07
  -9   3  11    1.43    0.07
  -9   3  11    1.34    0.07
   9  -3 -11    1.35    0.08
  -9  -3  11    1.35    0.06
   9   3 -10    2.93    0.17
   9  -3 -10    2.95    0.11
   9  -3 -10    3.36    0.14
   9  -3 -10    2.95    0.11
   9   3  -9    0.39    0.06
   9   3  -9    0.25    0.05
   9  -3  -9    0.19    0.03
   9  -3  -9    0.34    0.04
   9  -3  -9    0.34    0.04
   9   3  -8    3.95    0.18
   9   3  -8    3.82    0.19
   9  -3  -8    3.96    0.13
   9  -3  -8    3.45    0.16
   9  -3  -8    3.96    0.13
   9   3  -7    1.90    0.12
   9   3  -7    2.00    0.11
   9  -3  -7    2.00    0.08
   9  -3  -7    2.00    0.08
   9  -3  -7    1.85    0.10
   9   3  -6    8.69    0.33
   9   3  -6    9.29    0.37
   9  -3  -6    9.83    0.26
   9  -3  -6    9.83    0.26
   9   3  -5    6.31    0.24
   9   3  -5    6.18    0.26
   9  -3  -5    6.05    0.18
   9  -3  -5    6.05    0.18
   9   3  -4    6.92    0.21
   9   3  -4    6.87    0.28
   9   3  -4    6.92    0.21
   9   3  -4    6.71    0.25
   9  -3  -4    6.40    0.19
   9  -3  -4    6.40    0.19
  -9  -3   4    6.71    0.23
   9   3  -3    0.01    0.01
   9   3  -3    0.03    0.02
   9   3  -3    0.00    0.02
   9   3  -3    0.01    0.01
  -9  -3   3    0.03    0.01
   9   3  -2    0.93    0.06
   9   3  -2    0.83    0.06
   9   3  -2    0.88    0.07
   9   3  -2    0.93    0.06
  -9  -3   2    0.90    0.05
  -9  -3   2    1.06    0.08
   9   3  -1    0.12    0.03
   9   3  -1    0.06    0.03
   9   3  -1    0.12    0.03
  -9  -3   1    0.07    0.03
  -9  -3   1    0.10    0.02
   9   3   0   21.39    0.56
   9   3   0   20.95    0.73
   9   3   0   21.39    0.56
  -9  -3   0   21.54    0.68
  -9  -3   0   21.91    0.75
   9   3   1    5.69    0.24
   9   3   1    5.64    0.19
   9   3   1    5.64    0.19
  -9  -3  -1    5.64    0.20
  -9  -3  -1    5.64    0.24
   9   3   2    0.88    0.06
   9   3   2    0.88    0.06
   9   3   2    0.99    0.08
  -9  -3  -2    0.99    0.06
  -9  -3  -2    1.19    0.08
   9   3   3   14.44    0.40
   9   3   3   14.44    0.40
   9   3   3   14.42    0.52
  -9  -3  -3   14.56    0.52
  -9  -3  -3   14.46    0.47
   9   3   4    1.86    0.11
   9   3   4    1.81    0.09
   9   3   4    1.81    0.09
  -9  -3  -4    1.78    0.10
  -9  -3  -4    1.76    0.08
   9   3   5    0.97    0.07
  -9   3  -5    0.95    0.07
   9   3   5    0.97    0.07
  -9  -3  -5    1.09    0.07
   9   3   6    3.89    0.15
   9   3   6    3.76    0.18
   9   3   6    3.89    0.15
  -9   3  -6    4.20    0.18
  -9  -3  -6    4.23    0.17
   9   3   7    0.08    0.03
  -9   3  -7    0.03    0.02
   9   3   7    0.08    0.03
   9   3   7    0.02    0.02
  -9  -3  -7    0.02    0.01
  -9   3  -8    0.19    0.04
   9  -3   8    0.21    0.03
   9  -3   8    0.18    0.03
   9  -3   8    0.17    0.03
  -9  -3  -8    0.23    0.03
  -9   3  -9    1.00    0.07
   9  -3   9    0.85    0.06
   9  -3   9    0.99    0.05
   9  -3   9    1.04    0.06
  -9   3 -10   30.59    0.98
   9  -3  10   30.85    0.66
   9  -3  10   29.57    0.83
   9  -3  10   29.01    0.91
   9  -3  10   29.84    0.84
   9  -3  10   30.18    0.82
   9  -3  10   30.85    0.66
  -9   3 -11    2.35    0.12
   9  -3  11    2.75    0.08
   9  -3  11    2.70    0.10
   9  -3  11    2.38    0.11
   9  -3  11    2.52    0.09
   9  -3  11    2.75    0.08
   9  -3  11    2.52    0.10
  -9   3 -12    0.15    0.03
   9  -3  12    0.18    0.02
   9  -3  12    0.10    0.02
   9  -3  12    0.11    0.02
   9  -3  12    0.18    0.02
   9  -3  12    0.11    0.02
   9  -3  12    0.12    0.03
   9  -3  13    0.20    0.02
   9  -3  13    0.20    0.03
   9  -3  13    0.21    0.03
   9  -3  13    0.24    0.02
   9  -3  13    0.24    0.02
   9  -3  13    0.23    0.03
   9  -3  14    2.66    0.09
   9  -3  14    2.60    0.09
   9  -3  14    2.54    0.07
   9  -3  14    2.51    0.10
   9  -3  14    2.54    0.07
   9  -3  15    0.05    0.01
   9  -3  15    0.03    0.01
   9  -3  15    0.03    0.01
  -9   4  16    2.30    0.08
   9  -4 -16    2.23    0.08
  -9   4  15    5.78    0.18
  -9   4  15    5.75    0.17
  -9   4  15    6.09    0.18
   9  -4 -15    6.24    0.18
  -9  -4  15    5.71    0.16
  -9   4  14    1.83    0.07
  -9   4  14    1.86    0.07
  -9   4  14    1.85    0.07
   9  -4 -14    1.75    0.07
  -9  -4  14    1.85    0.07
  -9   4  13    2.82    0.10
  -9   4  13    2.73    0.10
  -9  -4  13    2.82    0.09
  -9   4  12    3.65    0.13
  -9   4  12    3.80    0.14
  -9  -4  12    3.84    0.12
  -9   4  11    0.23    0.03
  -9   4  11    0.15    0.03
  -9  -4  11    0.14    0.02
  -9   4  10    2.00    0.09
  -9   4  10    2.15    0.09
  -9  -4  10    2.14    0.08
  -9   4   9    2.67    0.11
  -9   4   9    2.67    0.11
  -9  -4   9    2.67    0.10
   9  -4  -9    2.66    0.11
  -9   4   8    0.39    0.04
  -9   4   8    0.28    0.04
  -9  -4   8    0.40    0.04
   9  -4  -8    0.39    0.04
   9   4  -7    0.87    0.05
  -9   4   7    0.82    0.05
  -9   4   7    0.83    0.06
  -9  -4   7    0.86    0.05
   9  -4  -7    0.87    0.06
  -9   4   6    1.86    0.09
   9   4  -6    1.69    0.12
   9   4  -6    1.58    0.12
  -9   4   6    1.84    0.08
   9   4  -6    1.87    0.08
   9  -4  -6    1.93    0.08
  -9  -4   6    1.78    0.07
   9   4  -5    0.02    0.03
   9   4  -5    0.03    0.03
   9   4  -4    8.21    0.35
   9   4  -4    8.79    0.32
   9   4  -3    0.11    0.04
   9   4  -3    0.10    0.04
   9   4  -2   13.51    0.48
   9   4  -2   14.21    0.53
  -9  -4   2   14.41    0.47
   9   4  -1    2.46    0.11
   9   4  -1    2.46    0.11
   9   4  -1    2.80    0.16
  -9  -4   1    2.66    0.12
   9   4   0    0.82    0.08
   9   4   0    0.80    0.06
   9   4   0    0.80    0.06
  -9  -4   0    0.79    0.08
  -9  -4   0    0.88    0.06
   9   4   1    1.97    0.13
  -9  -4  -1    1.85    0.12
  -9  -4  -1    1.99    0.09
   9   4   2    1.64    0.09
   9   4   2    1.67    0.12
   9   4   2    1.64    0.09
  -9  -4  -2    1.68    0.08
  -9  -4  -2    1.55    0.11
   9   4   3    2.96    0.13
   9   4   3    2.93    0.16
   9   4   3    2.96    0.13
   9   4   3    2.97    0.11
   9  -4   3    2.81    0.11
  -9  -4  -3    2.90    0.12
   9  -4   3    2.95    0.11
  -9  -4  -3    3.12    0.16
   9   4   4    8.51    0.25
   9  -4   4    8.33    0.25
   9  -4   4    8.35    0.26
  -9  -4  -4    8.65    0.30
   9   4   5    6.39    0.20
  -9  -4  -5    6.46    0.23
   9  -4   5    6.25    0.20
   9  -4   5    6.38    0.20
   9   4   6    1.95    0.08
   9  -4   6    1.98    0.08
  -9  -4  -6    2.02    0.09
   9  -4   6    2.07    0.08
   9   4   7    4.98    0.16
   9  -4   7    4.95    0.16
   9  -4   7    5.08    0.16
  -9  -4  -7    4.86    0.18
   9   4   8    3.80    0.13
   9  -4   8    3.93    0.13
  -9  -4  -8    3.64    0.14
   9  -4   8    3.81    0.13
   9  -4   9    0.89    0.05
   9  -4   9    0.97    0.05
  -9  -4  -9    0.84    0.05
   9  -4  10    5.19    0.16
   9  -4  10    5.09    0.16
   9  -4  11    0.00    0.01
   9  -4  11    0.01    0.01
   9  -4  12    0.01    0.01
   9  -4  12    0.02    0.01
   9  -4  13    1.31    0.05
  -9   5  12    2.40    0.08
   9  -5 -12    2.32    0.08
  -9  -5  12    2.44    0.07
   9  -5 -12    2.43    0.08
  -9   5  11    7.51    0.22
  -9   5  11    8.04    0.23
  -9  -5  11    7.49    0.21
   9  -5 -11    7.33    0.22
   9  -5 -11    7.68    0.22
  -9   5  10    0.08    0.02
  -9   5  10    0.11    0.02
  -9  -5  10    0.11    0.02
   9  -5 -10    0.13    0.02
   9  -5 -10    0.10    0.02
  -9   5   9    2.26    0.09
  -9   5   9    2.32    0.09
   9  -5  -9    2.39    0.09
   9  -5  -9    2.36    0.09
  -9  -5   9    2.31    0.08
  -9   5   8    0.24    0.03
   9  -5  -8    0.31    0.03
  -9  -5   8    0.25    0.02
   9  -5  -8    0.33    0.03
  -9   5   7    0.42    0.04
  -9  -5   7    0.30    0.03
   9  -5  -7    0.33    0.03
   9  -5  -7    0.38    0.03
   9   5  -6    0.89    0.05
  -9   5   6    0.86    0.05
   9  -5  -6    0.74    0.05
  -9  -5   6    0.86    0.04
   9  -5  -6    0.75    0.05
  -9   5   5    1.79    0.08
   9   5  -5    1.70    0.07
  -9  -5   5    1.74    0.07
   9  -5  -5    1.79    0.08
   9  -5  -5    1.76    0.08
   9   5  -4    7.87    0.23
  -9   5   4    8.18    0.24
   9  -5  -4    8.03    0.24
  -9  -5   4    8.12    0.23
   9  -5  -4    7.60    0.24
   9   5  -3    3.95    0.13
  -9   5   3    4.09    0.14
  -9  -5   3    4.15    0.13
   9  -5  -3    4.08    0.14
   9  -5  -3    4.22    0.14
  -9   5   2    0.95    0.05
   9   5  -2    1.00    0.05
   9  -5  -2    1.02    0.05
   9  -5  -2    1.04    0.06
   9   5  -1    0.27    0.03
   9  -5  -1    0.33    0.03
   9  -5  -1    0.25    0.03
   9   5   0    1.24    0.06
  -9  -5   0    1.23    0.07
   9  -5   0    1.27    0.06
   9  -5   0    1.34    0.06
   9   5   1    0.10    0.02
   9  -5   1    0.10    0.02
   9  -5   1    0.09    0.02
  -9  -5  -1    0.09    0.02
   9   5   2    1.98    0.08
   9  -5   2    2.02    0.08
  -9  -5  -2    1.95    0.09
   9  -5   2    2.13    0.08
   9   5   3    7.82    0.22
  -9  -5  -3    7.28    0.26
   9  -5   3    7.60    0.23
   9  -5   3    7.73    0.23
   9   5   4    3.94    0.13
   9  -5   4    3.95    0.13
   9  -5   4    3.77    0.13
  -9  -5  -4    3.78    0.15
   9   5   5    1.52    0.06
   9  -5   5    1.50    0.06
  -9  -5  -5    1.45    0.07
   9  -5   5    1.58    0.06
   9   5   6    1.28    0.05
   9  -5   6    1.31    0.05
   9  -5   6    1.34    0.06
   9   5   7    0.11    0.02
   9  -5   7    0.07    0.02
   9  -5   7    0.07    0.01
   9   5   8    0.44    0.03
   9  -5   8    0.51    0.03
   9  -5   8    0.48    0.03
   9   5   9    9.82    0.27
   9  -5   9    9.99    0.28
   9  -5   9   10.10    0.28
   9  -6  -6    0.70    0.03
  -9  -6   6    0.71    0.03
   9  -6  -5    2.01    0.07
  -9  -6   5    2.14    0.07
  -9  -6   4    0.23    0.02
   9  -6  -4    0.25    0.02
   9   6  -3    0.07    0.01
   9  -6  -3    0.08    0.01
  -9  -6   3    0.05    0.01
   9   6  -2    6.85    0.19
  -9  -6   2    7.02    0.19
   9  -6  -2    7.04    0.20
   9  -6  -2    6.91    0.20
   9   6  -1    0.18    0.02
   9  -6  -1    0.18    0.02
   9  -6  -1    0.15    0.02
  -9  -6   1    0.17    0.02
   9   6   0    0.21    0.02
   9  -6   0    0.18    0.02
  -9  -6   0    0.19    0.02
   9  -6   0    0.22    0.02
   9   6   1    1.75    0.06
  -9  -6  -1    1.69    0.06
   9  -6   1    1.68    0.06
   9   6   2    0.67    0.03
  -9  -6  -2    0.62    0.03
   9  -6   2    0.62    0.03
   9   6   3    0.84    0.03
  -9  -6  -3    0.79    0.03
   9  -6   3    0.81    0.03
 -10   0  20    8.19    0.22
 -10   0  20    8.32    0.23
 -10   0  20    8.02    0.18
 -10   0  20    8.02    0.18
 -10   0  19    0.01    0.01
  10   0 -19    0.01    0.01
  10   0 -19    0.01    0.01
 -10   0  19    0.01    0.01
 -10   0  19    0.00    0.01
 -10   0  19    0.01    0.01
 -10   0  18    1.13    0.05
 -10   0  18    1.11    0.05
 -10   0  18    1.15    0.06
 -10   0  18    1.11    0.05
 -10   0  17   -0.01    0.01
 -10   0  17    0.00    0.02
 -10   0  17   -0.01    0.01
 -10   0  17    0.01    0.02
 -10   0  16    4.55    0.17
 -10   0  16    4.73    0.16
 -10   0  16    4.53    0.12
 -10   0  16    4.29    0.15
  10   0 -16    4.38    0.16
 -10   0  16    4.53    0.12
  10   0 -15    0.01    0.02
 -10   0  15    0.01    0.01
  10   0 -15    0.02    0.02
 -10   0  15    0.01    0.01
 -10   0  15    0.08    0.03
 -10   0  15    0.01    0.02
 -10   0  15   -0.01    0.01
  10   0 -14   18.65    0.61
 -10   0  14   18.36    0.54
  10   0 -14   17.78    0.60
 -10   0  14   18.65    0.42
 -10   0  14   18.65    0.42
 -10   0  14   19.13    0.50
  10   0 -14   18.26    0.64
  10   0 -14   17.38    0.57
  10   0 -13    0.03    0.02
  10   0 -13    0.01    0.02
  10   0 -13    0.02    0.02
  10   0 -12    4.37    0.19
  10   0 -12    4.22    0.17
  10   0 -12    3.96    0.17
  10   0 -11    0.01    0.02
  10   0 -11    0.01    0.02
  10   0 -11    0.01    0.01
  10   0 -11    0.01    0.01
  10   0 -11    0.00    0.02
  10   0 -10   31.80    1.04
  10   0 -10   32.26    0.78
  10   0 -10   31.02    1.00
  10   0 -10   31.69    0.97
  10   0 -10   32.26    0.78
  10   0  -9    0.00    0.01
  10   0  -9    0.01    0.01
  10   0  -9    0.01    0.01
  10   0  -8   15.09    0.38
  10   0  -8   15.09    0.38
  10   0  -8   15.00    0.51
  10   0  -7    0.02    0.01
  10   0  -7    0.00    0.01
  10   0  -7    0.00    0.01
  10   0  -6   76.43    2.40
  10   0  -6   76.72    1.81
  10   0  -6   76.72    1.81
  10   0  -5    0.02    0.01
  10   0  -5    0.02    0.01
  10   0  -5    0.01    0.01
  10   0  -4   19.43    0.48
  10   0  -4   19.43    0.48
  10   0  -4   19.58    0.63
  10   0  -3    0.00    0.01
 -10   0   3    0.01    0.01
  10   0  -3    0.00    0.01
  10   0  -2    0.43    0.03
  10   0  -2    0.43    0.03
 -10   0   2    0.37    0.03
 -10   0   1    0.10    0.02
  10   0  -1    0.02    0.01
  10   0  -1    0.02    0.01
 -10   0   0    6.59    0.23
  10   0   0    6.39    0.17
  10   0   0    6.39    0.17
  10   0   1   -0.01    0.01
 -10   0  -1   -0.01    0.01
  10   0   1   -0.01    0.01
  10   0   2   18.54    0.45
 -10   0  -2   17.74    0.61
  10   0   2   18.54    0.45
 -10   0  -3    0.00    0.01
 -10   0  -4    2.01    0.09
 -10   0  -5    0.01    0.01
 -10   0  -6    2.26    0.10
 -10   0  -7    0.00    0.01
 -10   0  -8    0.08    0.02
 -10   0  -9    0.05    0.02
 -10   0 -10    3.78    0.15
  10   0  11    0.00    0.01
 -10   0 -11    0.00    0.01
  10   0  11    0.00    0.01
  10   0  12    3.99    0.15
  10   0  12    4.14    0.12
  10   0  12    4.14    0.17
  10   0  12    4.14    0.12
  10   0  13    0.00    0.02
  10   0  13   -0.02    0.02
  10   0  13    0.00    0.01
  10   0  13    0.00    0.01
  10   0  14   10.12    0.32
  10   0  14    9.61    0.30
  10   0  15   -0.01    0.02
  10   0  15    0.00    0.01
  10   0  15    0.02    0.02
  10   0  15    0.00    0.01
  10   0  16    4.20    0.10
  10   0  16    4.14    0.13
  10   0  16    4.20    0.10
 -10   1  20    1.28    0.05
 -10   1  20    1.25    0.05
  10   1 -20    1.32    0.04
  10   1 -20    1.32    0.04
 -10  -1  20    1.26    0.05
 -10  -1  20    1.31    0.04
 -10  -1  20    1.31    0.04
 -10   1  19    0.02    0.01
 -10   1  19    0.00    0.01
  10   1 -19    0.00    0.01
  10   1 -19    0.01    0.01
  10   1 -19    0.00    0.01
 -10   1  19    0.01    0.01
 -10   1  19    0.01    0.01
 -10   1  19    0.01    0.01
  10  -1 -19    0.01    0.01
 -10  -1  19    0.00    0.01
 -10  -1  19    0.00    0.01
 -10  -1  19    0.01    0.01
 -10  -1  19    0.01    0.01
  10  -1 -19    0.01    0.01
 -10   1  18    0.77    0.04
  10   1 -18    0.71    0.05
 -10   1  18    0.78    0.05
 -10   1  18    0.71    0.03
 -10   1  18    0.77    0.05
 -10   1  18    0.86    0.05
 -10   1  18    0.71    0.03
  10  -1 -18    0.91    0.04
  10  -1 -18    0.91    0.04
 -10  -1  18    0.80    0.04
 -10  -1  18    0.80    0.04
 -10  -1  18    0.79    0.04
 -10  -1  18    0.73    0.05
 -10   1  17    0.09    0.02
  10   1 -17    0.10    0.02
 -10   1  17    0.09    0.02
 -10   1  17    0.07    0.02
 -10   1  17    0.10    0.02
 -10   1  17    0.10    0.02
 -10   1  17    0.09    0.02
 -10  -1  17    0.07    0.02
 -10  -1  17    0.11    0.02
  10  -1 -17    0.07    0.01
  10  -1 -17    0.07    0.01
 -10  -1  17    0.09    0.02
  10  -1 -17    0.08    0.02
 -10  -1  17    0.11    0.02
 -10   1  16    1.86    0.07
  10   1 -16    1.93    0.09
 -10   1  16    1.92    0.09
 -10   1  16    1.98    0.08
 -10   1  16    1.88    0.08
 -10   1  16    1.86    0.07
  10  -1 -16    1.90    0.10
 -10  -1  16    1.90    0.07
 -10  -1  16    1.86    0.09
 -10  -1  16    1.95    0.08
 -10  -1  16    1.90    0.07
 -10   1  15   18.41    0.54
 -10   1  15   18.95    0.54
 -10   1  15   18.55    0.51
 -10   1  15   18.83    0.42
  10   1 -15   19.72    0.58
 -10   1  15   18.83    0.42
 -10  -1  15   18.07    0.42
 -10  -1  15   18.07    0.42
 -10  -1  15   19.00    0.59
 -10  -1  15   18.73    0.51
  10  -1 -15   18.77    0.62
 -10   1  14   12.02    0.36
 -10   1  14   12.05    0.36
 -10   1  14   11.89    0.28
  10   1 -14   12.39    0.39
 -10   1  14   11.87    0.35
 -10   1  14   11.89    0.28
 -10  -1  14   12.21    0.34
 -10  -1  14   12.39    0.40
 -10  -1  14   12.38    0.29
  10  -1 -14   11.71    0.42
 -10  -1  14   12.38    0.29
  10   1 -13    0.28    0.05
 -10   1  13    0.29    0.05
  10  -1 -13    0.34    0.04
  10  -1 -13    0.28    0.05
  10  -1 -13    0.31    0.04
  10  -1 -13    0.31    0.04
  10   1 -12    0.55    0.07
  10   1 -12    0.57    0.05
  10  -1 -12    0.59    0.04
  10  -1 -12    0.59    0.04
  10  -1 -12    0.57    0.06
  10   1 -11    0.49    0.06
  10   1 -11    0.54    0.06
  10  -1 -11    0.53    0.04
  10  -1 -11    0.50    0.05
  10  -1 -11    0.60    0.05
  10  -1 -11    0.53    0.04
  10   1 -10    2.16    0.11
  10   1 -10    2.34    0.12
  10  -1 -10    2.49    0.09
  10  -1 -10    2.50    0.11
  10  -1 -10    2.49    0.09
  10  -1 -10    2.43    0.12
  10   1  -9    2.86    0.10
  10   1  -9    2.58    0.12
  10   1  -9    2.86    0.10
  10   1  -9    2.48    0.13
  10  -1  -9    2.94    0.13
  10  -1  -9    2.92    0.12
  10  -1  -9    2.90    0.10
  10  -1  -9    2.90    0.10
  10   1  -8   33.47    0.81
  10   1  -8   33.47    0.81
  10   1  -8   32.99    1.08
  10  -1  -8   32.82    0.81
  10  -1  -8   32.82    0.81
  10  -1  -8   33.65    1.07
  10   1  -7   12.25    0.41
  10   1  -7   11.51    0.30
  10   1  -7   11.51    0.30
  10  -1  -7   11.73    0.39
  10  -1  -7   11.26    0.30
  10  -1  -7   11.26    0.30
  10   1  -6    0.68    0.04
  10   1  -6    0.68    0.04
  10   1  -6    0.68    0.05
  10  -1  -6    0.71    0.04
  10  -1  -6    0.82    0.05
  10  -1  -6    0.71    0.04
  10   1  -5    0.49    0.03
  10   1  -5    0.49    0.03
  10   1  -5    0.56    0.05
  10  -1  -5    0.51    0.03
  10  -1  -5    0.43    0.03
  10  -1  -5    0.51    0.03
  10   1  -4    1.55    0.08
  10   1  -4    1.56    0.06
  10   1  -4    1.56    0.06
  10  -1  -4    1.74    0.06
  10  -1  -4    1.74    0.06
 -10  -1   4    1.37    0.08
  10   1  -3   10.08    0.36
  10   1  -3   10.29    0.27
  10   1  -3   10.29    0.27
  10  -1  -3   10.33    0.26
  10  -1  -3   10.33    0.26
 -10  -1   3   10.42    0.37
  10   1  -2   61.55    1.97
  10   1  -2   62.73    1.49
  10   1  -2   62.73    1.49
 -10  -1   2   62.29    2.05
  10  -1  -2   62.93    1.48
  10  -1  -2   62.93    1.48
 -10   1   1  146.73    4.59
  10   1  -1  140.24    3.30
  10   1  -1  140.24    3.30
  10   1  -1  138.92    4.37
 -10  -1   1  131.84    4.58
  10   1   0    0.01    0.01
 -10   1   0    0.00    0.01
  10   1   0    0.03    0.01
  10   1   0    0.03    0.01
 -10  -1   0    0.01    0.01
  10   1   1   13.84    0.36
 -10   1  -1   13.71    0.49
  10   1   1   13.84    0.36
 -10  -1  -1   15.09    0.48
  10   1   2    1.94    0.08
 -10   1  -2    2.09    0.10
  10   1   2    1.94    0.08
 -10  -1  -2    2.14    0.09
  10   1   3    0.49    0.04
 -10   1  -3    0.51    0.04
  10   1   3    0.49    0.04
 -10  -1  -3    0.55    0.03
 -10   1  -4    2.74    0.12
  10   1   4    2.67    0.10
  10   1   4    2.67    0.10
 -10  -1  -4    2.83    0.11
 -10   1  -5    0.26    0.03
 -10   1  -5    0.30    0.03
 -10  -1  -5    0.28    0.02
 -10   1  -6    5.63    0.21
 -10   1  -6    5.84    0.23
 -10  -1  -6    6.12    0.21
 -10   1  -7   33.94    1.14
 -10   1  -7   33.94    1.06
 -10  -1  -7   34.14    1.11
 -10   1  -8    6.34    0.24
 -10   1  -8    6.16    0.22
 -10  -1  -8    6.16    0.22
 -10   1  -9    4.84    0.18
 -10   1  -9    4.95    0.20
 -10   1 -10    0.18    0.03
 -10   1 -10    0.17    0.03
 -10   1 -11    0.15    0.03
  10  -1  11    0.13    0.02
  10  -1  11    0.13    0.02
  10  -1  11    0.23    0.03
  10  -1  11    0.13    0.03
  10  -1  11    0.07    0.03
 -10   1 -12    0.36    0.04
  10  -1  12    0.32    0.03
  10  -1  12    0.32    0.03
  10  -1  12    0.29    0.04
  10  -1  12    0.41    0.04
  10  -1  12    0.24    0.04
 -10   1 -13   11.16    0.39
  10  -1  13   11.28    0.33
  10  -1  13   11.55    0.27
  10  -1  13   10.79    0.37
  10  -1  13   11.46    0.34
  10  -1  13   11.55    0.27
 -10   1 -14    0.03    0.02
  10  -1  14    0.01    0.01
  10  -1  14    0.02    0.02
  10  -1  14    0.04    0.02
  10  -1  14    0.01    0.01
  10  -1  14    0.03    0.02
  10  -1  15    0.74    0.04
  10  -1  15    0.79    0.04
  10  -1  15    0.73    0.05
  10  -1  15    0.79    0.04
  10  -1  15    0.78    0.05
  10  -1  16    0.47    0.03
  10  -1  16    0.46    0.03
  10  -1  16    0.46    0.03
  10  -1  16    0.46    0.04
  10  -1  16    0.53    0.03
  10  -1  17    0.69    0.03
  10  -1  17    0.69    0.03
 -10   2  19    0.40    0.03
 -10   2  19    0.42    0.03
  10   2 -19    0.40    0.03
 -10   2  19    0.45    0.03
 -10  -2  19    0.46    0.02
  10  -2 -19    0.40    0.03
 -10   2  18    0.13    0.02
  10   2 -18    0.12    0.02
 -10   2  18    0.09    0.02
 -10   2  18    0.14    0.02
 -10   2  18    0.15    0.02
 -10  -2  18    0.12    0.02
 -10  -2  18    0.12    0.01
 -10  -2  18    0.12    0.01
 -10  -2  18    0.13    0.02
 -10   2  17    0.15    0.02
 -10   2  17    0.09    0.02
  10   2 -17    0.11    0.02
 -10   2  17    0.13    0.02
 -10   2  17    0.10    0.02
 -10  -2  17    0.12    0.02
 -10  -2  17    0.11    0.02
 -10  -2  17    0.10    0.02
 -10  -2  17    0.10    0.02
 -10   2  16    4.45    0.15
  10   2 -16    4.43    0.16
 -10   2  16    4.33    0.15
 -10   2  16    4.48    0.15
 -10   2  16    4.30    0.15
  10  -2 -16    4.50    0.18
 -10  -2  16    4.60    0.17
 -10  -2  16    4.53    0.14
 -10   2  15    0.02    0.02
  10   2 -15    0.01    0.02
 -10   2  15    0.03    0.02
 -10   2  15    0.05    0.02
 -10   2  15    0.02    0.02
 -10  -2  15    0.02    0.02
 -10  -2  15   -0.01    0.01
  10  -2 -15    0.01    0.02
 -10   2  14    4.83    0.17
 -10   2  14    4.79    0.17
 -10   2  14    4.96    0.17
 -10   2  14    5.21    0.17
  10   2 -14    4.99    0.18
 -10  -2  14    5.06    0.19
  10  -2 -14    5.07    0.20
 -10  -2  14    4.88    0.16
  10   2 -13    0.87    0.06
 -10   2  13    0.90    0.06
 -10   2  13    0.85    0.06
 -10   2  13    0.83    0.06
 -10   2  13    0.74    0.05
 -10  -2  13    0.76    0.05
 -10  -2  13    0.94    0.06
  10  -2 -13    0.88    0.06
  10   2 -12    0.29    0.06
  10   2 -12    0.23    0.05
  10  -2 -12    0.36    0.05
  10  -2 -12    0.27    0.05
  10  -2 -12    0.35    0.04
  10  -2 -12    0.35    0.04
  10   2 -11    2.48    0.13
  10   2 -11    2.51    0.14
  10  -2 -11    2.49    0.10
  10  -2 -11    2.49    0.13
  10  -2 -11    2.39    0.12
  10  -2 -11    2.49    0.10
  10   2 -10    0.80    0.07
  10   2 -10    0.75    0.06
  10  -2 -10    0.70    0.05
  10  -2 -10    0.70    0.05
  10  -2 -10    0.96    0.06
  10  -2 -10    0.77    0.06
  10   2  -9    8.40    0.31
  10   2  -9    8.61    0.33
  10  -2  -9    8.75    0.30
  10  -2  -9    8.44    0.24
  10  -2  -9    8.44    0.24
  10  -2  -9    8.42    0.31
  10   2  -8    4.03    0.17
  10   2  -8    4.24    0.19
  10  -2  -8    4.14    0.17
  10  -2  -8    4.18    0.13
  10  -2  -8    4.16    0.17
  10  -2  -8    4.18    0.13
  10   2  -7    0.17    0.04
  10   2  -7    0.14    0.02
  10   2  -7    0.14    0.02
  10   2  -7    0.17    0.03
  10  -2  -7    0.15    0.02
  10  -2  -7    0.15    0.02
  10   2  -6   25.27    0.85
  10   2  -6   25.39    0.64
  10   2  -6   25.39    0.64
  10   2  -5    3.01    0.14
  10   2  -5    2.37    0.10
  10   2  -5    2.37    0.10
  10  -2  -5    2.53    0.09
  10  -2  -5    2.53    0.09
  10   2  -4    9.63    0.27
  10   2  -4   10.05    0.36
  10   2  -4    9.63    0.27
  10  -2  -4    9.84    0.26
  10  -2  -4    9.84    0.26
  10   2  -3   27.00    0.91
  10   2  -3   26.70    0.69
  10   2  -3   26.70    0.69
  10  -2  -3   28.54    0.67
 -10  -2   3   28.01    0.94
  10  -2  -3   28.54    0.67
  10   2  -2    1.31    0.06
  10   2  -2    1.17    0.08
  10   2  -2    1.31    0.06
 -10  -2   2    1.27    0.08
  10   2  -1    3.81    0.13
  10   2  -1    3.81    0.13
  10   2  -1    3.84    0.17
 -10  -2   1    3.85    0.17
  10   2   0   69.04    2.27
  10   2   0   73.16    1.72
  10   2   0   73.16    1.72
 -10  -2   0   71.49    2.36
  10   2   1    3.93    0.13
  10   2   1    3.95    0.17
  10   2   1    3.93    0.13
 -10  -2  -1    3.96    0.16
 -10   2  -2   14.81    0.50
  10   2   2   15.30    0.40
 -10   2  -2   15.85    0.54
  10   2   2   15.30    0.40
  10   2   2   14.70    0.52
 -10  -2  -2   14.77    0.52
 -10   2  -3    4.43    0.18
  10   2   3    4.48    0.15
  10   2   3    4.98    0.19
  10   2   3    4.48    0.15
 -10   2  -3    4.71    0.19
 -10  -2  -3    4.50    0.18
  10   2   4   16.71    0.43
  10   2   4   14.86    0.55
 -10   2  -4   16.34    0.58
 -10   2  -4   16.15    0.54
  10   2   4   16.71    0.43
 -10  -2  -4   16.77    0.56
  10   2   5    0.29    0.04
 -10   2  -5    0.35    0.05
  10   2   5    0.29    0.04
 -10   2  -5    0.29    0.04
 -10  -2  -5    0.36    0.03
  10   2   6    3.90    0.14
 -10   2  -6    3.91    0.18
  10   2   6    3.90    0.14
 -10   2  -6    3.93    0.16
 -10  -2  -6    3.91    0.15
 -10   2  -7   14.59    0.53
 -10   2  -7   15.03    0.50
 -10  -2  -7   14.77    0.50
 -10   2  -8    6.84    0.28
 -10   2  -8    6.67    0.25
 -10   2  -9    2.31    0.12
 -10   2  -9    2.26    0.12
 -10   2 -10    0.62    0.06
  10  -2  10    0.57    0.04
  10  -2  10    0.57    0.06
  10  -2  10    0.56    0.04
  10  -2  10    0.64    0.05
  10  -2  10    0.57    0.04
 -10   2 -11    0.04    0.02
  10  -2  11    0.07    0.02
  10  -2  11    0.04    0.02
  10  -2  11    0.07    0.02
  10  -2  11    0.02    0.02
  10  -2  11    0.02    0.02
 -10   2 -12    0.27    0.04
  10  -2  12    0.31    0.04
  10  -2  12    0.29    0.03
  10  -2  12    0.29    0.03
  10  -2  12    0.29    0.04
  10  -2  12    0.27    0.03
 -10   2 -13    0.49    0.05
  10  -2  13    0.45    0.04
  10  -2  13    0.52    0.03
  10  -2  13    0.50    0.04
  10  -2  13    0.49    0.05
  10  -2  13    0.52    0.03
  10  -2  14    0.99    0.05
  10  -2  14    0.95    0.04
  10  -2  14    1.02    0.05
  10  -2  14    0.95    0.04
  10  -2  14    0.93    0.06
  10  -2  15    2.65    0.07
  10  -2  15    2.58    0.10
  10  -2  15    2.70    0.09
  10  -2  15    2.65    0.07
  10  -2  15    2.63    0.09
  10  -2  16    0.82    0.04
  10  -2  16    0.86    0.04
  10  -2  16    0.82    0.03
  10  -2  16    0.82    0.04
  10  -2  16    0.82    0.03
 -10   3  17    0.03    0.01
 -10   3  17    0.02    0.01
  10   3 -17    0.02    0.01
 -10   3  17    0.02    0.01
 -10   3  17    0.02    0.01
 -10  -3  17    0.02    0.01
  10  -3 -17    0.02    0.01
 -10   3  16    1.46    0.06
 -10   3  16    1.62    0.07
 -10   3  16    1.54    0.07
 -10   3  16    1.52    0.06
  10   3 -16    1.53    0.07
  10  -3 -16    1.64    0.07
 -10  -3  16    1.55    0.06
 -10  -3  16    1.51    0.07
 -10   3  15    0.03    0.02
  10   3 -15    0.04    0.02
 -10   3  15    0.00    0.01
 -10   3  15    0.02    0.02
 -10   3  15    0.04    0.02
 -10  -3  15    0.03    0.01
  10  -3 -15    0.02    0.01
 -10  -3  15    0.04    0.02
 -10   3  14    5.39    0.17
 -10   3  14    5.81    0.19
 -10   3  14    5.61    0.18
 -10   3  14    5.70    0.18
  10   3 -14    5.55    0.19
  10  -3 -14    5.56    0.18
 -10  -3  14    5.43    0.20
 -10  -3  14    5.60    0.17
  10  -3 -14    5.71    0.21
 -10   3  13    0.72    0.05
  10   3 -13    0.68    0.05
 -10   3  13    0.69    0.05
 -10   3  13    0.72    0.05
 -10   3  13    0.76    0.05
 -10  -3  13    0.75    0.04
  10  -3 -13    0.71    0.06
  10  -3 -13    0.69    0.05
 -10  -3  13    0.75    0.05
  10   3 -12    1.74    0.08
 -10   3  12    1.75    0.08
 -10   3  12    1.77    0.08
 -10   3  12    1.76    0.08
 -10  -3  12    1.72    0.07
  10  -3 -12    1.70    0.09
 -10  -3  12    1.70    0.09
  10  -3 -12    1.71    0.08
 -10   3  11    0.40    0.04
 -10   3  11    0.52    0.05
  10  -3 -11    0.44    0.04
  10  -3 -11    0.39    0.05
 -10  -3  11    0.43    0.03
  10   3 -10   12.22    0.47
 -10   3  10   12.98    0.38
 -10   3  10   12.56    0.37
  10  -3 -10   11.92    0.34
  10  -3 -10   11.85    0.36
 -10  -3  10   12.44    0.34
  10  -3 -10   12.45    0.43
  10  -3 -10   11.92    0.34
  10   3  -9    3.11    0.16
  10   3  -9    3.22    0.17
  10  -3  -9    3.14    0.12
  10  -3  -9    3.14    0.12
  10   3  -8    3.40    0.18
  10   3  -8    3.27    0.16
  10  -3  -8    3.48    0.12
  10  -3  -8    3.48    0.12
  10   3  -7   12.69    0.48
  10   3  -7   12.88    0.44
  10  -3  -7   12.74    0.34
  10  -3  -7   12.74    0.34
  10   3  -6    4.76    0.21
  10   3  -6    4.61    0.19
  10  -3  -6    4.19    0.14
  10  -3  -6    4.19    0.14
  10   3  -5    2.58    0.15
  10  -3  -5    2.70    0.10
  10  -3  -5    2.70    0.10
  10   3  -4   10.55    0.30
  10   3  -4   10.55    0.30
  10   3  -4   10.10    0.40
  10   3  -3    1.91    0.12
  10   3  -3    2.29    0.10
  10   3  -3    2.29    0.10
 -10  -3   3    2.19    0.10
  10   3  -2   18.07    0.48
  10   3  -2   18.07    0.48
  10   3  -2   17.65    0.63
 -10  -3   2   17.43    0.64
 -10  -3   2   17.87    0.57
  10   3  -1    5.42    0.18
  10   3  -1    5.21    0.23
  10   3  -1    5.42    0.18
 -10  -3   1    5.52    0.20
 -10  -3   1    5.43    0.23
  10   3   0    1.32    0.07
  10   3   0    1.18    0.09
  10   3   0    1.32    0.07
 -10  -3   0    1.28    0.07
 -10  -3   0    1.35    0.09
  10   3   1    2.28    0.10
  10   3   1    2.28    0.10
  10   3   1    2.36    0.13
 -10  -3  -1    2.25    0.10
  10   3   2    6.68    0.28
  10   3   2    6.73    0.22
  10   3   2    6.73    0.22
 -10  -3  -2    6.69    0.23
 -10  -3  -2    6.88    0.27
  10   3   3    0.05    0.02
  10   3   3    0.05    0.02
  10   3   3    0.01    0.02
 -10  -3  -3    0.01    0.01
 -10  -3  -3    0.00    0.01
  10   3   4    3.33    0.13
  10   3   4    3.33    0.13
  10   3   4    3.07    0.16
 -10  -3  -4    3.20    0.15
 -10  -3  -4    3.27    0.13
  10   3   5    1.53    0.08
 -10   3  -5    1.67    0.10
  10   3   5    1.48    0.10
  10   3   5    1.53    0.08
 -10  -3  -5    1.66    0.09
  10   3   6    0.06    0.03
  10   3   6    0.03    0.02
  10   3   6    0.03    0.02
 -10   3  -6    0.04    0.03
 -10  -3  -6    0.01    0.01
 -10   3  -7    3.61    0.16
  10   3   7    3.53    0.14
  10   3   7    3.53    0.14
  10  -3   7    3.55    0.13
 -10  -3  -7    3.42    0.15
  10  -3   7    3.64    0.13
 -10   3  -8    1.07    0.08
  10  -3   8    0.99    0.06
  10  -3   8    1.11    0.06
 -10   3  -9    1.58    0.10
  10  -3   9    1.57    0.07
  10  -3   9    1.59    0.06
  10  -3   9    1.67    0.08
  10  -3   9    1.59    0.06
 -10   3 -10    9.64    0.35
  10  -3  10    9.46    0.32
  10  -3  10   10.02    0.29
  10  -3  10    9.72    0.23
  10  -3  10   10.29    0.30
  10  -3  10    9.72    0.23
 -10   3 -11    4.61    0.19
  10  -3  11    4.54    0.12
  10  -3  11    4.54    0.12
  10  -3  11    4.67    0.17
  10  -3  11    4.76    0.15
  10  -3  11    4.58    0.16
  10  -3  12    4.19    0.16
  10  -3  12    4.52    0.15
  10  -3  12    4.49    0.12
  10  -3  12    4.34    0.14
  10  -3  12    4.49    0.12
  10  -3  13    0.07    0.02
  10  -3  13    0.07    0.02
  10  -3  13    0.04    0.01
  10  -3  13    0.04    0.01
  10  -3  13    0.04    0.02
  10  -3  14    2.93    0.10
  10  -3  14    2.75    0.07
  10  -3  14    2.88    0.10
  10  -3  14    2.95    0.09
  10  -3  14    2.75    0.07
 -10   4  15    0.13    0.02
 -10   4  15    0.13    0.02
  10  -4 -15    0.12    0.02
 -10  -4  15    0.10    0.01
 -10   4  14    3.15    0.11
 -10   4  14    3.21    0.11
 -10  -4  14    3.24    0.10
  10  -4 -14    3.24    0.11
 -10   4  13    0.25    0.03
 -10   4  13    0.22    0.03
 -10  -4  13    0.25    0.02
  10  -4 -13    0.22    0.03
 -10   4  12    1.81    0.08
 -10   4  12    1.88    0.08
  10  -4 -12    1.81    0.08
 -10  -4  12    1.73    0.07
 -10   4  11    2.34    0.10
 -10   4  11    2.39    0.10
 -10  -4  11    2.46    0.09
  10  -4 -11    2.29    0.10
 -10   4  10    2.10    0.09
 -10   4  10    2.24    0.09
 -10  -4  10    2.23    0.08
  10  -4 -10    2.18    0.09
 -10   4   9    5.68    0.19
 -10   4   9    5.75    0.19
  10  -4  -9    5.58    0.19
 -10  -4   9    5.79    0.17
 -10   4   8    2.97    0.12
 -10   4   8    2.83    0.12
 -10  -4   8    3.05    0.10
  10  -4  -8    3.16    0.12
  10   4  -7    1.38    0.06
 -10   4   7    1.46    0.07
 -10   4   7    1.44    0.08
  10  -4  -7    1.57    0.08
 -10  -4   7    1.45    0.06
 -10   4   6    5.49    0.19
  10   4  -6    5.52    0.17
 -10   4   6    5.56    0.18
  10  -4  -6    5.58    0.19
 -10  -4   6    5.71    0.17
 -10   4   5    1.60    0.08
  10   4  -5    1.89    0.14
 -10   4   5    1.64    0.08
  10   4  -5    1.74    0.07
  10  -4  -5    1.70    0.08
 -10  -4   5    1.73    0.07
 -10   4   4    0.13    0.03
  10   4  -4    0.20    0.03
  10   4  -4    0.11    0.04
 -10   4   4    0.16    0.03
 -10  -4   4    0.16    0.02
  10  -4  -4    0.17    0.03
  10  -4  -4    0.17    0.03
  10   4  -3    9.74    0.39
  10   4  -2    1.69    0.12
 -10  -4   2    1.77    0.09
  10   4  -1    0.35    0.05
  10   4  -1    0.36    0.06
  10   4  -1    0.35    0.05
 -10  -4   1    0.50    0.04
  10   4   0   11.39    0.44
  10   4   0   11.22    0.34
  10   4   0   11.22    0.34
 -10  -4   0   11.63    0.45
 -10  -4   0   11.75    0.39
  10   4   1    2.97    0.16
  10   4   1    2.73    0.12
  10   4   1    2.99    0.10
  10   4   1    2.73    0.12
 -10  -4  -1    2.61    0.15
  10  -4   1    2.89    0.11
 -10  -4  -1    2.89    0.12
  10  -4   1    2.38    0.10
  10   4   2    0.03    0.02
  10  -4   2    0.02    0.02
 -10  -4  -2    0.03    0.03
  10  -4   2    0.03    0.02
 -10  -4  -2    0.04    0.02
  10   4   3    8.00    0.23
 -10  -4  -3    7.93    0.28
  10  -4   3    7.58    0.23
  10  -4   3    8.05    0.24
  10   4   4    0.41    0.04
  10  -4   4    0.37    0.03
 -10  -4  -4    0.40    0.04
  10  -4   4    0.46    0.04
  10   4   5    4.36    0.14
  10  -4   5    4.30    0.14
 -10  -4  -5    4.53    0.17
  10  -4   5    4.37    0.15
  10   4   6    4.89    0.16
 -10  -4  -6    5.10    0.18
  10  -4   6    4.91    0.16
  10  -4   6    4.99    0.16
  10   4   7    0.31    0.03
  10  -4   7    0.40    0.04
  10  -4   7    0.35    0.03
 -10  -4  -7    0.34    0.03
  10  -4   8    0.01    0.01
  10  -4   8   -0.01    0.01
  10  -4   8    0.00    0.02
 -10  -4  -8    0.01    0.01
  10  -4   9    1.64    0.06
  10  -4   9    1.55    0.07
 -10  -4  -9    1.54    0.07
  10  -4   9    1.52    0.07
  10  -4  10    0.14    0.02
  10  -4  10    0.14    0.02
  10  -4  10    0.13    0.02
  10  -4  11    0.01    0.01
  10  -4  11    0.00    0.01
  10  -4  11   -0.01    0.01
  10  -4  12    0.06    0.01
 -10   5  12    0.05    0.01
  10  -5 -12    0.06    0.01
  10  -5 -12    0.05    0.01
 -10  -5  12    0.04    0.01
 -10   5  11    0.43    0.03
 -10  -5  11    0.44    0.03
  10  -5 -11    0.48    0.03
  10  -5 -11    0.45    0.03
 -10   5  10    0.42    0.03
  10  -5 -10    0.40    0.03
 -10  -5  10    0.38    0.03
  10  -5 -10    0.39    0.03
 -10   5   9    0.25    0.03
 -10  -5   9    0.24    0.02
  10  -5  -9    0.23    0.02
  10  -5  -9    0.22    0.02
 -10   5   8    2.40    0.09
  10  -5  -8    2.30    0.09
  10  -5  -8    2.24    0.09
 -10  -5   8    2.23    0.08
 -10   5   7    1.40    0.06
  10  -5  -7    1.35    0.06
 -10  -5   7    1.46    0.06
  10  -5  -7    1.35    0.06
 -10   5   6    1.14    0.06
  10   5  -6    1.14    0.05
  10  -5  -6    1.07    0.05
  10  -5  -6    1.15    0.06
 -10  -5   6    1.19    0.05
  10   5  -5    0.78    0.04
 -10   5   5    0.69    0.04
  10  -5  -5    0.77    0.05
 -10  -5   5    0.72    0.04
  10  -5  -5    0.80    0.05
 -10   5   4    5.82    0.18
  10   5  -4    5.79    0.18
  10  -5  -4    5.91    0.18
 -10  -5   4    5.78    0.17
  10  -5  -4    5.88    0.19
  10   5  -3   -0.01    0.01
 -10   5   3    0.00    0.01
  10  -5  -3    0.00    0.01
 -10  -5   3    0.01    0.01
  10  -5  -3    0.04    0.02
  10   5  -2    0.02    0.01
  10  -5  -2    0.02    0.02
  10  -5  -2    0.01    0.02
 -10  -5   2    0.02    0.01
  10   5  -1    3.89    0.13
  10  -5  -1    3.77    0.13
  10  -5  -1    3.84    0.13
  10   5   0    0.71    0.04
  10  -5   0    0.72    0.04
 -10  -5   0    0.68    0.05
  10  -5   0    0.80    0.05
  10   5   1    3.13    0.11
  10  -5   1    3.20    0.11
  10  -5   1    3.21    0.11
 -10  -5  -1    2.95    0.13
  10   5   2    0.64    0.04
  10  -5   2    0.72    0.04
  10  -5   2    0.67    0.04
 -10  -5  -2    0.76    0.05
  10   5   3    5.19    0.16
  10  -5   3    5.21    0.16
  10  -5   3    5.06    0.16
 -10  -5  -3    4.71    0.18
  10   5   4    1.36    0.06
  10  -5   4    1.40    0.06
 -10  -5  -4    1.37    0.07
  10  -5   4    1.36    0.06
  10   5   5    3.80    0.12
  10  -5   5    3.76    0.12
  10  -5   5    3.68    0.12
  10   5   6    0.06    0.01
  10  -5   6    0.08    0.01
  10  -5   6    0.07    0.02
  10   5   7    0.16    0.02
  10  -5   7    0.16    0.02
  10  -5   7    0.16    0.02
  10   5   8    0.01    0.01
  10  -5   8    0.00    0.01
  10  -5   8    0.01    0.01
  10  -5   9    0.38    0.02
 -10  -6   5    0.84    0.03
  10  -6  -5    0.82    0.03
  10  -6  -4    0.40    0.02
 -10  -6   4    0.46    0.02
  10  -6  -3    0.17    0.02
  10  -6  -3    0.26    0.02
 -10  -6   3    0.22    0.02
  10   6  -2    5.19    0.14
  10  -6  -2    5.03    0.15
 -10  -6   2    5.17    0.14
  10  -6  -2    5.06    0.15
  10   6  -1    0.13    0.01
  10  -6  -1    0.14    0.01
 -10  -6   1    0.11    0.01
  10  -6  -1    0.18    0.02
  10   6   0    0.98    0.04
  10  -6   0    0.95    0.04
  10  -6   0    0.94    0.04
 -10  -6   0    0.99    0.04
  10   6   1    0.07    0.01
 -10  -6  -1    0.07    0.01
  10  -6   1    0.08    0.01
  10   6   2    0.05    0.01
 -10  -6  -2    0.05    0.01
  11   0 -20    3.18    0.08
 -11   0  20    3.26    0.08
 -11   0  20    3.37    0.10
 -11   0  20    3.26    0.08
  11   0 -20    3.18    0.08
  11   0 -19    0.00    0.01
 -11   0  19    0.02    0.01
 -11   0  19    0.01    0.01
  11   0 -19    0.00    0.01
 -11   0  19    0.01    0.01
 -11   0  19    0.01    0.01
 -11   0  18    1.56    0.06
 -11   0  18    1.46    0.05
 -11   0  18    1.46    0.05
 -11   0  18    1.49    0.07
 -11   0  17    0.03    0.01
 -11   0  17    0.03    0.01
 -11   0  17    0.00    0.01
  11   0 -17   -0.02    0.02
 -11   0  17    0.07    0.02
 -11   0  16   17.25    0.54
 -11   0  16   17.35    0.50
 -11   0  16   17.49    0.40
  11   0 -16   17.74    0.54
 -11   0  16   17.65    0.48
 -11   0  16   17.49    0.40
  11   0 -15    0.03    0.02
 -11   0  15    0.01    0.02
 -11   0  15    0.00    0.02
 -11   0  15    0.01    0.02
 -11   0  15    0.01    0.01
 -11   0  15    0.01    0.01
 -11   0  14   18.24    0.41
 -11   0  14   17.79    0.49
  11   0 -14   17.63    0.56
 -11   0  14   18.27    0.56
 -11   0  14   18.24    0.41
 -11   0  14   17.90    0.52
  11   0 -13    0.00    0.02
  11   0 -12    0.91    0.07
  11   0 -11    0.00    0.01
  11   0 -11    0.00    0.01
  11   0 -11    0.04    0.02
  11   0 -10    0.04    0.02
  11   0 -10    0.04    0.02
  11   0 -10    0.03    0.02
  11   0  -9    0.02    0.01
  11   0  -9    0.02    0.01
  11   0  -9    0.01    0.01
  11   0  -8    3.29    0.11
  11   0  -8    3.29    0.11
  11   0  -8    3.54    0.15
  11   0  -7    0.22    0.03
  11   0  -6   37.23    0.89
  11   0  -6   37.23    0.89
  11   0  -6   36.76    1.18
  11   0  -5    0.01    0.01
  11   0  -5    0.01    0.01
  11   0  -5    0.01    0.01
  11   0  -4   31.94    0.76
  11   0  -4   30.58    1.00
  11   0  -4   31.94    0.76
  11   0  -3    0.00    0.01
 -11   0   3    0.00    0.01
  11   0  -3    0.00    0.01
  11   0  -2    5.34    0.15
 -11   0   2    5.77    0.21
  11   0  -2    5.34    0.15
  11   0  -1    0.03    0.01
  11   0  -1    0.03    0.01
 -11   0   1    0.01    0.01
  11   0   0  125.35    2.90
  11   0   0  125.35    2.90
 -11   0   0  120.23    4.05
 -11   0  -1    0.00    0.01
  11   0   1    0.02    0.01
  11   0   1    0.02    0.01
 -11   0  -2    8.06    0.29
 -11   0  -3   -0.01    0.01
 -11   0  -4  101.86    3.33
 -11   0  -5    0.12    0.02
 -11   0  -6    7.95    0.28
 -11   0  -7    0.00    0.01
 -11   0  -8   31.87    1.06
 -11   0  -9    0.00    0.01
 -11   0 -10    0.03    0.01
  11   0  11    0.02    0.02
  11   0  11    0.02    0.02
  11   0  11    0.00    0.02
  11   0  12    2.16    0.11
  11   0  12    2.32    0.08
  11   0  12    2.32    0.08
  11   0  13    0.01    0.01
  11   0  13    0.00    0.02
  11   0  13    0.01    0.01
  11   0  14    0.75    0.04
  11   0  14    0.75    0.04
  11   0  14    0.71    0.05
  11   0  15    0.00    0.01
  11   0  15    0.01    0.01
  11   0  15    0.01    0.01
 -11   1  19    0.88    0.04
 -11   1  19    0.87    0.04
 -11   1  19    0.90    0.03
 -11   1  19    0.90    0.03
 -11   1  19    0.87    0.04
  11   1 -19    0.93    0.03
  11   1 -19    0.91    0.05
  11   1 -19    0.93    0.03
  11  -1 -19    0.94    0.03
 -11  -1  19    0.91    0.03
 -11  -1  19    0.91    0.03
  11  -1 -19    0.94    0.03
 -11  -1  19    0.89    0.04
  11   1 -18    2.55    0.10
 -11   1  18    2.63    0.08
  11   1 -18    2.74    0.08
 -11   1  18    2.63    0.08
 -11   1  18    2.57    0.09
 -11   1  18    2.60    0.10
  11   1 -18    2.74    0.08
 -11   1  18    2.55    0.09
  11  -1 -18    2.54    0.07
 -11  -1  18    2.54    0.10
  11  -1 -18    2.54    0.07
 -11  -1  18    2.53    0.07
 -11  -1  18    2.53    0.07
 -11  -1  18    2.61    0.09
 -11   1  17    0.54    0.04
 -11   1  17    0.50    0.04
  11   1 -17    0.47    0.04
 -11   1  17    0.53    0.03
 -11   1  17    0.46    0.04
 -11   1  17    0.53    0.03
 -11  -1  17    0.48    0.04
 -11  -1  17    0.45    0.04
 -11  -1  17    0.50    0.03
  11  -1 -17    0.51    0.03
 -11  -1  17    0.50    0.03
  11  -1 -17    0.51    0.03
 -11   1  16    4.30    0.12
 -11   1  16    4.30    0.12
 -11   1  16    4.38    0.15
  11   1 -16    4.40    0.16
 -11   1  16    4.22    0.15
 -11   1  16    4.21    0.15
 -11  -1  16    4.02    0.16
 -11  -1  16    4.47    0.12
  11  -1 -16    4.63    0.12
  11  -1 -16    4.63    0.12
 -11  -1  16    4.47    0.12
 -11  -1  16    4.39    0.14
 -11   1  15   12.09    0.28
  11   1 -15   11.79    0.39
 -11   1  15   12.08    0.34
 -11   1  15   12.09    0.28
 -11   1  15   11.55    0.36
  11  -1 -15   12.36    0.28
  11  -1 -15   12.36    0.28
 -11  -1  15   12.24    0.28
 -11  -1  15   11.83    0.39
 -11  -1  15   12.24    0.28
  11  -1 -15   11.34    0.41
 -11  -1  15   11.67    0.34
 -11   1  14    3.01    0.12
 -11   1  14    3.14    0.12
 -11   1  14    3.01    0.10
 -11   1  14    3.01    0.10
 -11   1  14    3.23    0.12
  11   1 -14    3.28    0.13
 -11  -1  14    3.27    0.11
 -11  -1  14    3.13    0.13
  11  -1 -14    3.35    0.14
 -11  -1  14    3.08    0.10
 -11  -1  14    3.08    0.10
  11   1 -13    1.48    0.11
  11  -1 -13    1.56    0.07
  11  -1 -13    1.64    0.09
  11  -1 -13    1.56    0.07
  11  -1 -13    1.69    0.10
  11   1 -12    0.01    0.02
  11  -1 -12    0.07    0.02
  11  -1 -12    0.02    0.02
  11  -1 -12    0.01    0.02
  11  -1 -12    0.02    0.02
  11   1 -11    7.15    0.29
  11  -1 -11    7.16    0.28
  11  -1 -11    6.96    0.26
  11  -1 -11    7.17    0.21
  11  -1 -11    7.17    0.21
  11   1 -10    9.26    0.35
  11  -1 -10    9.02    0.33
  11  -1 -10    8.45    0.32
  11  -1 -10    9.46    0.25
  11  -1 -10    9.46    0.25
  11  -1  -9    0.18    0.03
  11   1  -8   16.14    0.56
  11   1  -8   16.34    0.42
  11   1  -8   16.34    0.42
  11  -1  -8   16.60    0.55
  11  -1  -8   16.13    0.41
  11  -1  -8   16.13    0.41
  11   1  -7    8.44    0.23
  11   1  -7    8.36    0.31
  11   1  -7    8.44    0.23
  11  -1  -7    8.63    0.23
  11  -1  -7    8.63    0.23
  11  -1  -7    8.62    0.30
  11   1  -6   25.33    0.62
  11   1  -6   25.33    0.62
  11   1  -6   25.41    0.83
  11  -1  -6   25.52    0.62
  11  -1  -6   23.64    0.81
  11  -1  -6   25.52    0.62
  11   1  -5   97.48    2.35
  11   1  -5   97.48    2.35
  11   1  -5   98.76    3.12
  11  -1  -5  101.52    2.34
  11  -1  -5  101.52    2.34
  11   1  -4    0.02    0.01
  11   1  -4    0.02    0.01
  11   1  -4    0.07    0.02
  11  -1  -4    0.02    0.01
  11  -1  -4    0.02    0.01
  11   1  -3    3.64    0.12
  11   1  -3    3.64    0.12
  11   1  -3    3.74    0.15
  11  -1  -3    3.65    0.11
  11  -1  -3    3.65    0.11
 -11  -1   3    3.61    0.16
  11   1  -2   72.50    1.74
  11   1  -2   72.50    1.74
  11   1  -2   75.43    2.30
  11  -1  -2   73.37    1.73
  11  -1  -2   73.37    1.73
 -11  -1   2   71.97    2.40
 -11   1   1    0.00    0.01
  11   1  -1    0.02    0.01
  11   1  -1    0.02    0.01
  11   1  -1    0.02    0.02
  11  -1  -1    0.00    0.01
 -11  -1   1    0.03    0.02
  11  -1  -1    0.00    0.01
 -11   1   0    8.81    0.32
  11   1   0    8.93    0.24
  11   1   0    8.93    0.24
 -11  -1   0    8.48    0.31
 -11   1  -1    0.08    0.02
  11   1   1    0.11    0.02
  11   1   1    0.11    0.02
 -11  -1  -1    0.06    0.02
 -11   1  -2    2.24    0.10
  11   1   2    2.22    0.08
  11   1   2    2.22    0.08
 -11  -1  -2    2.17    0.10
  11   1   3   51.17    1.25
  11   1   3   51.17    1.25
 -11   1  -3   52.70    1.72
 -11  -1  -3   53.03    1.70
 -11   1  -4   33.91    1.04
  11   1   4   32.21    0.82
 -11   1  -4   34.06    1.12
  11   1   4   32.21    0.82
 -11  -1  -4   34.20    1.10
 -11   1  -5    1.20    0.07
 -11   1  -5    1.36    0.07
 -11  -1  -5    1.28    0.06
 -11   1  -6    0.68    0.05
 -11   1  -6    0.70    0.05
 -11  -1  -6    0.68    0.04
 -11   1  -7    3.03    0.13
 -11   1  -7    3.27    0.14
 -11  -1  -7    3.14    0.12
 -11   1  -8   11.88    0.40
 -11   1  -8   11.40    0.43
 -11  -1  -8   12.10    0.40
 -11   1  -9    0.03    0.02
 -11   1  -9    0.04    0.02
 -11   1 -10    0.58    0.05
 -11   1 -10    0.57    0.05
  11  -1  10    0.64    0.06
  11  -1  10    0.59    0.05
  11  -1  10    0.65    0.04
  11  -1  10    0.65    0.04
 -11   1 -11    0.24    0.04
  11  -1  11    0.16    0.03
  11  -1  11    0.20    0.03
  11  -1  11    0.21    0.04
  11  -1  11    0.20    0.03
 -11   1 -12   21.97    0.72
  11  -1  12   22.08    0.50
  11  -1  12   22.08    0.50
  11  -1  12   21.98    0.63
  11  -1  12   23.25    0.63
  11  -1  12   22.45    0.69
 -11   1 -13    0.35    0.04
  11  -1  13    0.36    0.03
  11  -1  13    0.36    0.04
  11  -1  13    0.28    0.04
  11  -1  13    0.36    0.03
  11  -1  13    0.33    0.03
 -11   1 -14   10.22    0.35
  11  -1  14   10.20    0.24
  11  -1  14   10.27    0.30
  11  -1  14    9.69    0.29
  11  -1  14   10.37    0.33
  11  -1  14   10.20    0.24
  11  -1  15    2.27    0.07
  11  -1  15    2.27    0.07
  11  -1  15    2.40    0.09
  11  -1  15    2.24    0.10
  11  -1  16    1.20    0.04
  11  -1  16    1.20    0.04
  11  -1  16    1.26    0.05
  11  -1  16    1.18    0.06
 -11   2  19    0.02    0.01
  11   2 -19    0.02    0.01
 -11   2  19    0.03    0.01
 -11   2  19    0.02    0.01
 -11  -2  19    0.01    0.01
  11  -2 -19    0.01    0.01
 -11   2  18    0.09    0.02
  11   2 -18    0.09    0.02
 -11   2  18    0.07    0.02
 -11   2  18    0.10    0.02
  11  -2 -18    0.07    0.02
 -11  -2  18    0.07    0.01
 -11   2  17    1.72    0.07
 -11   2  17    1.72    0.07
 -11   2  17    1.64    0.07
 -11   2  17    1.65    0.07
  11   2 -17    1.68    0.08
 -11  -2  17    1.78    0.08
 -11  -2  17    1.71    0.07
  11   2 -16    0.03    0.02
 -11   2  16    0.00    0.01
 -11   2  16    0.00    0.02
 -11   2  16    0.00    0.02
 -11   2  16    0.06    0.02
 -11  -2  16   -0.01    0.01
 -11  -2  16    0.00    0.02
 -11   2  15    0.16    0.03
 -11   2  15    0.18    0.03
 -11   2  15    0.11    0.03
  11   2 -15    0.14    0.03
 -11  -2  15    0.15    0.02
  11  -2 -15    0.11    0.03
 -11  -2  15    0.14    0.03
 -11   2  14    0.79    0.05
 -11   2  14    0.83    0.05
[truncated: 208,078 more chars]
